# Supplementary material for: Enduring epigenetic landmarks define the cancer microenvironment
Source: HighWire-hosted journal article supplement (doi:10.1101/gr.229070.117), 2018-04-12
Supplement: Supplemental_Figures_S1-8.pdf [file Supplemental_Figures_S1-8.pdf]

**Supplemental figures and tables for  
Pidsley et al., Enduring Epigenetic Landmarks Define the Cancer Microenvironment**

**Table of Contents** (Figures listed in order of citation in the text)

(Large Supplemental Tables 1-11 are available via separate links to .xlsx files at the Genome Research website).

- Fig. S1. CAFs and NPFs lack genetic copy number changes and have methylation profiles characteristic of non-malignant human cells.
- Fig. S2. Characteristics of CAF-NPF DMRs identified using WGBS.
- Fig. S3. Identification of regions of LMRs and UMRs in CAFs and NPFs with typical genomic distributions.
- Fig. S4. Cross-platform and biological validation of DE-DMRs.
- Fig. S5. Gene ontology and pathways analysis of DE-DMRs in CAFs compared to NPFs.
- Fig. S6. Validation of DE-DMRs in an independent cohort of patients.
- Fig. S7. Gene ontology and pathways analysis of tsDMRs in CAFs compared to NPFs.
- Fig. S8. Tumour-specific DMRs in CAFs and cancer cells.

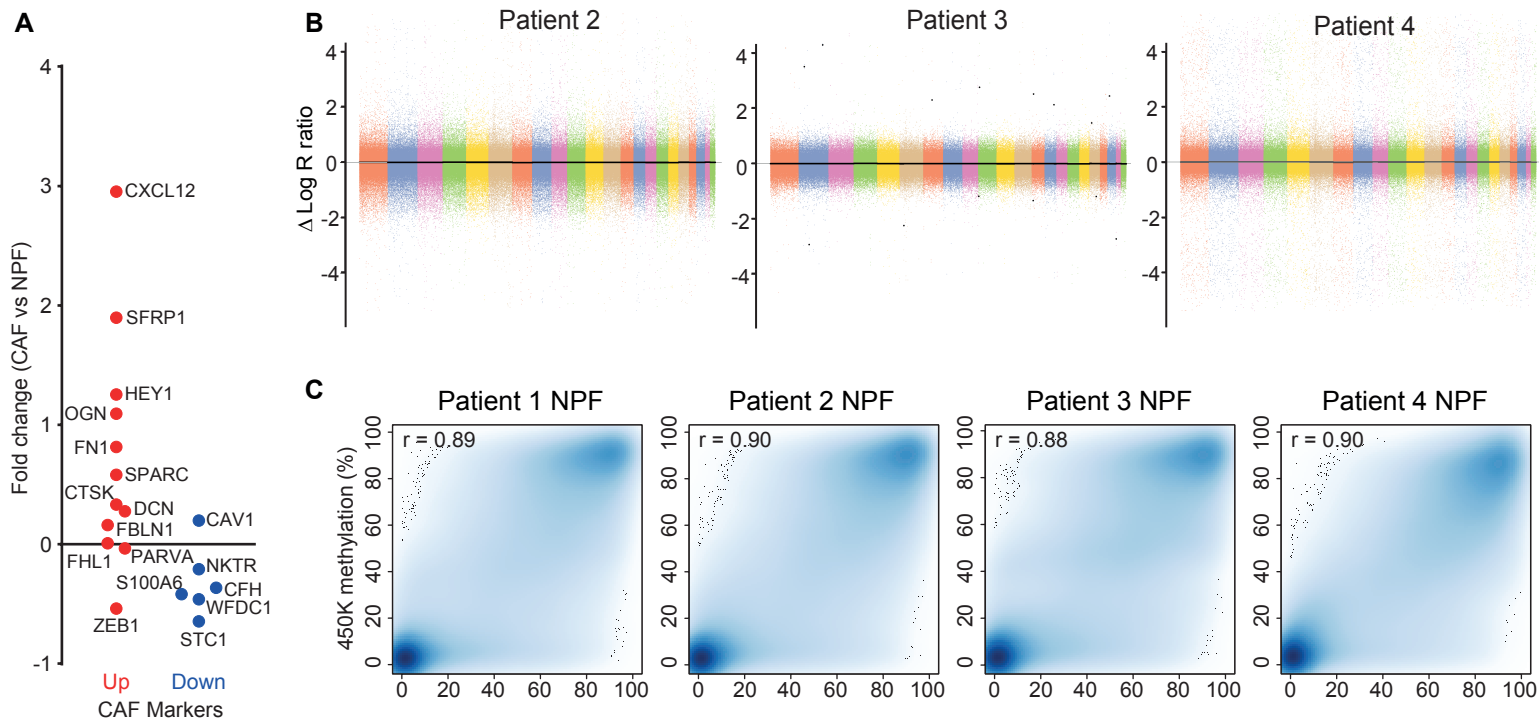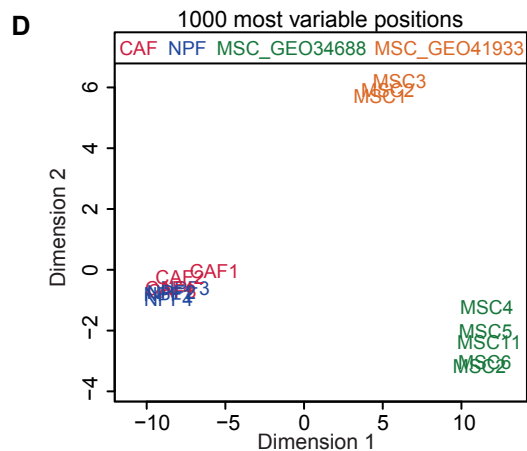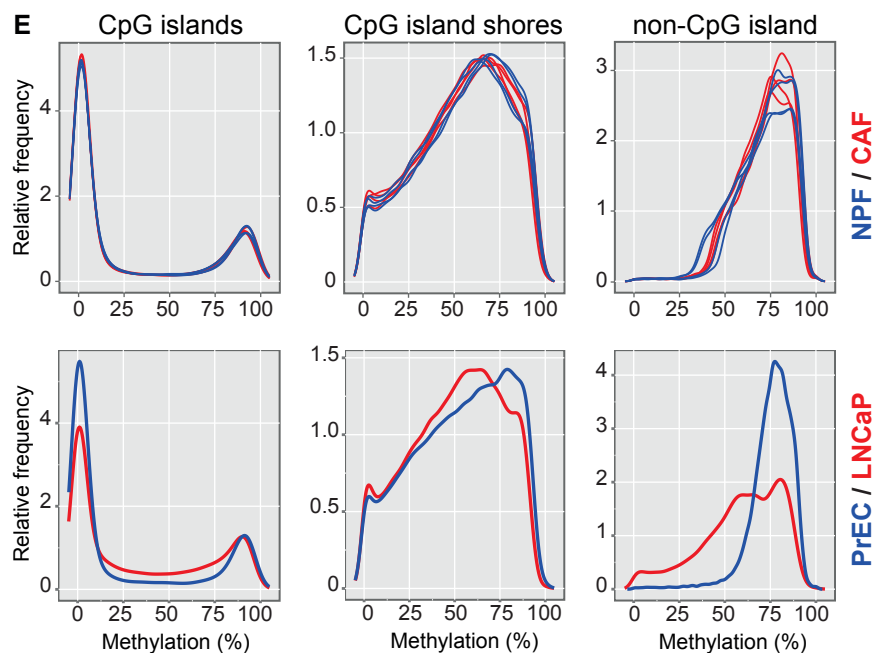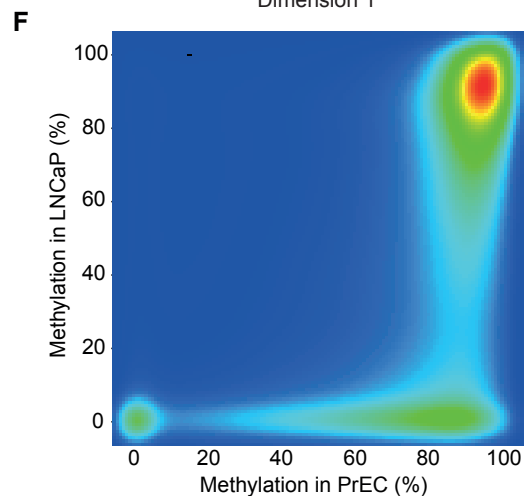

**Supplemental Fig. S1. CAFs and NPFs lack genetic copy number changes and have methylation profiles characteristic of non-malignant human cells.** (A) RNA-seq data for CAF markers shows similar expression differences to previous studies. (B) HumanOmni2.5-8 BeadChip genotyping data showing no evidence of large-scale copy number alterations within patient-matched prostate fibroblast samples. The difference in log R ratio between CAFs and NPFs (Patients 2-4) is plotted for each probe on the microarray, with genomic position along the x-axis and color changes indicating separate chromosomes. Circular binary segmentation of the smoothed log R ratio differences is represented by the black line, with  $y=0$  indicating no copy number alteration. (C) Scatter plots of DNA methylation between cross-platform replicates of WGBS and 450K arrays at CpG sites interrogated by both platforms. (D) MDS plot of CAFs and NPFs compared to human bone marrow mesenchymal stromal cells from two published datasets. Plot is based on 1000 most variable positions from 450K data. (E) Density plots showing distribution of DNA methylation at CpG islands, shores and non-CpG island regions in CAFs versus NPFs and tumour epithelial (LNCaP) versus normal prostate epithelial (PrEC) cells. WGBS methylation values are smoothed separately for each sample across 100 bp windows. (F) Scatter plot of DNA methylation in LNCaP versus PrEC cells showing global hypomethylation in LNCaP cells.

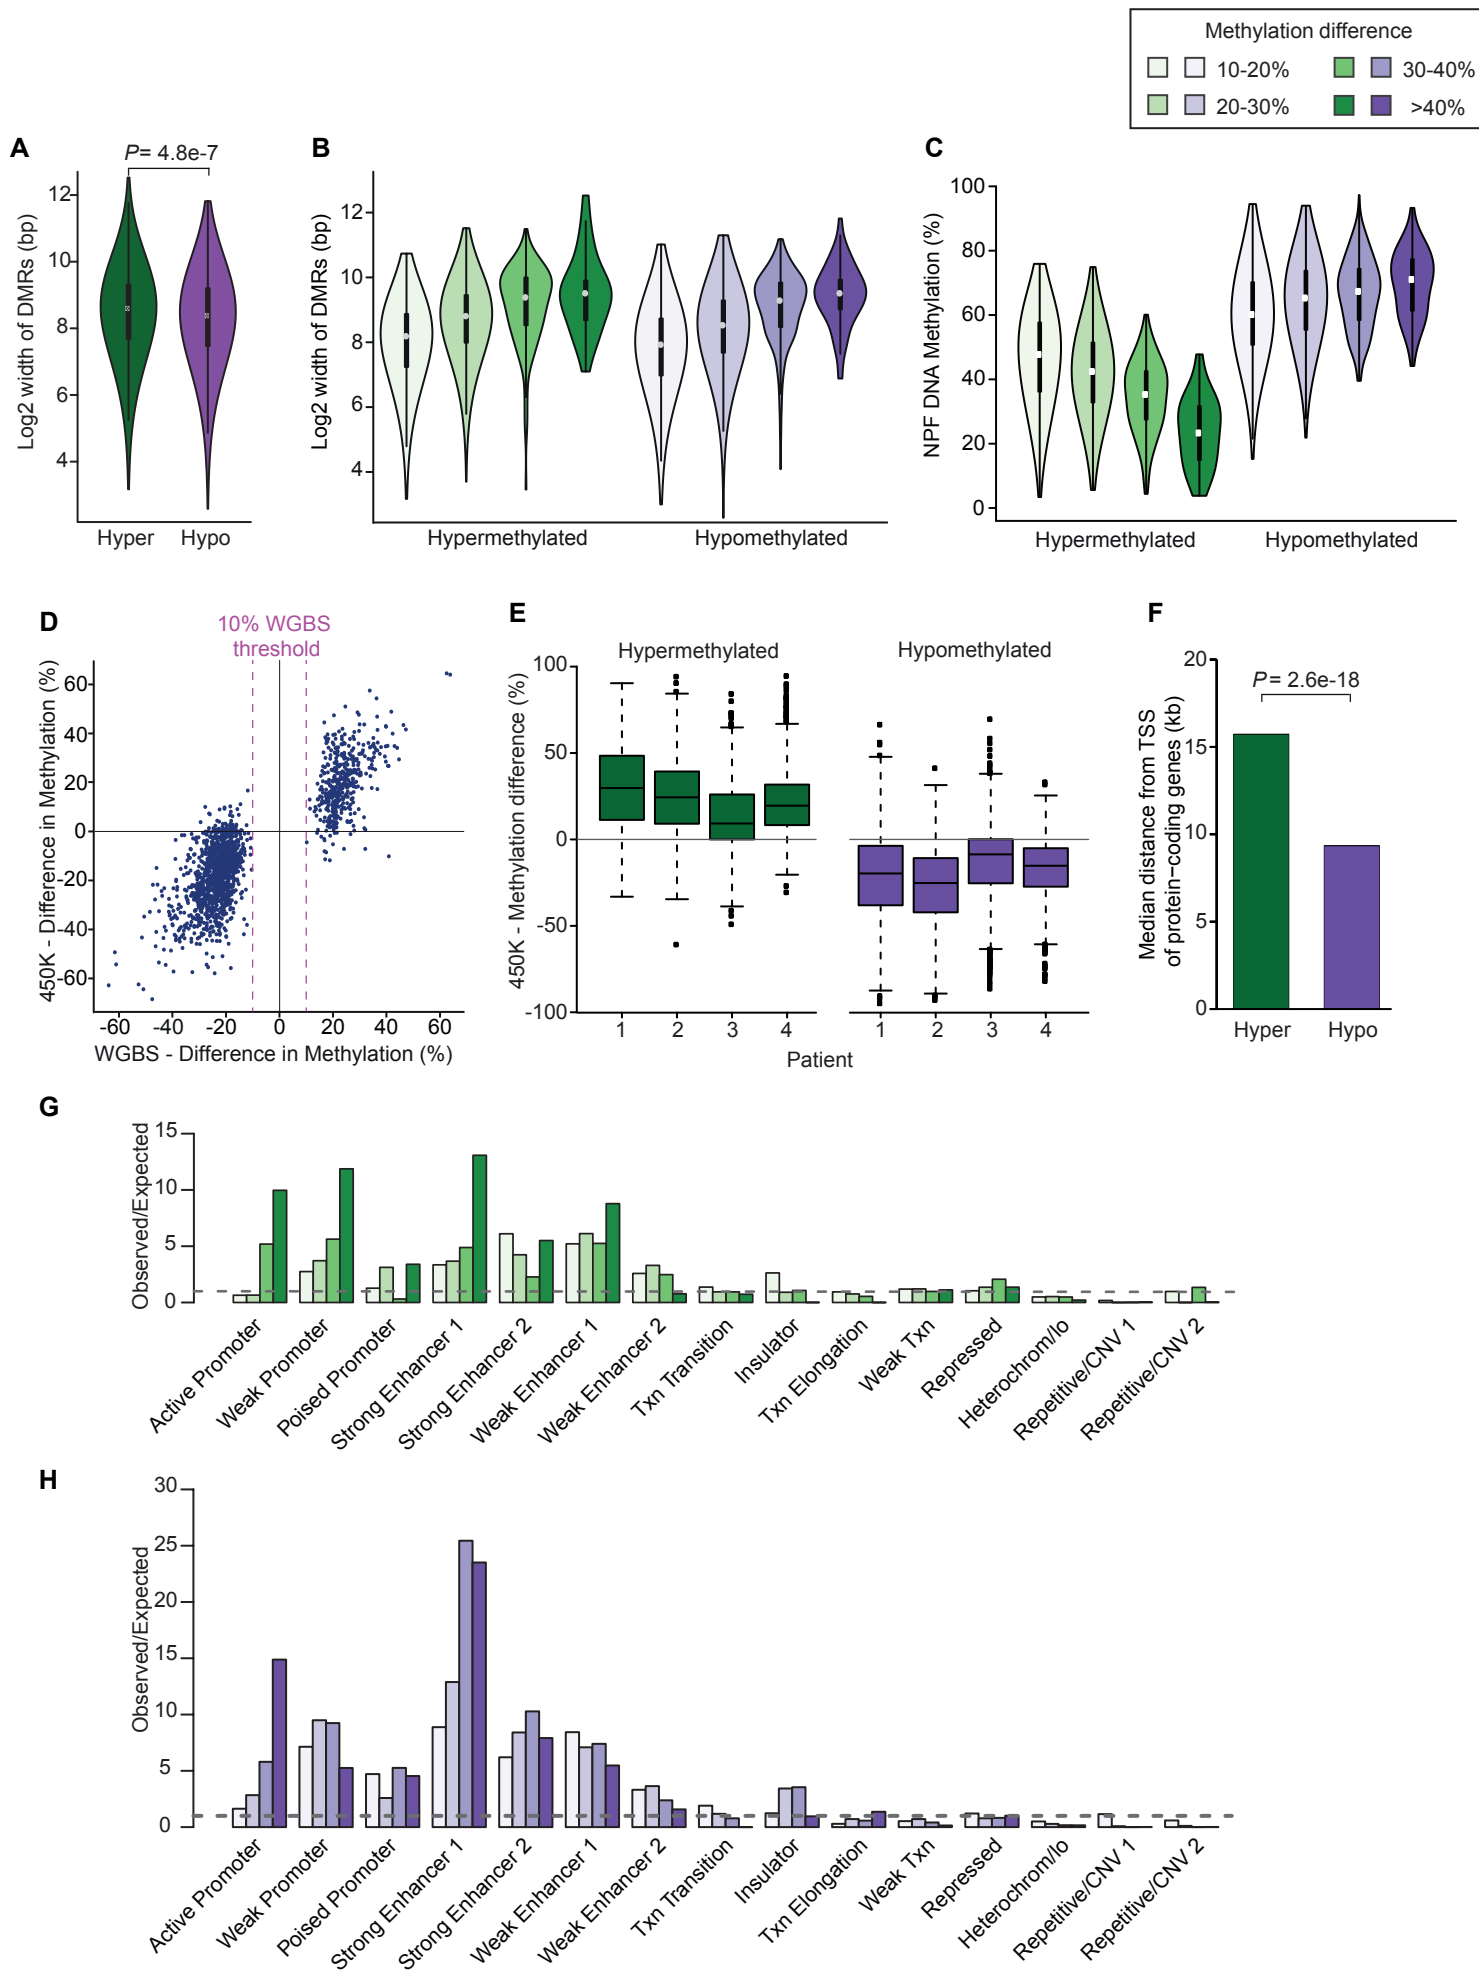



**Supplemental Fig. S2. Characteristics of CAF-NPF DMRs identified using WGBS.** (A) Violin plots of the log2 width of all DMRs. Hypermethylated (hyper, green) DMRs are significantly wider than hypomethylated (hypo, purple) DMRs ( $P=4.8 \times 10^{-7}$ , Mann-Whitney U test). (B-C) Violin plots of (B) the log2 width of DMRs and (C) NPF methylation level, grouped according to the percentage change in DNA methylation in CAFs compared to NPFs. (D) Cross-platform validation of WGBS and 450K methylation data at DMRs (Pearson's  $r=0.86$ ,  $P<2.2 \times 10^{-16}$ ), for the 27% of DMRs overlapped by probes on the 450K array. Each dot represents the mean difference in DNA methylation ( $n=4$  pairs) averaged across each DMR. (E) Boxplots showing the percentage DNA methylation difference between each patient-matched pair of CAFs and NPFs at 450K probes overlapping with WGBS hypermethylated and hypomethylated DMRs. (F) The median distance of DMRs to the transcription start site (TSS) of protein-coding genes ( $P=2.6 \times 10^{-18}$ , Mann-Whitney U test). (G-H) Bar graphs showing the observed/expected frequency of (G) hypermethylated and (H) hypomethylated CAF-NPF DMRs, subset according to the mean difference in methylation, at regulatory loci defined by ChromHMM data from normal fibroblasts. Note that ENCODE defines two types of strong enhancers, weak enhancers, and repetitive/CNV regions.

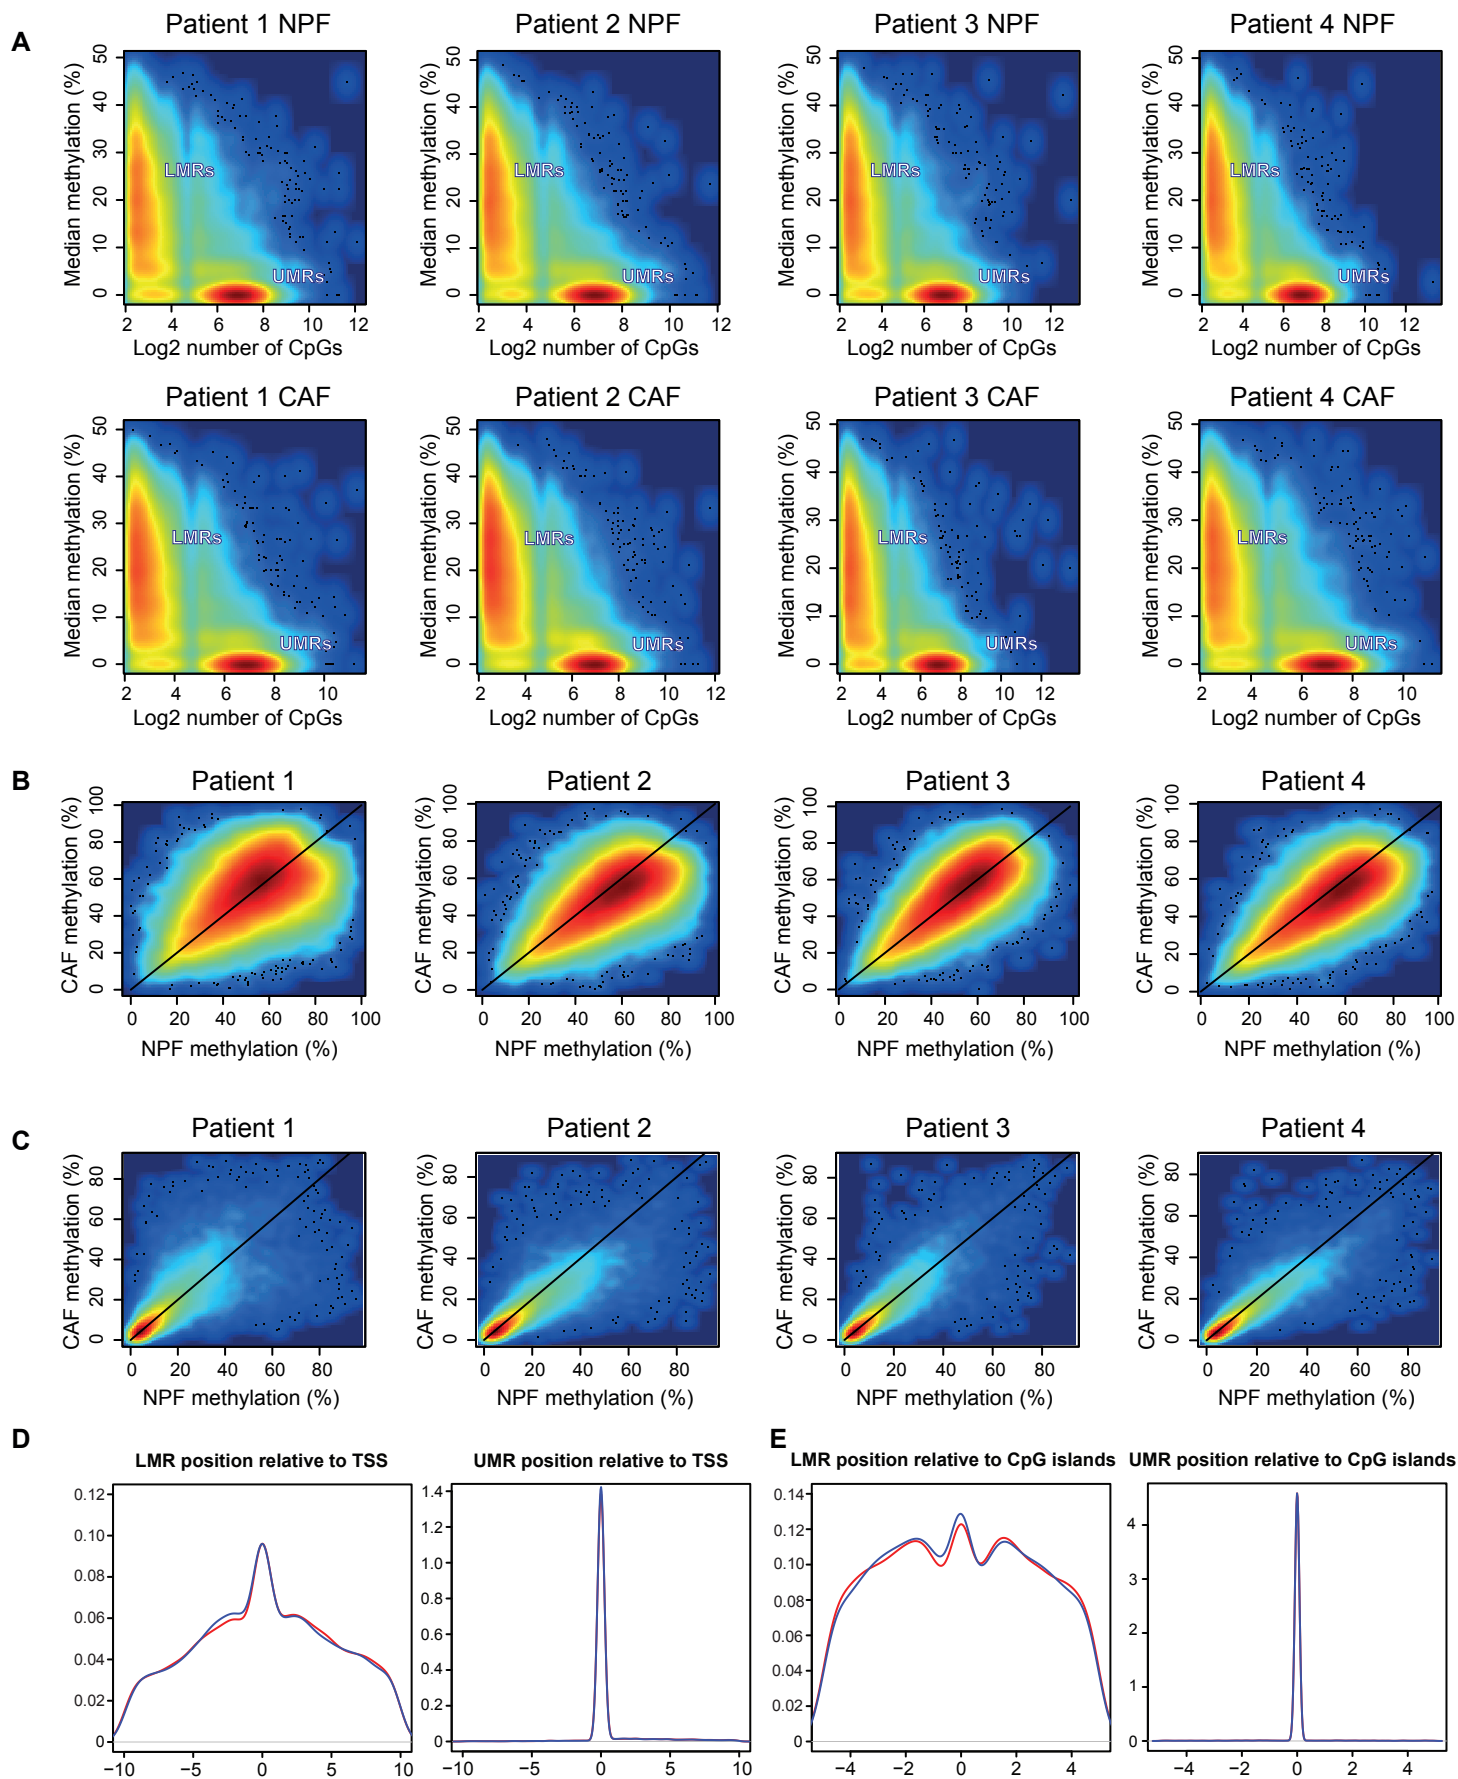

**Supplemental Fig. S3. Identification of regions of LMRs and UMRs in CAFs and NPFs with typical genomic distributions.** (A) Plots showing the log2 number of CpGs versus median methylation levels for all hypomethylated regions identified using the methylseekR computational tool. In all samples hypomethylated regions separate into two groups: CpG-poor, lowly methylated regions (LMRs) and CpG-rich, unmethylated regions (UMRs). Plots comparing (B) LMRs and (C) UMRs in each patient-matched pair of CAFs and NPFs. Plots showing the location of LMRs and UMRs in CAFs (red) and NPFs (blue) relative to (D) the transcription start site (TSS) of protein coding genes and (E) CpG islands.

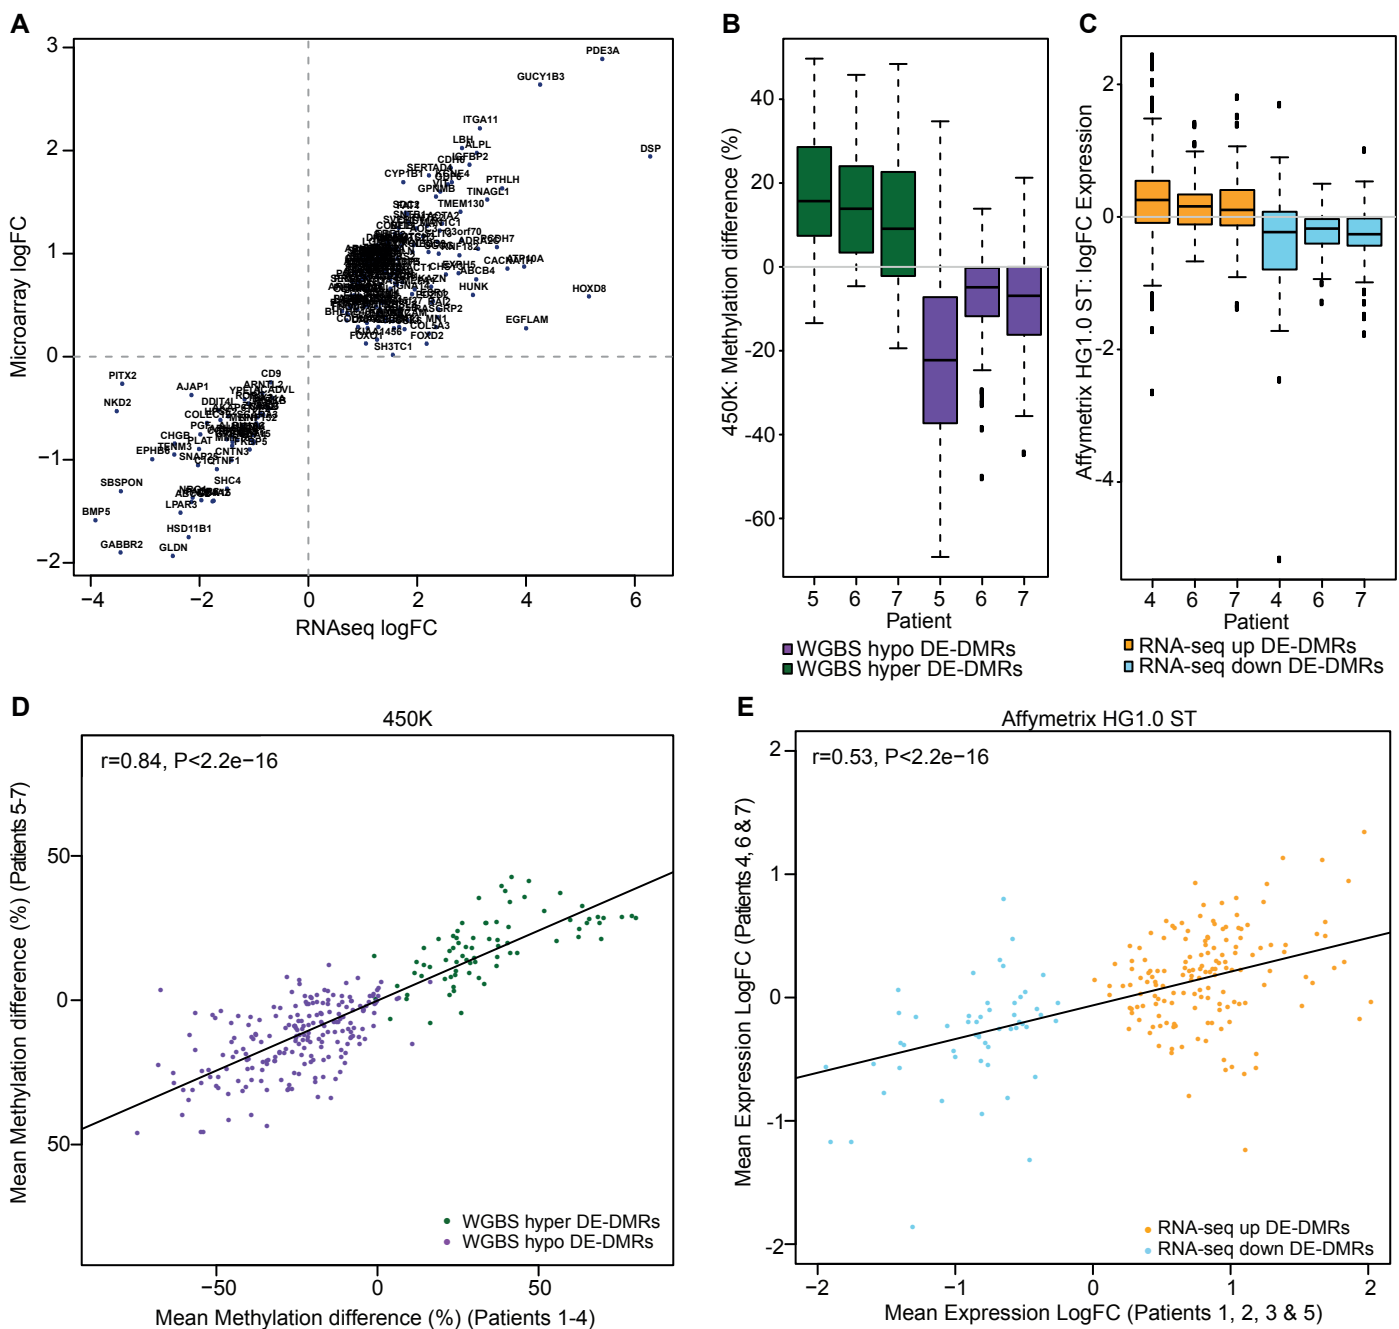

**Supplemental Fig. S4. Cross-platform and biological validation of DE-DMRs.** (A) The plot shows a strong correlation between gene expression differences measured with RNAseq and Affymetrix Human Gene 1.0ST Arrays (Pearson's  $r=0.88$ ,  $P<2.2e-16$ ). Data points represent average log fold changes (logFC) in the expression of each gene between matched CAFs and NPFs ( $n=4$  pairs). (B) Illumina 450K BeadChip data from patients 5, 6 and 7, showing DNA methylation differences in CAFs versus NPFs at the DE-DMRs previously identified with WGBS in patients 1-4. (C) Affymetrix Human gene 1.0ST data from patients 4, 6 & 7, showing expression differences in CAFs versus NPFs at the DE-DMRs previously identified with RNA-seq in patients 1-3 & 5. (D) The relationship between the mean CAF-NPF methylation difference for patients 1-4 versus patients 5-7, measured on the 450K BeadChip. (E) The relationship between mean CAF-NPF expression Log fold change (LogFC) for patients 1-3 & 5 versus patients 4, 6 & 7, measured on the Affymetrix Human gene 1.0ST microarray.

A

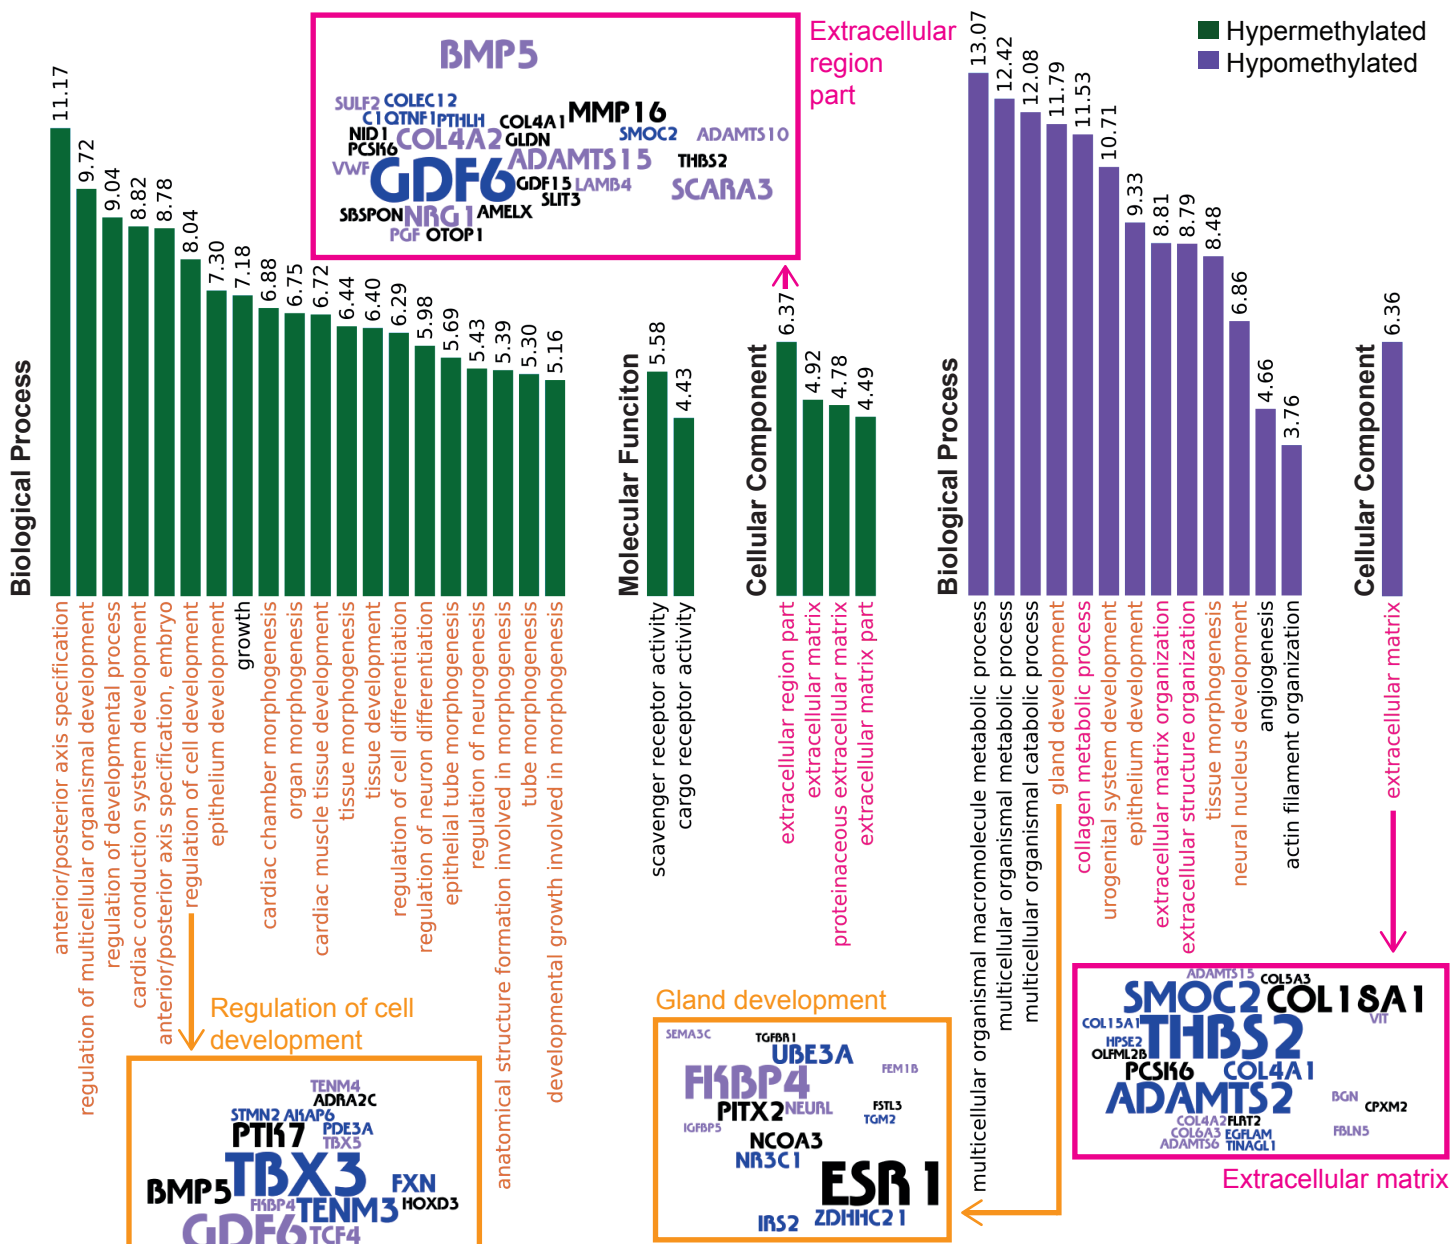

B

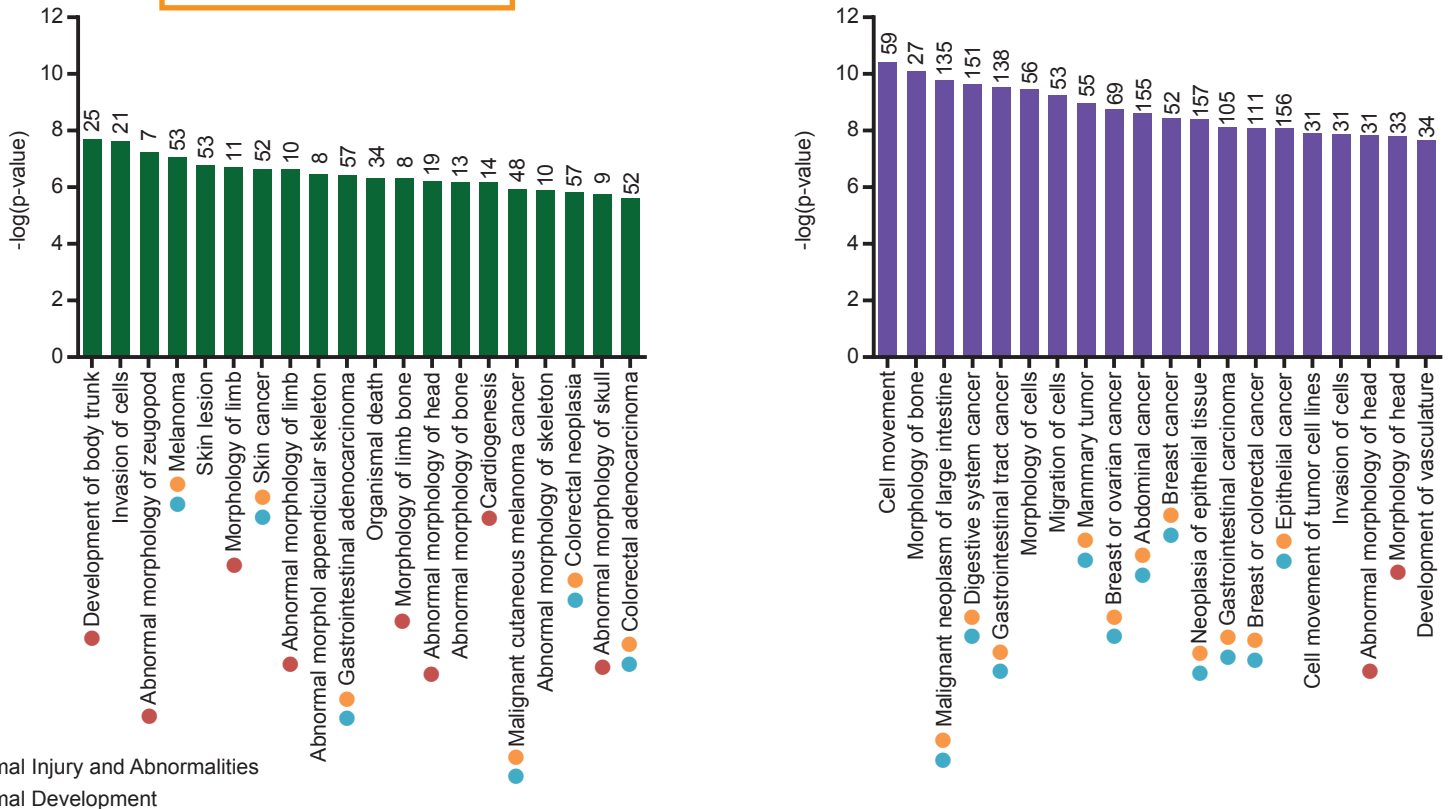

**Supplemental Fig. S5. Gene ontology and pathways analysis of DE-DMRs in CAFs compared to NPFs.** (A) Genomic regions enrichment (GREAT) analysis of DE-DMRs. Bar charts display  $-\log_{10}$  P values from the binomial test for selected categories. Categories associated with developmental processes or transcription factor binding are highlighted in orange, and those associated with extracellular cellular matrix are in pink. Word clouds show the genes comprising each of the categories, with word size proportional to the number of proximal DMRs. (B) Ingenuity Pathway Analysis of DE-DMRs. Bar graphs showing the top 20 annotations by P value for diseases and biological functions that are enriched among DE-DMRs. The height of each bar represents the  $-\log_{10}$  P value for each annotation. The number of genes associated with each annotation is also shown. Coloured circles denote annotations that belong to the top 3 categories among the dataset.

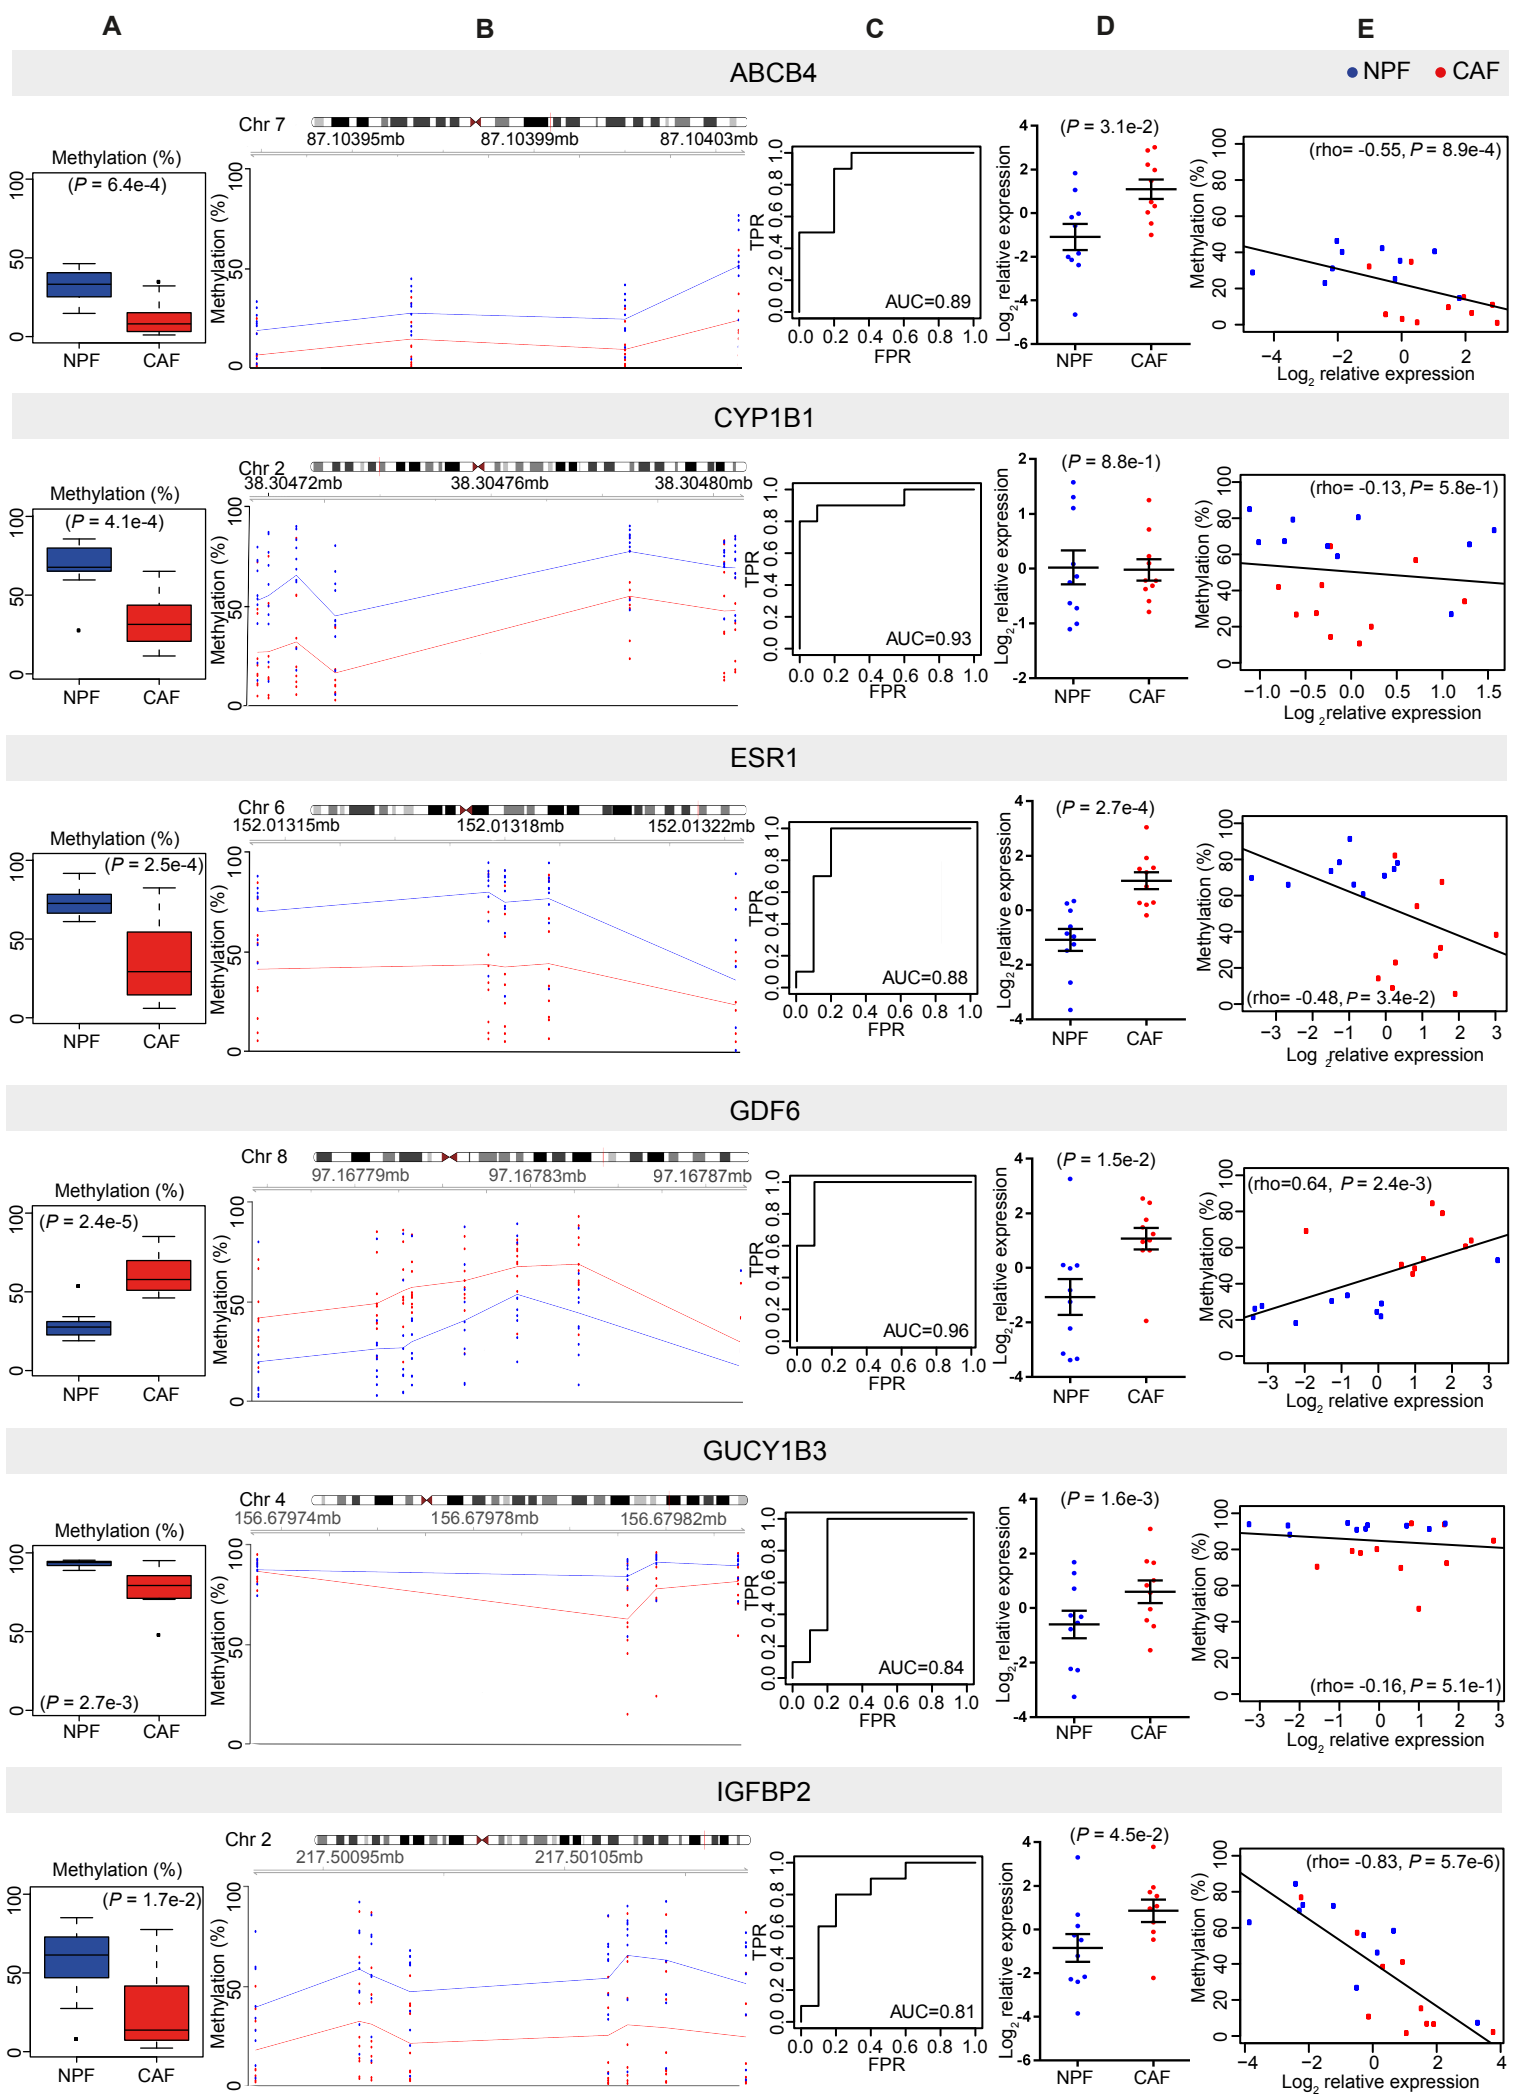

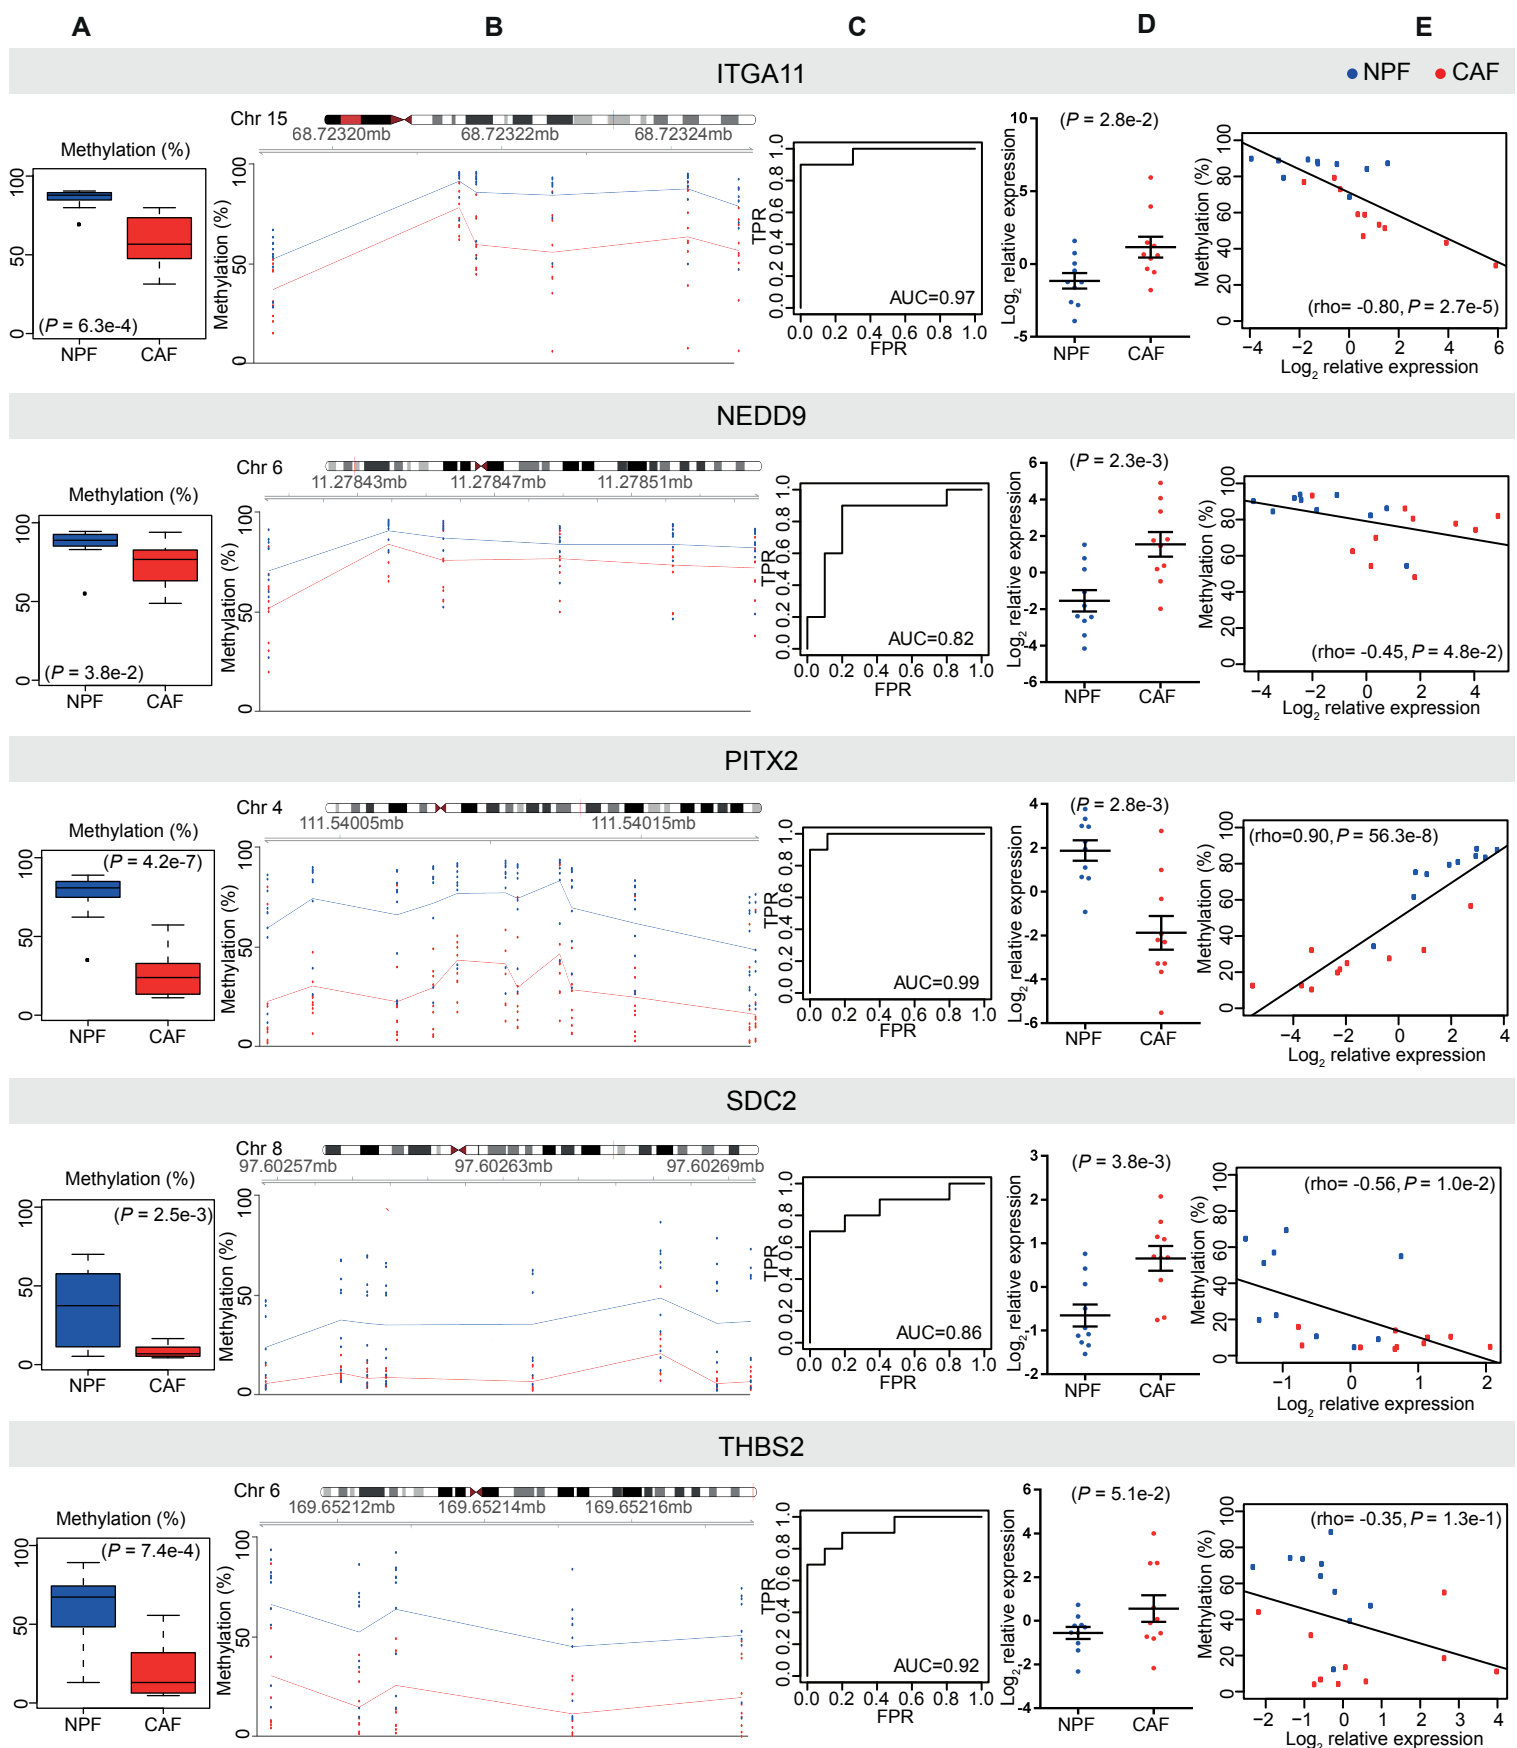

**Supplemental Fig. S6. Validation of DE-DMRs in an independent cohort of patients.** Candidate DMRs were examined with targeted bisulphite sequencing (A, B, C, E) and qPCR (D, E) in matched CAFs (red) and NPFs (blue) from patients 8-17 (n=10). (A) Boxplots show the mean percentage of DNA methylation across all CpG sites within each DE-DMR (paired one-sided t-test). (B) Line graphs of the DNA methylation of individual CpG sites within each DE-DMR (trendlines denote group mean methylation at each CpG). (C) The sensitivity and specificity of DNA methylation levels at each amplicon to distinguish between NPFs and CAFs. Receiver Operator Characteristic curves show the true positive rate (TPR, sensitivity) and false positive rate (FPR, 1-specificity) for each DMR, summarised by the Area Under the Curve. (D) qPCR data showing average log2 fold changes ( $\pm$ SEM) relative to the mean expression of each gene in all fibroblasts (paired one-sided t-tests). (E) Scatter plots comparing the mean percentage of DNA methylation (across all CpGs) to relative gene expression for each DE-DMR (Spearman's test). Each point represents an individual sample.



A

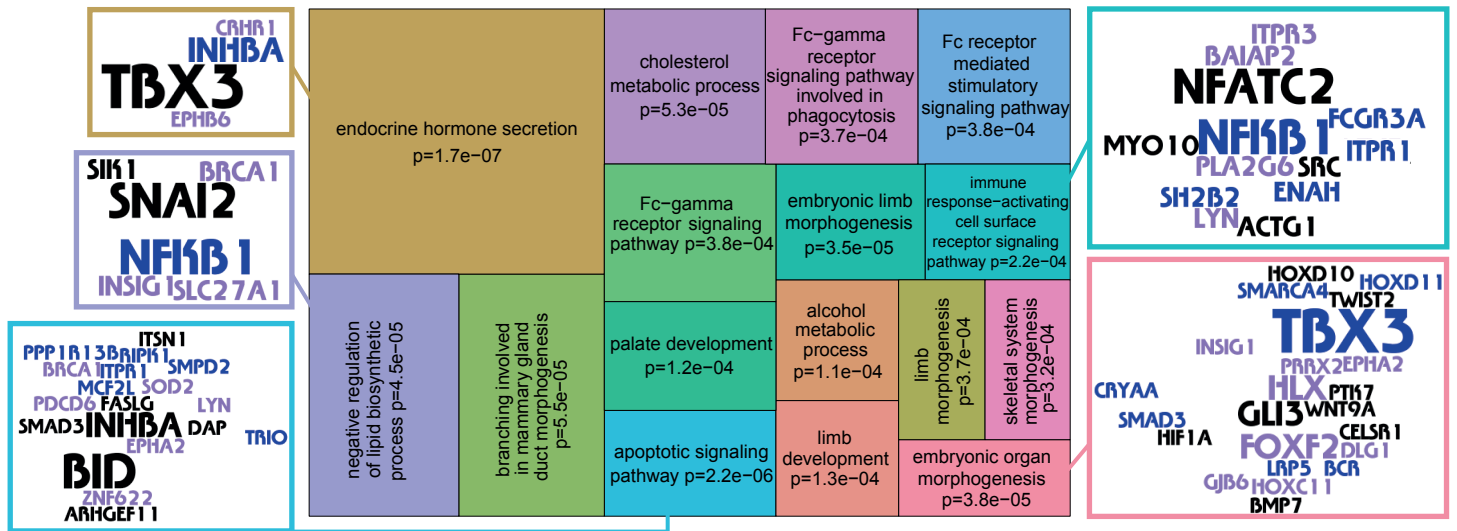

B

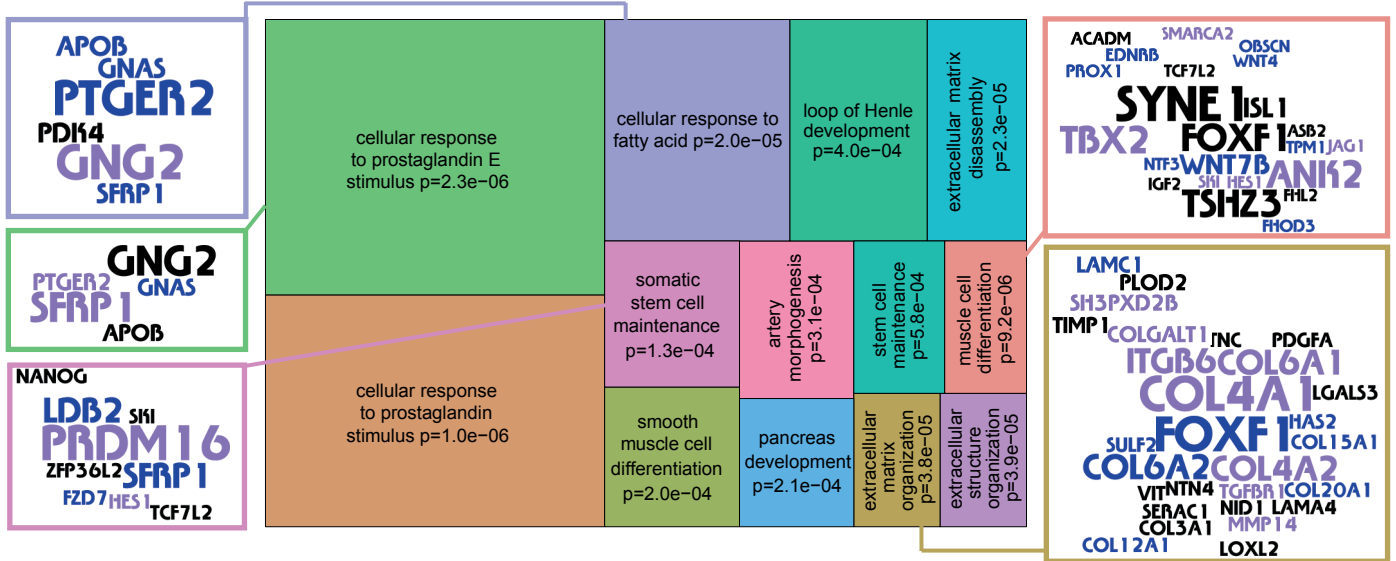

C

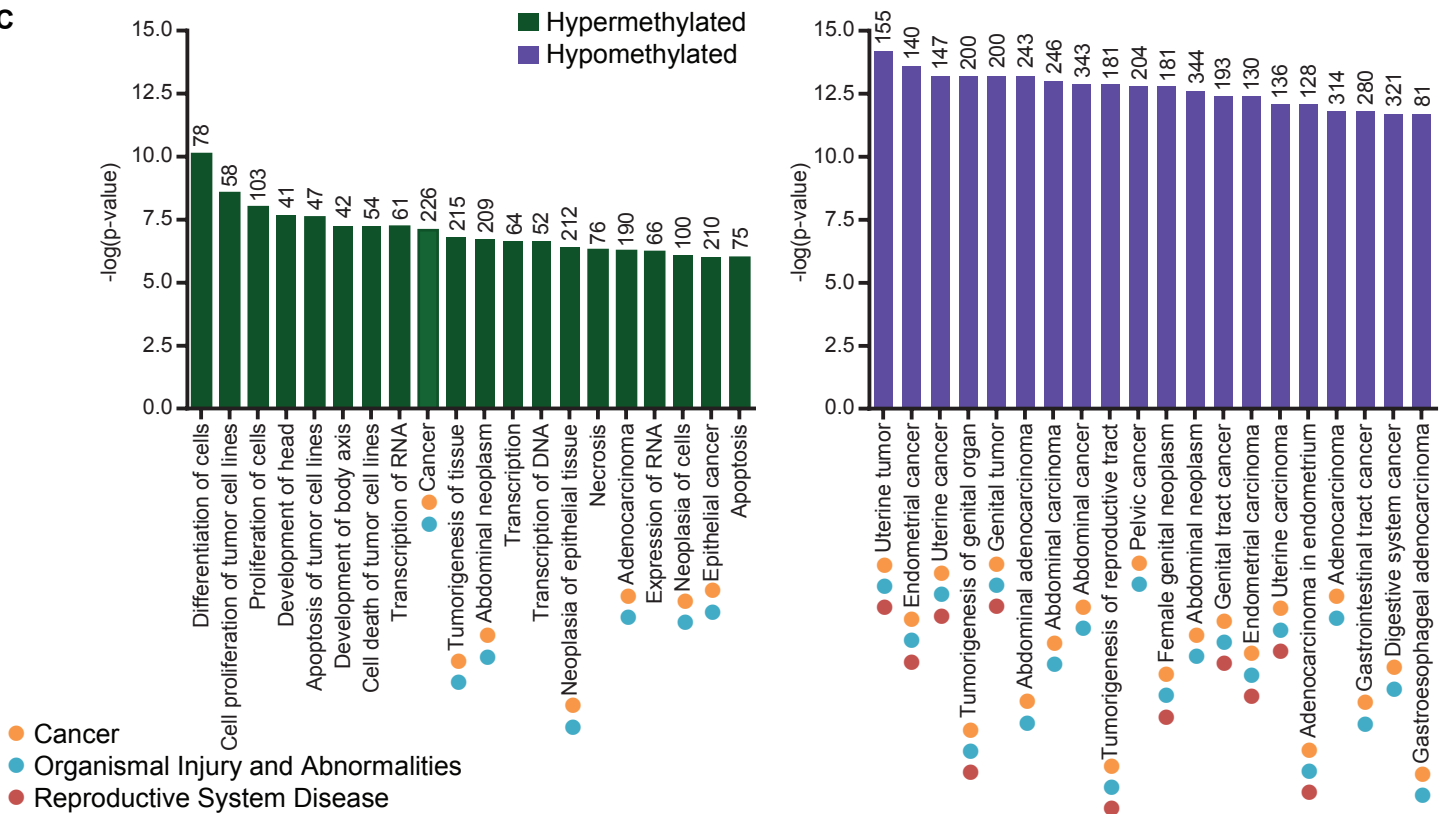



**Supplemental Fig. S7. Gene ontology and pathways analysis of tsDMRs in CAFs compared to NPFs.** Genomic regions enrichment (GREAT) analysis of (A) hypermethylated and (B) hypomethylated tsDMRs showing enriched biological processes with raw P-values from the binomial test. Word clouds show the genes comprising categories, with word size proportional to the number of proximal DMRs. (C) Ingenuity Pathway Analysis of tsDMRs. Bar graphs showing the top 20 annotations by P value for diseases and biological functions that are enriched among tsDMRs. The height of each bar represents the  $-\log_{10}$  P value for each annotation. The number of genes associated with each annotation is also shown. Coloured circles denote annotations that belong to the top 3 categories among the dataset.

# EHF

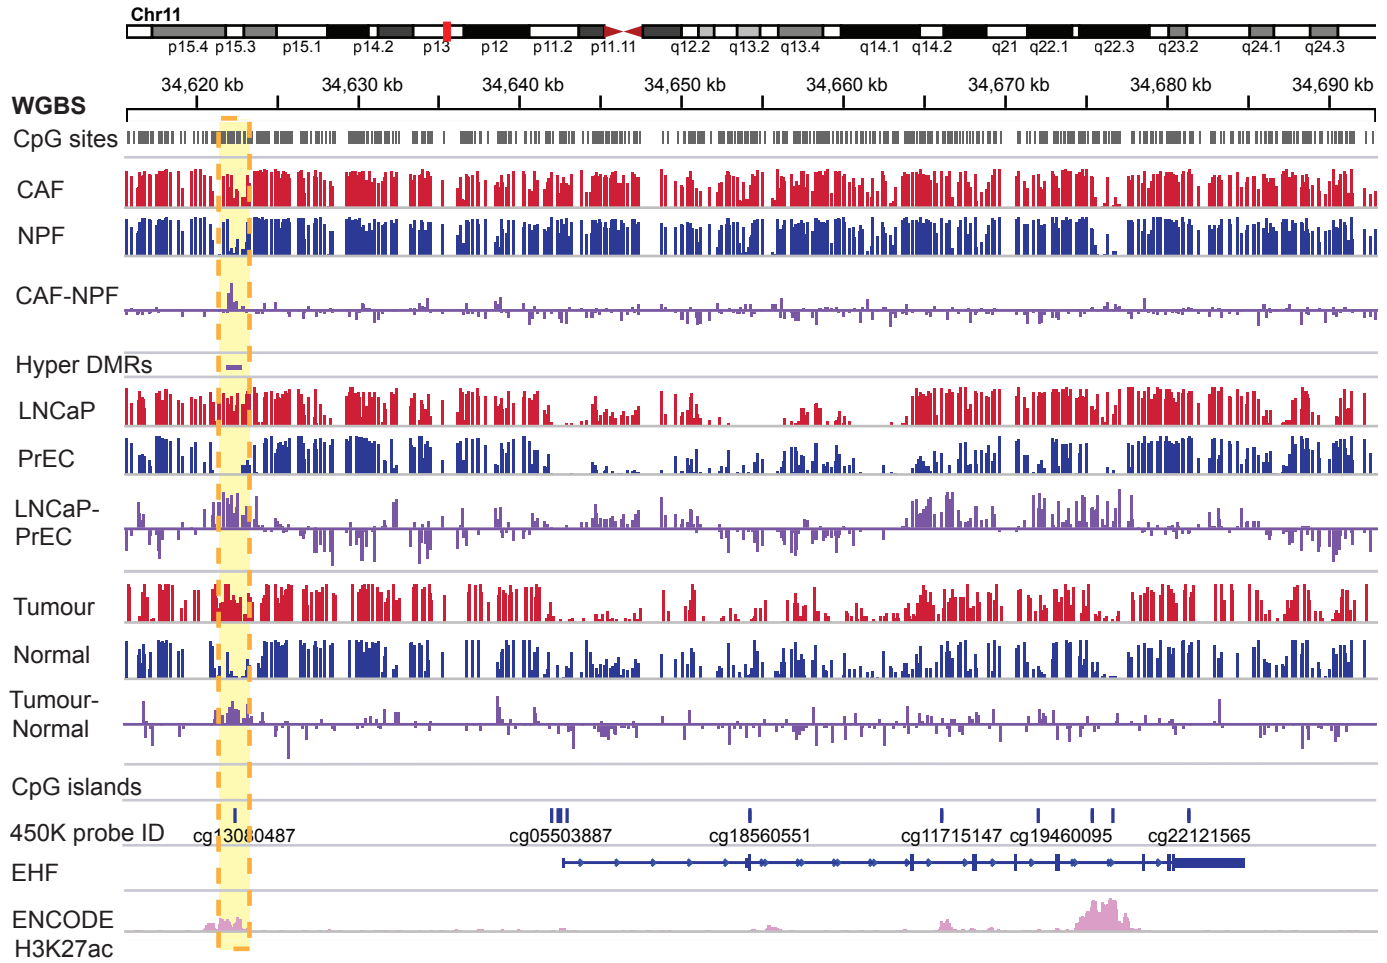

TCGA

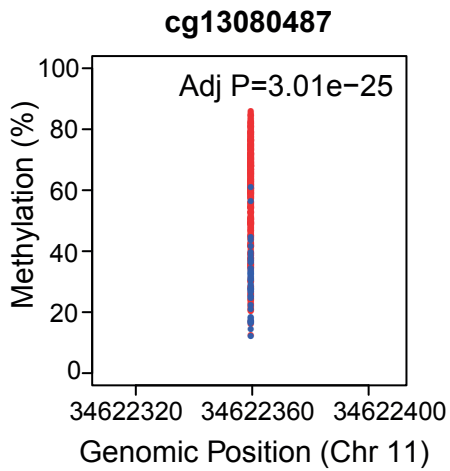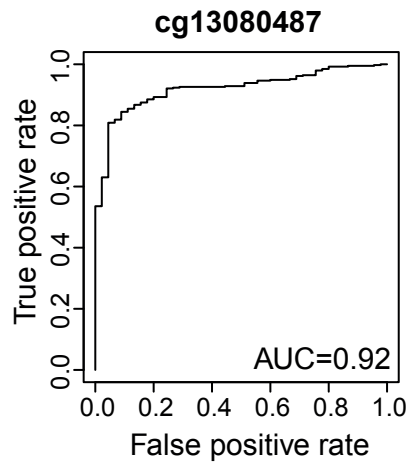

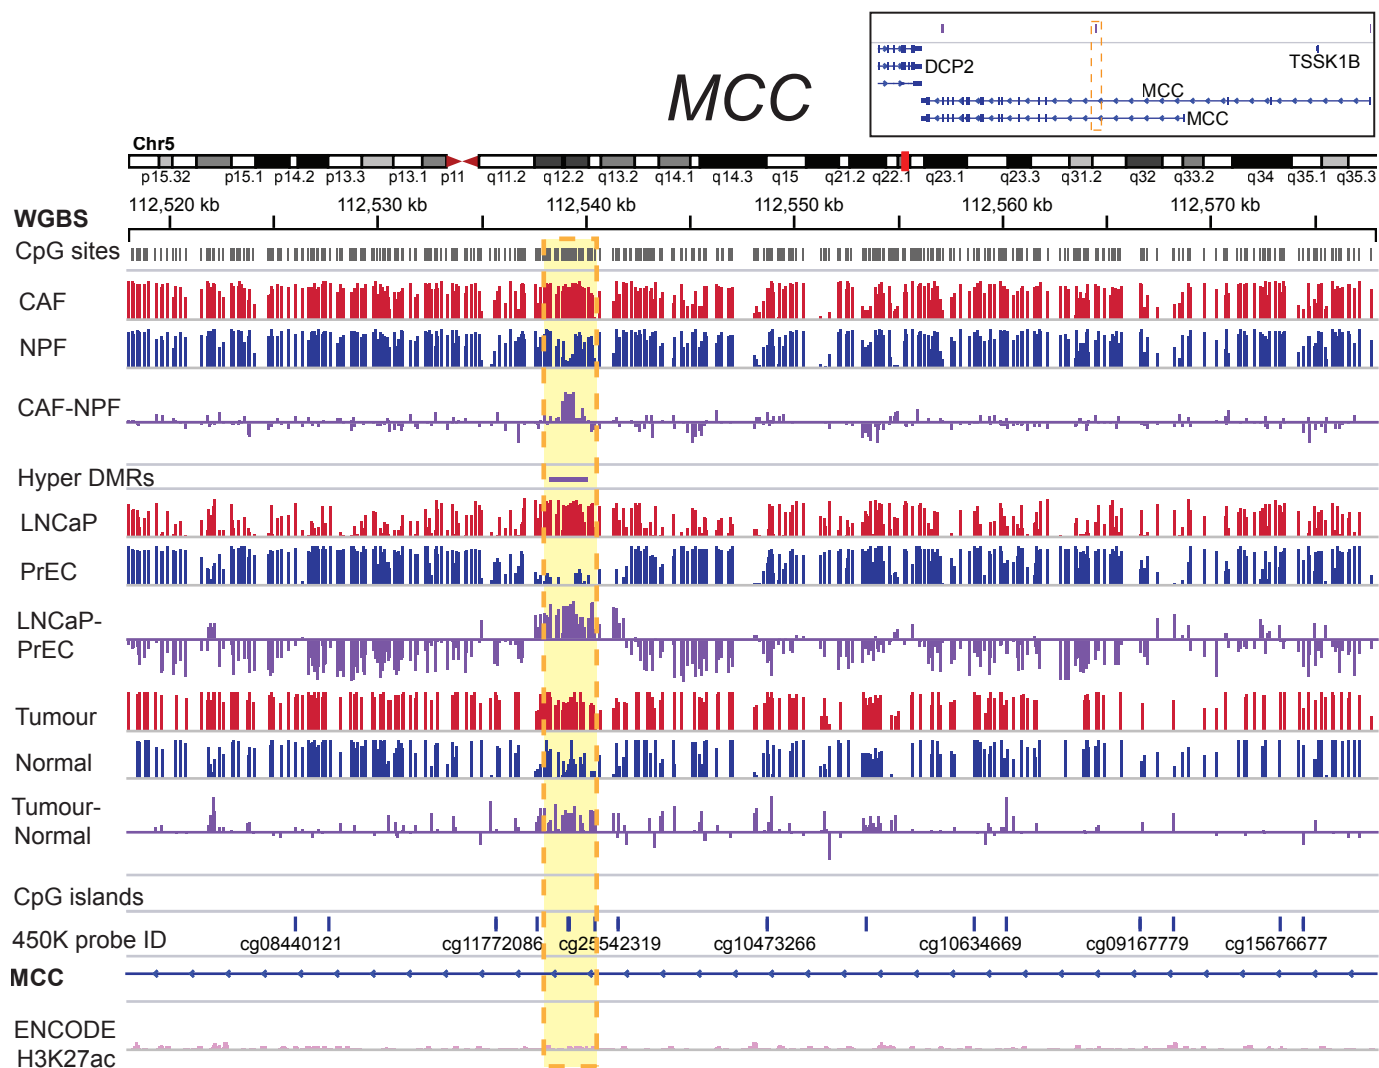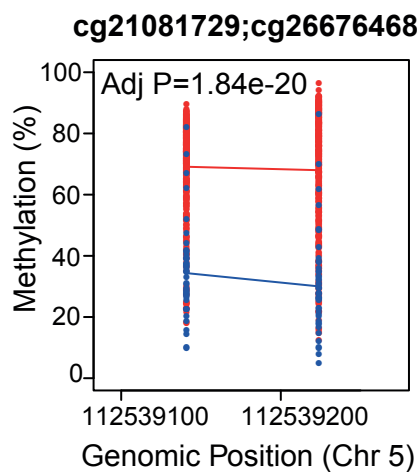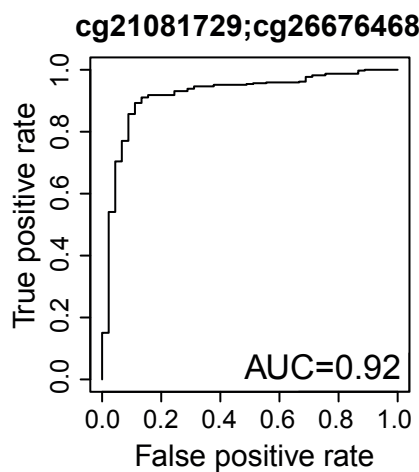

# STEAP2

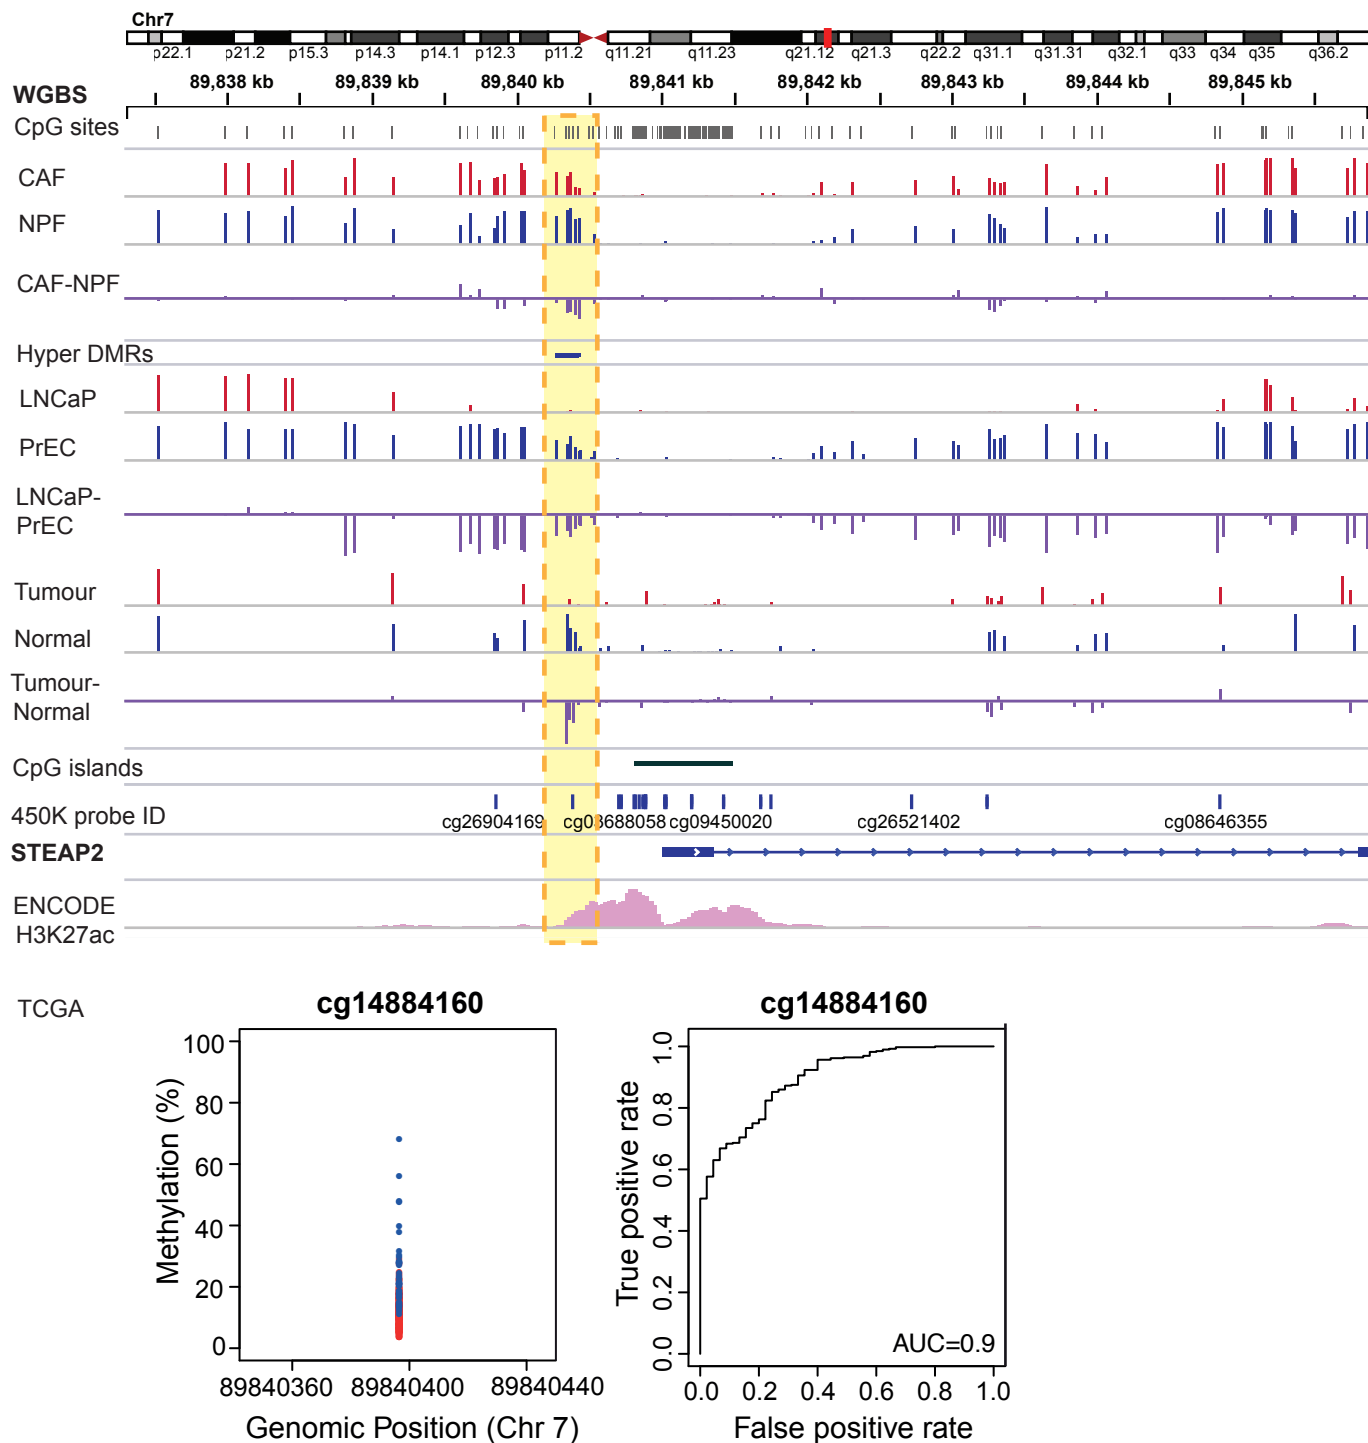

**Supplemental Fig. S8. Tumour-specific DMRs in CAFs and cancer cells.** Summary of the DNA methylation profiles of DMRs in the EHF, MCC and STEAP2 gene. WGBS data for CAFs versus NPFs (n=4), LNCaP versus PrEC cells, and tumour versus matched normal clinical samples (n=4 patients) are shown. Yellow boxes highlight the tsDMRs. Corresponding DNA methylation levels are shown for TCGA samples (tumour = red, normal = blue) based on 450K probes within the tsDMRs. The ROC curves show the ability of the 450K data to discriminate between matched cancer versus normal TCGA tissues.
