# Supplementary material for: Enduring epigenetic landmarks define the cancer microenvironment
Source: HighWire-hosted journal article supplement (doi:10.1101/gr.229070.117), 2018-04-12
Supplement: Supplemental_Methods.docx [file Supplemental_Methods.docx]

**Supplemental Methods**

**Patient Tissue**

To isolate primary fibroblasts, whole human radical prostatectomy specimens were collected with informed consent and human ethics approval from Monash University (2004/145), Cabrini Hospital (03-14-04-08) and Epworth Hospital (53611). For each specimen, the location of the tumour was determined using biopsy reports and palpation. The prostate was cut to expose the tumour and frozen sections were performed to confirm that the area contained approximately 80% prostate cancer. 200-1000 mg of tissue was then dissected from this site. At the same time, benign tissue was obtained from a separate region of the same prostate and frozen sections were used to confirm the lack of tumour cells. The prostate gland was then reassembled and processed for routine histopathology.

For WGBS, four patients who had undergone surgery for localised prostate cancer, and subsequently died of prostate cancer, were identified from the Garvan Institute/St Vincent's Prostate Cancer biobank with informed consent and human ethics approval (SVH File Number 12/231). Formalin-fixed, paraffin-embedded radical prostatectomy blocks were retrieved and H&E sections reviewed by a specialist prostate cancer pathologist. Five 2 mm core biopsies were taken from 1) each of the dominant nodule in areas of >90% cancer cell density, and 2) adjacent benign prostate tissue.

**Cell Culture**

Primary cultures of NPFs and CAFs from matched non-malignant and cancer regions of radical prostatectomy tissue, respectively, were established and validated as previously described (Clark et al. 2013; Lawrence et al. 2013). Fresh patient tissue was chopped into small pieces, approximately 2 mm3, and 2-3 pieces were retained from each sample and fixed in formalin. The remaining tissue was digested overnight at 37°C in RPMI containing 10% fetal calf serum (FCS), 25 mM HEPES, 100 U/mL penicillin, 100 mg/mL streptomycin, 0.5 mg/mL fungizone, 100 mg/mL gentamicin, 225 U/mL Collagenase Type I and 125 U/mL Hyaluronidase Type II (Sigma Aldrich) as previously described (Lawrence et al. 2013). Cell suspensions were seeded in RPMI containing 5% FCS, penicillin/streptomycin, 1 nM testosterone (Sigma Aldrich) and 10 ng/mL bFGF (Millipore), a medium that selects for fibroblasts compared to other prostatic cell types. Cells were grown at 37°C in a humidified incubator with 5% O2 and 5% CO2. NPF and CAF cells grew successfully for all patient specimens and were used between passages 2-6. All downstream analyses for each patient pair (CAF and NPF) were performed in parallel.

LNCaP cells (American Type Culture Collection) were maintained in T-medium with 10% FCS, 2mM L-Glutamine and Penicillin/Streptomycin (50 Units/50 μg). PrEC cells (Cambrex Bio Science) were maintained in PrEBM medium supplemented with SingleQuots growth supplements (Lonza). Both epithelial cell lines were grown at 37°C with 5% CO2. All fibroblast and epithelial cell cultures were confirmed to be free of mycoplasma contamination.

**Validation of Prostatic Fibroblasts**

Fibroblasts were selected for this study where patient-matched CAFs and NPFs were both available and passed three previously described validation steps (Clark et al. 2013; Lawrence et al. 2013; Niranjan et al. 2013). Firstly, a pathologist examined the fixed pieces of tissue retained from each specimen to confirm that NPFs were derived from benign tissue and that CAFs were from tumour tissue. The Gleason score of tumour tissues was also noted. Secondly, immunocytochemistry for phenotypic markers (vimentin, mouse, LN-6, Sigma-Aldrich; high molecular weight cytokeratin, mouse, 34βE12, Dako; low molecular weight cytokeratin, mouse, 5D3, Leica) markers was used to confirm that NPFs and CAFs were pure cultures of fibroblasts lacking contaminating epithelial cells. Finally, the classical tissue recombination assay with BPH-1 cells was used to verify that the CAFs were pro-tumourigenic, but the NPFs were not (Olumi et al. 1999; Taylor et al. 2012; Lawrence et al. 2013). Grafts were implanted under the kidney capsule of 6-8 week old male NOD-SCID mice with testosterone implants for 8 weeks as previously described (Lawrence et al. 2013). The experiments were performed according to Monash University Animal ethics approvals. The assay was performed in triplicate for each cell line and the results were scored by an Uropathologist based on the previously reported features of tissue recombination assays (Olumi et al. 1999; Taylor et al. 2012). Briefly, grafts were defined as tumours if the BPH-1 cells formed poorly differentiated masses, often with small nests of cells, with prominent nuclear changes (nucleoli, mitotic figures, increased nuclear:cytoplasmic ratio), minimal keratinization and occasional invasion of cells towards the host kidney. In contrast, grafts were scored as benign when the BPH-1 cells formed well differentiated masses, with minimal nuclear changes, abundant keratinization and no evidence of invasion.

**Nucleic acid extraction**

DNA was extracted from CAF and NPF samples with the DNeasy kit (Qiagen) with on-column RNase A digestion. The QIAamp Mini kit (Qiagen) was used for DNA extractions from LNCaP and PrEC samples, while the AllPrep DNA/RNA kit (Qiagen) was used for patient specimens.

RNA was extracted from CAF and NPF samples using the RNeasy kit (Qiagen) with on-column DNase I digestion or using TRIzol followed by column clean-up with the RNeasy kit. RNA concentration and integrity were assessed on an Agilent Bioanalyzer 2100 using the Eukaryote Total RNA Nano Chip (Agilent).

**Whole-genome bisulphite sequencing library preparation**

For library preparation using the Illumina Paired-end DNA Sample Prep Kit (Illumina), DNA (1 ug) from four patient-matched CAF-NPF pairs (eight samples), and LNCaP and PrEC cell lines, was spiked with 0.5% unmethylated lambda DNA (Promega) in a final volume of 50-65 μL. DNA was sheared to 150-300 bp by sonication with a Covaris S2. Library preparation was performed according to the manufacturer’s protocol - fragments were end-repaired and adenylated before ligation of Illumina TruSeq adaptors. Gel size selection (260-330 bp) was used to purify and size select the ligated DNA, using Qiagen Gel extraction kit (Qiagen, part #28704) and DNA was eluted in 20 μL H2O. Bisulphite treatment was then carried out as previously described (Clark et al. 2006), with the bisulphite reaction being performed for 4 hrs at 55°C. After bisulphite cleanup the DNA pellet was resuspended in 50 μl H2O. The adaptor-ligated bisulphite-treated DNA was enriched by performing 5 independent PCR reactions for 10 cycles using PfuTurboCx Hotstart DNA polymerase (Stratagene) in a volume of 50 μl per PCR reaction. The 5 independent PCRs were pooled together, cleaned up using the MinElute PCR purification kit and eluted in 20 μL Qiagen EB buffer.

For library preparation for patient specimens, DNA (250 ng) from FFPE tumour (n=4) and matched adjacent normal tissue (n=4) was bisulphite treated using the EZ DNA methylation Gold kit (Zymo Research) following the manufacturer’s protocol. Whole genome bisulphite sequencing libraries were prepared using the EpiGnome Methyl-Seq kit (Epicentre) according to the manufacturer’s protocol. Briefly, the single-stranded bisulphite-treated DNA was randomly primed and tagged to generate double-stranded DNA molecules with sequence tags at both ends. The tagged DNA was cleaned up using AMPure XP Beads, eluted in 22.5 μL of nuclease-free water and then enriched by performing PCR for 10 cycles in a volume of 50 μL per reaction. PCR products were cleaned up using AMPure XP Beads and eluted in 20 μL of nuclease-free water.

**WGBS Library quality control and sequencing**

For CAF, NPF, LNCaP and PrEC cells, library quality was assessed with the Agilent 2100 Bioanalyzer using the High-sensitivity DNA kit (Agilent, CA, USA). DNA was quantified using the KAPA Library Quantification kit by quantitative PCR (KAPA Biosystems). One lane of the Illumina HiSeq 2500 platform was used for paired-end 100 bp sequencing for each library using TruSeq v3 cluster kits and SBS kits. Each patient NPF-CAF pair were sequenced on the same high output run to minimize batch effects.

Libraries from patient tumour and normal specimens were analysed with 70 bp paired end sequencing on the Illumina HiSeq 2500 platform. Six samples were multiplexed across two lanes using the TruSeq Rapid v1 paired-end cluster kit and SBS kits. Sequencing was performed four times to gain sufficient coverage.

**WGBS data processing and quality control**

For CAF and NPF samples, bisulphite reads were aligned to the human genome using Bisulphite Tools (version 1.2) (http://github.com/astatham/Bisulphite_tools). Briefly, adaptor sequences and poor quality bases were removed using Trimgalore v0.2.8 (http://www.bioinformatics.babraham.ac.uk/projects/trim_galore) in paired-end mode with default parameters. Bismark v0.8.3 (Krueger and Andrews 2011) was then used to align reads to hg19 using the parameters “-p 4 –bowtie2 –X 1000 –unmapped –ambiguous –gzip –bam”. PCR duplicates were removed using Picard v1.91 (http://broadinstitute.github.io/picard). Count tables of the number of methylated and unmethylated bases sequenced at each CpG site in the genome were constructed using bismark_methylation_extractor with the parameters “-p –no_overlap –ignore_r2 4 –comprehensive –merge_non_CpG –bedgraph –counts –report –gzip –buffer_size 20G”. All libraries passed basic quality control checks with >80% of read pairs aligning uniquely, <2.5% duplication rate and >98.5% bisulphite conversion. WGBS multidimensional scaling plots were generated using ‘mdsPlot’ function in the *minfi* Bioconductor package (version 1.12.0) (Aryee et al. 2014).

For LNCaP and PrEC samples, adaptor sequences and poor quality bases were removed using Trimgalore v0.2.8 (http://www.bioinformatics.babraham.ac.uk/projects/trim_galore) in paired-end mode with default parameters. Reads were aligned to hg19 using bwa-meth (http://github.com/brentp/bwa-meth) (Pedersen et al. 2014) with default parameters. PCR duplicates were removed using Picard v1.91 (http://broadinstitute.github.io/picard). Count tables of the number of methylated and unmethylated bases sequenced at each CpG site in the genome were constructed using the ‘tabulate’ module of bwa-meth and BisSNP-0.82.2 (Liu et al. 2012) with default parameters. For data presented in this study the mean methylation ratio was calculated for a) all tumour samples and b) all normal samples in the candidate genes of interest.

Plots of methylation distribution by CpG context were created using the ‘methWindowRatios’ and ‘methDensityPlot’ function implemented in the R package aaRon (https://github.com/astatham/aaRon). For this analysis, a bed-formatted annotation file of CpG islands was downloaded from UCSC hg19 using the rtracklayer Bioconductor package (Lawrence et al. 2009). CpG shores were defined as the regions 2000 bp either side of each CpG island, and all genomic regions >2000 bp distant were defined as non-CpG.

**WGBS Statistical analysis**

The R package bsseq (Hansen et al. 2012) was used to identify differentially methylated regions (DMRs) between the CAFs and NPFs. Firstly, methylation across the genome was smoothed with the ‘BSmooth’ function using the parameters “ns=70, h=1000”, then CpG sites with <2x sequencing coverage in >2 samples in either sample group were removed. T-statistics were then calculated using BSmooth.tstat with parameters “estimate.var=paired, local.correct=TRUE” and DMRs called with dmrFinder using a symmetrical cut-off of 3. These DMRs were then filtered to contain a minimum of 3 CpG sites and to display a minimum absolute methylation mean difference of 10%. CAF and NPF UMRs and LMRs were identified and plotted using the MethylSeekR Bioconductor package (Burger et al. 2013), with the parameters 'meth.cutoff=0.5, nCpG.cutoff=5' and PMD filtration turned on. Resulting DMRs, UMRs and LMRs were annotated for overlap and proximity with genetic features using the ‘annotateRegions’ function implemented in the R package aaRon (https://github.com/astatham/aaRon).

**Enrichment analysis for chromatin states**

A bed-formatted annotation file of chromatin states for a normal human lung fibroblast (NHLF) cell line was downloaded through UCSC Genome Browser (Ernst et al. 2011) (http://genome.ucsc.edu/cgi-bin/hgTrackUi?g=wgEncodeBroadHmm). These data were chosen as the most representative set of fibroblast regulatory regions currently available. A bed-formatted background file was created containing all the genomic regions tested in our identification of CAF-NPF WGBS DMRs with the bsseq dmrFinder (see above for details). These background regions were then filtered to contain a minimum of 3 CpG sites (corresponding to the filter applied to the DMRs). The Genomic Association Tester (GAT) simulation framework was used to assess enrichment of WGBS DMRs in each chromatin state (Heger et al. 2013). Briefly the base overlap between WGBS DMRs and each chromatin state was tested against the base overlap between the background regions and each chromatin state. The expected overlap was computed by randomizing the locations of the WGBS DMRs among the background regions. From 10,000 randomizations, the procedure computed the expected overlap and an empirical p-value and FDR rate.

**Microarray genome-wide DNA methylation analysis**

DNA (500 ng) from seven patient-matched CAF-NPF pairs (14 samples, including the 8 samples profiled using WGBS) was treated with sodium bisulphite using the EZ-96 DNA methylation kit (Zymo Research, CA, USA). DNA methylation was quantified using the Illumina Infinium HumanMethylation450 (450K) BeadChip (Illumina, CA, USA) run on an Illumina HiScan System (Illumina, CA, USA) using the manufacturer’s standard protocol.

Raw intensity data (IDAT) files were imported into the R environment (version 3.1.1) (R Development Core Team 2010) using the *minfi* package (version 1.12.0) (Aryee et al. 2014). Data quality and pairing of patient-matched samples was checked with plots derived from control probes on the array. Data was divided into 2 datasets: dataset 1 containing the 8 samples (4 pairs) with matched WGBS data, and dataset 2 containing 6 additional samples (3 pairs). The datasets were processed separately using functional normalisation *(preprocessFunnorm)* with background and dye bias correction (Triche et al. 2013; Fortin et al. 2014). Poor quality probes with a detection p-value >0.05 or bead count <3 in at least one sample were removed. Next, to reduce the risk of false discoveries we removed probes that mapped to multiple locations or repeat regions (Naeem et al. 2014). The resulting datasets comprised 409,693 CpG sites and 410,970 CpG sites, for datasets 1 and 2 respectively. β values were calculated from unmethylated (U) and methylated (M) signal [M/(U + M + 100)] and ranged from 0 to 1 (0 to 100% methylation).

Multidimensional scaling plots of 450K dataset 1 and two public bone marrow fibroblast datasets were generated using ‘mdsPlot’ function in the *minfi* Bioconductor package (version 1.12.0) (Aryee et al. 2014). For this, bone marrow fibroblast datasets were downloaded from the GEO website: GSE41933 (Reinisch et al. 2015) and GSE34688 (Shao et al. 2013; Frobel et al. 2014) using the ‘getGEO’ function in the *GEOquery* Bioconductor package (version 2.40.0). Beta values were extracted and quantile normalized, and probes removed if they mapped to multiple locations, repeat regions or overlapping SNPs, insertions or deletions according to (Naeem et al. 2014).

**TCGA microarray genome-wide DNA methylation**

Raw IDAT files and corresponding clinical and specimen data for Prostate Adenocarcinoma samples were downloaded from the TCGA Data Portal website (http://tcga-data.nci.nih.gov/tcgafiles) on 26th May 2015. Data was imported into R, and clinical and specimen data was used to identify primary solid tumour tissue and normal solid tissue for analysis. We removed samples from non-white patients or patients with unknown ethnicity (n=91), as DNA methylation levels are known to differ by race/ethnicity (Devaney et al. 2015); and removed samples from patients where the matched normal tissue was adjacent (=<2 cm) to the tumour (n=4 patients), as tissue immediately adjacent to the tumour is more likely to show tumour-associated DNA methylation changes. We also restricted the analysis to samples of Prostate Adenocarcinoma Acinar Type, removing all other subtypes (n=15). Additional QC and processing steps were performed as described above. The resulting dataset comprised 414,133 CpG sites from 437 samples. We identified probes that overlapped the tsDMRs (between 1 and 15 CpG probes per tsDMR) and calculated the mean methylation of probes within each region. This approach gave methylation values for 109 hypermethylated tsDMRs and 92 hypomethylated tsDMRs. Paired T-tests were used to test the difference in methylation β values between matched tumour-normal pairs at the tsDMRs. The receiver operating characteristic (ROC) curve and respective area under the curve (AUC) were calculated for the same DNA methylation measurements using the ROCR package of the R software (version 1.0-7) (Sing et al. 2005).

**Bisulphite-amplicon sequencing with MiSeq**

Independent verification analysis was performed on ten additional patient-matched CAF-NPF pairs (20 samples). DNA was extracted, checked for quality and sodium bisulphite treated as described above. Primers were designed using the Sequenom EpiDesigner software (www.epidesigner.com). Bisulphite-PCR amplification was performed in duplicate using primers and optimised assay conditions described in the **Supplemental Table S9**. Methylation standards (0%, 50%, 100%) were included in all assays for quality control.

PCR products were quantitated using Qubit fluorometric quantitation (Life Technologies) and pooled per sample, before purification using the Wizard SV and PCR clean up system (Promega). Library preparation was performed using the TruSeq® DNA PCR-Free Low Sample Preparation Kit (Illumina, CA, USA) as per manufacturer’s instructions. The libraries were then quantified using the Qubit (Life Technologies) and KAPA SYBR FAST Universal qPCR. Libraries were pooled, diluted and loaded on the MiSeq cartridge (MiSeq reagent kit 300 cycles PE) and run on the Illumina MiSeq System (Illumina, CA, USA).

Paired-end FASTQ files were obtained for each library and aligned to hg19 using bwa-meth (http://github.com/brentp/bwa-meth) (Pedersen et al. 2014). Downstream analysis was performed using the ‘ampliconAnalysis’ function of the R package aaRon (https://github.com/astatham/aaRon). Data quality was checked by assessing the number of reads obtained and the bisulphite conversion efficiency per amplicon and per sample. All samples had high bisulphite conversion efficiency >98% and amplicons had >1000x coverage. Percent methylation at each CpG site was calculated and used in all subsequent analysis.

Paired t-tests and line plots were used to assess the methylation difference between matched pairs of samples for each amplicon, using R (version 3.1.1) (R Development Core Team 2010). The receiver operating characteristic (ROC) curve and respective area under the curve (AUC) were calculated for DNA methylation measurements using the ROCR package of the R software (version 1.0-7) (Sing et al. 2005). For ROC analysis of individual amplicons, mean DNA methylation values across each amplicon were calculated for each sample and used as the prediction values, and labels were assigned based on the known CAF-NPF status of each sample. For ROC analysis of the combined amplicons, mean DNA methylation values for each amplicon were transformed to z-scores, and the sign was reversed for z-scores at amplicons that were hypermethylated in the WGBS analysis to allow them to be combined with the z-scores of the hypomethylated loci. Finally, the mean z-score across all amplicons was calculated for each sample and used as the prediction values, and labels were assigned based on the known CAF-NPF status of each sample.

**RNA sequencing**

RNA (500 ng) from four patient-matched pairs of NPFs and CAFs (eight samples) was depleted of ribosomal RNA using RiboZero (Illumina, CA, USA). Library preparation was performed for each sample using the Illumina TruSeq Stranded Total RNA sample kit (Illumina, CA, USA) according to the manufacturer’s protocol. TruSeq directional paired-end sequencing with 75 bp chemistry was performed with six samples multiplexed per lane. After adaptor trimming with Trimgalore v0.2.8 (http://www.bioinformatics.babraham.ac.uk/projects/trim_galore), reads were mapped to hg19 using Tophat (version 2.0.10) (Kim et al. 2013) and transcripts assembled with Cufflinks (version 2.0.10) (Trapnell et al. 2010), both guided by GENCODE (Harrow et al. 2012) annotations (version 19). Uniquely mapped properly paired reads were unambiguously assigned to exons of GENCODE genes (version 19) and counted using ht-seqcount (version 0.5.4p3) (Anders et al. 2014) reads mapping to known rRNA loci were discarded using samtools (Li et al. 2009). These procedures were implemented in the NGSANE framework (Buske et al. 2014). Differentially expressed genes and transcripts were detected using edgeR (Robinson et al. 2010), as described by (Anders et al. 2013). The expression fold change plot of 18 CAF marker genes identified by (Franco et al. 2011; Kiskowski et al. 2011; Orr et al. 2012) used fold change values extracted from the edgeR results.

We used in-house LNCaP and PrEC RNA sequencing data that was generated and processed as previously described (Taberlay et al. 2016). All raw and processed data is publically available at NCBI Gene Expression Omnibus (GEO) (www.ncbi.nlm.nih.gov/geo) under accession number GSE73784.

**Microarray-based genome-wide expression analysis**

RNA (500 ng) from seven patient-matched sets of NPFs and CAFs (14 samples) was analysed using the Affymetrix Human Gene 1.0 ST Array (Affymetrix, CA, USA) in two sets. Dataset 1 contained 8 samples (4 pairs) with matched RNA-seq data, while dataset 2 contained 6 extra samples (3 pairs). CEL files were RMA normalised using Oligo (version 1.30.0) (Carvalho and Irizarry 2010) and probeset mappings to Ensembl Gene IDs were obtained from BioMart (ENSEMBL version 74) (Kasprzyk 2011).

**Quantitative RT-PCR**

Total RNA was reverse-transcribed using Superscript III (Invitrogen). All primers are listed in **Supplemental Table S10**. Each PCR reaction contained 4 μL of cDNA or standard, 0.2 μL of 10 mM primers, 5 μL SYBR Green (Applied Biosystems) and 0.8 μL of water. Samples were amplified on an ABI7900 HT thermocycler. Data represent average fold changes (n=3 technical replicates) calculated using the delta delta Ct method. Unless otherwise noted, the geometric mean for three reference genes (*GAPDH*, *HPRT1* and *RPLPO*) was used.

**Microarray-based genome-wide genotyping analysis**

DNA (200 ng) from four patient-matched pairs of NPFs and CAFs (n=8 samples) was used to assess genomic aberrations using Illumina HumanOmni2.5-8 BeadChips (Illumina, CA, USA). The raw array data was processed using crlmm (v1.25.1) (Ritchie et al. 2009). The resulting log R ratios were smoothed to remove outliers prior to segmentation using the R package DNAcopy. Copy numbers were estimated using circular binary segmentation (CBS) (Olshen et al. 2004) to translate intensity measurements into regions of equal copy number.

**Gene ontology and pathway analysis**

To analyze the functional significance of differentially methylated genomic regions, the Genomic Regions Enrichment of Annotations Tool (GREAT) was used with default parameters (McLean et al. 2010). GREAT was chosen as the tool takes genomic regions as input, rather than gene names, and then accurately models the assignment of genomic regions to genes.

Ingenuity Pathway Analysis software (IPA®, QIAGEN Redwood City) was used to map lists of identified genes (from DE-DMR and tsDMR analyses) to their corresponding gene object in the Ingenuity Knowledge Base (IKB), a repository of biological interactions and functional annotations created from millions of individually modeled relationships between proteins, genes, complexes, cells, tissues, drugs and diseases. Enrichment relative to the IKB database was assessed using a right-tailed Fisher's test with *P*<0.05.

**Prognostic analysis**

We applied 3 steps to identify genes for prognostic analysis: 1) We identified the nearest-protein coding gene to each tsDMR, then selected those which were differentially expressed in the same direction in both CAF vs NPF and LNCaP vs PrEC, with absolute fold change ≥1.5 and raw p-value<0.05. 2)To determine which of these expression changes were observable in patient specimens, we used the TCGA PRAD processed RNA-seq V2 data (level 3), downloaded from the TCGA Data Portal website (http://tcga-data.nci.nih.gov/tcgafiles) on 19th April 2016. We extracted the samples matching the earlier TCGA PRAD 450K methylation data (described above - tumour n=392, normal=45). Differentially expressed genes between tumour and normal specimens were detected using edgeR (Robinson et al.). Genes were selected for further analysis if the expression change was in the same direction as the CAF and LNCaP expression change and with FDR<0.05. 3) RNA-sequencing data from the Taylor dataset (Taylor et al. 2010) were downloaded from the NCBI GEO database with accession GSE21032. Clinical parameters were obtained from Supplementary Table 1 of (Taylor et al. 2010). RNA-sequencing data was normalised as previously described (Cerami et al. 2012). Outlier samples were detected and removed based on abnormally low or high total expression of all probes. In addition, samples from patients receiving chemotherapy or neoadjuvant hormones therapy were removed, since these treatments affect gene expression. After the data pre-processing phase, n=127 patients were retained for subsequent analyses. Using the R ggplot2 v2.0.0 package, we plotted histograms of the genes of interest within the Taylor 2010 cohort to identify bimodally-distributed genes which would be suitable for expression-based recurrence free survival analysis (Hellwig et al. 2010). Finally, we assessed the impact of gene expression on recurrence free survival, using the R survival 2.39 package. The boundary between of 2 Gaussian mixtures in the bimodal distribution was used as a natural threshold. Two genes met all three criteria, *CCDC68* and *RNF152* (threshold=5.1 for *CDCC68*, threshold=7.42 for *RNF152*). Only *CCDC68* was associated with recurrence free survival. Kaplan-Meier (KM) analysis with log-rank test was used to assess survival outcomes, while Cox proportional hazards regression was used to test the prognostic association between gene expression and clinical parameters. To further test the prognostic relevance of CCDC68 we downloaded additional data for the Glinsky dataset (Glinsky et al. 2004) from the Oncomine Database: Affymetrix Human Genome U95Av2 array data for *CCDC68* and corresponding biochemical recurrence data (n=79 patients, of which n=37 BCR and n=42 no BCR). Survival analysis was performed as described above.

**Supplemental References**

Anders S, McCarthy DJ, Chen Y, Okoniewski M, Smyth GK, Huber W, Robinson MD. 2013. Count-based differential expression analysis of RNA sequencing data using R and Bioconductor. *Nat Protocols* **8**(9): 1765-1786.

Anders S, Pyl PT, Huber W. 2014. HTSeq-a Python framework to work with high-throughput sequencing data. *Bioinformatics*.

Aryee MJ, Jaffe AE, Corrada-Bravo H, Ladd-Acosta C, Feinberg AP, Hansen KD, Irizarry RA. 2014. Minfi: a flexible and comprehensive Bioconductor package for the analysis of Infinium DNA methylation microarrays. *Bioinformatics* **30**(10): 1363-1369.

Burger L, Gaidatzis D, Schubeler D, Stadler MB. 2013. Identification of active regulatory regions from DNA methylation data. *Nucleic Acids Res* **41**(16): e155.

Buske FA, French HJ, Smith MA, Clark SJ, Bauer DC. 2014. NGSANE: A Lightweight Production Informatics Framework for High Throughput Data Analysis. *Bioinformatics*.

Carvalho BS, Irizarry RA. 2010. A Framework for Oligonucleotide Microarray Preprocessing. *Bioinformatics*.

Cerami E, Gao J, Dogrusoz U, Gross BE, Sumer SO, Aksoy BA, Jacobsen A, Byrne CJ, Heuer ML, Larsson E et al. 2012. The cBio cancer genomics portal: an open platform for exploring multidimensional cancer genomics data. *Cancer Discov* **2**(5): 401-404.

Clark AK, Taubenberger AV, Taylor RA, Niranjan B, Chea ZY, Zotenko E, Sieh S, Pedersen JS, Norden S, Frydenberg M et al. 2013. A bioengineered microenvironment to quantitatively measure the tumorigenic properties of cancer-associated fibroblasts in human prostate cancer. *Biomaterials* **34**(20): 4777-4785.

Clark SJ, Statham A, Stirzaker C, Molloy PL, Frommer M. 2006. DNA methylation: bisulphite modification and analysis. *Nat Protoc* **1**(5): 2353-2364.

Devaney JM, Wang S, Furbert-Harris P, Apprey V, Ittmann M, Wang BD, Olender J, Lee NH, Kwabi-Addo B. 2015. Genome-wide differentially methylated genes in prostate cancer tissues from African-American and Caucasian men. *Epigenetics* **10**(4): 319-328.

Ernst J, Kheradpour P, Mikkelsen TS, Shoresh N, Ward LD, Epstein CB, Zhang X, Wang L, Issner R, Coyne M et al. 2011. Mapping and analysis of chromatin state dynamics in nine human cell types. *Nature* **473**(7345): 43-49.

Fortin JP, Labbe A, Lemire M, Zanke BW, Hudson TJ, Fertig EJ, Greenwood CM, Hansen KD. 2014. Functional normalization of 450k methylation array data improves replication in large cancer studies. *Genome Biol* **15**(11): 503.

Franco OE, Jiang M, Strand DW, Peacock J, Fernandez S, Jackson RS, 2nd, Revelo MP, Bhowmick NA, Hayward SW. 2011. Altered TGF-beta signaling in a subpopulation of human stromal cells promotes prostatic carcinogenesis. *Cancer Res* **71**(4): 1272-1281.

Frobel J, Hemeda H, Lenz M, Abagnale G, Joussen S, Denecke B, Saric T, Zenke M, Wagner W. 2014. Epigenetic rejuvenation of mesenchymal stromal cells derived from induced pluripotent stem cells. *Stem cell reports* **3**(3): 414-422.

Glinsky GV, Glinskii AB, Stephenson AJ, Hoffman RM, Gerald WL. 2004. Gene expression profiling predicts clinical outcome of prostate cancer. *J Clin Invest* **113**(6): 913-923.

Hansen KD, Langmead B, Irizarry RA. 2012. BSmooth: from whole genome bisulfite sequencing reads to differentially methylated regions. *Genome Biol* **13**(10): R83.

Harrow J, Frankish A, Gonzalez JM, Tapanari E, Diekhans M, Kokocinski F, Aken BL, Barrell D, Zadissa A, Searle S et al. 2012. GENCODE: The reference human genome annotation for The ENCODE Project. *Genome Res* **22**(9): 1760-1774.

Heger A, Webber C, Goodson M, Ponting CP, Lunter G. 2013. GAT: a simulation framework for testing the association of genomic intervals. *Bioinformatics* **29**(16): 2046-2048.

Hellwig B, Hengstler JG, Schmidt M, Gehrmann MC, Schormann W, Rahnenfuhrer J. 2010. Comparison of scores for bimodality of gene expression distributions and genome-wide evaluation of the prognostic relevance of high-scoring genes. *BMC bioinformatics* **11**: 276.

Kasprzyk A. 2011. BioMart: driving a paradigm change in biological data management. *Database* **2011**.

Kim D, Pertea G, Trapnell C, Pimentel H, Kelley R, Salzberg S. 2013. TopHat2: accurate alignment of transcriptomes in the presence of insertions, deletions and gene fusions. *Genome Biol* **14**(4): R36.

Kiskowski MA, Jackson RS, 2nd, Banerjee J, Li X, Kang M, Iturregui JM, Franco OE, Hayward SW, Bhowmick NA. 2011. Role for stromal heterogeneity in prostate tumorigenesis. *Cancer Res* **71**(10): 3459-3470.

Krueger F, Andrews SR. 2011. Bismark: a flexible aligner and methylation caller for Bisulfite-Seq applications. *Bioinformatics* **27**(11): 1571-1572.

Lawrence M, Gentleman R, Carey V. 2009. rtracklayer: an R package for interfacing with genome browsers. *Bioinformatics* **25**(14): 1841-1842.

Lawrence MG, Taylor RA, Toivanen R, Pedersen J, Norden S, Pook DW, Frydenberg M, Australian Prostate Cancer B, Papargiris MM, Niranjan B et al. 2013. A preclinical xenograft model of prostate cancer using human tumors. *Nat Protoc* **8**(5): 836-848.

Li H, Handsaker B, Wysoker A, Fennell T, Ruan J, Homer N, Marth G, Abecasis G, Durbin R, Subgroup GPDP. 2009. The Sequence Alignment/Map (SAM) Format and SAMtools. *Bioinformatics*.

McLean CY, Bristor D, Hiller M, Clarke SL, Schaar BT, Lowe CB, Wenger AM, Bejerano G. 2010. GREAT improves functional interpretation of cis-regulatory regions. *Nat Biotechnol* **28**(5): 495-501.

Naeem H, Wong NC, Chatterton Z, Hong MK, Pedersen JS, Corcoran NM, Hovens CM, Macintyre G. 2014. Reducing the risk of false discovery enabling identification of biologically significant genome-wide methylation status using the HumanMethylation450 array. *BMC Genomics* **15**: 51.

Niranjan B, Lawrence MG, Papargiris MM, Richards MG, Hussain S, Frydenberg M, Pedersen J, Taylor RA, Risbridger GP. 2013. Primary culture and propagation of human prostate epithelial cells. *Methods Mol Biol* **945**: 365-382.

Olshen AB, Venkatraman ES, Lucito R, Wigler M. 2004. Circular binary segmentation for the analysis of array-based DNA copy number data. *Biostatistics* **5**(4): 557-572.

Olumi AF, Grossfeld GD, Hayward SW, Carroll PR, Tlsty TD, Cunha GR. 1999. Carcinoma-associated fibroblasts direct tumor progression of initiated human prostatic epithelium. *Cancer Res* **59**(19): 5002-5011.

Orr B, Riddick AC, Stewart GD, Anderson RA, Franco OE, Hayward SW, Thomson AA. 2012. Identification of stromally expressed molecules in the prostate by tag-profiling of cancer-associated fibroblasts, normal fibroblasts and fetal prostate. *Oncogene* **31**(9): 1130-1142.

Pedersen B, Eyring K, De S, Yang I, Schwartz D. 2014. Fast and accurate alignment of long bisulfite-seq reads. *bioRxiv arXiv:1401 1129*

R Development Core Team. 2010. R: A Language and Environment for Statistical Computing. R Foundation for Statistical Computing.

Reinisch A, Etchart N, Thomas D, Hofmann NA, Fruehwirth M, Sinha S, Chan CK, Senarath-Yapa K, Seo EY, Wearda T et al. 2015. Epigenetic and in vivo comparison of diverse MSC sources reveals an endochondral signature for human hematopoietic niche formation. *Blood* **125**(2): 249-260.

Ritchie ME, Carvalho BS, Hetrick KN, Tavare S, Irizarry RA. 2009. R/Bioconductor software for Illumina's Infinium whole-genome genotyping BeadChips. *Bioinformatics* **25**(19): 2621-2623.

Robinson MD, McCarthy DJ, Smyth GK. 2010. edgeR: a Bioconductor package for differential expression analysis of digital gene expression data. *Bioinformatics* **26**(1): 139-140.

Shao K, Koch C, Gupta MK, Lin Q, Lenz M, Laufs S, Denecke B, Schmidt M, Linke M, Hennies HC et al. 2013. Induced pluripotent mesenchymal stromal cell clones retain donor-derived differences in DNA methylation profiles. *Mol Ther* **21**(1): 240-250.

Sing T, Sander O, Beerenwinkel N, Lengauer T. 2005. ROCR: visualizing classifier performance in R. *Bioinformatics* **21**(20): 3940-3941.

Taberlay PC, Achinger-Kawecka J, Lun AT, Buske FA, Sabir K, Gould CM, Zotenko E, Bert SA, Giles KA, Bauer DC et al. 2016. Three-dimensional disorganization of the cancer genome occurs coincident with long-range genetic and epigenetic alterations. *Genome Res* **26**(6): 719-731.

Taylor BS, Schultz N, Hieronymus H, Gopalan A, Xiao Y, Carver BS, Arora VK, Kaushik P, Cerami E, Reva B et al. 2010. Integrative genomic profiling of human prostate cancer. *Cancer Cell* **18**(1): 11-22.

Taylor RA, Toivanen R, Frydenberg M, Pedersen J, Harewood L, Australian Prostate Cancer B, Collins AT, Maitland NJ, Risbridger GP. 2012. Human epithelial basal cells are cells of origin of prostate cancer, independent of CD133 status. *Stem Cells* **30**(6): 1087-1096.

Trapnell C, Williams BA, Pertea G, Mortazavi A, Kwan G, van Baren MJ, Salzberg SL, Wold BJ, Pachter L. 2010. Transcript assembly and quantification by RNA-Seq reveals unannotated transcripts and isoform switching during cell differentiation. *Nat Biotech* **28**(5): 511-515.

Triche TJ, Jr., Weisenberger DJ, Van Den Berg D, Laird PW, Siegmund KD. 2013. Low-level processing of Illumina Infinium DNA Methylation BeadArrays. *Nucleic Acids Res* **41**(7): e90.
