# Supplementary material for: Enduring epigenetic landmarks define the cancer microenvironment
Source: HighWire-hosted journal article supplement (doi:10.1101/gr.229070.117), 2018-04-12
Supplement: Supplemental_Table_S1.xlsx [file Supplemental_Table_S1.xlsx]

## Sheet: Supplemental Table S1
Supplemental Table S1: Summary of patient clinical information, validation of primary cultures and bisulphite sequencing metrics
Patient data
1 Patient numbers used for co-culture assays (Clark, 2013, Biomaterials) are shown in brackets.
2 ERG status was determined using immunohistochemistry as previously described (Park et al, 2010, Neoplasia [PMID: 20651988])
3 The prostatic zones that were dissected are indicated as TZ (transition zone) or PZ (peripheral zone) with the anatomical location (left or right side and apex, middle (mid) or base of the prostate) of each sample
4 Pathology is scored from small pieces of tissue reserved at the time that samples are digested for cell culture (Lawrence, 2013, Nature Protocols)
5 Tissue recombination experiments were analysed by an experienced Uropathologist based on previously reported features (Olumi, 1999, Cancer Research; Taylor, 2012, Stem Cells)
CAFs were defined as tumorigenic if they induced BPH-1 cells to form poorly differentiated grafts typically containing small nests of epithelial cells, minimal keratinization, prominent nucleoli, increase nuclear:cytoplasmic ratio, mitotic figures and occasional invasion towards the mouse kidney.
NPFs were defined as non-tumorigenic if the BPH-1 cells formed well differentiated grafts with abundant keratinization, few nuclear changes, graduated differentiation and no evidence of invasion.
6 The results of co-culture experiments were previously reported (Clark, 2013, Biomaterials). CAFs were defined as being inductive in vitro, if they induced BPH-1 cells to adopt a more elongated morphology (as measured by a lower shape factor) in co-culture assays compared to BPH-1 cells co-cultured with NPFs.
# ND = not done
	Patient Clinical Information									Features of Dissected Prostate Tissue				Validation of Fibroblast Cultures
Patient 1	Age	Gleason Score (Index Tumor)	T Stage	Focality	ERG status 2	Margins and invasion	Ethnicity	Family history	Follow-up	Prostatic Zone Dissected 3		Pathology of Dissected Tissue 4		Immunocytochemistry of Fibroblast Cultures (NPF/CAF)			SFRP1 Expression ( Fold Change CAF/NPF)	In Vivo Tumourogenicity 5		Phenotype in Co-cultures 6
										NPFs	CAFs	NPFs	CAFs	CK8/18	HMWCK	Vimentin		NPFs	CAFs
1	72	7 (3+4)	pT3a	Unifocal	Heterogenous staining	Positive margins, extraprostatic extension, multifocal perineural invasion	Caucasion	No family history	No recurrence	Left TZ	PZ - Right apex	Benign	7 (4+3)	-/-	-/-	100%/90%	3.38	No	Yes	ND
2 (v)	61	8 (4+4)	pT2a	Unifocal	Negative	Perineural invasion	Caucasion	No family history	No recurrence	PZ - Right mid	PZ - Left mid	Benign	8 (4+4)	<1%/<1%	<1%/-	100%/100%	7.89	No	Yes	CAF inductive
3 (i)	63	7 (3+4)	pT2c	Multifocal	Negative	Perineural invasion	Caucasion	No family history	No recurrence	Not recorded	PZ - Left apex	Benign	ND	-/-	-/-	100%/100%	3.09	No	Yes	CAF inductive
4 (iii)	68	7 (3+4)	pT3a	Multifocal	Negative	Positive margins, extraprostatic extension, extensive perineural invasion	Caucasion	No family history	No recurrence	Right TZ (GS6 nearby)	PZ - Left mid	2 AMACR+ foci detected	7 (3+4)	-/-	-/-	100%/100%	8.2	No	Yes	CAF inductive
5	74	9 (4+5)	pT3a	Multifocal	Positive	Perineural invasion, extraprostatic extension right apex and right bladder neck	Caucasion	No family history	No recurrence	Left TZ	PZ - Right mid	Benign	9 (4+5)	-/-	-/-	100%/100%	0.99	No	Yes	ND
6 (ii)	51	7 (4+3)	pT2c	Multifocal	Negative	Positive margins, minimal perineural invasion	Caucasion	No family history	Relapsed. Developed castrate resistant prostate cancer and bone metastases.	Left PZ	PZ - Left apex	Benign	8 (4+4)	-/-	-/-	100%/100%	2.18	Partially tumorigenic	Yes	CAF inductive
7 (iv)	69	9 (4+5)	pT3b	Multifocal	Positive	Perineural invasion, extensive extra-prostatic extension and invasion into left seminal vesicles	Caucasion	Unknown	Relapsed. Developed castrate resistant prostate cancer with metastases to bone and soft tissue.	PZ - Right mid	PZ - Left mid	Benign	9 (4+5)	-/-	-/-	100%/100%	0.47	No	Yes	CAF inductive
8	72	7 (4+3)	pT2c	Multifocal	Heterogenous staining	Perineural invasion	Caucasion	No family history	No recurrence	Left PZ	Right PZ	Benign	7 (4+3)	<1%/-	<1%/-	100%/100%	1.46	No	Yes	ND
9	60	9 (4+5)	pT3b	Multifocal	Positive	Perineural invasion, extraprostatic extension, positive margins, seminal vesicle invasion, and 4 positive lymph nodes	Caucasion	No family history	Relapsed. Developed metastatic castrate resistant prostate cancer with bone metastases.	Right TZ	PZ - Right mid	Benign	9 (5+4)	ND/-	ND/-	ND/90	2.77	No	Yes	ND
10	60	7 (3+4)	pT2c	Multifocal	Not done	Perineural invasion	Caucasion	No family history	No recurrence	Right TZ	PZ - Left mid to apex	Benign	7 (4+3)	-/-	-/-	100%/100%	1.83	No	Yes	ND
11	70	7 (3+4)	pT3a	Multifocal	Positive	Perineural invasion, extraprostatic extension, positive margin	Caucasion	No family history	No recurrence	PZ – Right apex	PZ – Left Apex	Benign	7 (4+3)	-/-	-/-	100%/100%	0.99	No	Yes	ND
12	53	7 (4+3)	pT3a	Unifocal	Positive	Perineural invasion	Caucasion	No family history	No recurrence	Left TZ	PZ - Right Mid	Benign	6 (3+3)	-/-	-/-	80%/100%	2.23	No	Yes	ND
13	69	7 (4+3)	pT3b	Multifocal	Heterogenous staining	Perineural invasion, seminal vesicle invasion	Caucasion	No family history	Unknown	Right TZ	PZ - Left base mid	Benign	7 (4+3)	-/ND	-/-	100%/100%	1.94	No	Yes	ND
14	56	7 (3+4)	pT3b	Unifocal	Positive	Perineural invasion, extraprostatic extension left apex, posterior and bladder neck, positive margin, seminal vesicle invasion	Caucasion	No family history	Relapsed, rising PSA, detection of disease by MRI	Right TZ	Left PZ	Benign	7 (3+4)	-/-	-/-	100%/100%	3.34	Partially tumorigenic	Yes	ND
15	72	7 (3+4)	pT3a	Multifocal	Positive	Perineural invasion, extraprostatic extension	Caucasion	No family history	Gradual rise in PSA	Left TZ	PZ - Right mid	Benign	7 (3+4)	-/-	-/-	100%/100%	0.62	No	Yes	ND
16	61	7 (4+3)	pT3b	Multifocal	Positive	Perineural invasion, extraprostatic extension, seminal vesicle invasion	Caucasion	No family history	No recurrence	Left TZ	PZ – Right mid	Benign	7 (3+4)	-/-	-/-	100%/90%	0.48	No	Yes	ND
17	69	9 (4+5)	pT3b	Multifocal	Negative	Perineural invasion, positive margin, seminal vesicle invasion, 2 positive lymph nodes	Caucasion	No family history	Neo-adjuvant androgen deprivation before surgery. Rising PSA.	Right TZ	Left PZ	Benign	6 (3+3)	-/-	-/-	80%/90%	2.45	No	Yes	ND
