# Supplementary material for: Enduring epigenetic landmarks define the cancer microenvironment
Source: HighWire-hosted journal article supplement (doi:10.1101/gr.229070.117), 2018-04-12
Supplement: Supplemental_Table_S2.xlsx [file Supplemental_Table_S2.xlsx]

## Sheet: Supplemental Table S2
Supplemental Table S2: Differentially methylated regions identified in CAFs compared to NPFs with whole genome bisulfite sequencing
1 For the distance of DMRs to the TSS of the nearest protein-coding gene, positive values indicate that the DMR lies downstream of the TSS, while negative values indicate that the DMR lies upstream of the TSS.
2 areaStat is the sum of the t-statistics for all CpGs within the DMR
3 maxStat is the largest t-statistic of the CpGs within the DMR
4 tstat.sd is the standard deviation of the CpGs within the DMR, across the 2 groups
Hypermethylated DMRs in CAFs													Hypomethylated DMRs in CAFs
Chromosome	Start	End	Width	Distance to TSS 1	Gene name	Gene ID	NPF mean methylation	CAF mean methylation	Mean difference (%)	areaStat 2	maxStat 3	tstat.sd 4	Chromosome	Start	End	Width	Distance to TSS 1	Gene name	Gene ID	NPF mean methylation	CAF mean methylation	Mean difference (%)	areaStat 2	maxStat 3	tstat.sd 4
chr1	842039	842689	651	-17570	SAMD11	ENSG00000187634	42.06	60.5192	18.4593	67.2232	3.54076	0.0552368	chr1	761445	761605	161	-22307	AL669831.1	ENSG00000269831	80.4586	57.3672	-23.0914	-10.8121	-3.23748	0.0556726
chr1	1147769	1148535	767	976	TNFRSF4	ENSG00000186827	21.6318	46.1871	24.5553	78.602	3.72675	0.0776691	chr1	879098	879540	443	4442	SAMD11	ENSG00000187634	55.9112	35.1944	-20.7168	-71.9411	-3.02547	0.0596907
chr1	1377431	1377768	338	6315	VWA1	ENSG00000179403	33.6755	54.2997	20.6243	59.5141	3.67097	0.0668375	chr1	915865	916175	311	1297	C1orf170	ENSG00000187642	63.6123	37.7356	-25.8767	-51.8814	-3.00851	0.0740393
chr1	1440276	1440506	231	-7024	ATAD3A	ENSG00000197785	40.3344	60.6248	20.2903	36.212	3.91855	0.0551071	chr1	1268716	1269065	350	2021	TAS1R3	ENSG00000169962	73.8551	53.7332	-20.1219	-78.3615	-3.11054	0.0523896
chr1	2179347	2179520	174	19212	SKI	ENSG00000157933	55.6522	70.223	14.5707	43.7947	3.17622	0.0585878	chr1	1546501	1547016	516	-3778	MIB2	ENSG00000197530	77.4625	57.0307	-20.4318	-16.2377	-3.05125	0.0598527
chr1	2369314	2370053	740	11894	PLCH2	ENSG00000149527	35.6359	54.5852	18.9493	107.183	4.76196	0.056359	chr1	1593508	1593683	176	-3034	CDK11B	ENSG00000248333	72.0579	50.1569	-21.901	-13.2778	-3.19972	0.0605076
chr1	2391009	2391228	220	-7669	PLCH2	ENSG00000149527	26.4989	46.7427	20.2439	29.5589	3.41801	0.0672081	chr1	1622676	1622827	152	1255	SLC35E2B	ENSG00000189339	48.7661	26.7068	-22.0593	-11.16	-3.27174	0.0542686
chr1	2515484	2515774	291	-2439	FAM213B	ENSG00000157870	18.9232	36.568	17.6448	31.9652	3.23038	0.0526627	chr1	1678608	1679088	481	-1176	SLC35E2	ENSG00000215790	52.2614	27.466	-24.7954	-51.9144	-3.69585	0.0551709
chr1	2827966	2828386	421	-109659	ACTRT2	ENSG00000169717	50.7719	73.0552	22.2833	94.8147	3.85636	0.056621	chr1	1887133	1887271	139	0	C1orf222	ENSG00000142609	59.7086	41.2403	-18.4684	-19.8153	-3.11715	0.0590974
chr1	3213431	3213488	58	52734	PRDM16	ENSG00000142611	44.5065	62.1602	17.6538	15.5551	3.13022	0.0570229	chr1	1983102	1983260	159	854	PRKCZ	ENSG00000067606	65.7043	49.1721	-16.5321	-35.3863	-3.05121	0.056409
chr1	3311541	3311656	116	-1398	PRDM16	ENSG00000142611	32.2407	49.9652	17.7246	15.9982	3.35244	0.0540244	chr1	2019682	2020407	726	12998	PRKCZ	ENSG00000067606	66.902	40.8985	-26.0035	-106.295	-3.23053	0.0639883
chr1	3570315	3570535	221	-989	WRAP73	ENSG00000116213	42.8236	63.9789	21.1553	21.7912	3.18471	0.0605121	chr1	2101479	2102037	559	-19199	AL590822.2	ENSG00000269554	44.8929	23.7881	-21.1048	-58.4993	-3.11613	0.0551257
chr1	3665082	3665508	427	-3453	CCDC27	ENSG00000162592	57.6707	77.4551	19.7844	46.0396	3.74452	0.0572375	chr1	2180973	2181311	339	20838	SKI	ENSG00000157933	75.2956	52.4232	-22.8723	-33.3064	-3.15094	0.0596646
chr1	3809510	3810006	497	6842	C1orf174	ENSG00000198912	52.44	72.4249	19.9849	51.8861	4.49148	0.0521376	chr1	2254245	2254338	94	-4242	AL589739.1	ENSG00000269753	74.3561	51.2414	-23.1148	-21.7694	-3.02014	0.0641058
chr1	4190733	4191674	942	-373883	C1orf174	ENSG00000198912	32.9953	56.5185	23.5232	50.912	3.835	0.061571	chr1	2864969	2865079	111	-72966	ACTRT2	ENSG00000169717	51.0672	35.6977	-15.3695	-15.7691	-3.08323	0.0537902
chr1	4222029	4222311	283	-405179	C1orf174	ENSG00000198912	5.34434	21.5989	16.2546	24.7456	3.13378	0.0525699	chr1	2988859	2989177	319	3083	PRDM16	ENSG00000142611	54.3808	30.382	-23.9988	-23.6217	-3.02436	0.0643483
chr1	4713389	4713601	213	-1190	AJAP1	ENSG00000196581	20.4241	37.6892	17.265	22.7991	3.37142	0.0549986	chr1	3028319	3028790	472	42543	PRDM16	ENSG00000142611	64.2553	43.7539	-20.5013	-82.8402	-3.02297	0.0569276
chr1	5995261	5996093	833	-55432	KCNAB2	ENSG00000069424	42.4297	62.3217	19.892	50.1059	3.88214	0.0642968	chr1	3102759	3103029	271	-57666	PRDM16	ENSG00000142611	47.5247	27.1195	-20.4052	-62.4383	-3.02555	0.0533439
chr1	6009244	6009977	734	-41548	KCNAB2	ENSG00000069424	42.5093	65.5039	22.9946	78.0849	5.15124	0.0526527	chr1	3121072	3121528	457	-39167	PRDM16	ENSG00000142611	56.0326	34.7639	-21.2687	-94.5755	-3.23514	0.0523531
chr1	7395327	7395829	503	-400638	CAMTA1	ENSG00000171735	40.1158	58.3778	18.262	45.5229	4.03428	0.0539685	chr1	3141814	3142026	213	-18669	PRDM16	ENSG00000142611	40.548	14.9635	-25.5844	-44.857	-3.11461	0.063537
chr1	7411572	7412242	671	-384225	CAMTA1	ENSG00000171735	40.2417	62.5559	22.3141	81.7524	4.37997	0.0604719	chr1	3229075	3229321	247	68378	PRDM16	ENSG00000142611	57.5576	36.4875	-21.0701	-46.9432	-3.01727	0.0621633
chr1	7618229	7618415	187	-178052	CAMTA1	ENSG00000171735	53.2533	72.4807	19.2274	34.9773	3.25307	0.0599389	chr1	3275445	3275758	314	-37296	PRDM16	ENSG00000142611	65.0788	45.7778	-19.301	-39.8066	-3.02881	0.0575162
chr1	7911228	7911689	462	1405	UTS2	ENSG00000049247	54.3723	74.4694	20.0971	32.0837	3.2883	0.0541097	chr1	3332294	3332360	67	19238	PRDM16	ENSG00000142611	39.6324	19.4056	-20.2268	-15.1315	-3.00571	0.0581749
chr1	8241907	8242978	1072	-134907	SLC45A1	ENSG00000162426	46.7185	76.817	30.0985	87.6291	5.87103	0.0625256	chr1	3476837	3477442	606	-28824	MEGF6	ENSG00000162591	70.9205	47.3343	-23.5862	-66.5122	-3.14945	0.0804881
chr1	8272230	8272440	211	-105445	SLC45A1	ENSG00000162426	58.0451	73.9251	15.88	28.7119	3.24129	0.0521287	chr1	4793436	4793747	312	78330	AJAP1	ENSG00000196581	64.7482	37.8745	-26.8736	-34.0088	-3.02253	0.0833993
chr1	8404031	8404296	266	18607	RERE	ENSG00000142599	19.4016	42.9528	23.5512	55.0029	5.50746	0.0628668	chr1	5473129	5473587	459	-577938	KCNAB2	ENSG00000069424	47.6092	28.0619	-19.5473	-41.0031	-3.03649	0.0658083
chr1	8408846	8409264	419	13639	RERE	ENSG00000142599	35.5365	50.6521	15.1156	64.5148	3.51934	0.0550637	chr1	5817321	5817516	196	-234009	KCNAB2	ENSG00000069424	51.2653	31.6336	-19.6316	-43.7374	-3.00739	0.0637265
chr1	8485011	8485262	252	9	RERE	ENSG00000142599	30.7698	49.594	18.8241	19.7293	4.10059	0.0540039	chr1	5998737	5998909	173	-52616	KCNAB2	ENSG00000069424	82.3696	58.9643	-23.4053	-15.2007	-3.01119	0.0671647
chr1	8616362	8616749	388	-30275	RERE	ENSG00000142599	65.2593	86.8706	21.6112	31.2054	3.54064	0.0613324	chr1	6264727	6264965	239	-1172	RPL22	ENSG00000116251	49.7377	31.1787	-18.559	-30.8376	-3.03686	0.0537097
chr1	8689865	8690564	700	-5425	RERE	ENSG00000142599	41.4413	61.8961	20.4548	25.0782	3.20044	0.0541466	chr1	6402240	6402448	209	9860	ACOT7	ENSG00000097021	82.6682	64.6095	-18.0587	-24.7901	-3.02257	0.0557765
chr1	9312781	9313399	619	12877	H6PD	ENSG00000049239	56.1055	74.3349	18.2294	37.2246	3.16581	0.0580474	chr1	6513810	6514041	232	2091	ESPN	ENSG00000187017	60.3236	40.9901	-19.3336	-20.3271	-3.14443	0.055905
chr1	9371180	9372103	924	16592	SPSB1	ENSG00000171621	63.2732	83.8582	20.585	98.5729	5.74631	0.0527381	chr1	6561023	6561634	612	-3538	PLEKHG5	ENSG00000171680	59.7601	36.1147	-23.6454	-84.101	-3.18748	0.063574
chr1	10498827	10499411	585	4102	APITD1-CORT	ENSG00000251503	62.4672	81.2981	18.8308	24.8635	3.88319	0.0523941	chr1	6641092	6641347	256	943	ZBTB48	ENSG00000204859	69.3895	52.0855	-17.304	-17.3004	-3.19467	0.0528899
chr1	11168276	11168937	662	6782	MTOR	ENSG00000198793	62.2712	83.3753	21.1041	52.1361	4.17071	0.0531062	chr1	6664520	6664599	80	-1458	KLHL21	ENSG00000162413	45.0906	21.4707	-23.6198	-9.59803	-3.00378	0.0556772
chr1	11169249	11169863	615	5856	MTOR	ENSG00000198793	61.7987	81.9902	20.1916	28.9355	4.13392	0.0531062	chr1	6698390	6698866	477	13099	THAP3	ENSG00000041988	86.8369	61.4924	-25.3444	-58.9514	-3.07328	0.0652767
chr1	11841274	11841749	476	1399	C1orf167	ENSG00000215910	57.6357	78.0031	20.3674	59.5047	3.52349	0.0611282	chr1	6733527	6734082	556	7014	DNAJC11	ENSG00000007923	69.5124	48.6377	-20.8747	-29.5003	-3.10009	0.052851
chr1	11939748	11940113	366	-20759	NPPB	ENSG00000120937	40.3376	63.8042	23.4666	50.4106	3.53335	0.0641778	chr1	6932767	6933110	344	87175	CAMTA1	ENSG00000171735	70.2325	43.623	-26.6096	-20.8761	-3.70258	0.0590143
chr1	12174133	12174203	71	-11752	TNFRSF8	ENSG00000120949	51.0428	72.9419	21.8991	12.4688	3.15567	0.0599896	chr1	6933536	6933724	189	87944	CAMTA1	ENSG00000171735	82.163	56.6445	-25.5185	-15.9766	-3.80748	0.0590143
chr1	12174588	12175205	618	-10750	TNFRSF8	ENSG00000120949	44.4373	69.9205	25.4832	61.533	3.74101	0.0613799	chr1	6965743	6966166	424	120151	CAMTA1	ENSG00000171735	66.7805	47.1356	-19.6448	-26.8085	-3.19731	0.0521287
chr1	12192849	12193536	688	6892	TNFRSF8	ENSG00000120949	43.7546	68.9821	25.2275	68.473	4.90184	0.0618559	chr1	7120631	7121206	576	275039	CAMTA1	ENSG00000171735	54.5833	27.9649	-26.6184	-75.1471	-3.20492	0.066061
chr1	15312359	15312632	274	39943	KAZN	ENSG00000189337	41.3682	74.031	32.6628	21.391	3.08608	0.084059	chr1	7844853	7845347	495	89	PER3	ENSG00000049246	65.5464	39.188	-26.3584	-133.62	-3.02639	0.053687
chr1	15528492	15528633	142	-30678	C1orf195	ENSG00000204464	35.3647	48.2066	12.8419	12.1828	3.0882	0.0522683	chr1	8180911	8182264	1354	-94542	ERRFI1	ENSG00000116285	44.0346	20.724	-23.3106	-118.976	-3.15179	0.0533346
chr1	15743598	15744163	566	6836	EFHD2	ENSG00000142634	39.6351	53.2451	13.6101	51.8611	3.66778	0.0539936	chr1	8194499	8195189	691	-108130	ERRFI1	ENSG00000116285	60.757	29.3649	-31.3921	-84.7549	-3.12681	0.0524306
chr1	15753696	15754172	477	-10762	CTRC	ENSG00000162438	26.7373	43.631	16.8937	45.4449	4.85257	0.0528128	chr1	8378725	8378988	264	555	SLC45A1	ENSG00000162426	60.8127	42.0686	-18.7442	-39.5741	-3.12397	0.0521914
chr1	16394321	16394888	568	5232	FAM131C	ENSG00000185519	40.9247	60.617	19.6924	59.153	3.62377	0.0550701	chr1	8413209	8414100	892	8803	RERE	ENSG00000142599	72.2364	38.2104	-34.0259	-70.7968	-3.02598	0.0767236
chr1	16499612	16500274	663	-17029	EPHA2	ENSG00000142627	36.4996	62.1954	25.6959	76.3087	5.45144	0.0537729	chr1	8423387	8423728	342	-482	RERE	ENSG00000142599	73.7555	50.0625	-23.693	-23.1377	-3.06371	0.062008
chr1	17307873	17308206	334	-542	MFAP2	ENSG00000117122	54.6975	74.7662	20.0687	24.1104	3.6406	0.0551955	chr1	8740812	8741508	697	21769	RERE	ENSG00000142599	84.9729	64.2127	-20.7602	-47.5578	-3.10449	0.0533689
chr1	18038424	18038737	314	-43070	ACTL8	ENSG00000117148	38.103	56.6437	18.5407	16.2223	3.42526	0.0529536	chr1	8786236	8786371	136	-22957	RERE	ENSG00000142599	52.1567	32.4359	-19.7208	-25.3632	-3.01697	0.0573789
chr1	19144739	19145269	531	40906	TAS1R2	ENSG00000179002	38.7075	59.916	21.2085	28.9906	3.42265	0.0540661	chr1	9124396	9124451	56	5152	SLC2A5	ENSG00000142583	74.7798	58.7772	-16.0026	-9.13094	-3.01054	0.0522667
chr1	19777591	19778327	737	-31345	CAPZB	ENSG00000077549	15.8688	28.5312	12.6624	35.1376	3.23749	0.0521312	chr1	9187461	9187784	324	1398	GPR157	ENSG00000180758	52.8035	22.6847	-30.1188	-59.3933	-4.20895	0.0547832
chr1	20220328	20220381	54	11321	OTUD3	ENSG00000169914	64.2133	81.8857	17.6724	9.47934	3.18819	0.0531248	chr1	9255918	9256341	424	-38492	H6PD	ENSG00000049239	50.4148	25.9882	-24.4266	-38.6624	-3.02701	0.0652834
chr1	20220760	20221161	402	11753	OTUD3	ENSG00000169914	66.4123	84.6674	18.255	19.4053	3.34125	0.0531248	chr1	9355438	9355863	426	850	SPSB1	ENSG00000171621	58.8628	38.523	-20.3398	-38.3148	-3.03338	0.0596077
chr1	20272855	20272939	85	-22744	PLA2G2E	ENSG00000188784	29.2856	48.5809	19.2953	9.00975	3.00496	0.0575674	chr1	9401241	9401783	543	-9706	SPSB1	ENSG00000171621	91.4009	65.3373	-26.0636	-33.3993	-3.1099	0.0683831
chr1	21210356	21211785	1430	14620	EIF4G3	ENSG00000075151	58.3974	84.3414	25.944	70.2178	4.87493	0.0571112	chr1	9472786	9474597	1812	57019	SPSB1	ENSG00000171621	45.9699	19.9134	-26.0565	-155.335	-3.45285	0.0575371
chr1	21439223	21439613	391	-23521	EIF4G3	ENSG00000075151	46.4647	66.5432	20.0785	13.3926	3.45141	0.0573632	chr1	9836187	9836696	510	-24547	CLSTN1	ENSG00000171603	83.2286	58.9029	-24.3257	-43.6034	-3.01517	0.059649
chr1	21631849	21632371	523	-6356	ECE1	ENSG00000117298	44.9118	66.7919	21.88	53.671	3.98805	0.0561167	chr1	10510691	10510791	101	719	CORT	ENSG00000241563	62.4677	43.2771	-19.1906	-10.0219	-3.13015	0.0542477
chr1	22575181	22575599	419	-104718	WNT4	ENSG00000162552	43.6319	64.0996	20.4677	28.5913	3.24095	0.0589232	chr1	10685295	10685837	543	19295	CASZ1	ENSG00000130940	76.6379	57.2747	-19.3632	-45.9945	-3.05601	0.0530396
chr1	23882632	23883030	399	3254	ID3	ENSG00000117318	10.6909	37.106	26.4151	35.7898	4.76524	0.0557341	chr1	10698014	10698139	126	6993	CASZ1	ENSG00000130940	41.1392	25.8444	-15.2948	-12.8693	-3.07798	0.0537053
chr1	23883338	23883887	550	2397	ID3	ENSG00000117318	26.1224	53.2405	27.118	16.54	4.26529	0.0557341	chr1	11212399	11212686	288	-20783	MTOR	ENSG00000198793	55.4882	29.3755	-26.1127	-15.1558	-3.00426	0.0623161
chr1	24228839	24228996	158	10855	CNR2	ENSG00000188822	30.9355	49.4729	18.5373	29.8667	3.503	0.0532985	chr1	11341715	11341980	266	7723	UBIAD1	ENSG00000120942	62.0909	44.436	-17.6549	-12.0839	-3.00708	0.0521287
chr1	24469102	24469906	805	0	IL22RA1	ENSG00000142677	28.978	50.7037	21.7257	86.5125	4.1647	0.0563588	chr1	11797359	11797908	550	1126	AGTRAP	ENSG00000177674	54.7557	36.2832	-18.4725	-25.9361	-3.11241	0.0533896
chr1	25868370	25868555	186	-1515	LDLRAP1	ENSG00000157978	47.278	64.8779	17.5998	9.31465	3.15349	0.0522389	chr1	11882701	11882783	83	-15723	MTHFR	ENSG00000177000	82.9418	62.6776	-20.2642	-15.5533	-3.07163	0.0524318
chr1	25905931	25907222	1292	35859	LDLRAP1	ENSG00000157978	33.4378	54.0926	20.6547	80.6436	4.01713	0.0525852	chr1	12073271	12074009	739	-5513	MIIP	ENSG00000116691	69.5227	47.1455	-22.3773	-49.7042	-3.17069	0.0550708
chr1	26848042	26848240	199	-8017	RPS6KA1	ENSG00000117676	56.905	72.6449	15.7399	27.2653	3.03774	0.0521287	chr1	12203828	12203981	154	17871	TNFRSF8	ENSG00000120949	71.6436	52.5015	-19.1421	-27.7102	-3.01357	0.0697344
chr1	28498671	28499749	1079	3949	PTAFR	ENSG00000169403	38.9833	63.6358	24.6524	82.2234	5.31921	0.0522868	chr1	12256419	12257153	735	29358	TNFRSF1B	ENSG00000028137	83.0156	64.498	-18.5175	-81.9231	-3.25749	0.0552635
chr1	29254660	29255107	448	13568	EPB41	ENSG00000159023	50.6161	72.6857	22.0697	12.9038	4.43611	0.0554875	chr1	12373887	12374442	556	36708	VPS13D	ENSG00000048707	84.0013	64.0632	-19.9382	-27.5954	-3.27058	0.0530355
chr1	29483181	29483584	404	24825	SRSF4	ENSG00000116350	47.0598	64.8387	17.7789	33.9707	3.44029	0.0521287	chr1	12608788	12609740	953	46580	DHRS3	ENSG00000162496	49.284	10.848	-38.436	-317.969	-3.15116	0.054048
chr1	31673605	31673743	139	-6837	NKAIN1	ENSG00000084628	35.6424	52.2777	16.6353	21.5307	3.11633	0.0568237	chr1	13920013	13920140	128	8045	PDPN	ENSG00000162493	35.4834	16.506	-18.9774	-18.6445	-3.00772	0.0611496
chr1	32235447	32236140	694	-4952	BAI2	ENSG00000121753	50.2074	73.0102	22.8028	64.2951	4.44075	0.0602952	chr1	14101858	14102228	371	3636	PRDM2	ENSG00000116731	68.5426	49.0063	-19.5364	-19.2131	-3.10235	0.0533897
chr1	32970198	32970548	351	-34479	ZBTB8A	ENSG00000160062	66.3145	85.3671	19.0526	38.4808	3.33992	0.0593439	chr1	14609005	14609119	115	-316080	KAZN	ENSG00000189337	46.0159	31.5661	-14.4497	-9.60125	-3.15226	0.0604279
chr1	33078787	33079098	312	37062	ZBTB8OS	ENSG00000176261	63.3585	82.2147	18.8562	10.5595	4.12674	0.0521287	chr1	14926937	14927342	406	1723	KAZN	ENSG00000189337	50.6894	27.6196	-23.0698	-27.8228	-3.01195	0.0659214
chr1	33266753	33267230	478	-15137	S100PBP	ENSG00000116497	44.0942	67.226	23.1318	32.2565	3.78172	0.0605756	chr1	15016566	15016992	427	91352	KAZN	ENSG00000189337	64.9466	44.2755	-20.6711	-48.8353	-3.02362	0.0756652
chr1	33454785	33455177	393	15516	FKSG48	ENSG00000267885	51.2009	70.1019	18.901	15.4072	3.11174	0.0547367	chr1	15269367	15269987	621	-2427	KAZN	ENSG00000189337	78.4031	63.313	-15.0901	-40.3428	-3.01218	0.066573
chr1	35965211	35966044	834	6423	KIAA0319L	ENSG00000142687	43.0825	63.6415	20.559	26.4837	3.98947	0.0521287	chr1	15294958	15295343	386	22542	KAZN	ENSG00000189337	73.2224	61.5456	-11.6768	-24.9445	-3.024	0.0611808
chr1	36424986	36425196	211	28126	AGO3	ENSG00000126070	53.9774	83.5584	29.581	17.0595	5.7001	0.0522572	chr1	15541017	15541748	732	-32019	FHAD1	ENSG00000142621	62.1882	27.2577	-34.9306	-169.153	-3.20955	0.0625562
chr1	36581064	36581318	255	9502	COL8A2	ENSG00000171812	37.9329	57.4925	19.5596	21.3086	3.08842	0.0673521	chr1	15737855	15738665	811	1093	EFHD2	ENSG00000142634	71.0406	44.2264	-26.8142	-57.6657	-3.0817	0.0570202
chr1	38138326	38138983	658	17192	C1orf109	ENSG00000116922	45.0793	65.4841	20.4048	31.604	3.24462	0.056262	chr1	15748242	15748395	154	11480	EFHD2	ENSG00000142634	69.3875	45.0228	-24.3647	-15.2353	-3.02319	0.0629395
chr1	38508814	38509819	1006	2630	POU3F1	ENSG00000185668	40.0084	65.9826	25.9742	73.017	6.3145	0.0537333	chr1	16159738	16160089	352	-14269	SPEN	ENSG00000065526	79.5851	47.267	-32.3181	-67.5358	-3.10168	0.0816315
chr1	38513756	38513890	135	-1305	POU3F1	ENSG00000185668	22.8019	46.8663	24.0644	17.2927	4.96841	0.0521287	chr1	16274668	16275839	1172	-3744	ZBTB17	ENSG00000116809	58.7466	30.3078	-28.4388	-126.245	-3.05574	0.0632944
chr1	39742005	39742446	442	7805	MACF1	ENSG00000127603	61.1152	77.4608	16.3456	20.7463	3.68838	0.0522417	chr1	16291912	16293082	1171	9491	ZBTB17	ENSG00000116809	58.7059	35.8847	-22.8212	-77.3537	-3.09013	0.0534719
chr1	39980034	39980239	206	22715	BMP8A	ENSG00000183682	25.5356	55.3253	29.7897	25.7694	5.06894	0.0749354	chr1	16507732	16507942	211	25078	ARHGEF19	ENSG00000142632	71.6586	55.1504	-16.5082	-21.6566	-3.00611	0.0547618
chr1	41239491	41239656	166	-10027	KCNQ4	ENSG00000117013	54.8544	70.2284	15.374	18.4139	3.08543	0.0522368	chr1	16604913	16605498	586	-24824	FBXO42	ENSG00000037637	84.7037	63.4471	-21.2565	-43.5654	-3.02819	0.0522589
chr1	41492447	41493630	1184	-3537	SLFNL1	ENSG00000171790	63.9796	85.2037	21.2241	105.19	5.64373	0.0524321	chr1	16826553	16826733	181	-38827	FAM231B	ENSG00000268674	75.4401	53.8279	-21.6122	-52.0294	-3.00876	0.061376
chr1	41850952	41851666	715	23357	FOXO6	ENSG00000204060	27.2542	53.9671	26.7129	42.6269	3.90019	0.0592005	chr1	16846919	16847234	316	-18326	FAM231B	ENSG00000268674	47.5764	28.6848	-18.8915	-58.6233	-3.03561	0.0557084
chr1	42079580	42079684	105	86987	HIVEP3	ENSG00000127124	64.7146	83.3955	18.6809	9.08772	3.04269	0.0537042	chr1	16971585	16971625	41	-27872	FAM231A	ENSG00000237847	61.2327	44.8811	-16.3516	-15.2857	-3.01005	0.0549902
chr1	43217457	43218012	556	2645	LEPRE1	ENSG00000117385	64.6048	88.4036	23.7988	45.833	4.47297	0.0577816	chr1	17188330	17188409	80	-60035	CROCC	ENSG00000058453	55.2354	34.5225	-20.7129	-15.149	-3.00275	0.0560686
chr1	43701214	43701391	178	-34273	TMEM125	ENSG00000179178	50.5004	67.3097	16.8093	12.6104	3.19864	0.0540434	chr1	17200315	17200398	84	-48046	CROCC	ENSG00000058453	55.6174	39.6808	-15.9366	-21.6276	-3.01363	0.0521287
chr1	44006954	44007963	1010	-2737	PTPRF	ENSG00000142949	56.6728	79.3083	22.6355	77.1204	4.59568	0.054234	chr1	17381106	17381218	113	-440	SDHB	ENSG00000117118	51.7495	34.1871	-17.5624	-16.2355	-3.05419	0.0551588
chr1	46015979	46016017	39	-197	AKR1A1	ENSG00000117448	46.1433	65.1178	18.9745	16.1404	3.37437	0.0582925	chr1	17867542	17867626	85	1211	ARHGEF10L	ENSG00000074964	36.1295	18.5606	-17.5689	-12.9715	-3.08178	0.0549097
chr1	46149925	46150233	309	1974	GPBP1L1	ENSG00000159592	44.7963	64.4368	19.6405	11.851	4.42945	0.0530702	chr1	17894624	17894913	290	-12134	ARHGEF10L	ENSG00000074964	84.171	66.7149	-17.4561	-12.8456	-3.13963	0.0525484
chr1	46861677	46863336	1660	1739	FAAH	ENSG00000117480	32.478	64.046	31.568	124.629	6.28132	0.0611414	chr1	18885170	18885512	343	-71987	PAX7	ENSG00000009709	49.1623	34.9374	-14.2249	-37.7695	-3.01488	0.0555679
chr1	47078935	47079028	94	1776	MOB3C	ENSG00000142961	36.896	54.3392	17.4432	22.2383	3.27283	0.0602352	chr1	19275618	19277516	1899	4675	IFFO2	ENSG00000169991	50.3429	17.3284	-33.0145	-237.894	-3.23892	0.0802865
chr1	47915053	47915410	358	13363	FOXD2	ENSG00000186564	45.0129	66.6691	21.6561	27.9333	3.18684	0.0542215	chr1	19280802	19281211	410	980	IFFO2	ENSG00000169991	66.5302	35.526	-31.0042	-34.634	-3.91321	0.052853
chr1	50887916	50888024	109	-611	DMRTA2	ENSG00000142700	20.3089	33.6628	13.3539	12.5573	3.23333	0.0521287	chr1	19281539	19281949	411	242	IFFO2	ENSG00000169991	51.7214	24.4809	-27.2406	-45.8094	-3.07157	0.0527354
chr1	51985888	51986350	463	-887	EPS15	ENSG00000085832	41.1202	66.0686	24.9484	33.2522	5.5092	0.0568512	chr1	19397758	19397963	206	10770	UBR4	ENSG00000127481	60.1567	43.6437	-16.513	-19.035	-3.10474	0.0521287
chr1	52083740	52084115	376	958	OSBPL9	ENSG00000117859	51.4784	72.9522	21.4738	56.2196	3.67004	0.0522404	chr1	19546106	19546479	374	3520	EMC1	ENSG00000127463	65.1858	40.6298	-24.556	-21.5133	-3.00561	0.0623555
chr1	52834756	52834950	195	-2890	CC2D1B	ENSG00000154222	43.0612	63.2231	20.1618	13.9997	3.74553	0.0547907	chr1	19637370	19637501	132	899	AKR7A2	ENSG00000053371	62.4585	44.692	-17.7665	-9.56308	-3.07931	0.0538192
chr1	53237329	53237431	103	45147	ZYG11B	ENSG00000162378	60.0931	77.5678	17.4747	12.2411	3.06885	0.056195	chr1	19668594	19669086	493	17345	PQLC2	ENSG00000040487	58.3906	32.9501	-25.4405	-60.7175	-3.00044	0.052313
chr1	53581198	53582092	895	26156	SLC1A7	ENSG00000162383	51.5605	68.0785	16.518	75.1719	4.00629	0.0544444	chr1	19680512	19681525	1014	29263	PQLC2	ENSG00000040487	80.0628	51.1236	-28.9392	-63.7583	-3.0395	0.0546911
chr1	54040524	54040870	347	115451	DMRTB1	ENSG00000143006	50.6539	72.1788	21.5249	18.2021	3.06814	0.055063	chr1	19708398	19709044	647	3246	CAPZB	ENSG00000077549	74.4359	50.0655	-24.3704	-51.1781	-3.15339	0.0560374
chr1	54136969	54137264	296	62612	GLIS1	ENSG00000174332	57.3375	82.2512	24.9137	13.2103	3.32919	0.0558198	chr1	19840771	19840953	183	-28704	CAPZB	ENSG00000077549	62.495	45.9564	-16.5386	-18.3613	-3.02509	0.054225
chr1	54587962	54588100	139	17993	AL161915.1	ENSG00000212670	26.8739	46.8568	19.9829	33.5689	3.45521	0.0537162	chr1	19978788	19978971	184	4683	NBL1	ENSG00000158747	72.5789	49.5474	-23.0315	-22.3239	-3.07077	0.0560309
chr1	54699543	54699623	81	-4086	SSBP3-AS1	ENSG00000198711	62.9544	86.6066	23.6523	15.1706	4.31651	0.0655938	chr1	20210063	20210458	396	1056	OTUD3	ENSG00000169914	66.6362	41.7437	-24.8925	-34.7143	-3.06894	0.0538603
chr1	54822058	54822199	142	48977	SSBP3	ENSG00000157216	55.9365	75.4533	19.5168	24.3241	3.06265	0.0574358	chr1	20670636	20671085	450	41061	VWA5B1	ENSG00000158816	53.5744	26.8497	-26.7247	-28.9613	-3.15947	0.0652987
chr1	54894430	54894957	528	-15277	SSBP3	ENSG00000157216	57.7866	73.2398	15.4531	41.3689	3.27626	0.0521287	chr1	21036805	21037263	459	6720	KIF17	ENSG00000117245	58.2526	41.0368	-17.2157	-35.4397	-3.00412	0.0524178
chr1	54952650	54952901	252	-60999	ACOT11	ENSG00000162390	40.4901	66.3306	25.8405	26.431	3.39324	0.0715218	chr1	21349454	21349642	189	27752	EIF4G3	ENSG00000075151	72.4741	47.196	-25.2782	-10.3254	-3.33079	0.0631183
chr1	59549058	59549264	207	-213045	FGGY	ENSG00000172456	53.5757	72.5978	19.0221	16.1179	3.37556	0.0521835	chr1	21396243	21396572	330	-18755	EIF4G3	ENSG00000075151	63.1493	38.3591	-24.7902	-21.0309	-3.98331	0.0532763
chr1	59549675	59550124	450	-212185	FGGY	ENSG00000172456	53.2213	72.4917	19.2704	26.0166	3.44717	0.0521586	chr1	21599722	21600822	1101	5219	ECE1	ENSG00000117298	84.2453	58.4051	-25.8402	-132.018	-3.30621	0.0521367
chr1	60393405	60394132	728	-942	CYP2J2	ENSG00000134716	35.8081	54.863	19.0549	23.3822	3.60104	0.0541127	chr1	21856050	21857219	1170	20184	ALPL	ENSG00000162551	50.4941	32.8119	-17.6822	-81.2845	-3.00453	0.0530928
chr1	62637110	62637393	284	-23109	L1TD1	ENSG00000240563	46.2781	67.5345	21.2564	28.1433	3.19938	0.0581391	chr1	21879879	21880371	493	-203	ALPL	ENSG00000162551	42.4458	27.3987	-15.0471	-24.1794	-3.29624	0.0547204
chr1	62792869	62793733	865	-7783	KANK4	ENSG00000132854	45.9683	68.1058	22.1375	97.9723	3.70493	0.0540055	chr1	21894079	21894730	652	-2065	ALPL	ENSG00000162551	52.1046	35.7032	-16.4014	-58.1384	-3.09203	0.0541361
chr1	63953180	63953672	493	35178	ITGB3BP	ENSG00000142856	44.9927	65.3245	20.3318	24.9579	3.13815	0.0553282	chr1	21977797	21977953	157	375	RAP1GAP	ENSG00000076864	49.1739	29.0296	-20.1443	-29.747	-3.056	0.0521287
chr1	64378483	64378619	137	138768	ROR1	ENSG00000185483	39.3281	59.1058	19.7777	10.3006	3.5908	0.0541014	chr1	22585837	22586036	200	-115374	WNT4	ENSG00000162552	51.3577	34.5146	-16.8431	-24.2451	-3.00563	0.0598644
chr1	64379183	64379597	415	139468	ROR1	ENSG00000185483	38.3648	62.6389	24.2741	47.2561	4.32859	0.0531407	chr1	22618452	22619107	656	-147989	WNT4	ENSG00000162552	57.2403	37.106	-20.1343	-63.2509	-3.39929	0.0529167
chr1	64379958	64380251	294	140243	ROR1	ENSG00000185483	48.7323	68.1589	19.4266	17.0814	3.74901	0.052151	chr1	23495622	23495727	106	-270	LUZP1	ENSG00000169641	60.209	41.398	-18.811	-27.8626	-3.01702	0.0575936
chr1	82125131	82125667	537	-39787	LPHN2	ENSG00000117114	51.5915	75.6932	24.1017	20.3032	3.64364	0.0526921	chr1	24087566	24087607	42	-17287	PITHD1	ENSG00000057757	73.4959	52.7679	-20.728	-9.02773	-3.00909	0.0535235
chr1	85245323	85245637	315	86204	LPAR3	ENSG00000171517	49.5441	68.2829	18.7388	18.6457	3.14331	0.0573371	chr1	24281212	24282268	1057	3280	CNR2	ENSG00000188822	66.6442	42.9869	-23.6572	-91.0893	-3.41064	0.0524916
chr1	86862739	86862904	166	-715	ODF2L	ENSG00000122417	39.1931	60.7328	21.5397	13.9024	3.64636	0.0538536	chr1	24346077	24346546	470	-39230	SRSF10	ENSG00000188529	51.0356	33.2075	-17.8281	-22.4632	-3.03727	0.0540112
chr1	87258103	87258264	162	87524	SH3GLB1	ENSG00000097033	62.2585	79.267	17.0086	19.3255	3.26348	0.0531888	chr1	24648227	24648435	209	-1094	GRHL3	ENSG00000158055	59.4373	32.4015	-27.0358	-73.2452	-3.04485	0.0598084
chr1	88115005	88115418	414	317653	LMO4	ENSG00000143013	41.2665	65.1907	23.9242	21.6817	3.13231	0.0558593	chr1	24701540	24702094	555	4218	STPG1	ENSG00000001460	83.935	65.4422	-18.4928	-35.0478	-3.01728	0.0580838
chr1	89152169	89152365	197	1912	PKN2	ENSG00000065243	12.2115	35.7916	23.5801	12.5848	4.75887	0.0525798	chr1	25655489	25655528	40	-8879	TMEM50A	ENSG00000183726	65.7153	37.5699	-28.1454	-15.4827	-3.77406	0.0554993
chr1	89473148	89473525	378	3992	GBP3	ENSG00000117226	65.6129	82.1902	16.5773	9.11221	3.05523	0.0523056	chr1	25875649	25876481	833	5577	LDLRAP1	ENSG00000157978	74.1502	53.8057	-20.3446	-66.2485	-3.00111	0.0571795
chr1	90337479	90338129	651	25339	LRRC8D	ENSG00000171492	46.3945	73.9888	27.5944	41.5941	4.53558	0.0556292	chr1	25945029	25945113	85	687	MAN1C1	ENSG00000117643	41.9425	22.8895	-19.053	-14.6287	-3.60904	0.0541027
chr1	92155330	92155983	654	171166	TGFBR3	ENSG00000069702	63.6915	78.9639	15.2725	31.9515	3.30968	0.0537657	chr1	26037372	26037465	94	1278	MAN1C1	ENSG00000117643	84.0745	61.9306	-22.1439	-10.7151	-3.42557	0.0553346
chr1	93221790	93222087	298	35863	EVI5	ENSG00000067208	65.5674	86.3091	20.7417	18.7563	3.14487	0.0598426	chr1	26037792	26038681	890	1698	MAN1C1	ENSG00000117643	81.2438	54.9626	-26.2812	-63.6295	-3.02878	0.0568784
chr1	95068029	95068143	115	-60672	F3	ENSG00000117525	35.8018	56.3315	20.5297	15.3098	3.07969	0.0556057	chr1	26092120	26092682	563	-33984	SEPN1	ENSG00000162430	54.6005	37.8111	-16.7894	-38.9998	-3.06615	0.0563699
chr1	95068465	95068741	277	-61108	F3	ENSG00000117525	37.8584	58.7525	20.8941	9.41749	3.15349	0.0555591	chr1	26248837	26248938	102	-15354	STMN1	ENSG00000117632	56.6355	39.6071	-17.0284	-13.4209	-3.17576	0.0540534
chr1	109187354	109187494	141	16182	HENMT1	ENSG00000162639	48.8677	66.6682	17.8005	9.04678	3.02314	0.0525977	chr1	27902704	27902981	278	27120	AHDC1	ENSG00000126705	59.3672	31.0191	-28.3481	-38.9272	-3.13044	0.0564041
chr1	109420942	109421111	170	911	GPSM2	ENSG00000121957	6.81958	29.632	22.8124	19.9328	5.07611	0.0560467	chr1	28051680	28051833	154	-656	FAM76A	ENSG00000009780	65.3162	48.2779	-17.0383	-16.1013	-3.05766	0.0541404
chr1	109421497	109421676	180	1466	GPSM2	ENSG00000121957	34.6002	66.5266	31.9264	16.7737	6.04314	0.0560969	chr1	28053664	28053989	326	1095	FAM76A	ENSG00000009780	77.1465	42.7957	-34.3508	-19.7685	-5.42946	0.0527352
chr1	109824795	109825014	220	-493	PSRC1	ENSG00000134222	16.1561	33.7109	17.5547	20.5333	3.74234	0.0521287	chr1	28561873	28561935	63	-684	ATPIF1	ENSG00000130770	51.4467	32.4558	-18.9909	-15.4506	-3.01638	0.0556447
chr1	109941455	109941834	380	-881	SORT1	ENSG00000134243	49.1858	65.0942	15.9084	24.2879	3.93307	0.0525185	chr1	28587439	28588100	662	1400	SESN2	ENSG00000130766	72.5326	46.4699	-26.0626	-56.3011	-3.41327	0.0538254
chr1	112148991	112149487	497	-12911	RAP1A	ENSG00000116473	19.622	41.0899	21.4679	20.0858	3.56934	0.0610252	chr1	29062431	29062572	142	-560	YTHDF2	ENSG00000198492	50.7281	30.9313	-19.7968	-16.673	-3.23314	0.0554771
chr1	113525976	113526684	709	-26340	SLC16A1	ENSG00000155380	61.9927	81.2205	19.2278	26.612	3.52124	0.0521287	chr1	29509200	29509216	17	-700	SRSF4	ENSG00000116350	69.7194	51.5407	-18.1786	-12.169	-3.00094	0.0547776
chr1	114193142	114193380	239	62569	PHTF1	ENSG00000116793	56.2568	76.4146	20.1578	10.7056	3.64539	0.0535424	chr1	31768726	31768877	152	739	SNRNP40	ENSG00000060688	59.1035	23.3518	-35.7517	-29.2876	-4.12655	0.0568192
chr1	114193684	114194108	425	61841	PHTF1	ENSG00000116793	58.7569	78.7314	19.9745	21.1067	3.63016	0.0536311	chr1	32055010	32055287	278	12870	TINAGL1	ENSG00000142910	65.469	39.6798	-25.7891	-43.0164	-3.03417	0.0653039
chr1	115759846	115760864	1019	119992	NGF	ENSG00000134259	43.2342	65.2855	22.0513	57.8944	4.21592	0.0545892	chr1	32091950	32092196	247	7155	HCRTR1	ENSG00000121764	60.694	35.971	-24.7229	-35.9313	-3.07006	0.0705638
chr1	115997506	115998222	717	-116648	NGF	ENSG00000134259	38.1426	58.4996	20.357	45.689	3.33972	0.0644794	chr1	32181898	32182289	392	-11977	COL16A1	ENSG00000084636	65.752	46.873	-18.879	-44.8447	-3.06334	0.0529241
chr1	120189522	120189575	54	820	ZNF697	ENSG00000143067	33.7059	54.2155	20.5096	13.204	3.42373	0.0573135	chr1	32238702	32238902	201	-8207	BAI2	ENSG00000121753	64.4487	42.6086	-21.8401	-33.8122	-3.15276	0.0576023
chr1	120255834	120256272	439	1323	PHGDH	ENSG00000092621	17.9937	41.9087	23.915	50.93	4.95272	0.0534889	chr1	32705596	32705760	165	-7073	FAM167B	ENSG00000183615	58.8319	40.515	-18.3169	-34.4901	-3.07673	0.0523045
chr1	120256620	120256898	279	2109	PHGDH	ENSG00000092621	43.1695	63.5412	20.3717	14.0752	4.29849	0.0534889	chr1	32861146	32861373	228	-1096	BSDC1	ENSG00000160058	59.2796	38.6062	-20.6734	-30.4804	-3.19367	0.0539875
chr1	120614814	120614945	132	-2573	NOTCH2	ENSG00000134250	66.9485	84.4797	17.5312	12.3369	3.0953	0.0637447	chr1	32965505	32965643	139	34834	ZBTB8B	ENSG00000273274	50.2126	29.2606	-20.952	-37.3384	-3.01535	0.0524394
chr1	150516298	150516929	632	-4954	ADAMTSL4	ENSG00000143382	38.1075	72.7131	34.6056	60.4435	5.11617	0.0718673	chr1	33591903	33592306	404	44051	ADC	ENSG00000142920	78.5083	55.9161	-22.5922	-15.7062	-3.23608	0.0567676
chr1	153861131	153861258	128	34192	GATAD2B	ENSG00000143614	59.425	75.2939	15.8689	9.39419	3.15668	0.0540048	chr1	33799686	33800349	664	-12986	A3GALT2	ENSG00000184389	54.907	22.9206	-31.9863	-93.344	-4.054	0.0592155
chr1	153894021	153894095	75	1355	GATAD2B	ENSG00000143614	14.3477	30.4226	16.0749	9.23651	3.1729	0.0549152	chr1	36275003	36275070	68	1229	AGO4	ENSG00000134698	67.0674	46.4692	-20.5982	-15.2653	-3.47176	0.0521727
chr1	154133974	154134526	553	-6381	NUP210L	ENSG00000143552	75.5673	95.0827	19.5154	32.0617	3.2758	0.0563932	chr1	36787678	36787858	181	-1476	RP11-268J15.5	ENSG00000116883	38.6148	19.601	-19.0138	-27.2513	-3.00584	0.0522573
chr1	155037284	155037734	451	1046	EFNA4	ENSG00000243364	48.2658	69.0248	20.7589	20.4867	5.10694	0.0540063	chr1	36853187	36853589	403	-1689	STK40	ENSG00000196182	67.7869	45.5246	-22.2623	-29.9516	-3.25877	0.0535361
chr1	155211040	155211079	40	0	GBA	ENSG00000177628	32.066	49.528	17.462	9.24833	3.08834	0.0533188	chr1	37942047	37942344	298	1893	ZC3H12A	ENSG00000163874	51.1619	30.5545	-20.6074	-13.4977	-3.14484	0.0526881
chr1	155491136	155491910	775	40412	ASH1L	ENSG00000116539	47.376	70.5046	23.1286	43.389	4.64906	0.0560788	chr1	38000170	38000195	26	19707	SNIP1	ENSG00000163877	68.2946	50.5564	-17.7382	-9.30703	-3.10006	0.0534854
chr1	156896916	156897130	215	6473	LRRC71	ENSG00000160838	41.2007	66.3143	25.1136	17.0015	3.61672	0.0585204	chr1	38170342	38171156	815	12188	CDCA8	ENSG00000134690	80.8805	59.0464	-21.8341	-38.0052	-3.11199	0.0599659
chr1	161284943	161284962	20	764	SDHC	ENSG00000143252	21.9766	41.4533	19.4767	11.9988	4.20953	0.0535625	chr1	39876716	39877065	350	564	KIAA0754	ENSG00000255103	66.5195	46.1965	-20.3231	-9.28378	-3.03277	0.0543044
chr1	161392497	161392649	153	-54832	C1orf192	ENSG00000188931	33.1341	53.4949	20.3607	23.7783	3.49202	0.0597174	chr1	39932760	39933080	321	5067	MACF1	ENSG00000127603	60.6994	30.3833	-30.3161	-68.7884	-3.43205	0.0695644
chr1	161575992	161576063	72	10648	FCGR2C	ENSG00000244682	14.0993	32.2102	18.1108	26.6815	3.58767	0.0598569	chr1	39963907	39965042	1136	6588	BMP8A	ENSG00000183682	64.4784	39.4203	-25.0581	-107.324	-3.13862	0.0705474
chr1	162764563	162764815	253	3983	HSD17B7	ENSG00000132196	46.5083	64.6559	18.1476	19.9678	3.47951	0.05603	chr1	39974677	39975687	1011	17358	BMP8A	ENSG00000183682	64.7464	39.3365	-25.4099	-118.819	-3.10475	0.0641154
chr1	162793304	162793514	211	32724	HSD17B7	ENSG00000132196	43.2761	63.4696	20.1935	14.9517	3.94005	0.0529669	chr1	40075631	40076089	459	22582	HEYL	ENSG00000163909	54.1513	29.9858	-24.1655	-122.535	-3.03401	0.0521746
chr1	164600989	164601440	452	770	PBX1	ENSG00000185630	44.0589	60.3645	16.3056	24.3692	3.0912	0.0573442	chr1	40098194	40098351	158	320	HEYL	ENSG00000163909	62.7035	40.3645	-22.339	-18.779	-3.13532	0.0533627
chr1	167682470	167682742	273	-8444	MPZL1	ENSG00000197965	32.8054	53.7829	20.9775	40.5685	4.0084	0.0535791	chr1	40149301	40149598	298	7762	HPCAL4	ENSG00000116983	41.2343	23.6399	-17.5945	-75.5657	-3.00852	0.0581661
chr1	172504310	172504863	554	1952	SUCO	ENSG00000094975	16.0309	38.1756	22.1447	16.0766	4.45082	0.0543816	chr1	41349549	41349987	439	-21530	CITED4	ENSG00000179862	54.5599	31.1821	-23.3778	-162.951	-3.0221	0.0521384
chr1	179009282	179009490	209	14250	FAM20B	ENSG00000116199	69.2575	91.2829	22.0255	46.343	3.99262	0.0575929	chr1	41485346	41485585	240	1801	SLFNL1	ENSG00000171790	86.4371	66.5231	-19.914	-13.5905	-3.02322	0.052355
chr1	179260906	179261075	170	-1849	SOAT1	ENSG00000057252	49.275	65.7737	16.4988	10.0977	3.53039	0.0521287	chr1	41861676	41862167	492	34081	FOXO6	ENSG00000204060	52.1793	38.8364	-13.3429	-55.6834	-3.08189	0.0619985
chr1	180237366	180237401	36	37944	LHX4	ENSG00000121454	42.3994	57.1287	14.7294	9.12167	3.05305	0.0548414	chr1	42073658	42074398	741	92273	HIVEP3	ENSG00000127124	73.9355	60.0025	-13.933	-27.7979	-3.02699	0.0521287
chr1	180896617	180897364	748	0	KIAA1614	ENSG00000135835	35.6996	56.1348	20.4352	39.9215	3.58481	0.0579598	chr1	42798721	42799224	504	1411	FOXJ3	ENSG00000198815	58.7463	34.3236	-24.4227	-19.5617	-3.21139	0.0522936
chr1	181020549	181021219	671	17409	MR1	ENSG00000153029	58.711	81.5708	22.8598	40.5236	3.92745	0.0554763	chr1	43425484	43425718	235	-953	SLC2A1	ENSG00000117394	62.1696	41.6213	-20.5483	-47.275	-3.03664	0.0541426
chr1	181113552	181114136	585	55913	IER5	ENSG00000162783	47.1713	67.0596	19.8883	28.1867	3.5996	0.0547322	chr1	44300661	44301644	984	-63615	ST3GAL3	ENSG00000126091	75.9678	52.1065	-23.8613	-41.5309	-3.25145	0.0620986
chr1	184616196	184616666	471	107034	EDEM3	ENSG00000116406	59.3029	78.2165	18.9137	33.1969	3.4205	0.0535359	chr1	45242356	45242418	63	1110	RPS8	ENSG00000142937	44.2925	26.5643	-17.7282	-18.5387	-3.0005	0.0533844
chr1	200078985	200079556	572	66046	NR5A2	ENSG00000116833	30.4526	52.9325	22.4799	18.2944	3.09783	0.052137	chr1	45278844	45279285	442	4648	BTBD19	ENSG00000222009	60.5592	37.4589	-23.1003	-181.043	-3.12149	0.0555391
chr1	200546690	200547118	429	42743	KIF14	ENSG00000118193	69.3376	90.3236	20.986	46.1982	4.46302	0.0539824	chr1	45732177	45732246	70	-59948	ZSWIM5	ENSG00000162415	61.0843	41.6348	-19.4495	-9.63881	-3.16811	0.0521287
chr1	201709765	201709860	96	768	NAV1	ENSG00000134369	15.8285	33.0436	17.2151	15.2394	3.06447	0.0581422	chr1	45732779	45733055	277	-59489	HPDL	ENSG00000186603	65.9744	43.781	-22.1934	-22.3354	-3.62607	0.0521287
chr1	201908183	201908834	652	6880	LMOD1	ENSG00000163431	30.7551	51.4659	20.7107	24.8669	3.83221	0.0651577	chr1	45955574	45955733	160	1081	TESK2	ENSG00000070759	54.5171	38.1384	-16.3787	-16.4877	-3.08528	0.0521287
chr1	202046248	202046497	250	-45488	GPR37L1	ENSG00000170075	53.3844	71.0054	17.6209	32.4998	3.32827	0.0521287	chr1	46668235	46668355	121	-650	LURAP1	ENSG00000171357	67.8558	43.5855	-24.2702	-23.7888	-3.58388	0.0560636
chr1	202975330	202975654	325	-859	TMEM183A	ENSG00000163444	21.5076	39.5863	18.0787	18.78	4.27462	0.0533058	chr1	47901721	47902085	365	31	FOXD2	ENSG00000186564	73.8247	50.8311	-22.9936	-11.7949	-3.35858	0.0603344
chr1	203045221	203045340	120	9823	MYOG	ENSG00000122180	27.4697	48.7408	21.2711	29.4278	3.41967	0.0533213	chr1	47904985	47905871	887	3295	FOXD2	ENSG00000186564	59.0993	26.0829	-33.0164	-210.687	-3.08361	0.103613
chr1	205209342	205209504	163	-6119	TMCC2	ENSG00000133069	33.2319	54.3973	21.1655	20.4005	3.44604	0.0521555	chr1	47998166	47998708	543	96476	FOXD2	ENSG00000186564	53.0126	30.2857	-22.7269	-48.6979	-3.2625	0.0579738
chr1	209881724	209882348	625	3532	HSD11B1	ENSG00000117594	58.1212	77.1055	18.9844	21.5211	3.12641	0.0576999	chr1	48021969	48022552	584	120279	FOXD2	ENSG00000186564	47.817	34.6991	-13.1179	-37.2345	-3.03178	0.0801598
chr1	214169817	214171007	1191	0	PROX1	ENSG00000117707	32.9862	62.9848	29.9985	189.165	5.9168	0.0564658	chr1	48284438	48285280	843	-57147	FLJ00388	ENSG00000273395	48.369	24.1036	-24.2655	-74.3681	-3.04162	0.0767732
chr1	215739607	215739936	330	-798	KCTD3	ENSG00000136636	51.9957	75.4484	23.4528	15.0729	4.37886	0.0570488	chr1	48458225	48458870	646	3696	TRABD2B	ENSG00000269113	57.5753	36.949	-20.6263	-61.6877	-3.0969	0.0627556
chr1	217311825	217312022	198	-727	ESRRG	ENSG00000196482	34.9893	58.8887	23.8994	23.1258	3.49738	0.0630921	chr1	51433232	51433311	80	-1055	CDKN2C	ENSG00000123080	36.0771	13.4116	-22.6655	-9.9436	-3.12038	0.0539801
chr1	217694853	217695102	250	109321	GPATCH2	ENSG00000092978	56.9085	83.3841	26.4755	16.8344	3.54381	0.0618381	chr1	51442278	51443012	735	6661	CDKN2C	ENSG00000123080	70.3416	26.86	-43.4816	-131.159	-3.15719	0.0786432
chr1	218844987	218845254	268	161548	C1orf143	ENSG00000228208	44.3893	66.1516	21.7622	19.815	3.36585	0.0629651	chr1	52194502	52194773	272	-201	OSBPL9	ENSG00000117859	70.829	49.0379	-21.7911	-29.3629	-3.10611	0.0530176
chr1	220444625	220444753	129	1042	RAB3GAP2	ENSG00000118873	49.8219	70.5009	20.679	10.5024	3.7994	0.0537441	chr1	52317630	52317926	297	25764	NRD1	ENSG00000078618	73.8099	51.5959	-22.214	-16.2464	-3.21005	0.0532794
chr1	220982511	220982937	427	12413	2001-03-01	ENSG00000186205	54.8033	73.2195	18.4162	25.756	3.27108	0.0544806	chr1	53307686	53307933	248	-249	ZYG11A	ENSG00000203995	57.0365	38.358	-18.6786	-13.8425	-3.12442	0.0521287
chr1	221054337	221054499	163	0	HLX	ENSG00000136630	14.1388	38.7004	24.5616	28.6618	3.26664	0.0558234	chr1	53526786	53526920	135	-933	PODN	ENSG00000174348	66.6224	49.8059	-16.8165	-12.5826	-3.08927	0.0579009
chr1	221058030	221058079	50	3445	HLX	ENSG00000136630	58.8599	86.8219	27.962	12.151	3.07593	0.0610773	chr1	53528991	53529252	262	1105	PODN	ENSG00000174348	60.8128	34.8435	-25.9693	-50.2753	-3.0699	0.0718662
chr1	222662961	222663054	94	58390	HHIPL2	ENSG00000143512	25.5536	50.2067	24.6531	9.62842	3.25019	0.0685737	chr1	53903554	53903607	54	-21464	DMRTB1	ENSG00000143006	88.0009	70.4872	-17.5136	-9.98336	-3.18316	0.0557278
chr1	224073781	224073879	99	-40106	TP53BP2	ENSG00000143514	63.2716	82.7049	19.4332	9.40596	3.21149	0.05853	chr1	53936262	53936312	51	11189	DMRTB1	ENSG00000143006	52.2547	33.2758	-18.9789	-19.8493	-3.2022	0.0525749
chr1	224411121	224411500	380	40152	DEGS1	ENSG00000143753	38.5836	57.7727	19.189	13.5003	3.59099	0.0602436	chr1	54586755	54587007	253	16786	AL161915.1	ENSG00000212670	75.0103	57.1952	-17.815	-41.3476	-3.00659	0.0521911
chr1	225706917	225707326	410	-90289	LBR	ENSG00000143815	5.89828	34.279	28.3808	66.6478	3.68022	0.0715158	chr1	54728814	54729186	373	-11280	SSBP3	ENSG00000157216	71.8298	53.4538	-18.3761	-47.8875	-3.00662	0.0535085
chr1	225837005	225838930	1926	1487	ENAH	ENSG00000154380	19.5862	66.8322	47.246	195.819	6.77642	0.0694054	chr1	54747095	54747346	252	-29561	SSBP3	ENSG00000157216	80.1555	60.8802	-19.2753	-35.5762	-3.08765	0.0522792
chr1	226896040	226897499	1460	27659	ITPKB	ENSG00000143772	39.5668	56.9361	17.3692	74.7308	4.16884	0.0524616	chr1	54808248	54809161	914	62015	SSBP3	ENSG00000157216	58.644	27.9794	-30.6646	-112.569	-3.01979	0.0686097
chr1	227204673	227204773	101	17644	CDC42BPA	ENSG00000143776	68.8451	89.7479	20.9028	16.0159	3.29103	0.054597	chr1	55678855	55679335	481	1426	USP24	ENSG00000162402	54.6849	35.2317	-19.4532	-23.8459	-3.0757	0.0548918
chr1	227205262	227205898	637	16519	CDC42BPA	ENSG00000143776	68.0332	90.4424	22.4092	24.5414	3.72026	0.054597	chr1	59041718	59042065	348	1100	TACSTD2	ENSG00000184292	50.541	18.4796	-32.0614	-100.162	-3.053	0.0776452
chr1	228136768	228136912	145	-1168	WNT9A	ENSG00000143816	39.3602	56.7403	17.3801	16.2992	3.36846	0.054119	chr1	59613094	59613186	93	-149123	FGGY	ENSG00000172456	59.3936	43.6465	-15.7472	-9.59	-3.0696	0.0547959
chr1	228345802	228346215	414	6997	IBA57-AS1	ENSG00000203684	34.3894	65.7471	31.3578	167.436	3.59799	0.0853996	chr1	61475130	61475626	497	-43875	NFIA	ENSG00000162599	68.1337	51.6031	-16.5305	-19.5598	-3.15095	0.0532943
chr1	230289483	230290089	607	86464	GALNT2	ENSG00000143641	41.8551	59.7113	17.8563	41.4365	3.80655	0.0593706	chr1	61509090	61509670	581	-9831	NFIA	ENSG00000162599	59.1716	27.1279	-32.0437	-242.035	-3.02005	0.0749277
chr1	230301032	230301775	744	98013	GALNT2	ENSG00000143641	48.4762	73.6002	25.124	42.2876	5.161	0.057719	chr1	61914120	61915001	882	41775	NFIA	ENSG00000162599	62.606	38.9041	-23.7019	-67.2547	-3.00526	0.0589222
chr1	233073452	233073742	291	-12627	NTPCR	ENSG00000135778	43.0219	61.9653	18.9434	15.524	3.13703	0.0553435	chr1	62575796	62576842	1047	-83660	L1TD1	ENSG00000240563	62.1435	39.8709	-22.2726	-78.7088	-3.68586	0.0544417
chr1	233155993	233156164	172	38099	PCNXL2	ENSG00000135749	34.9837	54.3672	19.3835	12.06	3.0265	0.06577	chr1	62827622	62827662	41	-42536	KANK4	ENSG00000132854	58.6125	42.1739	-16.4385	-12.206	-3.01941	0.0642307
chr1	233801017	233801767	751	15329	KCNK1	ENSG00000135750	49.5419	73.3593	23.8173	31.621	3.77716	0.0670225	chr1	64127963	64128209	247	39198	PGM1	ENSG00000079739	66.3968	50.7333	-15.6635	-18.2151	-3.02061	0.0544756
chr1	235259401	235259604	204	32646	TOMM20	ENSG00000173726	61.9194	79.3022	17.3829	17.0534	3.65439	0.0527213	chr1	64375226	64375762	537	135511	ROR1	ENSG00000185483	81.3863	63.7147	-17.6716	-25.836	-3.14624	0.0555302
chr1	235290496	235290659	164	1591	TOMM20	ENSG00000173726	28.9874	46.3105	17.3231	10.4196	3.66088	0.0526461	chr1	65322130	65322578	449	78382	RAVER2	ENSG00000162437	75.055	52.1951	-22.8599	-47.1383	-3.21194	0.0560014
chr1	236094014	236094836	823	-47141	LYST	ENSG00000143669	54.1376	74.665	20.5274	64.6855	3.60348	0.0573075	chr1	65466947	65467230	284	-34759	JAK1	ENSG00000162434	90.7649	71.024	-19.7409	-56.4852	-3.22358	0.0573963
chr1	236193924	236193995	72	34413	NID1	ENSG00000116962	53.966	66.4042	12.4381	9.90992	3.38634	0.0525247	chr1	67000139	67000765	627	173	SGIP1	ENSG00000118473	62.6896	26.2544	-36.4353	-29.0448	-4.92234	0.0544607
chr1	244269928	244270880	953	42295	AL590483.1	ENSG00000268146	32.0979	51.7272	19.6292	54.3462	3.95312	0.0593178	chr1	67169989	67170332	344	9611	SGIP1	ENSG00000118473	76.1078	59.8012	-16.3066	-13.7522	-3.26625	0.0521287
chr1	244539188	244539791	604	23250	C1orf100	ENSG00000173728	39.5235	61.3783	21.8547	31.5116	4.40612	0.0548172	chr1	67170825	67171131	307	10447	SGIP1	ENSG00000118473	75.3933	59.0526	-16.3407	-17.1363	-3.28792	0.0521287
chr1	245679306	245679961	656	5001	KIF26B	ENSG00000162849	56.905	79.708	22.803	65.8565	4.06998	0.0682366	chr1	67243705	67244186	482	22752	INSL5	ENSG00000172410	57.3297	36.3091	-21.0206	-30.0989	-4.19361	0.0556284
chr1	245727520	245728032	513	53215	KIF26B	ENSG00000162849	58.9451	78.5947	19.6496	56.659	3.76398	0.0651718	chr1	67244596	67244844	249	22094	INSL5	ENSG00000172410	56.6258	37.7043	-18.9216	-19.1893	-3.5833	0.0568583
chr1	245753710	245754144	435	79405	KIF26B	ENSG00000162849	37.5677	68.7332	31.1655	48.2627	4.27173	0.0681605	chr1	68152885	68153169	285	2000	GADD45A	ENSG00000116717	52.3318	31.9483	-20.3835	-12.3957	-3.85954	0.0540175
chr1	245761799	245761972	174	87494	KIF26B	ENSG00000162849	35.9514	56.22	20.2686	31.461	3.2207	0.0568313	chr1	74929641	74930034	394	18998	LRRC53	ENSG00000162621	46.9312	35.4023	-11.5289	-21.8719	-3.07364	0.0569653
chr1	245847940	245848211	272	173635	KIF26B	ENSG00000162849	50.816	70.7814	19.9655	26.052	3.93745	0.0557056	chr1	76189334	76189448	115	-587	ACADM	ENSG00000117054	86.8722	62.5639	-24.3083	-13.8519	-3.33028	0.054303
chr1	246491221	246491586	366	27050	SMYD3	ENSG00000185420	72.0152	91.9783	19.9631	40.5281	3.57949	0.052166	chr1	77640949	77641158	210	43952	PIGK	ENSG00000142892	84.9161	66.3102	-18.606	-9.18049	-3.01178	0.0521287
chr1	246492098	246492238	141	26398	SMYD3	ENSG00000185420	71.87	92.2865	20.4166	10.5474	3.57507	0.052166	chr1	78512553	78512735	183	966	GIPC2	ENSG00000137960	59.4545	36.5771	-22.8774	-12.2392	-3.96948	0.0521287
chr1	246513697	246514457	761	4179	SMYD3	ENSG00000185420	51.3108	70.3487	19.0378	47.8647	3.23655	0.0521287	chr1	79306292	79307176	885	76393	ELTD1	ENSG00000162618	48.9324	28.992	-19.9404	-42.9186	-3.2989	0.0560172
chr1	247371423	247372096	674	-36104	ZNF124	ENSG00000196418	61.6232	81.595	19.9719	18.4703	4.05884	0.0532498	chr1	85038712	85039021	310	1125	CTBS	ENSG00000117151	78.4729	42.3362	-36.1367	-26.5874	-5.19803	0.0527592
chr1	249155846	249156336	491	-2561	ZNF692	ENSG00000171163	44.0154	65.5146	21.4992	13.4065	5.23307	0.0537702	chr1	85247753	85248109	357	83732	LPAR3	ENSG00000171517	79.596	61.1927	-18.4034	-25.6002	-3.01292	0.0590954
chr1	249166843	249166888	46	-13558	ZNF692	ENSG00000171163	25.5069	42.3432	16.8363	19.7762	3.33881	0.0542723	chr1	85360143	85360587	445	-1246	LPAR3	ENSG00000171517	82.3241	56.8766	-25.4475	-55.8347	-3.10318	0.0603032
chr2	691562	692120	559	-14122	TMEM18	ENSG00000151353	54.7143	74.4217	19.7074	73.0633	3.49529	0.0537484	chr1	85665444	85665966	523	762	SYDE2	ENSG00000097096	30.388	7.42341	-22.9646	-64.6762	-3.09108	0.0637813
chr2	708763	709367	605	-31323	TMEM18	ENSG00000151353	37.9189	61.3789	23.46	106.672	3.99492	0.0699059	chr1	87598200	87598406	207	139434	HS2ST1	ENSG00000153936	68.77	40.8255	-27.9445	-45.5249	-3.05755	0.0884084
chr2	1564444	1564617	174	56894	TPO	ENSG00000115705	65.3526	82.7396	17.387	15.2332	3.06821	0.05346	chr1	87792945	87793423	479	-727	LMO4	ENSG00000143013	56.5216	26.2675	-30.2541	-30.9299	-3.57412	0.0637258
chr2	1789478	1789610	133	-41199	PXDN	ENSG00000130508	59.2369	79.1096	19.8727	9.33376	3.14339	0.0573973	chr1	87801795	87802066	272	4443	LMO4	ENSG00000143013	37.4648	13.5037	-23.9612	-10.5024	-3.25849	0.0629314
chr2	2585241	2585965	725	-250274	MYT1L	ENSG00000186487	30.6352	54.2499	23.6147	99.0706	4.37446	0.0547044	chr1	87802498	87802649	152	5146	LMO4	ENSG00000143013	35.682	14.3531	-21.3289	-18.194	-3.00821	0.0629314
chr2	3434601	3435261	661	-12377	TRAPPC12	ENSG00000171853	53.3661	84.8273	31.4612	107.793	6.23934	0.0536159	chr1	89459527	89459658	132	-883	RBMXL1	ENSG00000213516	57.7137	40.3171	-17.3967	-12.5958	-3.01415	0.0523155
chr2	3435736	3436090	355	-11548	TRAPPC12	ENSG00000171853	64.0111	87.7227	23.7117	25.6312	5.06322	0.0536159	chr1	90287731	90287869	139	250	LRRC8D	ENSG00000171492	54.3722	38.0687	-16.3035	-16.4246	-3.10469	0.055786
chr2	3654428	3654761	334	785	COLEC11	ENSG00000118004	49.839	74.214	24.375	76.5834	4.34882	0.0546277	chr1	91488181	91488275	95	-351	ZNF644	ENSG00000122482	57.3271	34.7739	-22.5532	-15.3036	-3.26975	0.0529571
chr2	3683272	3684001	730	-21783	ALLC	ENSG00000151360	49.9318	78.6209	28.6891	99.3867	4.19869	0.0712767	chr1	91870704	91871003	300	-277	HFM1	ENSG00000162669	62.417	45.4693	-16.9477	-13.559	-3.10957	0.0646948
chr2	3714783	3715606	824	8997	ALLC	ENSG00000151360	16.1954	42.7205	26.5252	161.381	5.09635	0.0587399	chr1	92116630	92117712	1083	149934	CDC7	ENSG00000097046	81.2699	59.4934	-21.7765	-41.6031	-3.15906	0.0600426
chr2	3725954	3726620	667	20168	ALLC	ENSG00000151360	27.1566	56.0336	28.877	76.4439	4.35298	0.0622326	chr1	92496909	92497049	141	1369	EPHX4	ENSG00000172031	67.5693	51.8563	-15.7129	-12.4412	-3.08699	0.0579949
chr2	8722023	8722671	649	-96303	ID2	ENSG00000115738	63.581	84.5411	20.9601	32.5611	3.46822	0.0567153	chr1	93251402	93251697	296	6253	EVI5	ENSG00000067208	66.7994	41.3392	-25.4602	-62.2134	-3.07979	0.0576653
chr2	8799686	8799988	303	-18986	ID2	ENSG00000115738	51.5382	74.497	22.9588	15.8684	3.26174	0.0554943	chr1	93425559	93425611	53	1445	FAM69A	ENSG00000154511	77.7309	60.4157	-17.3152	-22.2016	-3.08017	0.0571205
chr2	9373977	9374345	369	27082	ASAP2	ENSG00000151693	57.2712	72.5444	15.2732	29.1075	3.30069	0.0607843	chr1	94510545	94510655	111	-26316	ABCA4	ENSG00000198691	65.731	48.3811	-17.3499	-15.1326	-3.00198	0.0531909
chr2	9861410	9861583	174	-90266	YWHAQ	ENSG00000134308	40.6099	61.6209	21.011	18.1034	3.0424	0.0697645	chr1	94581983	94582292	310	4388	ABCA4	ENSG00000198691	72.3389	57.4503	-14.8886	-38.4061	-3.09117	0.0540424
chr2	10114493	10114688	196	-20745	GRHL1	ENSG00000134317	47.2136	62.7113	15.4978	12.3118	3.09318	0.0540051	chr1	94800452	94801143	692	-82789	ABCD3	ENSG00000117528	61.5213	40.6743	-20.847	-27.1361	-3.2322	0.053774
chr2	10200401	10200882	482	16028	KLF11	ENSG00000172059	47.2999	67.1025	19.8026	60.0675	3.86691	0.0541403	chr1	94885184	94885396	213	1148	ABCD3	ENSG00000117528	51.8058	26.4974	-25.3084	-11.5587	-3.00475	0.0586835
chr2	10336614	10337025	412	55104	C2orf48	ENSG00000163009	63.1169	86.2875	23.1706	48.7727	3.62471	0.0613695	chr1	95368560	95369272	713	22064	CNN3	ENSG00000117519	82.1505	58.7473	-23.4032	-29.1013	-3.00671	0.0567574
chr2	10677030	10677224	195	-88399	ODC1	ENSG00000115758	53.755	68.4229	14.6679	28.6218	3.23741	0.0536662	chr1	95372472	95373284	813	18052	CNN3	ENSG00000117519	77.6842	54.7483	-22.9359	-36.4965	-3.00026	0.0529439
chr2	11053971	11054664	694	1907	KCNF1	ENSG00000162975	35.6797	80.3486	44.669	144.665	7.18138	0.067219	chr1	95488899	95489084	186	49416	ALG14	ENSG00000172339	62.4162	41.1806	-21.2356	-16.9861	-3.27416	0.0529709
chr2	11072416	11072857	442	20352	KCNF1	ENSG00000162975	37.6935	55.2703	17.5768	45.4606	3.37285	0.0590471	chr1	95489510	95489828	319	48672	ALG14	ENSG00000172339	82.2632	61.4781	-20.7851	-33.348	-3.1989	0.0529709
chr2	11120068	11120459	392	68004	KCNF1	ENSG00000162975	52.6151	74.2226	21.6075	25.1472	3.25586	0.0566552	chr1	97189123	97189423	301	849	PTBP2	ENSG00000117569	52.5405	32.2193	-20.3212	-14.1823	-3.31152	0.0545448
chr2	11268127	11268585	459	-4593	C2orf50	ENSG00000150873	37.0026	58.7608	21.7582	46.4381	4.08415	0.0595762	chr1	98383350	98383686	337	2866	DPYD	ENSG00000188641	68.9989	49.4902	-19.5088	-13.686	-3.19507	0.053142
chr2	20307129	20307917	789	-55339	LAPTM4A	ENSG00000068697	41.8865	69.608	27.7215	64.6673	4.85516	0.0719356	chr1	98520168	98520635	468	-133562	DPYD	ENSG00000188641	73.2382	50.3398	-22.8985	-29.0665	-3.16208	0.0554958
chr2	20836640	20836997	358	1277	HS1BP3	ENSG00000118960	40.9189	60.6187	19.6998	25.3938	3.2632	0.059042	chr1	109203342	109203406	65	270	HENMT1	ENSG00000162639	67.1289	50.7088	-16.4201	-15.8081	-3.07193	0.0565252
chr2	20864961	20865330	370	-1093	GDF7	ENSG00000143869	26.3986	59.2769	32.8782	66.9433	3.27469	0.0911927	chr1	109288864	109288975	112	-334	STXBP3	ENSG00000116266	33.1519	5.65176	-27.5001	-13.3811	-3.10892	0.0582722
chr2	23676828	23677850	1023	68739	KLHL29	ENSG00000119771	44.8214	71.8273	27.0059	76.1195	4.37056	0.0646091	chr1	109791666	109791741	76	-899	CELSR2	ENSG00000143126	41.6171	24.8826	-16.7345	-16.332	-3.20414	0.0550085
chr2	23887047	23887437	391	21784	KLHL29	ENSG00000119771	24.2645	45.5088	21.2443	16.7941	3.68691	0.0635435	chr1	110672230	110672407	178	17167	UBL4B	ENSG00000186150	58.7463	42.9258	-15.8206	-16.3787	-3.15117	0.0550714
chr2	26527948	26528680	733	-2734	EPT1	ENSG00000138018	51.6944	75.9073	24.2129	58.7715	4.22414	0.054681	chr1	111218079	111218427	349	-423	KCNA3	ENSG00000177272	44.5747	30.8249	-13.7498	-72.7377	-3.13472	0.0546993
chr2	26832558	26833801	1244	30434	CIB4	ENSG00000157884	45.085	67.1598	22.0749	75.3165	3.89359	0.0535573	chr1	111746249	111746319	71	711	DENND2D	ENSG00000162777	63.7087	44.7278	-18.9809	-12.4441	-3.02019	0.0555984
chr2	27265066	27265840	775	0	AGBL5	ENSG00000084693	41.8028	60.0783	18.2756	45.7188	3.406	0.0550762	chr1	114437750	114438423	674	-7580	BCL2L15	ENSG00000188761	83.5887	58.7598	-24.829	-30.6379	-3.03204	0.0604124
chr2	28491582	28491759	178	-123909	FOSL2	ENSG00000075426	47.4968	67.1767	19.6799	15.2115	3.04905	0.0558702	chr1	115051834	115052034	201	1746	TRIM33	ENSG00000197323	72.1845	46.4711	-25.7134	-28.9395	-3.43731	0.0566476
chr2	28589530	28589650	121	-26018	FOSL2	ENSG00000075426	62.8127	79.6828	16.8701	15.4026	3.13497	0.0579759	chr1	116917110	116917879	770	620	ATP1A1	ENSG00000163399	47.6117	13.7201	-33.8916	-96.5834	-3.16129	0.0705629
chr2	31806520	31806767	248	-168938	XDH	ENSG00000158125	25.1018	51.6556	26.5539	66.3181	3.80497	0.0678591	chr1	118491681	118491969	289	19289	WDR3	ENSG00000065183	87.7788	69.154	-18.6247	-12.3074	-3.0122	0.0521287
chr2	33099521	33100472	952	-71566	LTBP1	ENSG00000049323	34.0601	60.7403	26.6802	55.3225	3.55998	0.074604	chr1	119552120	119552347	228	-19940	TBX15	ENSG00000092607	34.3086	15.3957	-18.9129	-12.8366	-3.12833	0.0549414
chr2	33173370	33173471	102	1000	LTBP1	ENSG00000049323	44.4921	71.3475	26.8554	12.3805	4.4203	0.0615113	chr1	119682097	119682377	281	569	WARS2	ENSG00000116874	55.4008	35.0781	-20.3227	-18.7284	-3.09736	0.0543593
chr2	33361185	33361412	228	1460	LTBP1	ENSG00000049323	9.74304	39.6335	29.8904	14.1154	3.68469	0.0612065	chr1	120153958	120154417	460	35978	ZNF697	ENSG00000143067	52.8644	36.4378	-16.4266	-57.1375	-3.06518	0.0555654
chr2	38852043	38852819	777	-21864	HNRNPLL	ENSG00000143889	55.9256	76.9165	20.9909	47.3592	3.92169	0.0543392	chr1	120191574	120191728	155	-1177	ZNF697	ENSG00000143067	56.2065	36.705	-19.5015	-14.1325	-3.28568	0.0559967
chr2	39527876	39528149	274	24924	MAP4K3	ENSG00000011566	61.3373	82.5519	21.2146	13.9836	3.55014	0.0565237	chr1	143665196	143665273	78	102607	PPIAL4G	ENSG00000236334	69.6018	52.5411	-17.0608	-9.38909	-3.09499	0.0708582
chr2	43385484	43386565	1082	67182	ZFP36L2	ENSG00000152518	35.464	61.9827	26.5187	100.189	5.16488	0.0570834	chr1	143742943	143743045	103	24835	PPIAL4G	ENSG00000236334	27.1224	5.17958	-21.9429	-16.2962	-3.01488	0.0743732
chr2	43524945	43525223	279	-71196	ZFP36L2	ENSG00000152518	43.6521	73.1751	29.523	40.2834	4.90199	0.0591808	chr1	144519227	144519410	184	-154980	PPIAL4B	ENSG00000255854	37.5424	16.8911	-20.6514	-18.9768	-4.65188	0.061337
chr2	45239247	45239320	74	-2677	SIX2	ENSG00000170577	61.6667	80.0094	18.3427	9.13095	3.05395	0.0708637	chr1	145394679	145395243	565	-17851	HFE2	ENSG00000168509	46.615	25.6559	-20.9592	-75.3453	-3.06212	0.055475
chr2	47096343	47096712	370	39498	MCFD2	ENSG00000180398	50.6743	69.7648	19.0904	23.7959	3.47426	0.0534793	chr1	145612855	145612886	32	1818	RNF115	ENSG00000121848	67.3698	49.5914	-17.7784	-9.37089	-3.06705	0.0556525
chr2	54902401	54902937	537	-48741	EML6	ENSG00000214595	45.9374	67.0361	21.0987	45.807	3.82392	0.0632621	chr1	145713013	145713158	146	2406	CD160	ENSG00000117281	55.1251	34.4809	-20.6441	-11.5259	-3.28463	0.0525138
chr2	55365314	55365900	587	-25556	RTN4	ENSG00000115310	55.3869	73.6738	18.2869	32.1181	3.39059	0.0554593	chr1	147430786	147430820	35	30236	GPR89B	ENSG00000188092	97.2462	65.6191	-31.6271	-9.63843	-3.2069	0.0656006
chr2	56006966	56007116	151	-85920	PNPT1	ENSG00000138035	45.2786	59.3931	14.1146	15.8481	3.17328	0.0553908	chr1	148760512	148760590	79	21068	NBPF16	ENSG00000203827	48.5361	24.2719	-24.2642	-25.5017	-3.18543	0.0651347
chr2	65730778	65731580	803	-71006	SPRED2	ENSG00000198369	34.183	63.3056	29.1226	49.9812	4.39053	0.056893	chr1	149185328	149185484	157	215057	HIST2H3PS2	ENSG00000203818	59.4767	45.05	-14.4266	-9.40519	-3.03826	0.0522882
chr2	65731919	65732079	161	-72147	SPRED2	ENSG00000198369	27.8176	50.9899	23.1723	18.8024	3.3702	0.056893	chr1	150239861	150240165	305	-434	C1orf54	ENSG00000118292	77.9186	58.5366	-19.382	-20.3059	-3.04747	0.052199
chr2	65830066	65830501	436	-170294	SPRED2	ENSG00000198369	58.8213	81.0563	22.235	20.6137	3.66131	0.0570203	chr1	150335400	150335453	54	-1672	RPRD2	ENSG00000163125	73.0026	54.2312	-18.7715	-9.2449	-3.0074	0.0577526
chr2	67549267	67549363	97	-75087	ETAA1	ENSG00000143971	28.2819	54.7178	26.4359	9.17476	3.09686	0.0608263	chr1	150849652	150849805	154	-407	ARNT	ENSG00000143437	62.4703	34.9805	-27.4898	-38.7857	-3.56426	0.0622021
chr2	67549726	67550034	309	-74416	ETAA1	ENSG00000143971	32.3812	60.6779	28.2967	10.1905	3.44324	0.0608263	chr1	153540495	153540971	477	-128	S100A2	ENSG00000196754	62.0091	41.1721	-20.837	-73.0295	-3.06388	0.0580353
chr2	67550335	67550673	339	-73777	ETAA1	ENSG00000143971	39.4534	67.6609	28.2075	10.2529	3.47707	0.0608263	chr1	154774271	154774827	557	57491	KCNN3	ENSG00000143603	67.1988	46.0471	-21.1516	-36.3565	-3.10232	0.0521287
chr2	67788248	67788885	638	163796	ETAA1	ENSG00000143971	30.1121	49.0516	18.9395	33.932	3.10331	0.0539157	chr1	154785950	154785986	37	46332	KCNN3	ENSG00000143603	64.4527	40.4773	-23.9754	-12.1624	-3.02387	0.0677192
chr2	68267006	68267238	233	22875	C1D	ENSG00000197223	55.3593	72.9523	17.593	9.55273	3.24481	0.0569775	chr1	155111983	155112117	135	765	DPM3	ENSG00000179085	75.8726	53.3531	-22.5195	-36.8449	-3.41985	0.0540821
chr2	69477763	69478264	502	136115	GFPT1	ENSG00000198380	49.7362	72.3014	22.5651	13.6001	3.53959	0.0554959	chr1	155113439	155113566	128	-367	DPM3	ENSG00000179085	66.4203	48.5929	-17.8274	-29.5126	-3.14722	0.0545366
chr2	69478689	69478820	132	135559	GFPT1	ENSG00000198380	32.6627	54.0645	21.4018	9.68891	3.3056	0.0554055	chr1	155221254	155221343	90	3355	FAM189B	ENSG00000160767	75.8033	58.3806	-17.4228	-15.0991	-3.00324	0.0564099
chr2	69969925	69970167	243	688	ANXA4	ENSG00000196975	22.8067	44.801	21.9942	14.8154	4.2675	0.0565444	chr1	156046205	156047039	835	4749	MEX3A	ENSG00000254726	62.7655	28.8753	-33.8902	-342.832	-3.12603	0.0670884
chr2	72775389	72775776	388	277393	EXOC6B	ENSG00000144036	56.684	76.852	20.1681	16.5962	3.40292	0.0535006	chr1	156697041	156697368	328	858	ISG20L2	ENSG00000143319	72.9741	47.099	-25.8751	-30.5632	-3.64755	0.0546984
chr2	73270568	73270982	415	27819	SFXN5	ENSG00000144040	56.9736	77.9483	20.9747	20.4411	3.51441	0.0550068	chr1	156784832	156785288	457	-159	NTRK1	ENSG00000198400	67.0893	46.9218	-20.1675	-19.614	-3.038	0.0546983
chr2	73296551	73297196	646	1605	SFXN5	ENSG00000144040	39.5857	68.1922	28.6065	36.3311	5.38776	0.0592689	chr1	156889826	156889964	139	-477	LRRC71	ENSG00000160838	48.6351	35.216	-13.4191	-14.8653	-3.35143	0.0532783
chr2	74415332	74416030	699	-2486	CATX-2	ENSG00000267958	44.1418	66.8039	22.6622	29.4798	3.82399	0.0541273	chr1	157965828	157966159	332	2392	KIRREL	ENSG00000183853	60.6445	32.8087	-27.8358	-34.2128	-3.19081	0.0704632
chr2	74425085	74425331	247	-357	MTHFD2	ENSG00000065911	55.54	80.152	24.612	33.5018	4.51799	0.0587753	chr1	158083815	158083894	80	27344	KIRREL	ENSG00000183853	59.8213	43.7715	-16.0498	-9.894	-3.08797	0.0523029
chr2	75088775	75089818	1044	26477	HK2	ENSG00000159399	46.3507	72.2445	25.8938	61.8753	3.6602	0.062473	chr1	160067587	160067722	136	756	IGSF8	ENSG00000162729	54.1519	35.7416	-18.4103	-11.7983	-3.29241	0.0530903
chr2	75095420	75096088	669	33122	HK2	ENSG00000159399	36.7967	61.8592	25.0624	36.2028	3.5225	0.0605261	chr1	161135079	161135335	257	-864	PPOX	ENSG00000143224	61.157	36.3653	-24.7917	-33.5793	-3.50658	0.0521287
chr2	85276287	85277410	1124	76962	KCMF1	ENSG00000176407	55.7463	81.8982	26.1519	69.1638	4.26866	0.0611197	chr1	161442677	161443117	441	-32102	FCGR2A	ENSG00000143226	86.4093	70.0023	-16.4069	-41.3225	-3.0115	0.0534647
chr2	86079931	86080199	269	14577	ST3GAL5	ENSG00000115525	55.361	75.5748	20.2138	34.0453	3.12274	0.0534996	chr1	161501674	161502015	342	7637	HSPA6	ENSG00000173110	59.5515	38.7487	-20.8028	-64.5751	-3.21467	0.0587964
chr2	86745766	86746565	800	43931	CHMP3	ENSG00000115561	65.662	84.8321	19.1701	29.7988	3.43191	0.053877	chr1	161734690	161734966	277	-1117	ATF6	ENSG00000118217	57.949	36.3055	-21.6435	-79.3962	-3.00593	0.0521287
chr2	87776912	87778175	1264	-269430	PLGLB2	ENSG00000125551	52.9323	73.9782	21.0459	77.0996	4.33682	0.0546869	chr1	161992620	161993058	439	371	OLFML2B	ENSG00000162745	82.6187	59.011	-23.6077	-37.9753	-3.12194	0.0606951
chr2	87842191	87842377	187	-205228	PLGLB2	ENSG00000125551	43.7963	68.5905	24.7942	23.4736	3.92562	0.0556499	chr1	162467170	162467268	99	128	UHMK1	ENSG00000152332	63.0915	46.3742	-16.7174	-16.9294	-3.28715	0.0529945
chr2	88355771	88355831	61	-522	KRCC1	ENSG00000172086	44.3412	58.304	13.9627	12.4413	3.16667	0.05346	chr1	162583754	162584226	473	-16936	DDR2	ENSG00000162733	60.0379	44.0647	-15.9733	-54.5167	-3.02063	0.0524632
chr2	95774992	95775793	802	11951	MRPS5	ENSG00000144029	65.0108	87.0924	22.0816	37.2824	3.88048	0.0546973	chr1	163844169	163845558	1390	552424	NUF2	ENSG00000143228	50.7216	33.1762	-17.5454	-90.4691	-3.95176	0.0574002
chr2	97075716	97075874	159	45497	NCAPH	ENSG00000121152	21.507	39.7626	18.2556	24.3015	3.06078	0.0546522	chr1	163845952	163846081	130	554207	NUF2	ENSG00000143228	60.7853	44.6266	-16.1586	-15.6453	-3.83413	0.0607508
chr2	97194192	97194432	241	-8053	ARID5A	ENSG00000196843	39.6627	64.699	25.0363	35.3333	4.20104	0.0592469	chr1	164544935	164545136	202	12892	PBX1	ENSG00000185630	51.4253	19.0062	-32.4192	-15.667	-3.01648	0.0686923
chr2	100663645	100664110	466	56881	AFF3	ENSG00000144218	45.6075	67.4595	21.852	32.554	4.14394	0.0615106	chr1	164548190	164548560	371	16147	PBX1	ENSG00000185630	66.145	41.4239	-24.7211	-16.6789	-3.11804	0.0533906
chr2	100664419	100664859	441	56132	AFF3	ENSG00000144218	40.882	65.2786	24.3966	24.201	4.25575	0.0609207	chr1	164739657	164740692	1036	-1456	PBX1	ENSG00000185630	58.6415	32.4915	-26.15	-44.3173	-3.2518	0.0543988
chr2	100801073	100801240	168	-42027	AFF3	ENSG00000144218	40.9615	58.5745	17.613	9.52582	3.25746	0.0539234	chr1	165666855	165667063	209	481	ALDH9A1	ENSG00000143149	51.2021	35.0151	-16.187	-20.6185	-3.16138	0.0554597
chr2	101696604	101697798	1195	69916	TBC1D8	ENSG00000204634	44.3131	78.5984	34.2853	103.975	7.02331	0.0570975	chr1	167630478	167630931	454	30840	RCSD1	ENSG00000198771	59.7996	40.4378	-19.3618	-20.7962	-3.37133	0.0657731
chr2	102649330	102649931	602	24352	IL1R2	ENSG00000115590	29.1646	58.4961	29.3314	54.9415	6.17951	0.0577986	chr1	167874526	167874865	340	8461	ADCY10	ENSG00000143199	53.4371	35.8365	-17.6006	-12.5756	-3.09536	0.0521371
chr2	106682828	106682900	73	571	C2orf40	ENSG00000119147	35.5952	59.7868	24.1915	19.1872	3.28863	0.0588623	chr1	168049995	168050397	403	23769	GPR161	ENSG00000143147	72.6213	55.2346	-17.3867	-60.3706	-3.13655	0.0522893
chr2	109441608	109442032	425	-31351	CCDC138	ENSG00000163006	60.0856	82.3645	22.2788	18.5251	3.89871	0.05346	chr1	168050785	168050936	152	23230	GPR161	ENSG00000143147	56.0977	38.7241	-17.3736	-10.6561	-3.4574	0.0522893
chr2	109442355	109442495	141	-30888	CCDC138	ENSG00000163006	62.4696	84.8596	22.39	11.1476	3.79431	0.05346	chr1	168083703	168084312	610	-9535	GPR161	ENSG00000143147	75.4824	53.084	-22.3984	-46.7905	-3.9857	0.0521287
chr2	109447028	109447915	888	-25468	CCDC138	ENSG00000163006	57.788	79.8024	22.0145	47.8117	3.98869	0.05346	chr1	168196862	168197110	249	1606	SFT2D2	ENSG00000213064	42.7126	21.003	-21.7096	-15.2354	-3.01193	0.0606836
chr2	109561565	109561835	271	43889	EDAR	ENSG00000135960	31.7656	49.5801	17.8145	18.5532	3.19134	0.0539843	chr1	170499521	170499954	434	-1315	GORAB	ENSG00000120370	67.8549	48.5594	-19.2954	-20.1201	-3.05117	0.0586473
chr2	110083648	110084315	668	-174764	SH3RF3	ENSG00000172985	33.2314	60.1018	26.8704	57.1945	4.5339	0.0644344	chr1	170636194	170636450	257	3115	PRRX1	ENSG00000116132	60.3648	21.9606	-38.4042	-49.4782	-3.02276	0.0846585
chr2	110098775	110100047	1273	-159032	SH3RF3	ENSG00000172985	32.8613	63.0542	30.1929	129.915	5.71375	0.0632876	chr1	171192117	171192816	700	-24821	FMO1	ENSG00000010932	52.5345	37.3733	-15.1612	-26.0799	-3.1911	0.0542315
chr2	111942823	111943326	504	61493	BCL2L11	ENSG00000153094	45.8957	70.0353	24.1396	49.8764	4.62844	0.0536383	chr1	171809949	171810057	109	-563	DNM3	ENSG00000197959	62.377	44.9439	-17.433	-17.086	-3.20527	0.0562152
chr2	112078002	112078301	300	196672	BCL2L11	ENSG00000153094	55.0086	72.0322	17.0236	12.2345	3.08103	0.05346	chr1	174990173	174990404	232	2156	MRPS14	ENSG00000120333	84.2668	57.7019	-26.5649	-13.4002	-3.5683	0.0536261
chr2	114385607	114385935	329	642	RABL2A	ENSG00000144134	43.7008	59.4879	15.7871	14.5391	4.2201	0.0539975	chr1	179059841	179060719	879	5333	TOR3A	ENSG00000186283	72.8547	51.0772	-21.7775	-50.709	-3.02701	0.0562212
chr2	120107630	120109729	2100	14528	C2orf76	ENSG00000186132	50.9843	76.3659	25.3816	102.082	5.16841	0.0556601	chr1	179135826	179136668	843	-23601	ABL2	ENSG00000143322	72.8036	52.066	-20.7376	-31.6182	-3.14136	0.0521287
chr2	120655439	120656119	681	-31232	PTPN4	ENSG00000088179	55.7716	76.6377	20.8661	21.9075	3.76648	0.0550554	chr1	179713788	179714312	525	1489	FAM163A	ENSG00000143340	50.914	19.1517	-31.7623	-106.015	-3.14484	0.0658631
chr2	121279906	121280470	565	-56208	LINC01101	ENSG00000268194	31.0667	53.3781	22.3113	79.7911	3.70419	0.0545287	chr1	179786730	179788091	1362	46219	IFRG15	ENSG00000258664	70.3513	39.3553	-30.996	-176.314	-3.46798	0.0577979
chr2	121508911	121509223	313	15087	GLI2	ENSG00000074047	54.5434	72.2566	17.7132	16.8343	3.56167	0.057452	chr1	180077089	180077692	604	14239	CEP350	ENSG00000135837	85.7713	65.3135	-20.4579	-24.1665	-3.27066	0.054444
chr2	121511601	121512673	1073	17777	GLI2	ENSG00000074047	36.554	65.8754	29.3214	97.8693	6.31861	0.0634824	chr1	182584761	182584993	233	-11217	RGS16	ENSG00000143333	31.6244	15.5357	-16.0888	-23.876	-3.04021	0.0548284
chr2	121616074	121616587	514	61152	GLI2	ENSG00000074047	63.4114	79.3079	15.8965	28.3686	3.29627	0.0569173	chr1	182809947	182810253	307	1442	DHX9	ENSG00000135829	71.6304	51.3889	-20.2415	-52.4308	-3.14735	0.0532594
chr2	121670106	121670634	529	115184	GLI2	ENSG00000074047	32.6393	57.5476	24.9083	104.46	4.60431	0.0610716	chr1	182923215	182923750	536	-709	SHCBP1L	ENSG00000157060	72.4906	50.6105	-21.8801	-48.4463	-3.08265	0.0641395
chr2	122039760	122039964	205	2818	TFCP2L1	ENSG00000115112	52.4029	71.8061	19.4032	16.5137	3.66549	0.0616158	chr1	182990996	182991254	259	-1340	LAMC1	ENSG00000135862	62.9496	38.2258	-24.7239	-22.5808	-3.22534	0.0548605
chr2	122040293	122040790	498	1992	TFCP2L1	ENSG00000115112	48.9405	73.1643	24.2238	53.315	4.38698	0.0614436	chr1	183680913	183681035	123	-58464	APOBEC4	ENSG00000173627	63.1559	43.5946	-19.5613	-14.102	-3.44055	0.0521287
chr2	127842523	127842874	352	21702	BIN1	ENSG00000136717	30.4368	54.3488	23.912	27.1036	3.61732	0.0616148	chr1	183681425	183681647	223	-58976	APOBEC4	ENSG00000173627	70.0943	50.5217	-19.5727	-14.0923	-3.33023	0.0521287
chr2	127963010	127963653	644	0	CYP27C1	ENSG00000186684	61.1149	81.5892	20.4743	104.366	3.80019	0.0622117	chr1	183776418	183776726	309	2127	RGL1	ENSG00000143344	75.2866	57.5295	-17.7571	-18.9203	-3.04502	0.054676
chr2	128988755	128989156	402	51394	UGGT1	ENSG00000136731	54.8704	79.5695	24.6991	21.1154	4.81602	0.054003	chr1	184121646	184121919	274	100765	TSEN15	ENSG00000198860	61.7781	42.3734	-19.4047	-12.1381	-3.01076	0.0552451
chr2	129135635	129136056	422	-59483	HS6ST1	ENSG00000136720	44.0676	67.4897	23.4221	37.3901	3.98038	0.0545637	chr1	185051857	185052794	938	36628	RNF2	ENSG00000121481	84.5597	62.9112	-21.6485	-49.2213	-3.08266	0.0527812
chr2	132432769	132433007	239	-46940	C2orf27A	ENSG00000197927	33.346	54.4531	21.107	15.1347	3.93573	0.0570827	chr1	186342449	186342930	482	1526	TPR	ENSG00000047410	69.556	43.909	-25.647	-27.1102	-3.85968	0.0538785
chr2	133404074	133404494	421	23283	LYPD1	ENSG00000150551	44.619	67.9021	23.2831	29.6879	3.45222	0.0554136	chr1	189028161	189028458	298	1415472	BRINP3	ENSG00000162670	65.835	49.9341	-15.9009	-50.2045	-3.11541	0.055017
chr2	148777109	148777219	111	1072	ORC4	ENSG00000115947	48.726	64.7189	15.9928	22.1185	3.28063	0.057399	chr1	197169213	197169288	76	383	ZBTB41	ENSG00000177888	79.6045	48.1063	-31.4982	-21.074	-4.43879	0.0547215
chr2	150508930	150509086	157	-64599	MMADHC	ENSG00000168288	53.6231	71.1533	17.5302	16.2919	3.27929	0.0541035	chr1	200634589	200635078	490	-1496	DDX59	ENSG00000118197	74.185	50.4401	-23.7449	-24.5922	-3.01945	0.0558406
chr2	153322226	153322320	95	130474	FMNL2	ENSG00000157827	46.2652	64.4047	18.1395	10.255	3.43881	0.0602689	chr1	200635470	200635745	276	-2377	DDX59	ENSG00000118197	73.1026	49.0256	-24.077	-33.0358	-3.29944	0.0562389
chr2	153322724	153322823	100	130972	FMNL2	ENSG00000157827	37.0069	54.4787	17.4718	20.0414	3.35778	0.0600211	chr1	200861192	200861906	715	722	C1orf106	ENSG00000163362	63.8846	40.3604	-23.5243	-57.1875	-3.24597	0.0589523
chr2	158454318	158454401	84	-245	ACVR1C	ENSG00000123612	22.4755	46.4542	23.9787	19.9827	4.84755	0.0554813	chr1	201436697	201436902	206	1409	PHLDA3	ENSG00000174307	52.172	27.5868	-24.5852	-14.6047	-3.05576	0.0612176
chr2	160052233	160052553	321	90509	WDSUB1	ENSG00000196151	60.4293	78.1879	17.7587	15.2987	3.09182	0.0542685	chr1	201609890	201610413	524	-6963	NAV1	ENSG00000134369	59.1189	33.1923	-25.9267	-37.7505	-3.10251	0.0620752
chr2	160760282	160760520	239	672	LY75	ENSG00000054219	44.2451	64.5981	20.3531	22.8162	3.36938	0.0600186	chr1	202114745	202114946	202	-875	ARL8A	ENSG00000143862	61.5624	36.4268	-25.1356	-16.815	-3.03403	0.0559555
chr2	160920874	160921294	421	-1752	PLA2R1	ENSG00000153246	60.4592	84.6939	24.2347	15.1541	4.00084	0.0605418	chr1	202937612	202937858	247	-1203	CYB5R1	ENSG00000159348	75.8957	53.5247	-22.3711	-11.2678	-3.22325	0.0618032
chr2	168862701	168863431	731	137242	B3GALT1	ENSG00000172318	69.688	90.1996	20.5116	48.7547	4.09825	0.0538096	chr1	203016178	203016613	436	1583	PPFIA4	ENSG00000143847	36.522	17.0383	-19.4837	-49.1868	-3.04045	0.0723561
chr2	171567683	171568374	692	2702	LINC01124	ENSG00000222033	22.175	47.0614	24.8863	64.6389	4.59354	0.060711	chr1	203619381	203619607	227	23452	ATP2B4	ENSG00000058668	45.6673	19.5115	-26.1557	-24.8251	-3.02688	0.0755006
chr2	174280972	174281209	238	61371	CDCA7	ENSG00000144354	31.2017	55.2685	24.0668	48.5898	3.5701	0.0637072	chr1	203636532	203637304	773	-14632	ATP2B4	ENSG00000058668	72.4596	48.165	-24.2946	-43.7412	-3.23604	0.0598026
chr2	174927902	174928369	468	-97471	SP3	ENSG00000172845	54.0235	72.2229	18.1995	41.8538	3.31593	0.0546945	chr1	204320515	204320648	134	8395	PLEKHA6	ENSG00000143850	60.1052	38.5226	-21.5827	-12.7103	-3.00142	0.0540254
chr2	175349721	175350114	394	1650	GPR155	ENSG00000163328	56.0705	77.6259	21.5554	32.7053	3.39383	0.057648	chr1	204639133	204639418	286	15062	LRRN2	ENSG00000170382	66.655	47.6107	-19.0443	-9.13549	-3.00862	0.0580868
chr2	175596347	175596493	147	32646	CHRNA1	ENSG00000138435	49.2953	70.946	21.6507	12.2508	3.10051	0.0618946	chr1	204797100	204797330	231	-451	NFASC	ENSG00000163531	60.6098	40.4594	-20.1504	-17.5561	-3.05576	0.055617
chr2	175692120	175692522	403	18610	CHN1	ENSG00000128656	38.727	63.0403	24.3134	33.2542	4.27369	0.0534708	chr1	205091840	205091989	150	-696	RBBP5	ENSG00000117222	55.5059	31.1705	-24.3354	-26.7524	-3.29495	0.0539951
chr2	175693038	175693676	639	17456	CHN1	ENSG00000128656	45.9064	69.2471	23.3407	34.6438	4.12034	0.0534934	chr1	205179218	205179434	217	1259	DSTYK	ENSG00000133059	74.4896	54.66	-19.8296	-39.6749	-3.1655	0.0522935
chr2	176868320	176869072	753	-752	KIAA1715	ENSG00000144320	31.6294	57.8995	26.2701	42.5609	4.20991	0.0633939	chr1	205283136	205283267	132	7615	NUAK2	ENSG00000163545	61.7707	39.6924	-22.0783	-15.0376	-3.00145	0.0652898
chr2	176961140	176961237	98	-3220	HOXD12	ENSG00000170178	4.40839	38.2471	33.8387	13.7135	3.64535	0.0727592	chr1	205673821	205674215	395	-8281	AC119673.1	ENSG00000268313	80.2071	51.4502	-28.7569	-10.5926	-3.33114	0.0693355
chr2	176997707	176998053	347	2621	HOXD8	ENSG00000175879	30.5078	56.6121	26.1043	28.5347	4.04391	0.0597138	chr1	205674523	205674580	58	-7916	AC119673.1	ENSG00000268313	80.5286	54.0985	-26.4301	-9.43116	-3.04265	0.0704179
chr2	176998551	176999105	555	-2579	HOXD3	ENSG00000128652	43.1677	72.0903	28.9226	26.9881	4.30319	0.0597138	chr1	206106472	206106684	213	-30552	FAM72A	ENSG00000196550	86.4849	65.9537	-20.5312	-12.2078	-3.90949	0.0523102
chr2	177002369	177003017	649	683	HOXD3	ENSG00000128652	30.1319	66.7884	36.6565	36.8341	3.78296	0.0724897	chr1	206762447	206762829	383	22973	EIF2D	ENSG00000143486	37.858	19.0211	-18.8369	-29.6834	-3.1175	0.0527803
chr2	177013318	177013856	539	-1265	HOXD3	ENSG00000128652	25.4381	61.0007	35.5626	43.9515	4.0942	0.0580843	chr1	206763393	206764697	1305	21105	EIF2D	ENSG00000143486	59.7455	35.7191	-24.0264	-54.6087	-3.10977	0.0527803
chr2	177501142	177501705	564	366911	MTX2	ENSG00000128654	53.0531	83.781	30.7279	14.5586	3.94724	0.0626028	chr1	207542798	207543158	361	47661	CD55	ENSG00000196352	76.5016	53.757	-22.7446	-13.1785	-3.18966	0.0534898
chr2	178935649	178936017	369	1464	PDE11A	ENSG00000128655	50.4224	71.716	21.2936	11.8824	4.53699	0.0613944	chr1	207819027	207819196	170	507	CR1L	ENSG00000197721	63.0451	46.4356	-16.6095	-24.1736	-3.08328	0.0521287
chr2	180724568	180724770	203	1461	ZNF385B	ENSG00000144331	36.3042	58.8007	22.4965	16.6525	4.26966	0.0602119	chr1	207992343	207992749	407	48658	CD46	ENSG00000117335	69.4466	35.8935	-33.5531	-64.2883	-3.0642	0.055077
chr2	180727258	180727533	276	-1025	ZNF385B	ENSG00000144331	36.4354	59.8718	23.4364	17.539	4.70943	0.0598828	chr1	207995752	207996549	798	52067	CD46	ENSG00000117335	69.095	30.3447	-38.7503	-45.8719	-3.57703	0.0605421
chr2	197037181	197037230	50	-881	STK17B	ENSG00000081320	28.7191	45.222	16.5029	10.382	3.51922	0.0563662	chr1	208136314	208136344	31	-51566	CD34	ENSG00000174059	66.5322	44.7528	-21.7794	-9.18699	-3.03818	0.0668395
chr2	197456467	197456534	68	800	HECW2	ENSG00000138411	54.9586	77.902	22.9435	10.3464	3.56546	0.0645004	chr1	209943265	209943488	224	1304	TRAF3IP3	ENSG00000009790	58.9729	41.5137	-17.4592	-16.2169	-3.06432	0.0576405
chr2	198076195	198077899	1705	-13432	ANKRD44	ENSG00000065413	57.42	76.3582	18.9382	63.3541	3.54115	0.0547712	chr1	210426022	210426559	538	19877	SERTAD4	ENSG00000082497	67.0011	34.2747	-32.7264	-160.035	-3.6103	0.0654749
chr2	202673710	202674741	1032	2321	CDK15	ENSG00000138395	42.1639	65.7381	23.5741	39.2584	4.43313	0.0616796	chr1	211555467	211555581	115	35760	TRAF5	ENSG00000082512	43.3027	24.5391	-18.7636	-10.0159	-3.22519	0.0546936
chr2	204362998	204363472	475	-2921	RAPH1	ENSG00000173166	33.9589	57.2806	23.3217	20.8299	3.54801	0.0640658	chr1	211650394	211650752	359	15506	RD3	ENSG00000198570	66.7307	45.3159	-21.4148	-22.8438	-3.15936	0.0554481
chr2	206635406	206635834	429	87390	NRP2	ENSG00000118257	49.3053	78.3271	29.0218	27.782	3.13122	0.0839825	chr1	211750357	211750490	134	1593	SLC30A1	ENSG00000170385	49.1474	19.3342	-29.8132	-15.8422	-4.13144	0.0523924
chr2	206767002	206768067	1066	159900	INO80D	ENSG00000114933	34.1867	64.2779	30.0912	65.2269	3.98834	0.0705368	chr1	212605702	212605837	136	-391	NENF	ENSG00000117691	47.4294	24.8733	-22.5562	-16.1537	-3.50467	0.0542752
chr2	208545791	208545944	154	-30319	CCNYL1	ENSG00000163249	59.752	81.9756	22.2236	22.7479	4.15129	0.0575109	chr1	213125745	213126134	390	859	VASH2	ENSG00000143494	40.5898	16.5828	-24.007	-36.6638	-3.53375	0.0660049
chr2	208995284	208995788	505	-729	CRYGC	ENSG00000163254	30.5271	48.1857	17.6587	29.2733	3.34752	0.0544835	chr1	214279731	214280018	288	109851	PROX1	ENSG00000117707	57.4125	44.3452	-13.0673	-21.9843	-3.02012	0.0571619
chr2	209121603	209121789	187	-1080	IDH1	ENSG00000138413	33.3563	53.3387	19.9824	15.5299	3.17882	0.0618078	chr1	214358661	214359286	626	-95289	SMYD2	ENSG00000143499	54.958	34.6139	-20.3441	-29.3175	-3.17142	0.0559486
chr2	216325849	216325987	139	-24953	FN1	ENSG00000115414	32.9076	51.9353	19.0277	13.2323	3.34848	0.0546162	chr1	214453588	214453646	59	-929	SMYD2	ENSG00000143499	67.2837	49.2096	-18.0742	-9.94583	-3.1744	0.0521287
chr2	216477492	216478568	1077	-176596	FN1	ENSG00000115414	46.162	74.3173	28.1554	74.5534	5.94494	0.0569832	chr1	214704938	214705174	237	19391	PTPN14	ENSG00000152104	71.2486	43.5998	-27.6488	-17.672	-3.96405	0.0549213
chr2	219693096	219693522	427	2991	PRKAG3	ENSG00000115592	47.7511	68.4405	20.6894	27.1484	3.55794	0.058449	chr1	218567795	218568271	477	48217	TGFB2	ENSG00000092969	79.5156	46.9702	-32.5454	-48.612	-3.43001	0.0720553
chr2	219749205	219749559	355	2321	WNT10A	ENSG00000135925	57.6924	78.9787	21.2863	16.3366	4.63141	0.0554836	chr1	218837930	218838237	308	154491	C1orf143	ENSG00000228208	70.2237	53.4666	-16.7571	-9.05865	-3.00559	0.0541421
chr2	220385317	220386129	813	6264	ASIC4	ENSG00000072182	32.7307	52.5065	19.7758	42.116	4.38781	0.05346	chr1	221437825	221438473	649	383240	HLX	ENSG00000136630	76.3588	59.8516	-16.5072	-41.614	-3.15245	0.0551288
chr2	227585536	227585893	358	78581	IRS1	ENSG00000169047	38.8038	60.3529	21.5491	22.4843	3.8032	0.0594003	chr1	222789850	222790463	614	-964	MIA3	ENSG00000154305	63.9651	39.7695	-24.1956	-29.5251	-3.32854	0.0575018
chr2	227619594	227620104	511	44370	IRS1	ENSG00000169047	21.4268	46.2079	24.7811	33.5456	4.4246	0.0564693	chr1	223317040	223317256	217	-415	TLR5	ENSG00000187554	67.2972	41.2609	-26.0363	-17.1887	-3.70135	0.0567335
chr2	227620637	227620997	361	43477	IRS1	ENSG00000169047	38.1357	60.039	21.9033	11.0208	4.21184	0.0564693	chr1	224075691	224075985	295	-42016	TP53BP2	ENSG00000143514	52.6006	32.6798	-19.9208	-42.131	-3.2598	0.05853
chr2	227665297	227665381	85	-821	IRS1	ENSG00000169047	5.2203	23.3687	18.1484	12.708	3.33014	0.0570665	chr1	224179732	224179768	37	36602	AC138393.1	ENSG00000269358	58.9083	38.123	-20.7853	-9.35217	-3.01447	0.0568161
chr2	232044866	232045255	390	-18004	ARMC9	ENSG00000135931	48.9367	69.2755	20.3388	22.2878	4.02646	0.0556021	chr1	224415231	224415466	236	44262	DEGS1	ENSG00000143753	82.1693	62.9203	-19.249	-34.3465	-3.31047	0.0531428
chr2	232471573	232471989	417	13997	C2orf57	ENSG00000177673	57.3418	76.6272	19.2854	28.7814	3.3889	0.05346	chr1	224545659	224546063	405	1063	CNIH4	ENSG00000143771	57.1115	35.5145	-21.597	-21.6135	-3.10891	0.0554245
chr2	232765338	232765904	567	25133	NPPC	ENSG00000163273	43.6507	63.9437	20.293	66.4137	3.59164	0.0578142	chr1	224727870	224728234	365	-75760	CNIH3	ENSG00000143786	81.3578	65.8539	-15.5039	-12.2721	-3.02251	0.0521287
chr2	233391038	233391345	308	139	CHRND	ENSG00000135902	38.5676	59.0743	20.5066	29.5969	3.43448	0.0615605	chr1	226068941	226069238	298	830	TMEM63A	ENSG00000196187	30.7164	13.9255	-16.7908	-29.9665	-3.00115	0.0559659
chr2	235158272	235158782	511	198840	SPP2	ENSG00000072080	50.8566	71.101	20.2444	28.2134	3.71546	0.0593364	chr1	226833607	226834115	509	91043	ITPKB	ENSG00000143772	70.6953	43.4265	-27.2689	-45.0508	-3.22862	0.0658447
chr2	235314765	235315412	648	89831	ARL4C	ENSG00000188042	48.3891	67.6474	19.2583	39.5047	3.43443	0.0563961	chr1	226889862	226890187	326	34971	ITPKB	ENSG00000143772	73.8264	49.2483	-24.5781	-41.5125	-3.00808	0.0611489
chr2	235811100	235811594	495	-49022	SH3BP4	ENSG00000130147	44.8553	61.0642	16.209	34.5444	3.86464	0.0580284	chr1	226924441	226924797	357	361	ITPKB	ENSG00000143772	60.396	32.6187	-27.7773	-101.326	-3.12469	0.0625913
chr2	235862291	235863616	1326	1570	SH3BP4	ENSG00000130147	16.3347	50.6414	34.3067	115.472	5.46261	0.0840082	chr1	227950855	227950962	108	15090	SNAP47	ENSG00000143740	69.2266	51.3893	-17.8373	-9.40275	-3.1059	0.0521844
chr2	235888385	235888706	322	1035	SH3BP4	ENSG00000130147	70.4102	88.4735	18.0633	9.81701	3.31896	0.0594968	chr1	227962356	227963543	1188	26591	SNAP47	ENSG00000143740	73.1989	26.5808	-46.6181	-416.408	-3.61907	0.052336
chr2	235909228	235910411	1184	5743	SH3BP4	ENSG00000130147	38.9513	71.943	32.9916	153.431	6.64865	0.071198	chr1	228100607	228100896	290	34702	WNT9A	ENSG00000143816	51.0994	36.9686	-14.1308	-43.9258	-3.01013	0.0549334
chr2	235971875	235972671	797	68390	SH3BP4	ENSG00000130147	43.0174	63.0192	20.0019	82.2697	3.96258	0.0550295	chr1	228361669	228361749	81	-501	IBA57	ENSG00000181873	59.9408	42.3657	-17.5751	-21.5916	-3.01872	0.0565074
chr2	236551943	236552023	81	-26224	AGAP1	ENSG00000157985	71.2413	88.4052	17.1639	13.3415	3.52691	0.05346	chr1	228603123	228603286	164	443	TRIM17	ENSG00000162931	70.6466	54.2847	-16.3619	-9.1019	-3.00633	0.0594345
chr2	236552342	236553382	1041	-24865	AGAP1	ENSG00000157985	53.0359	79.7295	26.6937	97.2337	5.72512	0.05346	chr1	229662811	229663748	938	-18707	NUP133	ENSG00000069248	87.6775	65.6584	-22.019	-41.0593	-3.30747	0.0521287
chr2	236585342	236586710	1369	7093	AGAP1	ENSG00000157985	45.1642	79.862	34.6978	139.342	5.93942	0.0694655	chr1	230238631	230239009	379	35612	GALNT2	ENSG00000143641	72.3675	51.1432	-21.2243	-19.1884	-3.15729	0.0596507
chr2	236623960	236624277	318	-29130	AGAP1	ENSG00000157985	54.2988	72.8425	18.5437	16.8849	3.68861	0.0537341	chr1	230245689	230245833	145	42670	GALNT2	ENSG00000143641	80.4601	57.657	-22.803	-23.871	-3.27639	0.0577175
chr2	236767991	236768586	596	-23452	AGAP1	ENSG00000157985	58.8568	79.2327	20.3758	48.3743	3.80465	0.05666	chr1	230246135	230246195	61	43116	GALNT2	ENSG00000143641	76.8857	54.335	-22.5507	-10.0628	-3.28163	0.0577175
chr2	236768944	236769123	180	-22915	AGAP1	ENSG00000157985	55.5226	74.634	19.1114	17.5263	3.54866	0.05666	chr1	230260830	230261240	411	57811	GALNT2	ENSG00000143641	72.9388	47.8148	-25.124	-21.4406	-3.01009	0.0659405
chr2	236981860	236983181	1322	27278	AGAP1	ENSG00000157985	41.813	66.4726	24.6597	66.4946	4.48952	0.0574973	chr1	230272718	230272777	60	69699	GALNT2	ENSG00000143641	83.6093	55.3427	-28.2666	-12.0911	-3.02019	0.0729646
chr2	238197759	238198334	576	32024	AC112715.2	ENSG00000224132	35.0734	55.0984	20.025	44.2674	3.27812	0.0674709	chr1	230358018	230358490	473	154876	PGBD5	ENSG00000177614	70.1943	46.1377	-24.0566	-21.9351	-3.00029	0.0606944
chr2	238581924	238581991	68	-18796	LRRFIP1	ENSG00000124831	59.1725	81.5017	22.3292	15.0863	3.0313	0.0685453	chr1	230957493	230957973	481	33808	C1orf198	ENSG00000119280	54.5688	39.8905	-14.6783	-21.4127	-3.0076	0.0557642
chr2	238637959	238639327	1369	36976	LRRFIP1	ENSG00000124831	74.8372	93.0543	18.2171	107.153	4.97232	0.0573039	chr1	231555362	231555808	447	4981	EGLN1	ENSG00000135766	41.255	17.6471	-23.6079	-18.1463	-3.32366	0.0562234
chr2	239071406	239071812	407	-1161	FAM132B	ENSG00000178752	64.8855	82.9526	18.0671	35.6465	3.46096	0.0538067	chr1	231558910	231558948	39	1841	EGLN1	ENSG00000135766	88.5295	65.9229	-22.6066	-11.7778	-3.70701	0.0549379
chr2	240035582	240036058	477	26610	HDAC4	ENSG00000068024	21.9629	45.9019	23.939	36.3083	3.46475	0.0688171	chr1	231778766	231779192	427	16204	DISC1	ENSG00000162946	69.1787	52.8625	-16.3162	-15.4823	-3.00905	0.0609552
chr2	240259872	240260378	507	-28964	HDAC4	ENSG00000068024	35.5279	59.0381	23.5102	43.4211	3.57964	0.0721232	chr1	233748807	233748912	106	-837	KCNK1	ENSG00000135750	36.8706	17.9722	-18.8983	-9.55726	-3.17909	0.0579239
chr2	241314444	241314478	35	-60609	GPC1	ENSG00000063660	58.3177	77.3345	19.0169	9.55755	3.26725	0.0559227	chr1	234718240	234718986	747	26284	IRF2BP2	ENSG00000168264	71.3297	49.2284	-22.1013	-32.5193	-3.02573	0.0651077
chr2	241897442	241897606	165	-1191	AC104809.3	ENSG00000226321	48.1589	73.8339	25.6749	30.6657	3.10849	0.063962	chr1	234861911	234862704	794	-116639	IRF2BP2	ENSG00000168264	81.5882	54.0048	-27.5833	-66.8444	-3.38229	0.0584578
chr2	241930655	241930869	215	-7385	SNED1	ENSG00000162804	46.6066	65.2996	18.693	13.1621	3.4838	0.0622016	chr1	234882249	234882916	668	-136977	IRF2BP2	ENSG00000168264	74.4806	50.2266	-24.2539	-47.8683	-3.27006	0.0609589
chr2	242613628	242613940	313	7616	ATG4B	ENSG00000168397	55.4306	72.8725	17.4418	30.4228	3.55421	0.055936	chr1	235035388	235036069	682	256181	TOMM20	ENSG00000173726	73.8116	44.752	-29.0597	-105.323	-3.2111	0.0736408
chr2	242698279	242699171	893	3789	D2HGDH	ENSG00000180902	49.5031	74.8079	25.3047	100.434	4.89647	0.058982	chr1	235062646	235063174	529	229076	TOMM20	ENSG00000173726	80.5995	59.9089	-20.6906	-49.1243	-3.00364	0.0521287
chr2	242834037	242834212	176	7076	AC131097.4	ENSG00000216921	40.656	61.2479	20.5919	16.2856	3.36163	0.0633661	chr1	235090910	235091608	699	200642	TOMM20	ENSG00000173726	67.4343	35.4499	-31.9844	-53.3059	-3.04315	0.0704936
chr3	4392718	4393432	715	47425	SETMAR	ENSG00000170364	28.1465	48.3684	20.2218	46.7617	3.78563	0.0560964	chr1	235097965	235098132	168	194118	TOMM20	ENSG00000173726	48.5325	16.7514	-31.781	-15.7288	-3.51503	0.0728352
chr3	4867340	4868477	1138	58994	AC018816.3	ENSG00000235978	38.2531	61.4795	23.2264	91.8193	3.87518	0.0577638	chr1	235098442	235099406	965	192844	TOMM20	ENSG00000173726	69.8894	28.4698	-41.4196	-122.25	-3.07595	0.0728352
chr3	5227732	5227937	206	-1420	EDEM1	ENSG00000134109	48.2761	68.8012	20.5251	9.91214	3.39511	0.0566064	chr1	235107109	235107360	252	184890	TOMM20	ENSG00000173726	42.021	22.1315	-19.8895	-17.2223	-3.19585	0.0573783
chr3	10246033	10246389	357	39483	IRAK2	ENSG00000134070	44.2554	65.4005	21.1451	32.8796	4.01195	0.0554732	chr1	235115601	235115890	290	176360	TOMM20	ENSG00000173726	66.2324	47.2193	-19.0131	-18.3692	-3.00885	0.0521287
chr3	10246952	10247569	618	40402	IRAK2	ENSG00000134070	33.6032	55.7189	22.1157	26.8903	4.24115	0.0554732	chr1	235256343	235256646	304	35604	TOMM20	ENSG00000173726	59.8561	28.7116	-31.1445	-72.1702	-3.18952	0.053503
chr3	10392928	10393190	263	-30065	SEC13	ENSG00000157020	54.5057	76.0467	21.541	18.387	3.0945	0.0578528	chr1	236164186	236165023	838	63385	NID1	ENSG00000116962	88.384	65.1311	-23.2529	-67.0076	-3.03562	0.0657052
chr3	10420739	10421846	1108	30512	ATP2B2	ENSG00000157087	45.3706	73.7583	28.3877	81.3583	3.75411	0.0591232	chr1	236183731	236185078	1348	43330	NID1	ENSG00000116962	73.8224	47.2351	-26.5873	-121.209	-3.10278	0.0521287
chr3	11518708	11519014	307	91383	VGLL4	ENSG00000144560	46.4086	67.0196	20.611	15.1162	3.03652	0.0604943	chr1	236198989	236199146	158	29262	NID1	ENSG00000116962	76.7676	50.4686	-26.299	-33.3086	-4.05356	0.0525565
chr3	11651087	11651926	840	51	VGLL4	ENSG00000144560	42.2764	71.8121	29.5357	101.499	4.08133	0.0806275	chr1	236229211	236229981	771	-748	NID1	ENSG00000116962	69.8106	43.2111	-26.5995	-54.1079	-3.08183	0.0626273
chr3	11677935	11678156	222	7241	VGLL4	ENSG00000144560	26.3381	46.6438	20.3057	9.22352	3.15044	0.0621488	chr1	240735365	240735788	424	39660	GREM2	ENSG00000180875	69.8119	50.1398	-19.6721	-17.3559	-3.16914	0.0528048
chr3	12559164	12559290	127	-12079	TSEN2	ENSG00000154743	37.3276	58.8162	21.4886	17.8211	3.58338	0.0567273	chr1	240736458	240736589	132	38859	GREM2	ENSG00000180875	69.6775	50.0597	-19.6178	-10.1426	-3.17609	0.0538998
chr3	13573252	13574788	1537	0	FBLN2	ENSG00000163520	39.2714	59.8645	20.5931	108.19	4.3733	0.0578739	chr1	242160684	242161279	596	1095	MAP1LC3C	ENSG00000197769	70.2644	58.27	-11.9945	-43.9754	-3.01299	0.0558605
chr3	13591306	13591547	242	624	FBLN2	ENSG00000163520	49.7761	75.3239	25.5477	22.0971	3.24503	0.0754198	chr1	243423679	243423938	260	4306	SDCCAG8	ENSG00000054282	74.1728	55.2737	-18.8991	-13.911	-3.10412	0.0549566
chr3	14246031	14247010	980	-25747	XPC	ENSG00000154767	37.2419	61.1881	23.9461	52.9216	4.49524	0.0563931	chr1	243639806	243639966	161	190120	SDCCAG8	ENSG00000054282	86.6412	64.4225	-22.2187	-10.0191	-3.31904	0.0633832
chr3	14446163	14447629	1467	2042	SLC6A6	ENSG00000131389	46.1575	76.9262	30.7687	102.099	6.79251	0.055525	chr1	243653140	243653490	351	203454	SDCCAG8	ENSG00000054282	84.7197	61.6313	-23.0884	-28.7812	-3.01367	0.0671071
chr3	17181783	17182781	999	129796	PLCL2	ENSG00000154822	29.6464	53.2497	23.6033	76.0539	4.13789	0.0549834	chr1	244512094	244513466	1373	-2470	C1orf100	ENSG00000173728	68.6096	39.47	-29.1396	-139.454	-3.07067	0.0574702
chr3	17235785	17235837	53	183798	PLCL2	ENSG00000154822	49.3147	70.6802	21.3655	9.09819	3.06693	0.0568611	chr1	244892824	244893185	362	75770	DESI2	ENSG00000121644	58.7164	30.8986	-27.8178	-43.267	-3.04078	0.0569377
chr3	28618598	28619478	881	66103	ZCWPW2	ENSG00000206559	20.6124	49.5146	28.9022	36.0661	3.96432	0.0634013	chr1	244996640	244996842	203	-1781	COX20	ENSG00000203667	63.888	32.6859	-31.202	-31.6323	-3.45394	0.0521927
chr3	31903434	31903921	488	-31836	OSBPL10	ENSG00000144645	65.0918	82.2484	17.1566	15.1724	3.06615	0.0547234	chr1	245629269	245629824	556	-44479	KIF26B	ENSG00000162849	62.5194	41.9303	-20.5891	-29.3436	-3.02649	0.0567518
chr3	36806598	36806822	225	-25245	DCLK3	ENSG00000163673	53.1716	77.5823	24.4107	19.1692	3.29167	0.0592094	chr1	245778054	245778694	641	103749	KIF26B	ENSG00000162849	65.28	38.0208	-27.2592	-60.9743	-3.18748	0.0696091
chr3	37094843	37095448	606	27375	MLH1	ENSG00000076242	47.7748	66.2853	18.5105	26.3147	3.36186	0.0547294	chr1	245837056	245837098	43	162751	KIF26B	ENSG00000162849	69.5326	45.2458	-24.2868	-17.4773	-4.22678	0.053158
chr3	37123936	37124202	267	1038	LRRFIP2	ENSG00000093167	56.1786	77.3808	21.2022	10.2962	3.47732	0.0549862	chr1	246109855	246111027	1173	246001	SMYD3	ENSG00000185420	68.8784	36.8061	-32.0723	-118.744	-3.24374	0.0570888
chr3	37124585	37124797	213	443	LRRFIP2	ENSG00000093167	58.2275	78.3105	20.083	9.58232	3.31436	0.0549862	chr1	246125067	246125389	323	231639	SMYD3	ENSG00000185420	69.0277	43.3849	-25.6428	-29.719	-3.05376	0.0656874
chr3	38424183	38424617	435	35836	XYLB	ENSG00000093217	45.5379	63.4866	17.9486	22.7496	3.37577	0.0558095	chr1	246535937	246536067	131	-17299	SMYD3	ENSG00000185420	80.74	60.9506	-19.7894	-20.964	-3.48073	0.0521287
chr3	40334471	40334519	49	-16655	EIF1B	ENSG00000114784	47.6211	69.0363	21.4153	9.46875	3.17404	0.0605973	chr1	246567948	246568907	960	11806	SMYD3	ENSG00000185420	77.2728	56.1192	-21.1536	-38.7951	-3.05348	0.0571309
chr3	42544646	42544826	181	530	VIPR1	ENSG00000114812	39.5458	62.1289	22.5831	19.9933	3.55996	0.0605349	chr1	246845306	246846184	879	-41164	SCCPDH	ENSG00000143653	58.7032	35.51	-23.1932	-59.9198	-3.18909	0.0556784
chr3	43789213	43789475	263	36013	ABHD5	ENSG00000011198	42.1891	60.6966	18.5075	22.7445	4.33983	0.0547445	chr1	246947910	246948762	853	60560	SCCPDH	ENSG00000143653	68.291	29.9797	-38.3113	-88.5059	-3.47407	0.0821008
chr3	43789799	43790354	556	36599	ABHD5	ENSG00000011198	40.6264	61.5232	20.8968	42.6991	4.98469	0.0552209	chr1	249135843	249136511	669	2489	ZNF672	ENSG00000171161	74.7546	55.1621	-19.5925	-47.8188	-3.20354	0.0549403
chr3	45086934	45087527	594	15311	CLEC3B	ENSG00000163815	58.4466	84.0672	25.6205	43.5352	3.83964	0.0575095	chr1	249153882	249154214	333	-597	ZNF692	ENSG00000171163	57.0424	35.3622	-21.6802	-24.8122	-3.14274	0.0537702
chr3	47446687	47446769	83	24176	PTPN23	ENSG00000076201	48.2139	64.1372	15.9233	9.43851	3.20882	0.0547544	chr2	366617	367067	451	-77765	FAM150B	ENSG00000189292	63.3882	45.8151	-17.5731	-58.8662	-3.00636	0.0582798
chr3	50382492	50382590	99	561	ZMYND10	ENSG00000004838	43.3693	62.3895	19.0202	9.71591	3.36713	0.0610897	chr2	367417	367528	112	-78565	FAM150B	ENSG00000189292	57.8878	41.2149	-16.6728	-16.5646	-3.16503	0.0582798
chr3	50604337	50604578	242	517	C3orf18	ENSG00000088543	29.3803	51.8634	22.4831	14.2	4.08425	0.0595358	chr2	621864	622282	419	53492	TMEM18	ENSG00000151353	76.3832	57.9613	-18.422	-58.2282	-3.091	0.0543849
chr3	52334160	52334772	613	9829	GLYCTK	ENSG00000168237	38.3325	56.4094	18.077	37.7515	3.71249	0.0547234	chr2	675921	676138	218	-145	TMEM18	ENSG00000151353	49.7081	24.8797	-24.8284	-23.2624	-3.34762	0.0555017
chr3	53357537	53358392	856	23159	DCP1A	ENSG00000162290	50.6907	78.8608	28.17	76.6455	6.21085	0.0564151	chr2	1614089	1614242	154	82099	PXDN	ENSG00000130508	71.8515	47.4239	-24.4276	-33.2268	-3.00598	0.076869
chr3	54382573	54383942	1370	170749	CACNA2D3	ENSG00000157445	31.2707	53.539	22.2683	67.4208	3.89322	0.056689	chr2	1629049	1629354	306	66987	PXDN	ENSG00000130508	70.3886	38.9219	-31.4666	-51.2375	-3.03022	0.0950808
chr3	62303995	62304145	151	-502	C3orf14	ENSG00000114405	48.1478	66.825	18.6772	19.327	3.30224	0.0549889	chr2	1656310	1657843	1534	38498	PXDN	ENSG00000130508	66.9339	16.2387	-50.6952	-203.974	-3.8463	0.0771703
chr3	65394159	65395285	1127	69023	MAGI1	ENSG00000151276	39.4124	61.0646	21.6522	35.7871	3.32758	0.0548021	chr2	1746186	1746359	174	1854	PXDN	ENSG00000130508	60.8986	31.0062	-29.8924	-52.5439	-4.32952	0.0571723
chr3	65535506	65535536	31	47873	MAGI1	ENSG00000151276	48.2694	68.1437	19.8744	11.2612	3.82447	0.058462	chr2	2856148	2856450	303	-521181	MYT1L	ENSG00000186487	58.2885	40.7521	-17.5364	-18.8859	-3.07025	0.0545824
chr3	67766395	67766486	92	-61356	SUCLG2	ENSG00000172340	57.1981	76.602	19.4039	9.02269	3.00835	0.0548931	chr2	2934894	2935359	466	446201	TSSC1	ENSG00000032389	47.064	31.1452	-15.9189	-19.4317	-3.04417	0.0587772
chr3	74661182	74661992	811	-90890	CNTN3	ENSG00000113805	30.1005	55.9053	25.8048	24.1832	3.69309	0.0745432	chr2	3044568	3045899	1332	335661	TSSC1	ENSG00000032389	51.0918	23.4114	-27.6803	-134.161	-3.01256	0.0955775
chr3	96534780	96534877	98	1144	EPHA6	ENSG00000080224	28.4474	55.4941	27.0467	10.4949	3.54634	0.0571802	chr2	3173342	3173567	226	207993	TSSC1	ENSG00000032389	70.6847	55.0669	-15.6178	-21.3837	-3.00662	0.05346
chr3	97691754	97692102	349	-452	MINA	ENSG00000170854	49.1268	70.6621	21.5353	40.2107	3.94988	0.0600261	chr2	3197387	3197729	343	183831	TSSC1	ENSG00000032389	70.9167	53.6627	-17.254	-15.2952	-3.00034	0.0554303
chr3	106361447	106361740	294	-734447	CCDC54	ENSG00000138483	55.1497	73.6443	18.4946	14.844	3.939	0.0549806	chr2	3699195	3699724	530	-6060	ALLC	ENSG00000151360	49.4941	30.4146	-19.0795	-141.584	-3.00381	0.05346
chr3	118962178	118962348	171	-2227	B4GALT4	ENSG00000121578	42.8271	68.8745	26.0474	18.9258	3.84828	0.0630512	chr2	8628375	8628738	364	-190236	ID2	ENSG00000115738	68.6672	55.7191	-12.9481	-38.6676	-3.03922	0.0534888
chr3	121255938	121256010	73	8842	POLQ	ENSG00000051341	48.5418	71.9957	23.4539	11.115	3.72519	0.0574129	chr2	8684749	8685566	818	-133408	ID2	ENSG00000115738	73.8607	49.1586	-24.7021	-125.234	-3.18983	0.0580177
chr3	121256332	121256811	480	8041	POLQ	ENSG00000051341	51.4435	73.3575	21.914	17.3174	3.67869	0.0574129	chr2	9348522	9348898	377	1627	ASAP2	ENSG00000151693	51.3663	27.5826	-23.7837	-16.1452	-3.32695	0.0565597
chr3	122748086	122748331	246	-1426	SEMA5B	ENSG00000082684	18.0203	44.2673	26.247	17.183	4.50623	0.0574892	chr2	9403736	9404095	360	56841	ASAP2	ENSG00000151693	73.5126	41.5256	-31.987	-47.2166	-3.0084	0.0668629
chr3	122888209	122888548	340	-32256	SEC22A	ENSG00000121542	59.7534	77.7982	18.0448	13.7659	3.81672	0.0547234	chr2	9437136	9438176	1041	90241	ASAP2	ENSG00000151693	71.8146	47.6853	-24.1292	-62.1063	-3.03194	0.0603562
chr3	123255362	123255755	394	-35821	PTPLB	ENSG00000206527	58.5373	83.761	25.2236	22.7239	4.04564	0.0561265	chr2	9941070	9941937	868	-41545	TAF1B	ENSG00000115750	65.4847	35.1366	-30.3481	-104.692	-3.09813	0.0744646
chr3	123336634	123337080	447	2280	MYLK	ENSG00000065534	53.4663	72.1172	18.6509	25.7775	3.27462	0.0551284	chr2	10123164	10124080	917	-11353	GRHL1	ENSG00000134317	58.7694	39.6742	-19.0952	-57.9456	-3.02349	0.0537479
chr3	123517517	123518603	1087	-4828	MYLK	ENSG00000065534	28.0155	54.7333	26.7178	44.0178	3.76752	0.06609	chr2	10182435	10182644	210	-331	KLF11	ENSG00000172059	40.6275	14.083	-26.5445	-31.4463	-3.00871	0.0819086
chr3	124555851	124556321	471	4076	ITGB5	ENSG00000082781	22.1041	44.2359	22.1318	21.1142	3.84788	0.0728211	chr2	10218699	10218910	212	1627	CYS1	ENSG00000205795	59.4253	39.0387	-20.3867	-25.3849	-3.02724	0.0591605
chr3	124556653	124556992	340	3405	ITGB5	ENSG00000082781	30.8191	54.7215	23.9025	22.528	3.93403	0.0728211	chr2	10334075	10334505	431	52565	C2orf48	ENSG00000163009	52.3096	34.1494	-18.1603	-46.1869	-3.21584	0.0552716
chr3	124772880	124773151	272	1650	HEG1	ENSG00000173706	22.643	44.1239	21.4809	29.1874	4.66555	0.0591419	chr2	10418343	10419037	695	-23977	HPCAL1	ENSG00000115756	64.209	37.499	-26.7101	-70.4802	-3.10469	0.0641486
chr3	125553435	125554187	753	101694	ALG1L	ENSG00000189366	45.8092	67.1447	21.3355	75.1552	3.2529	0.0585173	chr2	10444857	10444998	142	1030	HPCAL1	ENSG00000115756	43.6488	20.5635	-23.0853	-21.7558	-3.0186	0.0741641
chr3	125898467	125898783	317	0	ALDH1L1	ENSG00000144908	17.9667	36.1915	18.2248	52.9295	3.95469	0.0586688	chr2	10469853	10470343	491	26026	HPCAL1	ENSG00000115756	76.1591	56.442	-19.717	-44.2993	-3.0329	0.0546157
chr3	127498775	127499837	1063	3013	MGLL	ENSG00000074416	36.4519	61.9837	25.5318	54.8732	5.2296	0.0589262	chr2	10572872	10572996	125	12724	HPCAL1	ENSG00000115756	59.4106	34.1067	-25.3039	-29.3859	-3.09142	0.0763234
chr3	128181787	128182327	541	3483	DNAJB8	ENSG00000179407	61.9297	85.7136	23.7839	94.4324	4.37222	0.0555101	chr2	10645070	10645803	734	-56439	ODC1	ENSG00000115758	74.1609	54.6822	-19.4787	-50.9614	-3.00659	0.0555071
chr3	128878449	128878683	235	1195	ISY1-RAB43	ENSG00000261796	60.45	77.6374	17.1874	9.58089	3.40761	0.0549066	chr2	11051459	11051648	190	-414	KCNF1	ENSG00000162975	61.8882	44.1735	-17.7146	-38.6391	-3.22304	0.0573872
chr3	129079387	129080158	772	-44266	H1FX	ENSG00000184897	45.9211	67.1819	21.2608	50.5914	3.60737	0.0687748	chr2	11924672	11924909	238	-2289	LPIN1	ENSG00000134324	48.4886	30.1897	-18.2989	-23.4519	-3.00343	0.0543797
chr3	129093640	129093962	323	53497	EFCAB12	ENSG00000172771	52.6458	72.0629	19.4171	27.2672	3.50216	0.0580831	chr2	12856078	12856213	136	-801	TRIB2	ENSG00000071575	44.221	24.1429	-20.0781	-25.2117	-3.00085	0.0669113
chr3	133663983	133664773	791	-15326	C3orf36	ENSG00000221972	43.1297	67.9704	24.8408	62.4517	3.74072	0.0590858	chr2	12964700	12965635	936	106335	TRIB2	ENSG00000071575	68.2672	40.8044	-27.4628	-63.067	-3.62632	0.0628438
chr3	135980647	135981375	729	6486	PCCB	ENSG00000114054	61.8081	82.6661	20.858	28.8644	4.09738	0.0560497	chr2	18972590	18973775	1186	-201751	NT5C1B	ENSG00000185013	73.2492	52.6429	-20.6063	-48.8665	-3.20576	0.055717
chr3	136536761	136537267	507	-593	SLC35G2	ENSG00000168917	24.9354	47.5522	22.6168	30.8623	4.23977	0.0619203	chr2	19774648	19775301	654	-216233	OSR1	ENSG00000143867	64.2667	41.9255	-22.3412	-28.1246	-3.03021	0.0573177
chr3	141031313	141031521	209	-11533	ZBTB38	ENSG00000177311	52.4316	71.7072	19.2757	36.1421	4.33641	0.0558751	chr2	20785752	20786228	477	38304	HS1BP3	ENSG00000118960	87.4965	66.604	-20.8925	-47.6486	-3.01031	0.0559309
chr3	142666489	142666543	55	14548	PAQR9	ENSG00000188582	31.2194	46.7767	15.5573	15.0403	3.01174	0.0556547	chr2	20825587	20826148	562	-934	HS1BP3	ENSG00000118960	68.6162	46.1578	-22.4584	-47.8373	-3.07001	0.056382
chr3	147117491	147117748	258	3836	ZIC4	ENSG00000174963	38.7473	59.8762	21.1289	24.1014	3.73193	0.0551654	chr2	20867526	20867842	317	1101	GDF7	ENSG00000143869	58.2012	21.1201	-37.0811	-93.5652	-3.08221	0.0713607
chr3	150872535	150872752	218	-35950	MED12L	ENSG00000144893	48.2276	73.269	25.0414	23.7944	3.52817	0.0547237	chr2	21264880	21265367	488	1466	APOB	ENSG00000084674	40.6071	22.4639	-18.1431	-58.5918	-3.244	0.0575309
chr3	150873338	150874363	1026	-34339	MED12L	ENSG00000144893	37.8372	65.7781	27.9409	53.748	4.18673	0.0547237	chr2	23515943	23517445	1503	-90642	KLHL29	ENSG00000119771	49.7704	36.9848	-12.7856	-81.2214	-3.20666	0.0568423
chr3	155594207	155594398	192	5767	GMPS	ENSG00000163655	56.7813	76.0274	19.2461	13.6551	3.53774	0.057194	chr2	23574031	23574147	117	-33940	KLHL29	ENSG00000119771	50.7018	35.4414	-15.2604	-10.0506	-3.30011	0.0559644
chr3	155594778	155594961	184	6338	GMPS	ENSG00000163655	58.756	76.9379	18.182	13.084	3.43841	0.057194	chr2	23607474	23607599	126	-488	KLHL29	ENSG00000119771	58.2017	41.2483	-16.9534	-13.1254	-3.2162	0.0563386
chr3	158430724	158431352	629	-18634	MFSD1	ENSG00000118855	64.2984	87.0247	22.7264	38.4348	3.2915	0.0576546	chr2	23641908	23642379	472	33819	KLHL29	ENSG00000119771	74.2868	53.8323	-20.4546	-48.2253	-3.12061	0.0541039
chr3	159557493	159557888	396	0	SCHIP1	ENSG00000151967	66.3525	86.2642	19.9117	54.0366	3.68094	0.0600646	chr2	23647005	23647337	333	38916	KLHL29	ENSG00000119771	65.9964	46.2122	-19.7842	-31.5313	-3.0548	0.0552522
chr3	159942159	159942453	295	-969	C3orf80	ENSG00000180044	48.0864	67.1313	19.0449	38.8639	3.35547	0.0651492	chr2	23703661	23704185	525	43028	AC011239.1	ENSG00000224361	71.5348	51.4307	-20.1041	-26.7663	-3.12951	0.0535448
chr3	160166365	160166400	36	324	TRIM59	ENSG00000213186	9.98996	32.5665	22.5765	10.8942	3.70365	0.0593504	chr2	23829388	23829451	64	-35810	KLHL29	ENSG00000119771	89.5565	73.5576	-15.9989	-9.26798	-3.01949	0.0554531
chr3	169687091	169687570	480	2494	SEC62	ENSG00000008952	33.3834	54.962	21.5786	16.534	3.37877	0.057687	chr2	23886033	23886100	68	20770	KLHL29	ENSG00000119771	65.6352	44.0704	-21.5648	-16.8118	-3.15438	0.0642896
chr3	171175707	171176032	326	1819	TNIK	ENSG00000154310	16.7837	41.9698	25.186	74.5566	4.42415	0.0590148	chr2	24066371	24066885	515	-10889	ATAD2B	ENSG00000119778	88.1748	66.156	-22.0188	-28.4676	-3.02275	0.0535105
chr3	181503633	181503740	108	73910	SOX2	ENSG00000181449	39.4715	56.2864	16.815	12.4492	3.23595	0.055298	chr2	24581704	24582127	424	1050	ITSN2	ENSG00000198399	59.2787	35.5957	-23.6831	-38.3332	-3.36886	0.0583724
chr3	183184127	183184920	794	-37560	MCF2L2	ENSG00000053524	43.1053	68.9492	25.8439	36.6088	4.37991	0.0604705	chr2	25084479	25084729	251	10831	ADCY3	ENSG00000138031	76.8133	50.7698	-26.0434	-33.8438	-3.18241	0.0587272
chr3	183498041	183498366	326	4261	YEATS2	ENSG00000163872	61.5804	81.1919	19.6115	33.9178	4.4932	0.0574969	chr2	25299929	25300662	734	34596	EFR3B	ENSG00000084710	66.1658	46.2648	-19.901	-36.4337	-3.01164	0.0627755
chr3	184063386	184063816	431	5127	FAM131A	ENSG00000175182	29.4409	45.7379	16.297	26.3455	3.39285	0.0598755	chr2	25427250	25427304	55	-35477	POMC	ENSG00000115138	42.7579	21.9759	-20.782	-33.1583	-3.00693	0.075727
chr3	186152690	186152800	111	-72663	DGKG	ENSG00000058866	58.7894	79.0043	20.215	13.2555	3.33777	0.062572	chr2	25500357	25500530	174	-25176	DNMT3A	ENSG00000119772	53.7479	20.3586	-33.3893	-31.2115	-3.00996	0.0895093
chr3	186489868	186490115	248	-10878	EIF4A2	ENSG00000156976	38.1579	58.3238	20.1659	53.2446	3.87239	0.055435	chr2	26951067	26951473	407	35447	KCNK3	ENSG00000171303	72.1836	43.2656	-28.918	-157.839	-3.00007	0.103597
chr3	188510505	188511356	852	-153646	TPRG1	ENSG00000188001	61.3615	82.5263	21.1648	50.4113	3.48669	0.0620611	chr2	27256967	27257157	191	1121	TMEM214	ENSG00000119777	82.3351	60.204	-22.1311	-20.1682	-3.61883	0.0542631
chr3	189817021	189817197	177	17239	LEPREL1	ENSG00000090530	75.2725	89.9519	14.6794	18.4014	3.08926	0.0594416	chr2	27580500	27580516	17	-631	GTF3C2	ENSG00000115207	58.65	38.8832	-19.7667	-9.12925	-3.01106	0.0558839
chr3	193896650	193896812	163	42715	HES1	ENSG00000114315	45.1947	69.1623	23.9676	9.13959	3.07298	0.0625854	chr2	27805389	27805436	48	-460	ZNF512	ENSG00000243943	79.6594	63.2205	-16.439	-12.0947	-3.00373	0.0534836
chr3	194380894	194381746	853	-7062	LSG1	ENSG00000041802	57.4069	80.0624	22.6555	40.3773	4.71219	0.055902	chr2	28111920	28112696	777	-111	BRE	ENSG00000158019	71.6306	46.1622	-25.4685	-40.4666	-3.15998	0.0565597
chr3	194382279	194382452	174	-8447	LSG1	ENSG00000041802	43.9886	71.7315	27.7429	14.8081	4.99216	0.055902	chr2	28620635	28621707	1073	2055	FOSL2	ENSG00000075426	38.3987	14.4505	-23.9482	-69.8865	-3.04999	0.054295
chr3	194382821	194382919	99	-8989	LSG1	ENSG00000041802	52.3043	73.098	20.7937	22.1389	3.91885	0.055902	chr2	30456376	30456586	211	1329	LBH	ENSG00000213626	53.8822	20.6443	-33.2379	-17.8945	-3.96661	0.0697125
chr3	194756414	194756718	305	86202	XXYLT1	ENSG00000173950	60.0706	77.7672	17.6966	47.6359	3.26263	0.0612269	chr2	30457078	30457233	156	2031	LBH	ENSG00000213626	47.6458	22.5245	-25.1213	-13.091	-3.05736	0.0705259
chr3	195942470	195942717	248	-657	SLC51A	ENSG00000163959	47.6555	64.4672	16.8117	21.6366	3.13804	0.0547234	chr2	33171183	33171359	177	-679	LTBP1	ENSG00000049323	57.4089	34.3036	-23.1053	-24.1823	-3.81009	0.0598677
chr3	197120903	197121381	479	-94731	DLG1	ENSG00000075711	42.8099	66.6272	23.8173	61.2785	4.66943	0.0547461	chr2	36934440	36935160	721	10419	VIT	ENSG00000205221	67.5818	44.0029	-23.5789	-45.7488	-3.10006	0.0616138
chr4	1048522	1048748	227	42282	FGFRL1	ENSG00000127418	24.5975	47.5119	22.9144	15.3507	3.11874	0.068176	chr2	37384559	37384708	150	-350	EIF2AK2	ENSG00000055332	65.6368	40.5914	-25.0453	-25.3553	-3.27979	0.0558886
chr4	1544145	1544317	173	112817	FAM53A	ENSG00000174137	42.6432	66.5173	23.8741	27.5838	3.12582	0.0624799	chr2	37683800	37684097	298	88375	QPCT	ENSG00000115828	73.0723	42.3774	-30.6949	-15.5155	-3.75781	0.0588679
chr4	1762289	1762729	441	32157	TACC3	ENSG00000013810	31.5556	53.751	22.1954	85.6311	4.01728	0.057044	chr2	37684427	37685072	646	89002	QPCT	ENSG00000115828	70.939	42.5406	-28.3984	-45.8733	-3.2002	0.0588679
chr4	2354857	2355405	549	11125	ZFYVE28	ENSG00000159733	51.9393	77.6326	25.6933	40.0089	3.83592	0.064658	chr2	37812591	37812921	331	61879	CDC42EP3	ENSG00000163171	51.1838	29.5224	-21.6614	-12.6927	-3.02006	0.0598877
chr4	3125818	3126298	481	-35790	HTT	ENSG00000197386	39.8519	71.2787	31.4268	30.3529	4.43213	0.0653571	chr2	37864640	37864989	350	9811	CDC42EP3	ENSG00000163171	68.3505	49.7587	-18.5918	-13.0758	-3.0997	0.05346
chr4	3416176	3416219	44	-27394	HGFAC	ENSG00000109758	54.1136	79.7992	25.6856	9.03618	3.01363	0.0753303	chr2	37865348	37866465	1118	8335	CDC42EP3	ENSG00000163171	73.8219	53.5092	-20.3127	-34.2191	-3.04347	0.05346
chr4	3538371	3538493	123	-4084	LRPAP1	ENSG00000163956	36.5379	56.4706	19.9327	9.90193	3.34587	0.057284	chr2	38264690	38265178	489	38039	CYP1B1	ENSG00000138061	36.2054	21.0236	-15.1818	-44.2024	-3.03287	0.0589531
chr4	3955312	3955345	34	187186	ADRA2C	ENSG00000184160	47.7187	66.1527	18.434	9.10616	3.05851	0.058616	chr2	38304718	38305157	440	-1394	CYP1B1	ENSG00000138061	79.9333	45.2909	-34.6424	-86.2049	-3.08929	0.0641074
chr4	4325702	4326100	399	21347	ZBTB49	ENSG00000168826	53.7982	75.2625	21.4643	16.3447	3.36768	0.0619489	chr2	38319313	38320028	716	-15989	CYP1B1	ENSG00000138061	70.7681	44.6707	-26.0974	-47.0406	-3.19958	0.0649164
chr4	4341177	4341529	353	-8337	NSG1	ENSG00000168824	28.4492	46.2116	17.7623	49.0349	3.08632	0.0580245	chr2	39696586	39697112	527	-32132	MAP4K3	ENSG00000011566	69.1383	49.0219	-20.1164	-19.6526	-3.18889	0.05346
chr4	5193978	5194553	576	52614	STK32B	ENSG00000152953	38.8499	62.7315	23.8816	41.8807	3.42268	0.0624083	chr2	42329637	42330049	413	54476	PKDCC	ENSG00000162878	61.6842	31.4311	-30.2532	-95.9414	-3.11877	0.0568202
chr4	5871784	5872269	486	17938	CRMP1	ENSG00000072832	48.7574	74.0853	25.328	47.8079	3.63855	0.0587592	chr2	42397720	42397836	117	1118	EML4	ENSG00000143924	40.3693	19.0274	-21.3419	-10.3517	-3.35114	0.0565404
chr4	6279946	6280928	983	8368	WFS1	ENSG00000109501	35.0529	57.7095	22.6566	85.5643	3.77716	0.0611431	chr2	42569043	42570150	1108	18138	COX7A2L	ENSG00000115944	76.0891	46.3005	-29.7886	-70.5684	-3.07865	0.0544279
chr4	6666641	6666649	9	24222	MRFAP1	ENSG00000179010	23.5492	41.0283	17.4791	9.04129	3.01829	0.0588043	chr2	42865452	42865758	307	68927	MTA3	ENSG00000057935	66.8527	45.9961	-20.8566	-22.9837	-3.21267	0.0544893
chr4	7425378	7426204	827	10495	PSAPL1	ENSG00000178597	33.4857	57.6083	24.1226	79.2689	4.41456	0.0578097	chr2	43081685	43082219	535	-61952	HAAO	ENSG00000162882	72.3312	54.7904	-17.5408	-40.5317	-3.03189	0.0538367
chr4	7540127	7540534	408	-103426	PSAPL1	ENSG00000178597	37.605	60.8867	23.2818	27.3367	3.08218	0.0620698	chr2	43108014	43108368	355	-88281	HAAO	ENSG00000162882	60.0094	45.0731	-14.9363	-15.6903	-3.00851	0.0552348
chr4	8075762	8076576	815	-2048	ABLIM2	ENSG00000163995	46.0237	71.8305	25.8068	39.4976	3.58925	0.0712497	chr2	43189623	43189943	321	-169890	HAAO	ENSG00000162882	73.0248	39.949	-33.0758	-42.6985	-3.08935	0.0806461
chr4	8268699	8269075	377	-2416	HTRA3	ENSG00000170801	37.3484	60.5387	23.1903	49.8283	3.42187	0.069924	chr2	43327810	43327967	158	125780	ZFP36L2	ENSG00000152518	72.2905	48.4929	-23.7976	-30.1174	-3.16904	0.062876
chr4	12609950	12610261	312	772956	RAB28	ENSG00000157869	28.1258	46.1158	17.9899	12.5496	3.16513	0.0577772	chr2	43329650	43329946	297	123801	ZFP36L2	ENSG00000152518	54.7176	33.2264	-21.4911	-15.4184	-3.00322	0.0606256
chr4	15684603	15684888	286	1173	FAM200B	ENSG00000237765	45.039	66.647	21.6079	17.9773	3.72115	0.0610306	chr2	43367147	43368106	960	85641	ZFP36L2	ENSG00000152518	83.9011	59.7425	-24.1586	-75.9646	-3.18683	0.0630946
chr4	20441911	20442194	284	-102047	SLIT2	ENSG00000145147	51.4406	70.3754	18.9348	12.5689	3.18453	0.0602045	chr2	43445809	43446066	258	7681	ZFP36L2	ENSG00000152518	28.8378	10.5045	-18.3333	-21.9496	-3.02943	0.0554458
chr4	22386663	22387273	611	57484	GPR125	ENSG00000152990	48.0499	65.6391	17.5892	24.7767	4.16636	0.057044	chr2	44016783	44018467	1685	12820	DYNC2LI1	ENSG00000138036	76.0636	51.2974	-24.7663	-57.3789	-3.14288	0.0541804
chr4	25369982	25370400	419	-8434	ANAPC4	ENSG00000053900	55.3998	75.7528	20.353	22.2476	3.22525	0.0587528	chr2	44059487	44059609	123	6279	ABCG5	ENSG00000138075	39.7316	24.4087	-15.3229	-12.7686	-3.04109	0.0552791
chr4	26493004	26493639	636	-919	CCKAR	ENSG00000163394	52.5756	78.8927	26.3171	35.2303	4.89653	0.057044	chr2	44494957	44495581	625	-7017	SLC3A1	ENSG00000138079	65.2149	43.7511	-21.4638	-25.8278	-3.51043	0.0577896
chr4	37689379	37689550	172	-1380	RELL1	ENSG00000181826	64.1996	84.5621	20.3625	19.6783	3.44236	0.0613947	chr2	44972145	44973356	1212	-195545	SIX3	ENSG00000138083	63.1972	43.02	-20.1772	-60.3532	-3.23155	0.0618152
chr4	38719348	38719434	87	-52917	AC021860.1	ENSG00000196355	55.8975	75.6995	19.802	9.42948	3.19349	0.0581697	chr2	45240373	45240726	354	-3803	SIX2	ENSG00000170577	65.4977	38.4256	-27.0721	-125.422	-3.02139	0.0678444
chr4	39044577	39044982	406	-1676	KLHL5	ENSG00000109790	18.2424	40.3413	22.099	31.1296	3.65741	0.0683987	chr2	45395138	45395252	115	-158568	SIX2	ENSG00000170577	71.5126	49.4549	-22.0577	-19.7139	-3.20131	0.0586956
chr4	40844354	40845551	1198	0	APBB2	ENSG00000163697	44.67	84.3468	39.6768	92.6736	3.67909	0.0910958	chr2	45418082	45419371	1290	-181512	SIX2	ENSG00000170577	49.7905	25.0611	-24.7294	-121.606	-3.13915	0.0607261
chr4	40925914	40926138	225	-30624	APBB2	ENSG00000163697	60.7818	79.3496	18.5677	21.598	3.13433	0.0581822	chr2	46163654	46163986	333	-64054	PRKCE	ENSG00000171132	54.1754	34.1979	-19.9775	-29.865	-3.07851	0.0567875
chr4	57162603	57163424	822	-19404	KIAA1211	ENSG00000109265	29.4832	53.131	23.6478	70.4477	4.72185	0.060835	chr2	46309126	46310309	1184	81084	PRKCE	ENSG00000171132	80.6085	57.3329	-23.2756	-76.2366	-3.08151	0.0544157
chr4	57814079	57814499	421	-29388	POLR2B	ENSG00000047315	52.6435	76.9808	24.3373	31.6069	4.5644	0.0579731	chr2	46527581	46527821	241	3039	EPAS1	ENSG00000116016	72.763	46.2773	-26.4858	-16.402	-3.09082	0.0725555
chr4	77507039	77507529	491	150785	SHROOM3	ENSG00000138771	23.4117	41.8823	18.4706	108.832	3.58029	0.0638793	chr2	46546770	46549037	2268	22228	EPAS1	ENSG00000116016	50.1503	21.6769	-28.4734	-84.4207	-3.06729	0.0587153
chr4	78697859	78698111	253	-34232	CNOT6L	ENSG00000138767	42.7075	62.9112	20.2037	13.7849	3.55999	0.0594718	chr2	46927893	46929425	1533	1566	SOCS5	ENSG00000171150	70.1214	46.3736	-23.7478	-52.783	-3.10526	0.055162
chr4	89515134	89515353	220	604	HERC3	ENSG00000138641	6.63714	32.6689	26.0317	17.201	6.09177	0.0593433	chr2	47399899	47400023	125	3626	CALM2	ENSG00000143933	66.6773	44.0942	-22.5831	-9.29538	-3.04262	0.0620387
chr4	99065219	99065442	224	-827	STPG2	ENSG00000163116	52.013	71.4417	19.4287	17.7692	3.94857	0.0587675	chr2	48636427	48636910	484	-30997	PPP1R21	ENSG00000162869	81.4112	58.5832	-22.828	-77.2251	-3.37804	0.0642836
chr4	99183896	99184723	828	1226	RAP1GDS1	ENSG00000138698	43.5438	77.9982	34.4545	61.2111	5.78703	0.0641878	chr2	53802846	53803524	679	189161	GPR75-ASB3	ENSG00000115239	57.4732	43.4103	-14.0629	-30.0864	-3.11732	0.0558518
chr4	100814608	100814686	79	846	LAMTOR3	ENSG00000109270	44.2691	62.6119	18.3429	10.4727	3.67187	0.0573619	chr2	53897590	53898063	474	94622	GPR75-ASB3	ENSG00000115239	54.7155	29.5733	-25.1422	-29.7684	-3.88717	0.0588346
chr4	101112553	101112735	183	-613	DDIT4L	ENSG00000145358	38.7335	58.3034	19.5699	22.3968	3.90563	0.0592454	chr2	54087549	54087741	193	-251	ASB3	ENSG00000270898	57.2226	38.7852	-18.4375	-10.0077	-3.19054	0.0547478
chr4	102270105	102270372	268	-669	PPP3CA	ENSG00000138814	36.0433	65.2269	29.1836	15.7429	4.18647	0.060347	chr2	54199025	54199184	160	779	ACYP2	ENSG00000170634	54.832	32.4183	-22.4137	-21.6187	-3.42778	0.0587279
chr4	103350341	103350667	327	-71818	NFKB1	ENSG00000109320	32.4311	61.5236	29.0925	14.5808	5.24368	0.0595831	chr2	54900310	54901158	849	-50520	EML6	ENSG00000214595	85.7564	52.5424	-33.214	-108.652	-3.16813	0.0778235
chr4	103351004	103351075	72	-71410	NFKB1	ENSG00000109320	14.2778	43.1603	28.8825	33.7028	4.91063	0.0595831	chr2	58273135	58273269	135	-459	VRK2	ENSG00000028116	75.9487	54.0766	-21.8721	-23.9563	-3.09698	0.0557189
chr4	103424559	103424757	199	26	NFKB1	ENSG00000109320	44.5593	65.2725	20.7132	9.22719	3.10394	0.0612282	chr2	60758001	60758579	579	21960	BCL11A	ENSG00000119866	51.9085	35.1902	-16.7183	-39.9858	-3.03957	0.0550866
chr4	103941471	103941896	426	-574	SLC9B1	ENSG00000164037	23.6474	44.2363	20.5889	47.5762	4.63439	0.0599553	chr2	63817086	63817431	346	626	MDH1	ENSG00000014641	60.5886	41.6428	-18.9458	-23.3106	-3.17616	0.05346
chr4	110510374	110510728	355	28227	CCDC109B	ENSG00000005059	46.5937	66.7932	20.1995	16.5768	3.3912	0.0571017	chr2	64244534	64244923	390	1282	VPS54	ENSG00000143952	48.6079	28.9898	-19.6181	-14.89	-3.09606	0.0536852
chr4	119199322	119199384	63	74773	PRSS12	ENSG00000164099	42.5572	63.1025	20.5453	13.2761	3.48602	0.0629879	chr2	64515630	64516695	1066	-144041	PELI1	ENSG00000197329	67.2015	44.7552	-22.4462	-70.0582	-3.07595	0.0587802
chr4	121841743	121841910	168	2093	PRDM5	ENSG00000138738	23.0738	54.8502	31.7764	13.7224	4.72383	0.0597801	chr2	64680253	64680323	71	-779	LGALSL	ENSG00000119862	73.0131	58.0064	-15.0067	-18.4614	-3.04394	0.0582705
chr4	121846279	121846382	104	-2253	PRDM5	ENSG00000138738	45.2019	73.9664	28.7645	9.26248	3.18745	0.0767628	chr2	65177159	65177201	43	-38422	SLC1A4	ENSG00000115902	75.1694	59.3837	-15.7857	-9.34223	-3.0552	0.0603084
chr4	123938410	123938457	48	94180	SPATA5	ENSG00000145375	52.0953	83.1802	31.0849	22.9552	4.88944	0.0655148	chr2	65177634	65178152	519	-37471	SLC1A4	ENSG00000115902	68.0208	42.4781	-25.5427	-66.7135	-4.50952	0.0603084
chr4	125571094	125571467	374	62419	ANKRD50	ENSG00000151458	54.1647	79.5907	25.426	25.7941	4.65751	0.0571031	chr2	65178463	65178756	294	-36867	SLC1A4	ENSG00000115902	66.5057	49.1738	-17.3319	-10.3147	-3.01435	0.060309
chr4	139761026	139761306	281	-175636	CCRN4L	ENSG00000151014	27.8713	50.2591	22.3878	16.4184	3.44656	0.0591122	chr2	65217528	65217783	256	992	SLC1A4	ENSG00000115902	42.8986	21.0857	-21.813	-42.2266	-3.01559	0.0692003
chr4	139761959	139762262	304	-174680	CCRN4L	ENSG00000151014	26.9335	50.4188	23.4853	17.2087	3.5978	0.0591122	chr2	65284635	65284868	234	1035	CEP68	ENSG00000011523	59.6679	36.4127	-23.2552	-16.1162	-3.7319	0.0550476
chr4	140964941	140965663	723	108459	MAML3	ENSG00000196782	41.2261	65.3629	24.1368	38.5494	3.31937	0.0696582	chr2	65358737	65359122	386	-1496	RAB1A	ENSG00000138069	89.7758	65.2885	-24.4873	-40.0468	-3.19868	0.0679078
chr4	141006556	141007191	636	66931	MAML3	ENSG00000196782	19.5654	44.6338	25.0685	35.7134	3.35349	0.0641723	chr2	65577036	65577189	154	-5115	SPRED2	ENSG00000198369	68.9149	47.7283	-21.1865	-12.5799	-3.05771	0.0559303
chr4	141070701	141070963	263	3159	MAML3	ENSG00000196782	31.1176	53.8232	22.7056	23.8317	4.48089	0.0577632	chr2	65656745	65657476	732	1834	SPRED2	ENSG00000198369	52.6948	19.6274	-33.0674	-90.3134	-3.89122	0.0575534
chr4	141347319	141347766	448	777	CLGN	ENSG00000153132	23.9268	49.0092	25.0824	26.6055	5.88834	0.0630502	chr2	65664452	65664551	100	-4680	SPRED2	ENSG00000198369	60.7205	39.6245	-21.096	-10.2543	-3.15772	0.0589548
chr4	141349360	141349428	69	-237	CLGN	ENSG00000153132	23.7414	42.4263	18.6849	10.0639	3.40301	0.0633803	chr2	67625469	67625560	92	1017	ETAA1	ENSG00000143971	78.1527	59.3915	-18.7612	-20.7618	-3.02573	0.05346
chr4	142558507	142559149	643	406	IL15	ENSG00000164136	24.5201	55.2408	30.7207	54.3796	7.81547	0.0578402	chr2	67742299	67742669	371	117847	ETAA1	ENSG00000143971	75.2395	54.153	-21.0865	-32.6087	-3.22356	0.0556253
chr4	146860717	146860934	218	-929	ZNF827	ENSG00000151612	17.3805	50.7572	33.3767	16.7499	6.42249	0.061833	chr2	67743060	67743930	871	118608	ETAA1	ENSG00000143971	61.2036	36.1769	-25.0266	-63.9304	-3.9216	0.0569512
chr4	152329013	152329364	352	-1033	FAM160A1	ENSG00000164142	31.5184	51.4337	19.9153	72.8116	3.66067	0.0579532	chr2	70312615	70313001	387	-1583	PCBP1	ENSG00000169564	41.4857	17.9638	-23.5219	-31.4468	-3.45047	0.0555638
chr4	152595380	152595502	123	86634	PET112	ENSG00000059691	41.2369	58.4857	17.2488	9.27345	3.14948	0.0582289	chr2	70350546	70350972	427	35960	PCBP1	ENSG00000169564	67.6494	39.8096	-27.8398	-51.7468	-3.08072	0.0626313
chr4	153882729	153883014	286	18593	FHDC1	ENSG00000137460	45.2147	68.3804	23.1657	12.8827	3.38814	0.0656122	chr2	70487442	70488498	1057	1890	PCYOX1	ENSG00000116005	76.7782	47.4552	-29.323	-69.6046	-3.21826	0.0545699
chr4	155413677	155413948	272	-746	DCHS2	ENSG00000197410	41.3585	66.1679	24.8094	42.2982	3.81941	0.0624203	chr2	71294689	71294864	176	-566	NAGK	ENSG00000124357	37.2344	14.465	-22.7694	-19.5505	-3.02942	0.0558108
chr4	157898689	157898799	111	-6142	PDGFC	ENSG00000145431	39.5706	57.3269	17.7563	18.9745	3.26605	0.0603056	chr2	72172293	72173298	1006	196914	CYP26B1	ENSG00000003137	66.2371	47.3467	-18.8904	-69.1319	-3.0116	0.0564586
chr4	160116227	160116719	493	-71313	RAPGEF2	ENSG00000109756	61.9753	80.4078	18.4325	24.0853	3.57199	0.0570444	chr2	73338218	73338482	265	1663	RAB11FIP5	ENSG00000135631	53.1053	35.2614	-17.8438	-9.19149	-3.02377	0.0566795
chr4	172736372	172736726	355	1717	GALNTL6	ENSG00000174473	23.4303	62.7597	39.3294	35.1273	4.46333	0.0706787	chr2	74213073	74213126	54	-16713	TET3	ENSG00000187605	44.1096	26.8025	-17.307	-9.79571	-3.0871	0.0548876
chr4	174218582	174219227	646	5299	GALNT7	ENSG00000109586	59.143	82.7943	23.6513	27.7172	3.13126	0.0570655	chr2	74215131	74215977	847	-13862	TET3	ENSG00000187605	72.6736	54.4772	-18.1964	-43.8309	-3.00128	0.0556923
chr4	177171520	177172441	922	-8692	ASB5	ENSG00000164122	34.8316	68.7234	33.8918	110.875	7.34272	0.0582097	chr2	74433185	74433709	525	7441	MTHFD2	ENSG00000065911	73.751	53.3788	-20.3722	-25.1594	-3.35768	0.0535514
chr4	177714877	177715040	164	-995	VEGFC	ENSG00000150630	43.7505	62.649	18.8984	9.60433	3.23534	0.064693	chr2	74730855	74731096	242	-411	LBX2	ENSG00000179528	69.1362	43.7396	-25.3966	-49.4625	-3.05675	0.075971
chr4	178225236	178225439	204	-5550	NEIL3	ENSG00000109674	60.4267	79.8643	19.4376	19.9939	3.34052	0.0570551	chr2	74780021	74780848	828	0	LOXL3	ENSG00000115318	37.0056	15.0941	-21.9115	-108.459	-3.36464	0.0548846
chr4	183060379	183061184	806	-4658	TENM3	ENSG00000218336	16.5714	46.4835	29.9121	76.2273	4.51912	0.0869668	chr2	74782647	74782845	199	0	LOXL3	ENSG00000115318	63.1393	45.0573	-18.082	-34.7242	-3.25481	0.0543213
chr4	183167363	183168463	1101	2780	TENM3	ENSG00000218336	28.1541	54.5572	26.4031	130.786	3.95954	0.0980261	chr2	75788798	75788947	150	-342	EVA1A	ENSG00000115363	51.1755	38.9909	-12.1846	-13.4611	-3.06278	0.0540456
chr4	183371503	183371602	100	1350	TENM3	ENSG00000218336	13.915	27.0189	13.1039	12.6716	3.19101	0.0576805	chr2	79006767	79007262	496	-245549	REG3G	ENSG00000143954	42.3175	22.9433	-19.3742	-52.0196	-3.12649	0.0550119
chr4	183728523	183728745	223	109034	DCTD	ENSG00000129187	58.7543	72.5401	13.7858	30.7809	3.7428	0.0579303	chr2	85196539	85196614	76	-1601	KCMF1	ENSG00000176407	51.6123	33.4517	-18.1606	-9.20992	-3.02007	0.0535517
chr4	185269266	185270191	926	69552	IRF2	ENSG00000168310	47.0099	75.1293	28.1194	89.4111	5.07061	0.0631405	chr2	85242992	85243479	488	43667	KCMF1	ENSG00000176407	65.1515	39.8018	-25.3497	-28.2359	-3.82923	0.0567087
chr4	185320826	185321185	360	18558	IRF2	ENSG00000168310	55.3716	72.949	17.5773	16.1276	3.36184	0.0604005	chr2	85359472	85359694	223	-838	TCF7L1	ENSG00000152284	50.9846	33.8998	-17.0848	-31.1151	-3.00288	0.0550669
chr4	185619002	185619287	286	19570	PRIMPOL	ENSG00000164306	48.1851	69.6888	21.5037	26.4858	3.35792	0.05706	chr2	85503461	85503927	467	51180	TGOLN2	ENSG00000152291	42.7369	21.6593	-21.0776	-47.4315	-3.11688	0.05346
chr4	186454948	186455126	179	1529	PDLIM3	ENSG00000154553	47.4109	81.3999	33.9891	9.22453	3.09778	0.0830004	chr2	85580781	85580839	59	783	RETSAT	ENSG00000042445	52.9878	34.0289	-18.9589	-9.63392	-3.16175	0.0565516
chr4	187878212	187878733	522	-230335	FAT1	ENSG00000083857	26.6877	63.3753	36.6876	12.793	3.26516	0.065637	chr2	85665521	85665777	257	3602	SH2D6	ENSG00000152292	46.8454	23.9316	-22.9138	-27.8444	-3.13431	0.0536209
chr4	190121362	190121852	491	-740090	FRG1	ENSG00000109536	40.0725	69.8145	29.742	31.7287	3.2367	0.0590878	chr2	85960294	85960391	98	-20625	ATOH8	ENSG00000168874	80.2991	62.1934	-18.1058	-12.6175	-3.07959	0.0554908
chr4	190708670	190709300	631	-152642	FRG1	ENSG00000109536	34.1395	60.0179	25.8784	42.6921	3.37689	0.0570745	chr2	86949705	86949766	62	-1459	CHMP3	ENSG00000115561	58.5928	31.1822	-27.4106	-17.3351	-4.18665	0.0613405
chr5	220077	220381	305	1643	SDHA	ENSG00000073578	13.5727	34.4359	20.8632	18.4879	4.00145	0.0561996	chr2	87018605	87019102	498	0	CD8A	ENSG00000153563	47.02	29.0881	-17.9319	-37.5468	-3.0428	0.0551525
chr5	432730	433364	635	4696	AHRR	ENSG00000063438	48.0627	72.3667	24.304	104.578	4.44031	0.0574258	chr2	87301206	87301267	62	-52230	PLGLB1	ENSG00000183281	54.2335	31.161	-23.0725	-17.9391	-3.43876	0.0608097
chr5	481557	482289	733	-8343	CTD-2228K2.5	ENSG00000188242	40.7016	67.2961	26.5945	117.428	4.67007	0.0773113	chr2	87768848	87769183	336	-278422	PLGLB2	ENSG00000125551	69.3931	49.7212	-19.6719	-25.0077	-3.01145	0.0639126
chr5	553869	554099	231	-29421	SLC9A3	ENSG00000066230	29.139	53.697	24.5581	14.978	3.89794	0.0587424	chr2	87834063	87834413	351	-213192	PLGLB2	ENSG00000125551	56.9442	39.6114	-17.3328	-12.5672	-3.02697	0.0549138
chr5	1007805	1008134	330	-809	NKD2	ENSG00000145506	51.1719	75.4235	24.2516	48.3013	3.2738	0.062899	chr2	91751313	91751689	377	-1212915	RP11-685N3.1	ENSG00000228325	70.3591	46.2689	-24.0902	-40.5141	-3.75553	0.0603199
chr5	1503714	1503979	266	20112	LPCAT1	ENSG00000153395	57.1164	76.7323	19.6159	39.6691	3.4175	0.0572742	chr2	95690050	95690291	242	-1137	MAL	ENSG00000172005	67.7649	44.8249	-22.94	-25.7011	-3.05133	0.0553128
chr5	1508680	1509025	346	15066	LPCAT1	ENSG00000153395	65.1967	84.8356	19.6389	34.4274	3.91642	0.0559792	chr2	95743371	95743533	163	44211	MRPS5	ENSG00000144029	51.4093	34.4833	-16.926	-9.57979	-3.08067	0.0566319
chr5	1832729	1832782	54	31199	NDUFS6	ENSG00000145494	43.7809	60.3238	16.5429	9.12089	3.05886	0.0564514	chr2	96970554	96970578	25	674	SNRNP200	ENSG00000144028	67.715	48.3035	-19.4114	-12.2817	-3.01049	0.0549432
chr5	3186409	3187581	1173	-408586	IRX1	ENSG00000170549	16.2091	35.9354	19.7263	75.54	3.41964	0.0567156	chr2	97000640	97000717	78	-807	NCAPH	ENSG00000121152	66.2846	41.8132	-24.4715	-12.1126	-3.98183	0.0577151
chr5	3187945	3188125	181	-408042	IRX1	ENSG00000170549	30.5718	50.1282	19.5564	31.7953	3.40174	0.0571991	chr2	97165800	97166611	812	-35874	ARID5A	ENSG00000196843	50.2453	20.5723	-29.673	-229.095	-3.01599	0.070612
chr5	3341245	3342233	989	-253934	IRX1	ENSG00000170549	30.4756	51.9356	21.46	75.5001	3.93489	0.0559792	chr2	97308540	97308785	246	-4424	KANSL3	ENSG00000114982	57.5353	41.1452	-16.3901	-18.5316	-3.01149	0.0558294
chr5	7849503	7849806	304	1457	C5orf49	ENSG00000215217	36.0512	56.6192	20.568	22.4536	4.49484	0.0575658	chr2	98281447	98281738	292	-876	ACTR1B	ENSG00000115073	71.4896	49.8161	-21.6735	-14.3017	-3.28935	0.0564073
chr5	10138385	10139187	803	110810	FAM173B	ENSG00000150756	37.6581	54.3178	16.6597	79.5493	3.72951	0.0559792	chr2	100719819	100720050	232	941	AFF3	ENSG00000144218	42.2481	20.9527	-21.2954	-9.89046	-3.08947	0.0677314
chr5	10563178	10563295	118	-1284	ANKRD33B	ENSG00000164236	40.6698	57.4321	16.7623	21.8148	3.18806	0.0607591	chr2	100813538	100813702	165	-54492	AFF3	ENSG00000144218	61.8973	41.8927	-20.0046	-22.0385	-3.03385	0.0644177
chr5	10918850	10919467	618	-157465	DAP	ENSG00000112977	56.0196	77.7979	21.7782	21.355	3.81814	0.0585365	chr2	100814015	100814141	127	-54969	AFF3	ENSG00000144218	53.5816	32.8821	-20.6995	-9.62922	-3.07933	0.0653268
chr5	14405999	14406732	734	-81824	TRIO	ENSG00000038382	37.9599	56.6233	18.6634	75.8579	4.54997	0.0593092	chr2	100937505	100937596	92	1598	LONRF2	ENSG00000170500	59.8389	40.1981	-19.6408	-15.9655	-3.00604	0.0571965
chr5	16492962	16493425	464	15681	FAM134B	ENSG00000154153	49.4617	71.2037	21.7421	31.3529	3.24517	0.0622565	chr2	101360351	101361143	793	-75470	NPAS2	ENSG00000170485	76.9876	57.7465	-19.241	-65.8331	-3.04819	0.0574132
chr5	16666003	16667019	1017	-48835	FAM134B	ENSG00000154153	53.6469	74.333	20.6861	84.2999	3.53267	0.058789	chr2	101434265	101434655	391	-1958	NPAS2	ENSG00000170485	65.2763	34.3187	-30.9576	-33.0862	-4.05289	0.058779
chr5	16702976	16703130	155	35365	MYO10	ENSG00000145555	46.4798	70.9182	24.4385	10.9181	3.69747	0.060776	chr2	101437851	101439327	1477	363	NPAS2	ENSG00000170485	56.0109	18.909	-37.1019	-119.711	-3.04037	0.0693656
chr5	34686818	34687565	748	-98	RAI14	ENSG00000039560	41.3018	62.2415	20.9396	52.988	4.14779	0.0573621	chr2	101451751	101452253	503	14263	NPAS2	ENSG00000170485	83.8807	56.0065	-27.8742	-40.2324	-3.00903	0.0627254
chr5	34804508	34804746	239	-34522	TTC23L	ENSG00000205838	32.0881	53.3201	21.232	9.90402	3.39482	0.0613542	chr2	101574585	101575234	650	-16093	NPAS2	ENSG00000170485	55.0629	27.5247	-27.5382	-68.0382	-3.08046	0.0635676
chr5	37951962	37952973	1012	-112173	GDNF	ENSG00000168621	45.4041	73.3443	27.9402	143.005	4.14781	0.0573716	chr2	101922876	101923079	204	2078	RNF149	ENSG00000163162	77.7224	59.558	-18.1644	-21.7582	-3.03852	0.0536949
chr5	42982214	42982286	73	60985	ANXA2R	ENSG00000177721	26.0528	46.7509	20.6981	19.7424	3.29319	0.0601342	chr2	102229676	102229759	84	-83552	MAP4K4	ENSG00000071054	76.4068	59.2151	-17.1917	-18.0751	-3.00495	0.0575294
chr5	53516116	53517031	916	89371	ARL15	ENSG00000185305	37.1846	65.4367	28.2521	53.6136	4.02399	0.0645443	chr2	102432460	102432794	335	18733	MAP4K4	ENSG00000071054	79.6196	58.9091	-20.7104	-22.0738	-3.07719	0.0543428
chr5	53604641	53604941	301	1461	ARL15	ENSG00000185305	43.0422	64.0544	21.0122	12.0245	4.46481	0.0579331	chr2	103324485	103325173	689	28139	MFSD9	ENSG00000135953	41.019	22.1628	-18.8563	-66.6374	-3.05288	0.0678706
chr5	55786360	55787552	1193	-8763	CTC-236F12.4	ENSG00000248727	27.7437	61.0305	33.2868	66.2003	4.04867	0.0726737	chr2	105975378	105975549	172	21388	C2orf49	ENSG00000135974	71.8177	47.5572	-24.2605	-15.1386	-3.00136	0.0538065
chr5	59061812	59062527	716	1934	PDE4D	ENSG00000113448	29.9279	58.1656	28.2377	39.5799	5.37692	0.0625929	chr2	105981108	105981706	599	27118	C2orf49	ENSG00000135974	83.1363	53.7452	-29.3911	-20.4609	-3.06309	0.0555079
chr5	62077834	62078165	332	203131	LRRC70	ENSG00000186105	43.2034	62.7473	19.5439	25.4413	3.27577	0.0583754	chr2	105997200	105998955	1756	14286	FHL2	ENSG00000115641	87.0841	47.4559	-39.6282	-162.836	-3.24891	0.0549309
chr5	66122791	66123263	473	-1338	MAST4	ENSG00000069020	46.1747	64.0324	17.8577	18.74	3.19024	0.0571678	chr2	106013724	106014145	422	-309	FHL2	ENSG00000115641	62.1439	17.0037	-45.1401	-52.9916	-3.40263	0.0599321
chr5	68711468	68711558	91	258	MARVELD2	ENSG00000152939	33.8794	60.4841	26.6047	21.8314	3.20394	0.0887771	chr2	106072185	106072705	521	-17214	FHL2	ENSG00000115641	58.4132	39.6558	-18.7574	-31.0203	-3.72014	0.0576655
chr5	70797296	70797603	308	45853	BDP1	ENSG00000145734	61.7897	79.0202	17.2305	9.44423	3.26345	0.0568995	chr2	106103439	106104292	854	-48468	FHL2	ENSG00000115641	55.5764	39.9293	-15.6471	-85.2153	-3.00302	0.0652476
chr5	71853138	71853264	127	-49583	ZNF366	ENSG00000178175	28.2624	46.5962	18.3338	31.6496	3.62375	0.0568382	chr2	106471461	106472353	893	3222	NCK2	ENSG00000071051	69.7002	42.4195	-27.2807	-97.3965	-3.05885	0.0596381
chr5	77804845	77805844	1000	39129	LHFPL2	ENSG00000145685	28.7225	59.2561	30.5336	122.038	4.66339	0.0767768	chr2	109253700	109254039	340	15977	LIMS1	ENSG00000169756	47.6926	29.581	-18.1116	-16.8774	-3.05523	0.0553058
chr5	78093963	78094572	610	-149314	LHFPL2	ENSG00000145685	54.1423	74.5155	20.3733	33.5192	3.59534	0.0560667	chr2	109747003	109747423	421	1005	SH3RF3	ENSG00000172985	29.8374	6.13602	-23.7014	-34.0602	-3.18245	0.0557685
chr5	82873050	82873260	211	96102	HAPLN1	ENSG00000145681	53.0224	75.2962	22.2738	9.37896	3.18795	0.0580237	chr2	109901466	109901507	42	155468	SH3RF3	ENSG00000172985	63.888	44.615	-19.273	-15.2648	-3.02409	0.0558537
chr5	98175509	98175889	381	66169	RGMB	ENSG00000174136	35.1615	58.6947	23.5332	44.3121	3.51369	0.0722914	chr2	109901829	109902000	172	155831	SH3RF3	ENSG00000172985	70.057	49.8881	-20.1689	-25.5873	-3.02423	0.0560425
chr5	102089760	102089883	124	74	PAM	ENSG00000145730	42.9146	60.7832	17.8687	22.4404	3.29674	0.0592196	chr2	110088738	110089260	523	-169819	SH3RF3	ENSG00000172985	68.1216	46.1448	-21.9769	-50.6748	-3.0335	0.0722053
chr5	108064645	108064708	64	-18814	FER	ENSG00000151422	49.9467	68.7916	18.8449	16.7619	3.38415	0.0561964	chr2	110094577	110095270	694	-163809	SH3RF3	ENSG00000172985	84.5362	66.2064	-18.3297	-48.4476	-3.02502	0.0552044
chr5	112258552	112258911	360	-315	REEP5	ENSG00000129625	31.6353	54.4926	22.8573	20.6078	4.5559	0.060085	chr2	112124427	112124993	567	243097	BCL2L11	ENSG00000153094	70.3951	46.683	-23.7121	-42.2901	-3.09255	0.0561886
chr5	112378669	112379860	1192	66189	DCP2	ENSG00000172795	39.4341	70.0134	30.5793	127.604	5.6172	0.0570929	chr2	112173853	112174527	675	292523	BCL2L11	ENSG00000153094	49.4155	29.856	-19.5595	-38.8527	-3.03086	0.0566193
chr5	112538252	112540106	1855	30267	MCC	ENSG00000171444	46.1461	82.4128	36.2667	254.323	7.2816	0.0591562	chr2	112429045	112429233	189	185190	ANAPC1	ENSG00000153107	82.6845	64.5148	-18.1697	-19.0172	-3.0028	0.0538162
chr5	112825132	112825266	135	-604	MCC	ENSG00000171444	7.69689	29.0706	21.3737	10.5567	3.69905	0.0598094	chr2	112592883	112593290	408	21133	ANAPC1	ENSG00000153107	82.39	63.3169	-19.0731	-28.6615	-3.07706	0.0555193
chr5	115176214	115176426	213	-751	AP3S1	ENSG00000177879	40.4842	61.6696	21.1854	40.968	4.5567	0.0602815	chr2	112807220	112807676	457	-5123	TMEM87B	ENSG00000153214	71.5039	50.5738	-20.9301	-57.3852	-3.05071	0.054025
chr5	115845817	115846334	518	25789	SEMA6A	ENSG00000092421	52.0744	69.0015	16.9271	9.71182	3.43481	0.0559792	chr2	113470945	113471278	334	-7784	NT5DC4	ENSG00000144130	80.3769	60.2557	-20.1212	-33.6635	-3.01898	0.0550892
chr5	115846767	115847526	760	24597	SEMA6A	ENSG00000092421	52.0815	69.491	17.4095	19.841	3.50617	0.0559792	chr2	114309753	114310009	257	53091	FOXD4L1	ENSG00000184492	56.9278	29.2306	-27.6972	-23.303	-3.73232	0.0655798
chr5	118605785	118606081	297	1335	TNFAIP8	ENSG00000145779	23.554	66.9763	43.4223	28.767	5.3866	0.0750055	chr2	114461189	114461306	118	32126	SLC35F5	ENSG00000115084	52.8431	31.3695	-21.4735	-10.5602	-3.20462	0.0621486
chr5	118793002	118793447	446	4553	HSD17B4	ENSG00000133835	52.608	76.3176	23.7096	17.5733	3.66762	0.0571951	chr2	120302592	120303111	520	530	PCDP1	ENSG00000163075	64.0553	31.9614	-32.0939	-71.4273	-4.00999	0.0567213
chr5	121646202	121646740	539	-308	SNCAIP	ENSG00000064692	33.617	61.4466	27.8296	49.2979	4.36607	0.0733632	chr2	120519119	120520072	954	1318	PTPN4	ENSG00000088179	74.8572	51.7527	-23.1045	-48.23	-3.15966	0.0536658
chr5	126364360	126364790	431	1709	2003-03-01	ENSG00000173926	35.3584	65.4972	30.1388	37.7532	3.97053	0.0690982	chr2	120771973	120772144	172	1185	EPB41L5	ENSG00000115109	60.2807	39.1534	-21.1272	-13.2488	-3.15872	0.0560502
chr5	132576260	132576745	486	188605	HSPA4	ENSG00000170606	41.6495	56.9301	15.2806	27.0468	3.52963	0.0559792	chr2	121303344	121304287	944	-79646	LINC01101	ENSG00000268194	45.7461	17.1865	-28.5596	-138.644	-3.69069	0.0663149
chr5	132613418	132614043	626	225763	HSPA4	ENSG00000170606	42.5014	64.1076	21.6062	40.1179	3.78203	0.0564281	chr2	121372005	121372211	207	-121611	GLI2	ENSG00000074047	46.6237	30.2197	-16.404	-34.8358	-3.02163	0.0649262
chr5	134732943	134732961	19	1939	H2AFY	ENSG00000113648	63.2057	78.3639	15.1582	9.37132	3.14716	0.0576177	chr2	121413737	121414725	989	-79097	GLI2	ENSG00000074047	65.095	44.6098	-20.4852	-102.899	-3.04269	0.0567158
chr5	135329207	135329784	578	-34799	TGFBI	ENSG00000120708	21.4465	37.3689	15.9225	30.671	3.56113	0.058491	chr2	121651364	121651796	433	96442	GLI2	ENSG00000074047	48.7645	26.1614	-22.6031	-39.5429	-3.0329	0.0568507
chr5	136627832	136628531	700	20695	SPOCK1	ENSG00000152377	53.6573	71.6135	17.9562	21.9803	3.23394	0.0559837	chr2	121683843	121683902	60	128921	GLI2	ENSG00000074047	89.236	67.9119	-21.3241	-10.3956	-3.21386	0.053647
chr5	137688038	137688090	53	-194	KDM3B	ENSG00000120733	32.5648	59.0795	26.5146	10.8167	3.88656	0.0588214	chr2	121684247	121684467	221	129325	GLI2	ENSG00000074047	85.0412	62.2184	-22.8228	-37.3307	-3.04062	0.053647
chr5	138263727	138263876	150	-2450	CTNNA1	ENSG00000044115	60.9292	78.7631	17.8339	15.3509	3.09256	0.0559792	chr2	122367387	122367431	45	39620	CLASP1	ENSG00000074054	93.2541	75.458	-17.7962	-9.02383	-3.00383	0.05346
chr5	139581581	139582156	576	27353	CYSTM1	ENSG00000120306	47.3638	67.8124	20.4486	27.6068	3.14025	0.0649368	chr2	122480440	122481073	634	7445	NIFK	ENSG00000155438	68.83	44.8405	-23.9895	-42.2281	-3.13	0.05346
chr5	140098308	140098578	271	18388	ZMAT2	ENSG00000146007	35.0192	60.9425	25.9233	32.4531	3.40463	0.0768391	chr2	122530032	122530692	661	16284	TSN	ENSG00000211460	67.184	48.9214	-18.2626	-50.3767	-3.18119	0.0536359
chr5	141052869	141053017	149	-141	ARAP3	ENSG00000120318	64.3552	81.9038	17.5486	9.71797	3.39209	0.0559792	chr2	127426999	127427776	778	13238	GYPC	ENSG00000136732	76.7314	56.3793	-20.3521	-65.3151	-3.05769	0.05346
chr5	141060549	141060750	202	-150	ARAP3	ENSG00000120318	41.2545	62.8942	21.6397	22.7043	3.98124	0.0571683	chr2	127955366	127955790	425	7552	CYP27C1	ENSG00000186684	76.8567	56.1319	-20.7248	-41.1177	-3.01414	0.0536404
chr5	141412334	141413058	725	-19727	GNPDA1	ENSG00000113552	37.4508	59.6336	22.1829	62.5386	3.39251	0.0560039	chr2	128050755	128050918	164	751	ERCC3	ENSG00000163161	58.6895	38.1721	-20.5175	-23.0519	-3.02767	0.0536611
chr5	145579071	145579620	550	-3492	RBM27	ENSG00000091009	30.2516	66.1334	35.8818	77.931	6.13868	0.0564885	chr2	128431929	128432169	241	-45	LIMS2	ENSG00000072163	72.0015	50.4198	-21.5817	-18.7477	-3.33138	0.0570478
chr5	145826233	145826330	98	-544	TCERG1	ENSG00000113649	55.5203	79.2699	23.7496	16.3142	5.02659	0.0562054	chr2	129138662	129139197	536	-62510	HS6ST1	ENSG00000136720	52.9677	34.4757	-18.492	-43.6294	-3.14527	0.065667
chr5	146779730	146780395	666	769	DPYSL3	ENSG00000113657	56.9069	77.9905	21.0836	30.6819	4.0814	0.0567542	chr2	129166326	129166426	101	-90174	HS6ST1	ENSG00000136720	59.1737	45.0859	-14.0878	-24.4253	-3.02621	0.0536233
chr5	148521916	148522382	467	305	ABLIM3	ENSG00000173210	38.9997	64.9281	25.9284	29.3198	4.7076	0.0666847	chr2	130947179	130947235	57	-6855	SMPD4	ENSG00000136699	74.4879	56.548	-17.9399	-12.3654	-3.08209	0.0566662
chr5	148555133	148555531	399	33522	ABLIM3	ENSG00000173210	28.0797	48.397	20.3173	36.7142	4.00562	0.0569868	chr2	131449623	131449740	118	-36902	GPR148	ENSG00000173302	71.9553	30.0306	-41.9247	-22.6178	-4.29815	0.0849364
chr5	149998127	149998630	504	920	SYNPO	ENSG00000171992	22.451	45.7384	23.2874	36.2871	3.47209	0.0570321	chr2	131797266	131798157	892	-692	ARHGEF4	ENSG00000136002	71.6476	31.8824	-39.7652	-512.114	-3.09834	0.0688779
chr5	150409827	150410290	464	3299	GPX3	ENSG00000211445	49.4683	66.2839	16.8155	19.7329	3.46332	0.0559792	chr2	133428917	133429299	383	0	LYPD1	ENSG00000150551	28.5814	6.96793	-21.6134	-34.8146	-3.00395	0.0545941
chr5	153576811	153577021	211	6476	GALNT10	ENSG00000164574	42.9165	65.9166	23	12.8051	3.42961	0.0615009	chr2	133855013	133856126	1114	-18450	AC011755.1	ENSG00000269686	72.5424	54.2435	-18.2989	-43.0706	-3.214	0.05346
chr5	153786779	153786832	54	3183	GALNT10	ENSG00000164574	68.4241	91.5378	23.1138	9.472	3.19532	0.0560336	chr2	134324683	134325046	364	984	NCKAP5	ENSG00000176771	44.7889	26.8671	-17.9218	-26.9027	-3.02533	0.0553653
chr5	155755648	155756159	512	1880	SGCD	ENSG00000170624	32.7103	55.8149	23.1047	30.0663	3.99388	0.0617227	chr2	135203906	135203962	57	192075	MGAT5	ENSG00000152127	73.529	52.1878	-21.3413	-12.6496	-3.10262	0.0601627
chr5	156962298	156962414	117	-32467	ADAM19	ENSG00000135074	47.473	64.1298	16.6568	10.5226	3.72645	0.0570539	chr2	135204303	135204653	351	192472	MGAT5	ENSG00000152127	74.4319	51.3216	-23.1103	-31.1027	-3.13127	0.0601627
chr5	159491971	159492309	339	21830	TTC1	ENSG00000113312	36.7562	55.4877	18.7314	19.2135	3.23041	0.059598	chr2	136877557	136877804	248	-1821	CXCR4	ENSG00000121966	31.4228	11.0972	-20.3257	-19.9149	-3.0185	0.0640781
chr5	159616123	159616317	195	1748	FABP6	ENSG00000170231	34.0516	55.0346	20.983	13.2812	3.59293	0.0589233	chr2	142890058	142890104	47	-787	LRP1B	ENSG00000168702	59.2012	34.8528	-24.3484	-12.4661	-3.02485	0.0737034
chr5	167449238	167449804	567	146247	TENM2	ENSG00000145934	21.7037	51.1056	29.4019	32.8013	3.43102	0.0627424	chr2	149403991	149404194	204	1001	EPC2	ENSG00000135999	52.7541	27.7011	-25.053	-19.1915	-4.4249	0.0547237
chr5	168728833	168728965	133	-699	SLIT3	ENSG00000184347	38.8081	59.2589	20.4509	15.1855	3.0678	0.0604089	chr2	151395260	151395686	427	0	RND3	ENSG00000115963	59.3433	38.6999	-20.6434	-26.6955	-3.68946	0.055258
chr5	169009890	169010070	181	-567	SPDL1	ENSG00000040275	5.61902	27.6318	22.0128	12.4138	5.7308	0.0585598	chr2	153572350	153572581	232	1305	PRPF40A	ENSG00000196504	57.9046	35.7178	-22.1868	-13.8497	-3.30191	0.0542644
chr5	171591485	171592062	578	23327	STK10	ENSG00000072786	48.6732	75.0074	26.3342	57.906	3.82269	0.065335	chr2	157176038	157176637	600	9995	NR4A2	ENSG00000153234	42.6423	15.1596	-27.4826	-168.185	-3.01649	0.0715071
chr5	171594609	171595427	819	19962	STK10	ENSG00000072786	48.1846	74.6223	26.4377	71.904	4.24401	0.0616838	chr2	160144681	160144764	84	-1370	WDSUB1	ENSG00000196151	74.3062	55.0547	-19.2515	-9.63873	-3.14434	0.0578776
chr5	172177396	172177886	491	20311	DUSP1	ENSG00000120129	38.8815	60.6313	21.7498	32.8166	3.48288	0.0610616	chr2	160473900	160474347	448	-696	BAZ2B	ENSG00000123636	51.3049	23.9266	-27.3783	-30.9904	-3.66412	0.0576693
chr5	172469076	172469421	346	-13933	CREBRF	ENSG00000164463	35.212	60.6577	25.4456	26.5602	5.42043	0.0611145	chr2	160655370	160655439	70	-616	CD302	ENSG00000241399	69.1525	49.2714	-19.881	-13.8888	-3.35301	0.0570705
chr5	172727569	172727804	236	25995	STC2	ENSG00000113739	53.1229	70.2509	17.128	15.7276	3.25076	0.0579706	chr2	160919786	160919874	89	-664	PLA2R1	ENSG00000153246	40.2083	19.5513	-20.657	-10.9538	-3.30656	0.0605418
chr5	175378325	175378395	71	9724	THOC3	ENSG00000051596	50.4617	72.1943	21.7326	9.14056	3.05179	0.0648315	chr2	161245166	161246077	912	18322	RBMS1	ENSG00000153250	53.7775	28.9244	-24.8531	-43.7662	-3.05919	0.053771
chr5	176802672	176803307	636	-2928	SLC34A1	ENSG00000131183	47.9787	67.8047	19.826	48.497	3.65982	0.0566135	chr2	161261724	161262089	366	2310	RBMS1	ENSG00000153250	50.1715	29.7089	-20.4626	-13.7723	-3.22763	0.0536901
chr5	177711089	177711267	179	-51302	PHYKPL	ENSG00000175309	30.6059	52.3467	21.7408	13.2136	3.37049	0.0682467	chr2	162093967	162094118	152	6269	TANK	ENSG00000136560	42.9646	23.6135	-19.351	-37.6508	-3.10276	0.0569491
chr5	177711686	177712259	574	-51899	PHYKPL	ENSG00000175309	31.8506	56.7508	24.9003	34.9219	3.98746	0.0658258	chr2	162197502	162197733	232	32390	PSMD14	ENSG00000115233	63.3758	37.7291	-25.6466	-31.8996	-3.06883	0.0814492
chr5	177810870	177811667	798	-151083	PHYKPL	ENSG00000175309	14.1442	56.4264	42.2822	172.687	4.73107	0.0911354	chr2	163174300	163174544	245	649	IFIH1	ENSG00000115267	61.593	41.985	-19.608	-25.6862	-3.05783	0.0629205
chr5	177954175	177955332	1158	33906	COL23A1	ENSG00000050767	18.5936	43.9101	25.3165	108.221	5.17662	0.058712	chr2	164205764	164205964	201	386552	FIGN	ENSG00000182263	74.0876	58.294	-15.7935	-15.5492	-3.02488	0.0571823
chr5	177962254	177962668	415	26570	COL23A1	ENSG00000050767	40.3351	63.5658	23.2306	40.2192	3.52203	0.0681824	chr2	164589300	164590850	1551	1666	FIGN	ENSG00000182263	68.8371	24.1999	-44.6371	-93.4494	-3.07872	0.115518
chr6	518051	518353	303	126311	IRF4	ENSG00000137265	37.1993	56.6734	19.4741	24.4238	3.68723	0.0586854	chr2	165696688	165697211	524	519	COBLL1	ENSG00000082438	37.9067	14.9468	-22.9599	-49.2574	-3.0521	0.0675777
chr6	649479	649700	222	7262	HUS1B	ENSG00000188996	50.7325	68.7393	18.0068	15.3699	4.27908	0.0539268	chr2	166466535	166467530	996	35915	CSRNP3	ENSG00000178662	60.1297	43.6917	-16.438	-38.8461	-3.02141	0.0569599
chr6	650263	650576	314	6386	HUS1B	ENSG00000188996	49.4232	72.2182	22.795	27.9725	5.09571	0.0549847	chr2	168974597	168974739	143	129911	STK39	ENSG00000198648	75.3082	54.0962	-21.212	-15.5594	-3.00568	0.0549901
chr6	737344	737502	159	-44226	EXOC2	ENSG00000112685	53.614	70.8531	17.2391	13.0444	3.32066	0.0564065	chr2	168975235	168975757	523	128893	STK39	ENSG00000198648	69.4712	47.2738	-22.1974	-26.2433	-3.0803	0.0549901
chr6	793317	793747	431	-100199	EXOC2	ENSG00000112685	27.1278	43.0773	15.9496	62.0338	3.38623	0.0578526	chr2	168994403	168994653	251	109997	STK39	ENSG00000198648	89.3251	67.4358	-21.8892	-9.61534	-3.11423	0.0541128
chr6	1070045	1070136	92	-10027	AL033381.1	ENSG00000176515	27.9417	49.0948	21.1531	12.1459	3.03879	0.0930348	chr2	168994983	168995348	366	109302	STK39	ENSG00000198648	90.3622	67.9773	-22.3849	-19.7307	-3.00172	0.0541128
chr6	1145589	1145964	376	65424	AL033381.1	ENSG00000176515	29.4687	43.2372	13.7685	18.8516	3.23035	0.0694238	chr2	169013006	169014128	1123	90522	STK39	ENSG00000198648	67.6059	42.5597	-25.0463	-61.1158	-3.06349	0.0539428
chr6	1170883	1171067	185	90718	AL033381.1	ENSG00000176515	31.7489	43.1728	11.424	24.3749	3.07569	0.0614272	chr2	169386493	169387427	935	73733	CERS6	ENSG00000172292	81.9598	58.6989	-23.261	-34.1158	-3.20832	0.0579853
chr6	1325084	1325407	324	12408	FOXQ1	ENSG00000164379	38.4604	59.2874	20.827	32.7076	4.01132	0.0657489	chr2	170335553	170335647	95	-40	BBS5	ENSG00000163093	66.2722	48.9431	-17.3291	-9.7063	-3.10367	0.05346
chr6	1325784	1326215	432	13108	FOXQ1	ENSG00000164379	25.1328	52.1867	27.0539	26.6682	4.52554	0.0674407	chr2	170593046	170593559	514	983	KLHL23	ENSG00000213160	78.3811	51.2283	-27.1528	-26.8121	-3.12374	0.0668809
chr6	1326684	1326919	236	14008	FOXQ1	ENSG00000164379	34.6207	54.0062	19.3855	22.5357	3.61867	0.0689125	chr2	171007176	171007861	686	-26793	MYO3B	ENSG00000071909	75.7616	50.1769	-25.5846	-50.4741	-3.23427	0.0568779
chr6	1334842	1335278	437	22166	FOXQ1	ENSG00000164379	38.0642	60.8454	22.7812	51.4183	4.56952	0.0674848	chr2	172291570	172291683	114	-279	METTL8	ENSG00000123600	67.6502	47.0797	-20.5705	-10.7039	-3.04516	0.0554557
chr6	1335620	1336426	807	22944	FOXQ1	ENSG00000164379	45.2849	65.2429	19.958	65.245	4.46372	0.0642361	chr2	172751428	172751537	110	-665	SLC25A12	ENSG00000115840	58.7505	40.4155	-18.335	-10.5764	-3.28112	0.0538206
chr6	1387821	1388708	888	-1360	FOXF2	ENSG00000137273	20.8384	60.5831	39.7447	94.6541	4.0643	0.093484	chr2	172863738	172864205	468	-284	METAP1D	ENSG00000172878	64.1414	39.0604	-25.081	-39.3691	-3.01247	0.0552543
chr6	1394384	1395378	995	4314	FOXF2	ENSG00000137273	18.3704	64.6899	46.3195	101.099	3.39649	0.11584	chr2	172886611	172886649	39	22120	METAP1D	ENSG00000172878	45.217	26.2701	-18.9468	-9.14238	-3.01329	0.0542391
chr6	1577593	1578687	1095	-31993	FOXC1	ENSG00000054598	38.292	78.037	39.745	143.411	5.16119	0.0863985	chr2	172886993	172887598	606	22502	METAP1D	ENSG00000172878	51.3004	29.7421	-21.5583	-24.7255	-3.15969	0.0542391
chr6	1601022	1601754	733	-8926	FOXC1	ENSG00000054598	42.0846	79.5679	37.4834	131.207	4.77436	0.0909405	chr2	173419705	173419874	170	-226	PDK1	ENSG00000152256	55.8777	37.4645	-18.4133	-23.9533	-3.16904	0.0542228
chr6	1899619	1900418	800	275806	GMDS	ENSG00000112699	52.8647	77.4594	24.5947	69.1281	3.68845	0.0705525	chr2	173458560	173459276	717	37266	PDK1	ENSG00000152256	75.2228	46.6443	-28.5784	-62.4137	-4.25651	0.05346
chr6	2509745	2510637	893	124199	C6orf195	ENSG00000164385	13.4041	35.8043	22.4002	111.204	4.03047	0.0653557	chr2	174732660	174732715	56	96231	SP3	ENSG00000172845	48.052	26.9373	-21.1147	-9.52492	-3.12531	0.0610702
chr6	2950019	2950210	192	11350	SERPINB6	ENSG00000124570	53.3701	70.2	16.8299	12.4481	3.18276	0.0551968	chr2	174733021	174733685	665	95261	SP3	ENSG00000172845	50.8335	26.9202	-23.9133	-18.2714	-3.55359	0.0606889
chr6	3061922	3062010	89	-6647	RIPK1	ENSG00000137275	69.2921	87.6339	18.3418	13.9724	3.52826	0.0567518	chr2	175655799	175656122	324	-26598	CHRNA1	ENSG00000138435	82.9542	64.3489	-18.6053	-21.5142	-3.0069	0.0541622
chr6	3229867	3230421	555	-1619	PSMG4	ENSG00000180822	7.96766	31.2642	23.2966	104.948	4.35372	0.0555897	chr2	176045104	176045265	162	1125	ATP5G3	ENSG00000154518	67.4479	48.923	-18.5249	-13.3841	-3.0387	0.0539003
chr6	3318062	3318394	333	58767	PSMG4	ENSG00000180822	46.914	68.5247	21.6107	28.0489	3.20403	0.0586026	chr2	176933323	176933407	85	15233	EVX2	ENSG00000174279	73.3675	42.3857	-30.9818	-39.7332	-3.02309	0.0815013
chr6	7106477	7106836	360	-993	RREB1	ENSG00000124782	35.1531	57.3024	22.1493	23.3313	4.34508	0.0542602	chr2	176956346	176956899	554	-719	HOXD13	ENSG00000128714	84.0686	66.0164	-18.0521	-125.56	-3.02565	0.0569197
chr6	7891458	7891967	510	18342	TXNDC5	ENSG00000239264	57.5639	78.4131	20.8492	46.244	3.83614	0.0555765	chr2	176976210	176976772	563	4195	HOXD11	ENSG00000128713	72.1002	51.3151	-20.7851	-55.1345	-3.00855	0.0628057
chr6	7899731	7900516	786	9793	TXNDC5	ENSG00000239264	62.8453	82.304	19.4587	30.8907	3.59756	0.053819	chr2	177135023	177135118	96	792	MTX2	ENSG00000128654	69.5125	51.2946	-18.2178	-25.5543	-3.02638	0.0636614
chr6	10749912	10750017	106	1847	TMEM14B	ENSG00000137210	68.0347	88.5363	20.5016	10.5022	3.52737	0.0582565	chr2	177355034	177355417	384	220803	MTX2	ENSG00000128654	48.5851	34.3053	-14.2798	-109.993	-3.12145	0.0624183
chr6	10750529	10750619	91	2464	TMEM14B	ENSG00000137210	70.8806	90.2915	19.4109	16.5244	3.35967	0.0582565	chr2	178482967	178483089	123	604	TTC30A	ENSG00000197557	51.4727	36.5006	-14.972	-19.4821	-3.06579	0.05346
chr6	11213987	11214942	956	17948	NEDD9	ENSG00000111859	60.8838	79.8892	19.0054	49.8149	3.62815	0.0537969	chr2	179142446	179142620	175	-7033	OSBPL6	ENSG00000079156	70.1166	48.3003	-21.8163	-12.2704	-3.0184	0.0542572
chr6	11269896	11271460	1565	-36980	NEDD9	ENSG00000111859	49.2557	71.3528	22.0971	70.7612	3.77187	0.0560385	chr2	182755339	182755638	300	-976	SSFA2	ENSG00000138434	68.9085	33.7324	-35.1761	-23.4219	-5.22321	0.0586248
chr6	13015145	13015403	259	-38285	PHACTR1	ENSG00000112137	28.4798	44.6756	16.1958	39.9264	3.46428	0.0537923	chr2	182759223	182759555	333	2299	SSFA2	ENSG00000138434	72.5621	45.662	-26.9001	-15.2059	-3.16784	0.0635931
chr6	13395160	13396094	935	12274	GFOD1	ENSG00000145990	52.446	71.4708	19.0247	29.6265	3.63181	0.0558402	chr2	183581978	183582338	361	-455	DNAJC10	ENSG00000077232	57.6393	34.3536	-23.2857	-16.1617	-3.24396	0.0566992
chr6	14785034	14785321	288	-461205	JARID2	ENSG00000008083	35.5659	67.2401	31.6742	57.3558	4.60195	0.063677	chr2	187453832	187454028	197	-763	ITGAV	ENSG00000138448	41.9343	21.5462	-20.3881	-24.4405	-3.58605	0.0545953
chr6	26127144	26127497	354	2712	HIST1H2AC	ENSG00000180573	31.9582	55.9078	23.9496	12.1794	4.41609	0.0539304	chr2	187558319	187558355	37	-342	FAM171B	ENSG00000144369	63.5954	41.7585	-21.8368	-11.9824	-3.67616	0.056061
chr6	26284179	26284256	78	1480	HIST1H4H	ENSG00000158406	36.171	52.053	15.882	18.87	3.19615	0.0539536	chr2	187867878	187868349	472	-153980	ZSWIM2	ENSG00000163012	81.97	65.7472	-16.2228	-123.217	-3.02049	0.0606391
chr6	26556017	26556137	121	17383	HMGN4	ENSG00000182952	26.5061	44.7622	18.2561	12.5604	3.19497	0.0570305	chr2	189806269	189806395	127	-32650	COL3A1	ENSG00000168542	70.4099	51.0637	-19.3463	-13.0519	-3.11511	0.0535028
chr6	27182186	27182256	71	-33223	PRSS16	ENSG00000112812	18.3109	38.7349	20.424	15.4071	3.13558	0.0696785	chr2	190202098	190202207	110	-103951	WDR75	ENSG00000115368	53.4762	31.6302	-21.846	-43.1569	-3.28547	0.0579533
chr6	27534822	27535146	325	-93924	ZNF184	ENSG00000096654	42.3766	62.2434	19.8669	45.7458	4.33005	0.0580717	chr2	190537700	190538183	484	-2527	ANKAR	ENSG00000151687	84.8966	59.144	-25.7526	-18.5716	-3.13967	0.0607768
chr6	30037937	30038254	318	1953	PPP1R11	ENSG00000204619	74.1114	89.4257	15.3142	16.3986	3.40008	0.0542011	chr2	190687894	190688351	458	5040	PMS1	ENSG00000064933	52.8492	34.0656	-18.7836	-12.6055	-3.07701	0.0544153
chr6	31683051	31683702	652	0	LY6G6D	ENSG00000244355	26.3772	46.4946	20.1174	61.9194	4.29011	0.0553657	chr2	190984777	190985308	532	-17177	C2orf88	ENSG00000187699	59.1982	36.2175	-22.9808	-44.737	-3.12249	0.0654869
chr6	31764162	31764227	66	-431	VARS	ENSG00000204394	46.981	63.3035	16.3224	9.57408	3.26415	0.0548075	chr2	191209380	191209452	73	-460	HIBCH	ENSG00000198130	48.0981	20.7802	-27.3179	-17.937	-3.98724	0.053921
chr6	33587403	33587496	94	-645	ITPR3	ENSG00000096433	44.4795	63.2253	18.7458	10.5299	3.99665	0.0537923	chr2	191515540	191515760	221	1543	NAB1	ENSG00000138386	67.287	40.5452	-26.7418	-11.3253	-3.62584	0.0604952
chr6	33662188	33662587	400	886	SBP1	ENSG00000269490	28.8211	55.2167	26.3956	59.6299	3.67037	0.0760803	chr2	191747443	191747724	282	1882	GLS	ENSG00000115419	39.6817	12.3659	-27.3158	-20.7443	-3.78956	0.0589125
chr6	35352628	35352899	272	42225	PPARD	ENSG00000112033	32.3451	61.9452	29.6001	76.6142	3.60678	0.0692527	chr2	192067508	192067742	235	-42168	MYO1B	ENSG00000128641	53.95	35.5007	-18.4493	-14.9073	-3.71153	0.0537101
chr6	36269226	36269322	97	30988	PNPLA1	ENSG00000180316	30.1909	50.3375	20.1466	9.06376	3.03164	0.0634482	chr2	192068079	192068304	226	-41606	MYO1B	ENSG00000128641	55.0527	38.2967	-16.7561	-10.1582	-3.20278	0.0546984
chr6	36308167	36308242	76	-3504	C6orf222	ENSG00000189325	34.6921	52.2563	17.5642	18.8672	3.17741	0.0543772	chr2	192330562	192330799	238	54770	MYO1B	ENSG00000128641	85.0032	66.5776	-18.4256	-9.74375	-3.10395	0.0567105
chr6	36318536	36319163	628	-13873	C6orf222	ENSG00000189325	47.7367	65.6194	17.8827	57.542	3.9977	0.0542187	chr2	193058020	193058443	424	806	TMEFF2	ENSG00000144339	50.3761	27.7549	-22.6212	-61.1443	-3.24815	0.072267
chr6	36634561	36635057	497	-10530	CDKN1A	ENSG00000124762	40.5733	61.9686	21.3953	16.0302	3.51984	0.0610597	chr2	195043053	195043547	495	-1397153	SLC39A10	ENSG00000196950	63.0346	40.5883	-22.4463	-44.0874	-3.11911	0.0578294
chr6	37098949	37099091	143	-38887	PIM1	ENSG00000137193	35.0168	56.957	21.9402	21.3477	3.08427	0.0591862	chr2	197789516	197790012	497	1441	PGAP1	ENSG00000197121	57.1271	26.3317	-30.7954	-30.7929	-4.34557	0.0592026
chr6	37667310	37667518	209	-227	MDGA1	ENSG00000112139	54.5986	74.1687	19.57	40.3551	3.49082	0.0595129	chr2	197792757	197793063	307	-237	PGAP1	ENSG00000197121	61.4176	36.2001	-25.2175	-32.5798	-3.06618	0.0541284
chr6	38323682	38323957	276	238126	BTBD9	ENSG00000183826	39.6415	57.4253	17.7838	9.86409	3.49599	0.0537923	chr2	198670609	198671145	537	1182	PLCL1	ENSG00000115896	32.3041	8.29229	-24.0118	-42.698	-3.50689	0.058688
chr6	41341883	41342721	839	38293	NCR2	ENSG00000096264	19.4749	56.0484	36.5735	232.873	4.37746	0.0838386	chr2	201037753	201038379	627	-132224	SPATS2L	ENSG00000196141	41.1724	22.5899	-18.5825	-37.2163	-3.02248	0.0622636
chr6	41584326	41584368	43	-20251	MDFI	ENSG00000112559	49.2948	70.8234	21.5286	15.9929	3.20475	0.062542	chr2	201982439	201982940	502	-273	CFLAR	ENSG00000003402	53.5431	20.6045	-32.9386	-98.7002	-3.28947	0.0548372
chr6	41860814	41861344	531	553	USP49	ENSG00000164663	34.7753	55.8544	21.0791	19.7485	3.47629	0.0581017	chr2	202317486	202318145	660	966	STRADB	ENSG00000082146	55.65	24.8254	-30.8246	-50.6118	-3.09906	0.0536004
chr6	41907087	41907252	166	1211	CCND3	ENSG00000112576	29.2331	50.3742	21.1411	15.6083	3.15116	0.0579263	chr2	202895529	202895552	24	-3757	FZD7	ENSG00000155760	62.6669	43.8358	-18.8311	-9.40425	-3.06574	0.0655061
chr6	41907514	41907781	268	682	CCND3	ENSG00000112576	21.8154	43.4908	21.6754	9.62453	3.37446	0.0579263	chr2	205427169	205428052	884	16445	PARD3B	ENSG00000116117	84.432	62.8787	-21.5533	-44.239	-3.25327	0.0578315
chr6	42019208	42019228	21	545	TAF8	ENSG00000137413	24.7164	41.5209	16.8045	9.5202	3.17971	0.0578403	chr2	207069438	207069562	125	8532	GPR1	ENSG00000183671	79.7147	61.3493	-18.3654	-9.7308	-3.05756	0.0547253
chr6	42108749	42109710	962	471	C6orf132	ENSG00000188112	36.6172	60.665	24.0478	75.5439	5.94849	0.0581737	chr2	207631061	207631381	321	730	FASTKD2	ENSG00000118246	73.2058	50.5824	-22.6234	-16.4276	-3.14766	0.0573319
chr6	42422219	42422626	408	-2429	TRERF1	ENSG00000124496	30.6404	52.635	21.9946	59.9902	4.90621	0.0537923	chr2	208488637	208488812	176	291	METTL21A	ENSG00000144401	53.5711	32.6119	-20.9592	-16.1636	-3.24286	0.0535545
chr6	42533401	42533702	302	1600	UBR2	ENSG00000024048	41.4707	60.7898	19.3191	32.6109	3.96284	0.0588132	chr2	208890645	208890970	326	-360	PLEKHM3	ENSG00000178385	67.4673	46.4769	-20.9905	-40.4967	-3.2054	0.0539798
chr6	42869813	42870854	1042	-11258	C6orf226	ENSG00000221821	31.966	66.1475	34.1815	108.962	5.61795	0.0683956	chr2	209223579	209223710	132	-47845	PTH2R	ENSG00000144407	73.6606	53.3272	-20.3334	-9.67787	-3.17518	0.0557525
chr6	43045360	43045686	327	807	PTK7	ENSG00000112655	32.7419	53.8199	21.078	17.1508	3.6739	0.0566923	chr2	210287844	210288131	288	-650	MAP2	ENSG00000078018	67.6094	43.3927	-24.2167	-10.0926	-3.02429	0.0623977
chr6	43060799	43060985	187	16246	PTK7	ENSG00000112655	39.5489	61.5675	22.0186	9.54753	3.32723	0.0585019	chr2	213400883	213401195	313	2057	ERBB4	ENSG00000178568	42.4564	23.0489	-19.4075	-31.7578	-3.05503	0.0672781
chr6	43097105	43097250	146	-1078	PTK7	ENSG00000112655	42.7152	68.0348	25.3195	9.3363	3.11541	0.0722128	chr2	213404236	213404384	149	-670	ERBB4	ENSG00000178568	49.4095	32.1899	-17.2196	-25.0362	-3.34211	0.0576987
chr6	43685152	43685512	361	-29623	MRPS18A	ENSG00000096080	46.917	65.8417	18.9246	24.8046	3.12932	0.0587486	chr2	217500323	217502445	2123	2204	IGFBP2	ENSG00000115457	48.9576	10.1064	-38.8512	-362.79	-3.04971	0.0547387
chr6	43775311	43775493	183	33220	VEGFA	ENSG00000112715	52.7904	74.6705	21.8801	9.11774	3.05354	0.0564298	chr2	217578997	217580227	1231	-18748	IGFBP5	ENSG00000115461	76.0243	56.8566	-19.1678	-40.6866	-3.03814	0.0556469
chr6	49223596	49224350	755	206553	MUT	ENSG00000146085	48.6787	66.1418	17.4631	59.4847	4.11066	0.0554013	chr2	218578855	218579991	1137	41286	DIRC3	ENSG00000231672	65.4969	38.2605	-27.2364	-78.7688	-3.03871	0.0581799
chr6	55736192	55736459	268	3217	BMP5	ENSG00000112175	22.8655	70.1812	47.3157	11.6992	3.97608	0.0668613	chr2	218821788	218822047	260	-12936	TNS1	ENSG00000079308	74.8787	48.0843	-26.7944	-31.5813	-3.06852	0.0601672
chr6	55737497	55737884	388	1792	BMP5	ENSG00000112175	23.0834	71.5476	48.4642	16.4885	4.16404	0.0668613	chr2	218830862	218831403	542	12253	TNS1	ENSG00000079308	68.1044	42.6607	-25.4437	-49.5833	-3.13975	0.0547607
chr6	55739268	55739533	266	143	BMP5	ENSG00000112175	32.2531	74.0065	41.7534	29.0019	3.33048	0.0668613	chr2	219188938	219189159	222	1041	PNKD	ENSG00000127838	62.1679	42.578	-19.5899	-16.7088	-3.11184	0.0620271
chr6	57177480	57177765	286	-4656	PRIM2	ENSG00000146143	52.8529	77.6321	24.7792	13.248	5.44378	0.056176	chr2	219756823	219757102	280	9939	WNT10A	ENSG00000135925	42.6469	22.0174	-20.6295	-22.3061	-3.04579	0.060811
chr6	78171684	78171941	258	1548	HTR1B	ENSG00000135312	36.0151	56.868	20.8529	29.5074	3.42645	0.0590593	chr2	220158982	220159088	107	1974	PTPRN	ENSG00000054356	58.1048	36.3909	-21.714	-12.5547	-3.08004	0.0580807
chr6	89674256	89674309	54	9	AL079342.1	ENSG00000203863	24.3236	48.7607	24.4371	14.1912	3.63229	0.0620806	chr2	220461549	220461797	249	-784	STK11IP	ENSG00000144589	69.5721	50.3497	-19.2225	-11.4483	-3.0748	0.0540515
chr6	91007563	91007923	361	-935	BACH2	ENSG00000112182	54.3688	72.0049	17.6361	24.6802	3.12616	0.0542595	chr2	222434044	222434778	735	0	EPHA4	ENSG00000116106	58.209	18.8828	-39.3262	-112.099	-3.35174	0.075977
chr6	92840032	92840396	365	1288847	EPHA7	ENSG00000135333	35.0071	55.3578	20.3507	13.7838	3.51277	0.0565946	chr2	223608964	223609388	425	72458	MOGAT1	ENSG00000124003	51.9	30.0638	-21.8362	-53.1187	-3.01967	0.0695365
chr6	94124369	94125206	838	4037	EPHA7	ENSG00000135333	30.8841	58.4754	27.5912	19.0411	3.93353	0.0624964	chr2	223917460	223918295	836	597	KCNE4	ENSG00000152049	66.17	13.368	-52.802	-223.037	-3.02769	0.0890225
chr6	96024313	96024528	216	-890	MANEA	ENSG00000172469	12.4003	33.4716	21.0712	20.5411	4.37089	0.057542	chr2	223920391	223922707	2317	3528	KCNE4	ENSG00000152049	66.1517	30.4596	-35.6921	-108.756	-3.05021	0.0699334
chr6	100068178	100068487	310	13571	PRDM13	ENSG00000112238	23.3875	44.8619	21.4744	9.59047	3.30386	0.0566653	chr2	224680584	224681006	423	21194	AP1S3	ENSG00000152056	61.6135	39.9566	-21.6569	-26.7091	-3.12133	0.0549864
chr6	106547090	106547748	659	274	PRDM1	ENSG00000057657	24.3221	47.5677	23.2457	43.6423	3.95619	0.0601508	chr2	225803440	225803953	514	7828	DOCK10	ENSG00000135905	78.7652	56.6667	-22.0986	-21.9978	-3.09301	0.0612542
chr6	108613446	108613757	312	-2340	LACE1	ENSG00000135537	42.0688	62.6332	20.5644	14.4417	3.71795	0.0544294	chr2	225822881	225823089	209	-11098	DOCK10	ENSG00000135905	69.9479	50.3165	-19.6314	-18.6875	-3.46112	0.0535669
chr6	108812619	108813237	619	-67800	FOXO3	ENSG00000118689	43.8198	66.9789	23.1591	14.9324	3.84262	0.0615486	chr2	225823437	225824123	687	-11654	DOCK10	ENSG00000135905	72.9314	50.6016	-22.3298	-33.792	-4.01989	0.0535669
chr6	109018963	109019209	247	41413	FOXO3	ENSG00000118689	66.0201	82.9169	16.8968	27.3288	3.06343	0.0538613	chr2	225824472	225824501	30	-12689	DOCK10	ENSG00000135905	82.9762	64.4208	-18.5554	-10.4768	-3.4724	0.0535669
chr6	109272571	109273042	472	57148	SESN1	ENSG00000080546	63.1881	83.1924	20.0043	48.19	3.31011	0.0561296	chr2	225847532	225848346	815	-35749	DOCK10	ENSG00000135905	61.1131	36.7452	-24.3679	-43.8379	-3.00221	0.0672189
chr6	109760582	109760831	250	875	PPIL6	ENSG00000185250	22.5266	46.1946	23.668	59.3017	4.55269	0.0564111	chr2	230892344	230892501	158	40503	SLC16A14	ENSG00000163053	80.8205	58.344	-22.4765	-24.7993	-3.00509	0.07221
chr6	117842502	117844049	1548	38676	DCBLD1	ENSG00000164465	55.1336	79.9446	24.811	57.1913	4.85592	0.0546581	chr2	232127605	232128167	563	3922	ARMC9	ENSG00000135931	66.7244	41.1026	-25.6219	-39.0971	-3.04422	0.0663334
chr6	126123796	126124428	633	-6852	NCOA7	ENSG00000111912	53.8435	71.5421	17.6986	21.2905	3.75236	0.0547255	chr2	232259623	232259956	334	-297	B3GNT7	ENSG00000156966	72.7934	50.983	-21.8104	-19.0014	-3.17693	0.0558025
chr6	127530179	127530713	535	-57041	RNF146	ENSG00000118518	55.1281	78.48	23.3519	10.7631	3.65367	0.0549476	chr2	232798746	232799591	846	-7632	NPPC	ENSG00000163273	68.8939	47.5287	-21.3652	-74.1309	-3.05708	0.0600874
chr6	129648699	129648912	214	382457	ARHGAP18	ENSG00000146376	60.4642	79.7176	19.2533	9.98071	3.44681	0.0563943	chr2	233195609	233196024	416	-2628	DIS3L2	ENSG00000144535	79.2354	56.573	-22.6624	-19.1229	-3.04359	0.0659358
chr6	129649232	129649316	85	382053	ARHGAP18	ENSG00000146376	59.5712	77.7541	18.1829	15.8997	3.24865	0.0563943	chr2	233790609	233791001	393	1862	NGEF	ENSG00000066248	69.7098	47.9066	-21.8032	-44.5727	-3.00141	0.0697066
chr6	133892024	133892094	71	296104	EYA4	ENSG00000112319	64.8928	83.4076	18.5147	9.40065	3.24255	0.0539186	chr2	234934131	234934907	777	-24415	SPP2	ENSG00000072080	33.564	19.1395	-14.4245	-57.723	-3.06282	0.0550867
chr6	134490477	134491580	1104	4421	SGK1	ENSG00000118515	41.3915	76.2063	34.8148	138.576	5.09318	0.0767808	chr2	235004056	235004410	355	44624	SPP2	ENSG00000072080	49.8529	27.0212	-22.8316	-24.5673	-3.32944	0.0604341
chr6	134500896	134501208	313	-1852	SGK1	ENSG00000118515	52.1621	80.4415	28.2794	13.6256	5.57714	0.0597723	chr2	235271612	235272353	742	132890	ARL4C	ENSG00000188042	56.9717	39.5132	-17.4585	-25.2525	-3.02994	0.05346
chr6	136510859	136511345	487	40634	PDE7B	ENSG00000171408	32.1208	51.5022	19.3813	20.2175	4.47592	0.0587707	chr2	235859277	235859756	480	-860	SH3BP4	ENSG00000130147	55.8498	23.0912	-32.7586	-134.62	-3.204	0.056535
chr6	136511817	136511829	13	41592	PDE7B	ENSG00000171408	38.4566	55.987	17.5305	14.8307	3.72964	0.0587707	chr2	235973669	235974468	800	70184	SH3BP4	ENSG00000130147	72.9627	52.101	-20.8618	-31.9691	-3.07114	0.0572182
chr6	137812161	137812322	162	3208	OLIG3	ENSG00000177468	39.0503	55.9886	16.9383	12.1192	3.04376	0.0537923	chr2	236470938	236472014	1077	37969	AGAP1	ENSG00000157985	63.3519	40.5087	-22.8432	-90.9381	-3.00137	0.055213
chr6	146057648	146057826	179	-487	EPM2A	ENSG00000112425	31.0886	47.8444	16.7558	9.84726	3.42157	0.0576701	chr2	236491430	236491612	183	58461	AGAP1	ENSG00000157985	80.9998	62.3388	-18.661	-18.8361	-3.00868	0.05346
chr6	146866116	146866271	156	1286	RAB32	ENSG00000118508	24.6635	45.4476	20.7841	12.9525	3.40686	0.0580678	chr2	236543000	236543926	927	-34321	AGAP1	ENSG00000157985	77.1063	47.4088	-29.6975	-80.7125	-3.25376	0.0617562
chr6	152004146	152004338	193	-7292	ESR1	ENSG00000091831	43.6204	75.6269	32.0065	14.5572	5.07411	0.0554687	chr2	236611014	236611038	25	32765	AGAP1	ENSG00000157985	62.4132	42.0135	-20.3997	-9.05697	-3.01651	0.0538843
chr6	156958354	156958800	447	-140262	ARID1B	ENSG00000049618	51.446	68.5523	17.1062	29.0077	3.27391	0.0566457	chr2	236776369	236777515	1147	-14523	AGAP1	ENSG00000157985	63.4166	32.4032	-31.0134	-100.192	-3.01293	0.0705117
chr6	157909849	157910732	884	-103308	ZDHHC14	ENSG00000175048	36.9633	58.6919	21.7286	76.33	3.92578	0.05546	chr2	237071346	237072017	672	4634	GBX2	ENSG00000168505	70.2437	42.46	-27.7836	-95.5249	-3.04323	0.0672
chr6	158445378	158446623	1246	6880	SYNJ2	ENSG00000078269	57.8789	85.5663	27.6874	112.084	4.87041	0.0675894	chr2	237821294	237821667	374	-172287	COPS8	ENSG00000198612	60.2653	36.2026	-24.0626	-33.821	-3.02246	0.0680432
chr6	158463428	158463858	431	24930	SYNJ2	ENSG00000078269	13.9457	41.7658	27.8202	62.2146	4.2997	0.0797161	chr2	238383016	238383492	477	-10578	MLPH	ENSG00000115648	65.9046	34.7485	-31.1562	-54.8981	-3.10894	0.0752735
chr6	158958949	158959032	84	1480	TMEM181	ENSG00000146433	41.0939	60.2332	19.1393	12.4161	3.28686	0.0556441	chr2	238537095	238537195	101	875	LRRFIP1	ENSG00000124831	60.0447	42.3996	-17.6451	-10.0097	-3.17131	0.0586755
chr6	159236642	159236797	156	2461	EZR	ENSG00000092820	48.2101	75.9866	27.7765	13.3312	3.44854	0.0646643	chr2	238583314	238584267	954	-16520	LRRFIP1	ENSG00000124831	68.1818	37.9077	-30.2741	-100.479	-3.17281	0.0771639
chr6	159237124	159238111	988	1147	EZR	ENSG00000092820	37.9712	65.0182	27.0469	48.3249	3.7186	0.0618856	chr2	238599834	238599989	156	-798	LRRFIP1	ENSG00000124831	57.8542	36.5436	-21.3107	-51.6271	-3.04856	0.0641069
chr6	160115342	160115402	61	-981	SOD2	ENSG00000112096	23.7049	40.9183	17.2134	9.39874	3.22864	0.069016	chr2	238608886	238609807	922	7903	LRRFIP1	ENSG00000124831	59.99	25.4679	-34.5221	-97.5439	-3.07048	0.0732301
chr6	161394410	161394753	344	-18005	MAP3K4	ENSG00000085511	38.5215	64.1404	25.619	36.9174	4.52601	0.0550743	chr2	238641319	238642283	965	40336	LRRFIP1	ENSG00000124831	58.5123	29.4915	-29.0208	-84.4052	-3.21368	0.0561297
chr6	162392142	162392536	395	-697048	AGPAT4	ENSG00000026652	37.3783	59.5353	22.157	24.4835	3.10115	0.0631454	chr2	238777292	238777814	523	8672	RAMP1	ENSG00000132329	81.9814	54.5847	-27.3967	-97.2326	-3.13237	0.0586565
chr6	164253069	164253295	227	296956	QKI	ENSG00000112531	45.4932	73.093	27.5999	12.6737	3.22718	0.0543416	chr2	238782059	238782466	408	13439	RAMP1	ENSG00000132329	65.6908	45.1144	-20.5763	-40.5621	-3.03566	0.0613388
chr6	167411268	167411361	94	-1308	FGFR1OP	ENSG00000213066	25.0544	42.145	17.0906	18.7547	3.98865	0.0540989	chr2	239017137	239018148	1012	8075	ESPNL	ENSG00000144488	56.828	33.088	-23.74	-110.036	-3.06903	0.0571552
chr6	167904085	167905113	1029	-106086	TCP10	ENSG00000203690	26.2381	50.8052	24.5671	103.987	3.68667	0.0643898	chr2	239063796	239064631	836	-3017	FAM132B	ENSG00000178752	56.2804	29.0816	-27.1987	-95.5878	-3.37888	0.0635861
chr6	168076694	168076840	147	-119369	AL009178.1	ENSG00000269155	35.1433	56.6586	21.5153	18.8276	3.22323	0.0621857	chr2	239418880	239419643	764	83234	ASB1	ENSG00000065802	59.1899	39.2945	-19.8954	-69.3416	-3.23305	0.0602689
chr6	168206577	168206618	42	-9050	C6orf123	ENSG00000146521	43.5214	59.1737	15.6523	9.01268	3.00743	0.0602275	chr2	239552883	239553406	524	-203266	TWIST2	ENSG00000233608	71.3114	52.043	-19.2684	-28.5368	-3.41913	0.0594926
chr6	168225463	168225520	58	-2081	MLLT4	ENSG00000130396	30.9279	47.9955	17.0675	12.6942	3.2331	0.0537923	chr2	239712289	239713354	1066	-43318	TWIST2	ENSG00000233608	25.5708	10.6943	-14.8765	-87.9505	-3.02653	0.0546592
chr6	168307785	168307953	169	-8127	MLLT4	ENSG00000130396	47.9763	65.5183	17.542	24.4016	3.06122	0.0565243	chr2	239769527	239770253	727	12853	TWIST2	ENSG00000233608	75.5893	55.2064	-20.3828	-79.6131	-3.15944	0.0540329
chr6	168376325	168376528	204	9501	MLLT4	ENSG00000130396	63.1416	84.3191	21.1775	28.5979	3.22386	0.0627988	chr2	239792537	239792684	148	35863	TWIST2	ENSG00000233608	65.5531	44.7586	-20.7945	-25.2954	-3.05081	0.0705448
chr6	168418570	168418977	408	0	KIF25	ENSG00000125337	30.5557	50.3969	19.8412	26.805	3.72965	0.0544381	chr2	239980237	239981192	956	7484	HDAC4	ENSG00000068024	77.6221	51.7422	-25.8799	-79.369	-3.36542	0.0550253
chr6	168746702	168747327	626	-26267	DACT2	ENSG00000164488	23.2453	47.8686	24.6233	78.7601	3.56808	0.0708191	chr2	240197577	240197721	145	33185	HDAC4	ENSG00000068024	72.573	51.2062	-21.3668	-19.8957	-3.09523	0.0542193
chr6	169020219	169020409	191	-33354	SMOC2	ENSG00000112562	22.4406	37.804	15.3634	18.3188	3.0764	0.0545726	chr2	240201218	240201678	461	29228	HDAC4	ENSG00000068024	73.9107	52.9506	-20.9601	-40.759	-3.0138	0.05346
chr6	169593729	169593953	225	58292	THBS2	ENSG00000186340	57.926	77.1999	19.2739	16.0186	3.24789	0.0552905	chr2	240206723	240207308	586	23598	HDAC4	ENSG00000068024	72.5184	30.0135	-42.5048	-75.2822	-3.00977	0.0964644
chr6	170372100	170372371	272	220206	ERMARD	ENSG00000130023	34.9513	53.2316	18.2803	24.0146	3.55854	0.0540929	chr2	240219902	240220471	570	10435	HDAC4	ENSG00000068024	81.0326	48.5039	-32.5287	-48.1103	-3.02793	0.0822568
chr6	170494224	170494795	572	104765	DLL1	ENSG00000198719	46.5423	74.0847	27.5424	70.2027	4.14521	0.0664776	chr2	240229686	240229936	251	970	HDAC4	ENSG00000068024	80.3185	54.9906	-25.328	-26.972	-3.04028	0.0700937
chr6	170779817	170780159	343	82269	PSMB1	ENSG00000008018	27.7334	48.0691	20.3357	27.1723	3.56881	0.06156	chr2	240240975	240241121	147	-10067	HDAC4	ENSG00000068024	76.8773	54.3082	-22.5692	-15.529	-3.00625	0.0732864
chr7	129114	129194	81	-63774	FAM20C	ENSG00000177706	36.8208	53.8092	16.9883	9.05495	3.03896	0.055616	chr2	240639544	240639654	111	-44899	AC093802.1	ENSG00000220256	75.1434	57.8843	-17.2591	-18.2587	-3.00903	0.0555976
chr7	162421	162492	72	-30476	FAM20C	ENSG00000177706	36.8343	58.6587	21.8244	15.3087	3.08067	0.063002	chr2	241303237	241303672	436	-71415	GPC1	ENSG00000063660	50.1082	31.3847	-18.7236	-66.6613	-3.15676	0.0595543
chr7	165471	165747	277	-27221	FAM20C	ENSG00000177706	42.5217	63.5635	21.0419	19.6323	3.31691	0.0557754	chr2	242118551	242118686	136	-9237	ANO7	ENSG00000146205	59.5907	36.4756	-23.1151	-14.8309	-3.62704	0.0565894
chr7	173504	173589	86	-19379	FAM20C	ENSG00000177706	50.724	74.2839	23.56	15.0423	3.01656	0.0654264	chr2	242257110	242257318	209	-633	HDLBP	ENSG00000115677	36.9586	10.9367	-26.0218	-27.8129	-4.24339	0.0541038
chr7	569165	569694	530	-9231	PDGFA	ENSG00000197461	28.3904	50.0454	21.6549	59.4439	3.53777	0.0602818	chr2	242497843	242497896	54	-239	BOK	ENSG00000176720	56.594	38.5741	-18.0199	-12.8785	-3.03329	0.0542523
chr7	1034627	1034724	98	8333	CYP2W1	ENSG00000073067	42.5225	61.0296	18.5071	27.994	3.13029	0.0771282	chr2	242701989	242702645	657	7499	D2HGDH	ENSG00000180902	76.7005	49.5385	-27.1621	-95.0026	-3.17894	0.0670168
chr7	1081312	1081591	280	-2620	GPR146	ENSG00000164849	45.8791	67.3077	21.4285	49.8331	3.52828	0.05911	chr2	242749258	242749563	306	-356	NEU4	ENSG00000204099	46.4606	28.4771	-17.9835	-51.5606	-3.51961	0.0615159
chr7	1127668	1128825	1158	0	GPER1	ENSG00000164850	13.6958	39.3462	25.6504	161.231	4.87201	0.0613269	chr2	242868461	242868764	304	-23758	AC131097.4	ENSG00000216921	64.8815	33.9501	-30.9314	-12.5173	-3.00415	0.0878366
chr7	1635426	1635633	208	-24784	PSMG3	ENSG00000157778	23.2625	40.7105	17.448	35.0546	3.20717	0.0616712	chr3	4347768	4348344	577	2475	SETMAR	ENSG00000170364	78.8229	54.3382	-24.4847	-34.9453	-3.29462	0.0680577
chr7	1651175	1652172	998	-40533	PSMG3	ENSG00000157778	37.0748	62.3993	25.3245	124.256	6.19918	0.0569736	chr3	5019017	5019144	128	-1656	BHLHE40	ENSG00000134107	53.2876	31.5514	-21.7362	-15.8252	-3.03252	0.0575457
chr7	1957110	1957394	285	22790	MAD1L1	ENSG00000002822	33.3084	56.4847	23.1762	49.6031	3.42034	0.0803362	chr3	5025415	5026043	629	4613	BHLHE40	ENSG00000134107	41.508	14.3472	-27.1608	-51.8377	-3.00392	0.0618176
chr7	2012420	2012827	408	7598	MAD1L1	ENSG00000002822	69.0206	90.6473	21.6267	49.6664	4.8193	0.0551134	chr3	5247560	5247866	307	17525	EDEM1	ENSG00000134109	84.2333	61.8262	-22.4071	-19.5038	-3.04679	0.0549652
chr7	2021593	2021652	60	-1166	MAD1L1	ENSG00000002822	54.0463	69.5335	15.4871	9.15837	3.08433	0.0550098	chr3	8811728	8811763	36	-413	OXTR	ENSG00000180914	52.9788	33.1072	-19.8716	-16.0401	-3.06086	0.0582943
chr7	2049446	2049592	147	-29019	MAD1L1	ENSG00000002822	64.0672	80.3723	16.305	43.8087	3.43169	0.0550098	chr3	9436570	9436950	381	-2452	SETD5	ENSG00000168137	53.6473	31.1736	-22.4737	-29.9372	-3.07958	0.0597098
chr7	2069051	2069391	341	-48624	MAD1L1	ENSG00000002822	49.9632	74.4286	24.4654	29.2236	3.44504	0.0714924	chr3	9792726	9792780	55	0	OGG1	ENSG00000114026	63.6282	45.8581	-17.7702	-12.3652	-3.07645	0.0547234
chr7	2076950	2077138	189	42509	MAD1L1	ENSG00000002822	22.6307	51.0805	28.4498	25.8786	3.91134	0.0690541	chr3	9810065	9810754	690	906	CAMK1	ENSG00000134072	45.4352	26.4035	-19.0317	-17.2432	-3.03993	0.0556539
chr7	2100525	2100711	187	18936	MAD1L1	ENSG00000002822	61.8286	82.4878	20.6592	25.6858	3.89015	0.0578348	chr3	9974203	9974400	198	-1105	CRELD1	ENSG00000163703	41.8703	20.4178	-21.4524	-34.0637	-3.07518	0.0566716
chr7	2125933	2126218	286	-6284	MAD1L1	ENSG00000002822	66.947	84.8122	17.8652	33.3918	3.49033	0.0567066	chr3	10238094	10239017	924	31544	IRAK2	ENSG00000134070	75.4462	46.9445	-28.5017	-70.934	-3.08184	0.0693163
chr7	2842500	2843020	521	11871	GNA12	ENSG00000146535	43.5374	65.1806	21.6432	80.0074	3.77302	0.0661532	chr3	10291643	10291974	332	1046	TATDN2	ENSG00000157014	45.9188	24.5574	-21.3613	-14.652	-3.43571	0.0547234
chr7	2870774	2870947	174	12702	GNA12	ENSG00000146535	55.0787	72.8135	17.7348	13.4999	3.49771	0.0561762	chr3	10418895	10419316	422	33042	ATP2B2	ENSG00000157087	38.9368	26.5393	-12.3975	-43.1601	-3.04113	0.0593012
chr7	4053312	4053625	314	62759	SDK1	ENSG00000146555	40.9973	62.895	21.8977	40.4677	3.15371	0.0614084	chr3	11599561	11599672	112	10725	VGLL4	ENSG00000144560	43.6043	25.8382	-17.7661	-21.9685	-3.05175	0.0573931
chr7	5216559	5216748	190	-13070	WIPI2	ENSG00000157954	31.4409	48.3647	16.9238	15.3897	3.13596	0.0566937	chr3	13420863	13421024	162	40784	NUP210	ENSG00000132182	60.3553	43.3892	-16.9661	-18.2028	-3.00891	0.0586705
chr7	5367003	5367348	346	5160	TNRC18	ENSG00000182095	40.8239	66.1283	25.3044	19.7867	4.37116	0.0628802	chr3	14257973	14258551	579	-37689	XPC	ENSG00000154767	73.1664	54.6493	-18.5171	-54.6127	-3.0638	0.0678812
chr7	6358324	6358429	106	19894	FAM220A	ENSG00000178397	61.4378	84.1262	22.6884	16.9642	3.45203	0.0626489	chr3	14339294	14339823	530	-104252	SLC6A6	ENSG00000131389	67.5573	47.0943	-20.4631	-142.347	-3.06061	0.0724893
chr7	7295951	7296969	1019	21999	C1GALT1	ENSG00000106392	48.6232	81.0499	32.4266	57.6452	5.57012	0.0552179	chr3	15107319	15107553	235	-476	MRPS25	ENSG00000131368	61.905	43.7498	-18.1552	-46.0834	-3.02696	0.0572282
chr7	15094242	15094287	46	-79839	DGKB	ENSG00000136267	45.8774	65.9818	20.1044	13.0383	3.30748	0.0554877	chr3	15310604	15312038	1435	5377	SH3BP5	ENSG00000131370	74.7753	35.9439	-38.8314	-163.162	-3.23426	0.0755687
chr7	15723688	15724433	746	2003	MEOX2	ENSG00000106511	41.0746	68.6737	27.5991	35.0472	3.79296	0.0637209	chr3	15371359	15372114	756	1952	SH3BP5	ENSG00000131370	62.5265	23.1424	-39.3841	-38.1929	-3.05067	0.0998817
chr7	17337172	17337976	805	-269	AHR	ENSG00000106546	59.2393	82.1334	22.8941	27.734	6.06192	0.0568216	chr3	16096607	16097935	1329	-118220	GALNT15	ENSG00000131386	79.7803	48.6185	-31.1618	-73.8074	-3.63718	0.0618592
chr7	17923358	17923659	302	56431	SNX13	ENSG00000071189	63.4381	83.2457	19.8076	18.8218	3.30236	0.0551043	chr3	16924418	16925533	1116	-918	PLCL2	ENSG00000154822	82.1543	58.1133	-24.0409	-146.373	-3.06742	0.0637115
chr7	17924078	17924433	356	55657	SNX13	ENSG00000071189	67.2492	87.3162	20.067	12.7334	3.36276	0.0551043	chr3	17782211	17782533	323	0	TBC1D5	ENSG00000131374	73.7635	47.8806	-25.8829	-16.475	-3.00154	0.055424
chr7	19810571	19810708	138	2108	TMEM196	ENSG00000173452	20.8392	43.9118	23.0726	12.2098	4.16257	0.0552609	chr3	19987815	19987894	80	606	EFHB	ENSG00000163576	58.2399	37.6252	-20.6147	-12.7015	-3.05883	0.060078
chr7	20374072	20374274	203	3325	ITGB8	ENSG00000105855	47.2492	77.0263	29.7772	11.8578	4.11133	0.0596329	chr3	20228835	20229124	290	-1050	SGOL1	ENSG00000129810	38.8327	18.8566	-19.9761	-13.9936	-3.16365	0.0568983
chr7	25107928	25108756	829	56111	CYCS	ENSG00000172115	43.964	66.3306	22.3666	41.5915	3.26634	0.0604144	chr3	22414804	22415271	468	-621876	ZNF385D	ENSG00000151789	69.9023	51.6003	-18.302	-29.361	-3.28154	0.0710941
chr7	25898991	25899423	433	-292436	NFE2L3	ENSG00000050344	35.1948	57.024	21.8292	58.0066	3.56186	0.0609838	chr3	23804623	23804728	106	-42665	UBE2E1	ENSG00000170142	39.9923	19.9121	-20.0803	-9.12346	-3.02738	0.0638009
chr7	27160052	27160674	623	-837	HOXA3	ENSG00000105997	38.2532	53.8238	15.5706	31.8894	3.26286	0.0676064	chr3	23849114	23849157	44	533	UBE2E1	ENSG00000170142	34.9891	12.6079	-22.3812	-10.7832	-3.13059	0.0587755
chr7	27279969	27279998	30	-2165	EVX1	ENSG00000106038	38.8034	59.5594	20.756	9.09749	3.03496	0.0624699	chr3	23851560	23851784	225	-149	UBE2E1	ENSG00000170142	67.5987	41.1333	-26.4655	-30.0446	-3.48058	0.0587755
chr7	27565815	27566205	391	121169	HIBADH	ENSG00000106049	60.0123	80.0617	20.0494	18.7124	3.20755	0.0576994	chr3	25495232	25495686	455	-4114	RARB	ENSG00000077092	52.4549	28.7816	-23.6734	-44.2916	-3.013	0.0656595
chr7	29687025	29687633	609	81958	PRR15	ENSG00000176532	42.3737	70.6109	28.2372	33.6867	5.52331	0.0550098	chr3	27675068	27675305	238	88497	EOMES	ENSG00000163508	61.0846	36.9312	-24.1534	-27.1452	-3.42655	0.0633249
chr7	32109831	32109917	87	543	PDE1C	ENSG00000154678	3.40446	14.7918	11.3873	19.5521	3.49206	0.0746655	chr3	28281945	28282092	148	-993	CMC1	ENSG00000187118	66.1562	45.2006	-20.9555	-14.0286	-3.37889	0.0599641
chr7	32932697	32932961	265	-351	KBTBD2	ENSG00000170852	39.0639	63.7615	24.6977	15.3529	4.23051	0.0625177	chr3	29425442	29425761	320	102334	RBMS3	ENSG00000144642	74.6947	50.4848	-24.2099	-12.2163	-3.00632	0.058564
chr7	33942604	33942720	117	-1802	BMPER	ENSG00000164619	58.7288	86.8797	28.1509	11.6776	4.2774	0.0702627	chr3	29661336	29661505	170	338228	RBMS3	ENSG00000144642	80.828	57.1208	-23.7072	-14.7044	-3.65172	0.057499
chr7	40644249	40644741	493	469629	SUGCT	ENSG00000175600	65.0139	83.2859	18.272	44.6272	3.23442	0.0552683	chr3	30014199	30014454	256	-633539	TGFBR2	ENSG00000163513	73.6336	52.3231	-21.3105	-9.9796	-3.3031	0.0547234
chr7	42258332	42258498	167	8821	GLI3	ENSG00000106571	64.0847	76.7321	12.6475	16.0827	3.28191	0.0578431	chr3	30535089	30535166	78	-112827	TGFBR2	ENSG00000163513	56.3064	31.8061	-24.5003	-16.5838	-3.27574	0.0668183
chr7	42258870	42259157	288	8162	GLI3	ENSG00000106571	68.316	81.587	13.2711	9.81735	3.41738	0.0592511	chr3	30718206	30718469	264	70112	TGFBR2	ENSG00000163513	75.4818	52.3831	-23.0987	-14.7966	-3.6021	0.0569769
chr7	44330891	44331623	733	31937	CAMK2B	ENSG00000058404	32.1861	50.7969	18.6108	66.8859	3.8124	0.0632452	chr3	30718868	30719023	156	70774	TGFBR2	ENSG00000163513	75.2372	53.618	-21.6191	-27.1938	-3.24524	0.0570179
chr7	44673379	44673519	141	9317	OGDH	ENSG00000105953	40.115	57.0476	16.9326	9.59846	3.23588	0.0570607	chr3	30936531	30936575	45	-273	GADL1	ENSG00000144644	25.8556	12.1676	-13.688	-10.7376	-3.39621	0.054857
chr7	45612901	45613287	387	-451	ADCY1	ENSG00000164742	28.6866	60.3053	31.6187	54.9439	4.25345	0.064049	chr3	32242605	32242705	101	-37465	CMTM8	ENSG00000170293	59.9618	46.6627	-13.2991	-9.04213	-3.00389	0.0551909
chr7	51707841	51708921	1081	-323325	COBL	ENSG00000106078	28.4084	51.0032	22.5948	69.7272	3.75466	0.0567141	chr3	32542659	32543125	467	1774	CMTM6	ENSG00000091317	69.9378	43.175	-26.7628	-33.9181	-3.00831	0.0603384
chr7	54608496	54608849	354	-1168	VSTM2A	ENSG00000170419	22.3237	44.9299	22.6062	13.3389	3.52364	0.058215	chr3	32619234	32619410	177	-6867	DYNC1LI1	ENSG00000144635	45.5187	27.0237	-18.495	-13.7536	-3.32377	0.0632982
chr7	55313886	55314976	1091	-118164	LANCL2	ENSG00000132434	60.9367	82.765	21.8283	46.7177	4.09654	0.0564829	chr3	33156634	33156716	83	1087	CRTAP	ENSG00000170275	53.3551	33.8516	-19.5035	-21.0932	-3.05073	0.0586577
chr7	63086060	63086120	61	-227199	AC073188.1	ENSG00000268181	44.6715	65.5176	20.8461	9.19258	3.11568	0.0588164	chr3	33479298	33479430	133	2071	UBP1	ENSG00000153560	58.309	32.8986	-25.4104	-12.5117	-3.8623	0.0547841
chr7	64042539	64043037	499	-19054	ZNF680	ENSG00000173041	57.0483	82.3863	25.338	51.6485	5.26289	0.0598954	chr3	38004565	38005254	690	-815	CTDSPL	ENSG00000144677	70.929	47.7048	-23.2242	-27.8776	-3.05443	0.0614276
chr7	65788248	65788349	102	101656	TPST1	ENSG00000169902	64.992	84.3849	19.3929	16.1894	3.31875	0.0562485	chr3	38179467	38179714	248	-254	MYD88	ENSG00000172936	45.6981	26.784	-18.914	-23.7047	-3.00233	0.0547234
chr7	66600234	66600581	348	138426	TYW1	ENSG00000198874	57.9489	81.4047	23.4557	27.2313	4.09224	0.0550098	chr3	39092781	39092989	209	-499	WDR48	ENSG00000114742	67.2687	46.3325	-20.9362	-18.0311	-3.13418	0.0567978
chr7	66601005	66601223	219	139197	TYW1	ENSG00000198874	57.0553	78.4328	21.3775	10.5528	3.80927	0.0550098	chr3	40567032	40567328	297	124	ZNF621	ENSG00000172888	53.9082	35.3397	-18.5686	-25.5198	-3.05205	0.0576544
chr7	66608556	66608900	345	146748	TYW1	ENSG00000198874	61.9503	80.5911	18.6408	16.4915	3.504	0.0559991	chr3	42262818	42263207	390	28248	TRAK1	ENSG00000182606	89.1949	63.2634	-25.9315	-26.2682	-3.3063	0.0617587
chr7	67003634	67005117	1484	541826	TYW1	ENSG00000198874	28.0636	50.0612	21.9976	92.8729	3.78358	0.0570048	chr3	43731153	43731321	169	-283	ABHD5	ENSG00000011198	61.3699	43.439	-17.9308	-9.28509	-3.03171	0.0563852
chr7	69336331	69337260	930	271733	AUTS2	ENSG00000158321	40.8565	73.1374	32.2809	49.424	3.49569	0.0635559	chr3	43936333	43936605	273	183133	ABHD5	ENSG00000011198	63.4587	44.2295	-19.2292	-41.5326	-3.03467	0.0654027
chr7	70169242	70170902	1661	-23222	AUTS2	ENSG00000158321	56.7308	83.5435	26.8127	110.661	5.61241	0.0604726	chr3	44481977	44482498	522	36663	ZNF445	ENSG00000185219	72.4464	48.115	-24.3314	-30.9877	-3.05462	0.064638
chr7	72140643	72141127	485	68597	TYW1B	ENSG00000254184	52.3363	71.2225	18.8862	12.3486	3.16562	0.055321	chr3	44517596	44517972	377	1189	ZNF445	ENSG00000185219	55.2921	28.2899	-27.0022	-25.3072	-3.15162	0.0602373
chr7	72960493	72960576	84	11424	BCL7B	ENSG00000106635	65.5875	82.1987	16.6111	12.3393	3.10634	0.0550098	chr3	45624335	45624753	419	-11062	LIMD1	ENSG00000144791	67.4096	50.8678	-16.5418	-9.38175	-3.10674	0.054963
chr7	73318820	73319493	674	43330	WBSCR28	ENSG00000175877	27.522	54.7297	27.2076	96.0388	4.52465	0.0628846	chr3	45648786	45648969	184	12434	LIMD1	ENSG00000144791	61.4552	39.6854	-21.7697	-15.5109	-3.02784	0.0685198
chr7	73400370	73401320	951	-40798	ELN	ENSG00000049540	44.5528	75.7344	31.1816	129.883	5.70479	0.0594492	chr3	46608274	46608348	75	-233	LRRC2	ENSG00000163827	56.3673	27.8046	-28.5627	-14.4584	-4.5022	0.0550044
chr7	73428671	73428845	175	-13273	ELN	ENSG00000049540	58.8649	78.5425	19.6776	12.1834	3.06598	0.0564124	chr3	46735525	46735703	179	-333	ALS2CL	ENSG00000178038	59.3046	42.1137	-17.1909	-50.9943	-3.08593	0.0549822
chr7	73436425	73436817	393	-5301	ELN	ENSG00000049540	54.6937	78.6443	23.9506	47.8468	3.79995	0.0603033	chr3	47207029	47207211	183	-1571	SETD2	ENSG00000181555	48.9625	29.3032	-19.6593	-32.6997	-3.02665	0.0597233
chr7	73536022	73536579	558	28612	LIMK1	ENSG00000106683	60.4191	82.2771	21.8579	65.1982	3.91855	0.0582968	chr3	48063526	48064545	1020	-5623	MAP4	ENSG00000047849	92.1226	65.3123	-26.8103	-80.6459	-3.82077	0.0547234
chr7	73660769	73661168	400	7550	RFC2	ENSG00000049541	53.8702	72.852	18.9818	17.921	3.81378	0.0558753	chr3	48283466	48283597	132	869	ZNF589	ENSG00000164048	64.799	45.1507	-19.6483	-13.2177	-3.08158	0.0588697
chr7	75603593	75604064	472	-5612	POR	ENSG00000127948	54.8033	69.2931	14.4898	45.3684	3.70394	0.055073	chr3	49237049	49237672	624	105	CCDC36	ENSG00000173421	63.3416	35.073	-28.2686	-197.653	-3.10958	0.054749
chr7	75637927	75638420	494	19568	STYXL1	ENSG00000127952	43.828	63.052	19.224	22.5771	3.39422	0.0577763	chr3	49303651	49304423	773	6132	RP11-3B7.1	ENSG00000225399	73.7523	51.5299	-22.2223	-42.6651	-3.16074	0.0580197
chr7	75698645	75698934	290	21165	MDH2	ENSG00000146701	33.1823	53.7199	20.5376	22.4476	3.26871	0.0685494	chr3	50310828	50311282	455	-5175	LSMEM2	ENSG00000179564	50.5707	27.5075	-23.0632	-168.145	-3.01434	0.056583
chr7	75939760	75940266	507	6865	HSPB1	ENSG00000106211	47.2947	69.7326	22.4379	50.9851	4.33537	0.0550098	chr3	50341009	50341183	175	0	HYAL1	ENSG00000114378	73.9641	56.2335	-17.7306	-12.576	-3.06154	0.0575618
chr7	76144472	76144648	177	4539	UPK3B	ENSG00000243566	55.1102	76.6006	21.4904	10.6998	4.06525	0.0622724	chr3	51621657	51622156	500	-41250	RAD54L2	ENSG00000164080	78.8675	55.8163	-23.0512	-32.6452	-3.01054	0.0668752
chr7	78118521	78118925	405	281470	MAGI2	ENSG00000187391	35.7803	59.4158	23.6355	16.3603	3.44833	0.0592823	chr3	52007390	52007594	205	-105	ABHD14A	ENSG00000248487	62.6254	39.8836	-22.7418	-43.8676	-3.26046	0.0547313
chr7	78196740	78197049	310	203346	MAGI2	ENSG00000187391	57.6723	73.1263	15.454	9.57898	3.45705	0.0555133	chr3	52017943	52017985	43	389	ACY1	ENSG00000243989	66.5658	47.2479	-19.3179	-15.6295	-3.07529	0.0547234
chr7	78868649	78869614	966	213171	MAGI2	ENSG00000187391	41.4507	63.9946	22.5439	33.1917	3.95632	0.057218	chr3	52187226	52187661	436	758	POC1A	ENSG00000164087	47.3521	26.7772	-20.5749	-19.0298	-3.20838	0.0547234
chr7	79647189	79647979	791	-115291	GNAI1	ENSG00000127955	47.1571	67.1506	19.9935	21.3158	3.77104	0.0571624	chr3	53121934	53122233	300	-41254	SFMBT1	ENSG00000163935	79.4158	57.2411	-22.1746	-16.9272	-3.1636	0.0556207
chr7	80710280	80710817	538	-94006	AC005008.2	ENSG00000237896	53.0417	78.2292	25.1875	37.7664	3.63369	0.0607338	chr3	56809776	56810433	658	-90	ARHGEF3	ENSG00000163947	58.5913	39.4159	-19.1754	-39.9062	-3.18581	0.0571144
chr7	80711476	80711883	408	-92940	AC005008.2	ENSG00000237896	52.4145	77.3352	24.9207	10.2337	3.58261	0.0602434	chr3	56835217	56835465	249	511	ARHGEF3	ENSG00000163947	69.287	47.9479	-21.3391	-18.2757	-3.17768	0.0571843
chr7	80791199	80791365	167	-13458	AC005008.2	ENSG00000237896	52.8727	76.7977	23.9249	13.5373	3.45467	0.05853	chr3	57008678	57009360	683	2042	ARHGEF3	ENSG00000163947	83.2278	59.2002	-24.0276	-69.343	-3.03971	0.0553803
chr7	90395737	90396232	496	56560	CDK14	ENSG00000058091	62.3331	83.2143	20.8812	28.1572	3.21189	0.0550098	chr3	57144890	57145175	286	31343	IL17RD	ENSG00000144730	60.8705	34.628	-26.2425	-48.9127	-3.33712	0.0739571
chr7	99215240	99215315	76	650	ZSCAN25	ENSG00000197037	49.1114	68.1159	19.0045	13.8437	3.53734	0.0556231	chr3	57164654	57165022	369	11496	IL17RD	ENSG00000144730	76.2292	50.9691	-25.2602	-32.8994	-3.00825	0.0810147
chr7	99705979	99706132	154	3019	AP4M1	ENSG00000221838	63.2005	78.2776	15.0771	28.6068	3.22722	0.0550098	chr3	57184896	57185192	297	-8361	IL17RD	ENSG00000144730	61.8862	33.5918	-28.2944	-11.5377	-3.36426	0.0758112
chr7	100463490	100464384	895	-375	TRIP6	ENSG00000087077	57.9899	82.3159	24.326	212.64	4.52441	0.0686937	chr3	57186001	57186420	420	-9466	IL17RD	ENSG00000144730	63.5299	35.6093	-27.9207	-40.8105	-3.03372	0.0758153
chr7	101505712	101506581	870	44791	CUX1	ENSG00000257923	56.2884	78.81	22.5216	52.8501	4.14423	0.0611556	chr3	57197870	57198069	200	1333	IL17RD	ENSG00000144730	47.0806	23.8225	-23.2581	-13.4754	-3.1007	0.0664011
chr7	101542978	101543824	847	82057	CUX1	ENSG00000257923	7.03035	40.0132	32.9829	103.542	4.02334	0.0835518	chr3	57580842	57581273	432	1778	ARF4	ENSG00000168374	38.2873	16.6077	-21.6796	-16.5964	-3.07825	0.0553339
chr7	101544147	101544352	206	83226	CUX1	ENSG00000257923	27.7398	57.1339	29.3941	10.5479	4.00667	0.0779039	chr3	61545264	61545573	310	-2011	PTPRG	ENSG00000144724	55.3552	27.4054	-27.9497	-40.012	-3.04084	0.0572051
chr7	101571047	101571502	456	110126	CUX1	ENSG00000257923	41.3538	62.7751	21.4213	64.012	3.47213	0.0563143	chr3	61899880	61900524	645	352294	PTPRG	ENSG00000144724	87.7486	65.8888	-21.8598	-32.6024	-3.10996	0.0603004
chr7	101796643	101797380	738	-120064	CUX1	ENSG00000257923	56.6296	81.1685	24.5389	54.9594	3.63889	0.0686927	chr3	65342228	65343038	811	121270	MAGI1	ENSG00000151276	36.2235	15.727	-20.4965	-269.697	-3.03149	0.0594481
chr7	102254146	102254572	427	-1556	RASA4	ENSG00000105808	22.0102	49.2749	27.2647	19.0064	5.26554	0.0576674	chr3	65772945	65773598	654	-189383	MAGI1	ENSG00000151276	53.5884	32.3378	-21.2506	-39.4837	-3.47184	0.0547234
chr7	105049962	105050141	180	-20123	SRPK2	ENSG00000135250	57.5527	78.2158	20.6631	9.3599	3.12837	0.0587774	chr3	65796027	65796712	686	-212465	MAGI1	ENSG00000151276	65.2739	47.1884	-18.0855	-35.6132	-3.00771	0.0598623
chr7	105137023	105137966	944	10615	PUS7	ENSG00000091127	64.1238	86.9564	22.8326	32.475	4.40182	0.0587954	chr3	66443811	66444706	896	106649	LRIG1	ENSG00000144749	77.3744	49.3021	-28.0723	-71.9818	-3.21489	0.064696
chr7	105284087	105284377	291	-19373	ATXN7L1	ENSG00000146776	49.7285	67.8905	18.162	22.5742	3.83054	0.0575016	chr3	66549242	66549354	113	2001	LRIG1	ENSG00000144749	66.1938	44.8019	-21.3919	-12.6723	-3.11545	0.0649983
chr7	105284801	105284968	168	-20087	ATXN7L1	ENSG00000146776	37.7471	61.6866	23.9395	21.1552	4.26243	0.0575016	chr3	68980411	68980489	79	1229	FAM19A4	ENSG00000163377	49.1439	22.5135	-26.6304	-22.0792	-3.13104	0.0758812
chr7	105510173	105510381	209	6541	ATXN7L1	ENSG00000146776	61.9404	77.1369	15.1965	9.19219	3.09915	0.0550098	chr3	69434319	69435031	713	192	FRMD4B	ENSG00000114541	41.0873	10.3219	-30.7653	-114.3	-3.08375	0.0606829
chr7	106620024	106620529	506	-64564	PRKAR2B	ENSG00000005249	31.3204	54.0556	22.7352	30.2479	3.42951	0.057993	chr3	71017125	71018658	1534	95418	FOXP1	ENSG00000114861	91.7792	64.0609	-27.7182	-71.4343	-3.80154	0.0547234
chr7	107730749	107731607	859	-26404	LAMB4	ENSG00000091128	63.7697	87.551	23.7813	31.6535	3.76019	0.0578793	chr3	71054846	71055610	765	58466	FOXP1	ENSG00000114861	61.6797	40.4807	-21.199	-41.1352	-3.02756	0.0547234
chr7	108089540	108089963	424	6801	NRCAM	ENSG00000091129	44.7494	64.4704	19.721	25.398	3.27717	0.058224	chr3	71505536	71505826	291	86881	FOXP1	ENSG00000114861	56.3389	36.0394	-20.2996	-15.2589	-3.01572	0.0568062
chr7	111381244	111381500	257	42983	DOCK4	ENSG00000128512	40.2258	61.1699	20.9442	19.3879	3.42757	0.056413	chr3	71629528	71630294	767	2609	FOXP1	ENSG00000114861	71.4935	37.484	-34.0095	-36.5498	-3.34995	0.0615097
chr7	117510729	117511669	941	22	CTTNBP2	ENSG00000077063	32.4758	54.5714	22.0956	37.2656	4.28734	0.0634407	chr3	71803952	71804304	353	-27	EIF4E3	ENSG00000163412	47.4999	25.6909	-21.809	-131.696	-3.05783	0.0593744
chr7	117825545	117825948	404	1323	NAA38	ENSG00000128534	54.756	71.2665	16.5105	16.4895	3.53579	0.0557782	chr3	72403107	72403796	690	92272	RYBP	ENSG00000163602	69.8679	55.9082	-13.9597	-28.0967	-3.02466	0.0554253
chr7	123199418	123199904	487	-1108	NDUFA5	ENSG00000128609	32.1941	54.3213	22.1273	10.9513	3.98889	0.0572788	chr3	72788604	72788654	51	106859	SHQ1	ENSG00000144736	64.5482	50.5948	-13.9534	-9.17223	-3.03753	0.0570101
chr7	127595193	127595573	381	67227	SND1	ENSG00000197157	67.5539	85.761	18.2071	21.7242	3.19226	0.0554401	chr3	73610700	73610745	46	23	PDZRN3	ENSG00000121440	74.725	52.5221	-22.2028	-9.05757	-3.0076	0.067829
chr7	127992688	127992828	141	6860	PRRT4	ENSG00000224940	36.0471	53.3852	17.3382	9.38101	3.20532	0.0550893	chr3	85011114	85011416	303	2416	CADM2	ENSG00000175161	48.5215	26.139	-22.3825	-16.2847	-3.07906	0.0632065
chr7	128044025	128044305	281	1690	IMPDH1	ENSG00000106348	64.4857	84.956	20.4704	23.1287	3.48791	0.0597485	chr3	98312971	98313183	213	-403	CPOX	ENSG00000080819	71.4759	52.3019	-19.174	-44.2923	-3.11458	0.0564184
chr7	128668634	128668702	69	26234	TNPO3	ENSG00000064419	63.6892	82.8913	19.2021	9.47557	3.2348	0.0550098	chr3	98603573	98604538	966	15476	DCBLD2	ENSG00000057019	70.0396	42.5347	-27.5049	-40.4793	-3.10472	0.0592911
chr7	128669197	128669570	374	25366	TNPO3	ENSG00000064419	61.5477	81.6298	20.0821	13.2687	3.5079	0.0550098	chr3	99639356	99639715	360	-44309	FILIP1L	ENSG00000168386	49.827	31.882	-17.945	-18.9067	-3.04196	0.0558251
chr7	128830273	128830704	432	1559	SMO	ENSG00000128602	39.0094	59.528	20.5186	14.1346	3.67389	0.0563068	chr3	106960970	106961172	203	-135015	CCDC54	ENSG00000138483	31.8181	10.7645	-21.0536	-10.5514	-3.19014	0.056173
chr7	129935744	129936581	838	2624	CPA4	ENSG00000128510	56.6313	82.2825	25.6512	71.517	4.36421	0.0636943	chr3	107808114	107808246	133	1614	CD47	ENSG00000196776	51.086	28.0124	-23.0736	-14.5785	-3.37413	0.060024
chr7	131370454	131370630	177	-129077	PODXL	ENSG00000128567	23.6982	44.2806	20.5824	12.3143	3.09342	0.0582866	chr3	113386990	113387140	151	6602	KIAA2018	ENSG00000176542	77.7056	54.4734	-23.2322	-13.6571	-3.26498	0.0547234
chr7	134583393	134583597	205	7031	CALD1	ENSG00000122786	46.3238	63.1554	16.8316	25.2431	3.24995	0.0564737	chr3	117348026	117348752	727	367342	LSAMP	ENSG00000185565	70.3819	44.3109	-26.071	-46.7465	-3.16729	0.0594172
chr7	136955711	136956655	945	71864	PTN	ENSG00000105894	33.7338	58.5167	24.7829	43.1861	4.25323	0.0573818	chr3	117717026	117717221	196	-930	LSAMP	ENSG00000185565	51.8585	33.3048	-18.5537	-15.1617	-3.61334	0.0569582
chr7	142553466	142553883	418	642	EPHB6	ENSG00000106123	22.8628	41.3962	18.5334	42.5383	4.47638	0.0589127	chr3	118752334	118752740	407	834	IGSF11	ENSG00000144847	69.3192	47.4497	-21.8695	-21.4261	-3.30123	0.0606024
chr7	147714881	147715508	628	-115267	CNTNAP2	ENSG00000174469	20.2504	42.0481	21.7977	34.122	3.18666	0.0634762	chr3	119395142	119395296	155	896	COX17	ENSG00000138495	48.7728	27.4451	-21.3278	-10.0713	-3.20473	0.0608239
chr7	149111321	149111473	153	46740	ZNF777	ENSG00000196453	36.5138	61.6354	25.1215	17.8876	3.74696	0.0563826	chr3	120069560	120069764	205	-1373	LRRC58	ENSG00000163428	63.3339	42.407	-20.9268	-19.756	-3.07952	0.0601497
chr7	149725202	149725911	710	154069	ATP6V0E2	ENSG00000171130	16.897	37.828	20.931	45.0063	3.30014	0.0606088	chr3	120462723	120462922	200	1131	GTF2E1	ENSG00000153767	73.7194	52.1249	-21.5945	-18.4134	-3.28996	0.0573888
chr7	149726217	149726886	670	155084	ATP6V0E2	ENSG00000171130	21.2975	42.8175	21.5199	36.7257	3.43298	0.060584	chr3	120628781	120629168	388	362	STXBP5L	ENSG00000145087	63.8057	33.5369	-30.2688	-17.2198	-3.71391	0.059873
chr7	150657596	150657816	221	147	KCNH2	ENSG00000055118	50.575	73.7322	23.1571	21.9702	3.18221	0.0622758	chr3	121552953	121553138	186	724	IQCB1	ENSG00000173226	74.8935	57.0036	-17.8899	-13.9794	-3.10594	0.0547478
chr7	150672768	150673307	540	1706	KCNH2	ENSG00000055118	47.661	71.0631	23.4021	23.3241	4.21951	0.0572885	chr3	121739638	121739848	211	1120	ILDR1	ENSG00000145103	62.2015	39.4953	-22.7063	-10.1876	-3.22568	0.0638445
chr7	150953259	150954272	1014	-7199	SMARCD3	ENSG00000082014	34.5462	63.1845	28.6384	123.546	5.77919	0.0567476	chr3	121740551	121740710	160	258	ILDR1	ENSG00000145103	42.6076	18.3498	-24.2578	-10.6777	-3.0965	0.0650659
chr7	151620672	151621846	1175	-31617	GALNTL5	ENSG00000106648	50.7034	71.9294	21.226	78.7052	3.67821	0.0551643	chr3	121901905	121902612	708	0	CASR	ENSG00000036828	50.6609	23.3559	-27.305	-57.6439	-3.01167	0.05944
chr7	154996722	154997145	424	-6575	AC099552.4	ENSG00000217825	23.6059	42.0438	18.438	50.9504	4.04737	0.0557928	chr3	122400437	122400829	393	730	PARP14	ENSG00000173193	60.068	37.6679	-22.4002	-49.6396	-3.05629	0.0555347
chr7	156514625	156514931	307	74255	LMBR1	ENSG00000105983	34.5363	72.105	37.5687	20.7383	5.24859	0.0636062	chr3	122514769	122514814	46	1126	DIRC2	ENSG00000138463	49.8106	30.5665	-19.2442	-9.63146	-3.15329	0.0555751
chr7	156515233	156515544	312	73642	LMBR1	ENSG00000105983	31.6156	66.6119	34.9963	14.2883	4.87998	0.0636062	chr3	124470606	124470736	131	21306	UMPS	ENSG00000114491	78.3198	61.6097	-16.7101	-9.22327	-3.06822	0.0547234
chr7	156516067	156516984	918	72202	LMBR1	ENSG00000105983	28.9999	57.4245	28.4246	33.2929	4.10215	0.0636062	chr3	124493335	124493711	377	44035	UMPS	ENSG00000114491	82.167	57.7591	-24.4079	-32.7034	-3.10277	0.0573281
chr7	156833807	156834604	798	-30461	MNX1	ENSG00000130675	22.281	47.8962	25.6152	61.8421	4.04457	0.0581535	chr3	124509668	124511314	1647	28990	ITGB5	ENSG00000082781	66.2556	35.6003	-30.6553	-81.1742	-3.0807	0.0575802
chr7	157801907	157802473	567	395191	AC005481.5	ENSG00000222012	29.6072	46.1448	16.5377	27.9663	3.19033	0.0580761	chr3	124529654	124530889	1236	9415	ITGB5	ENSG00000082781	73.6307	40.2177	-33.413	-82.5359	-3.48059	0.0610246
chr7	158814743	158815180	438	74714	VIPR2	ENSG00000106018	48.9433	72.9741	24.0308	37.6169	3.19587	0.0662601	chr3	124604450	124604549	100	1594	ITGB5	ENSG00000082781	38.0713	17.4584	-20.6129	-14.5767	-3.55923	0.0553453
chr8	344375	344978	604	-11449	FBXO25	ENSG00000147364	54.373	74.2166	19.8436	37.3689	3.95455	0.0572455	chr3	124762705	124763590	886	11211	HEG1	ENSG00000173706	65.4208	38.7252	-26.6956	-73.3065	-3.04168	0.0584458
chr8	440386	440594	209	54242	TDRP	ENSG00000180190	21.349	38.3079	16.9588	26.3261	3.33868	0.0591695	chr3	124859347	124860209	863	-19648	SLC12A8	ENSG00000221955	70.7313	43.3155	-27.4158	-62.8141	-3.16205	0.0569528
chr8	496508	496919	412	-726	TDRP	ENSG00000180190	20.3388	41.1424	20.8037	36.9816	4.27988	0.0616754	chr3	125803740	125803859	120	-592	SLC41A3	ENSG00000114544	78.9323	59.0213	-19.911	-9.91649	-3.07227	0.0581121
chr8	592921	593775	855	29881	ERICH1	ENSG00000104714	47.7505	88.5604	40.8099	177.409	5.24818	0.085902	chr3	125986791	125986901	111	-69953	ALDH1L1	ENSG00000144908	48.5943	29.8099	-18.7844	-13.3979	-3.14965	0.059314
chr8	639725	640201	477	-16067	ERICH1	ENSG00000104714	66.0999	89.2276	23.1277	56.9765	3.76443	0.0680862	chr3	126195671	126196477	807	-908	ZXDC	ENSG00000070476	62.5428	34.6652	-27.8776	-89.6606	-3.01147	0.0557401
chr8	716153	716564	412	-34913	ERICH1	ENSG00000104714	33.8366	52.201	18.3644	34.1881	3.17003	0.0568514	chr3	126679999	126680825	827	-26611	PLXNA1	ENSG00000114554	71.3424	52.9947	-18.3477	-49.2668	-3.12155	0.05488
chr8	1224523	1224977	455	-224554	DLGAP2	ENSG00000198010	24.2763	40.9233	16.647	15.2577	3.10681	0.0565201	chr3	126720730	126721049	320	13292	PLXNA1	ENSG00000114554	50.6227	17.9491	-32.6736	-46.3998	-3.12163	0.0729342
chr8	1654817	1655226	410	-56701	CLN8	ENSG00000182372	18.0268	40.3065	22.2797	48.1304	3.92743	0.058313	chr3	126721398	126722041	644	13960	PLXNA1	ENSG00000114554	49.2742	10.4563	-38.8179	-57.2882	-3.19454	0.0729342
chr8	1770754	1770991	238	-1150	ARHGEF10	ENSG00000104728	28.2223	48.6939	20.4715	11.0018	4.04441	0.057761	chr3	127494064	127494377	314	8473	MGLL	ENSG00000074416	35.347	14.2368	-21.1102	-25.4065	-3.0114	0.0618437
chr8	1815101	1815273	173	-15548	ARHGEF10	ENSG00000104728	57.9836	77.5975	19.6139	19.1122	3.21375	0.0715616	chr3	127778543	127779305	763	6940	SEC61A1	ENSG00000058262	73.7268	47.2308	-26.496	-59.4375	-3.20946	0.0634708
chr8	1951057	1951110	54	29012	KBTBD11	ENSG00000176595	34.761	55.0295	20.2684	30.3043	3.05708	0.0558941	chr3	128057642	128058201	560	127609	DNAJB8	ENSG00000179407	76.3969	56.4022	-19.9947	-38.5847	-3.19179	0.0593645
chr8	2078653	2079128	476	85468	MYOM2	ENSG00000036448	41.1302	66.0984	24.9682	21.5423	3.8603	0.0616661	chr3	128143309	128143794	486	42016	DNAJB8	ENSG00000179407	69.8011	49.1089	-20.6922	-52.5185	-3.1892	0.0563942
chr8	2544954	2545932	979	551769	MYOM2	ENSG00000036448	22.7978	47.1837	24.3858	70.0273	4.15031	0.0729746	chr3	128151140	128151436	297	34374	DNAJB8	ENSG00000179407	57.1606	33.3012	-23.8594	-72.452	-3.1859	0.0666613
chr8	4848034	4848439	406	3498	CSMD1	ENSG00000183117	41.9309	61.7642	19.8332	32.8855	3.56276	0.0556908	chr3	128418021	128418465	445	-18102	RPN1	ENSG00000163902	58.8487	37.4035	-21.4452	-37.5933	-3.14414	0.0576016
chr8	6407453	6408076	624	12488	ANGPT2	ENSG00000091879	35.3533	60.282	24.9287	102.785	4.15695	0.0742352	chr3	128996851	128997055	205	-615	HMCES	ENSG00000183624	69.7819	42.6851	-27.0968	-25.7445	-3.14944	0.0775874
chr8	8230382	8230840	459	8416	SGK223	ENSG00000182319	51.717	72.8435	21.1266	25.2875	3.25473	0.0597404	chr3	129157633	129157701	69	974	MBD4	ENSG00000129071	69.5507	50.0278	-19.5229	-12.3078	-3.0626	0.0578927
chr8	11446213	11446365	153	-88102	GATA4	ENSG00000136574	30.2179	47.3904	17.1725	9.08132	3.05225	0.0558067	chr3	129200809	129201087	279	2075	IFT122	ENSG00000163913	62.8263	40.6154	-22.2108	-21.354	-3.00587	0.0635122
chr8	11653166	11653507	342	83	FDFT1	ENSG00000079459	7.74092	28.3277	20.5868	58.1355	3.36038	0.0635766	chr3	129979444	129979908	465	-84450	COL6A5	ENSG00000172752	54.7818	34.0663	-20.7156	-25.5799	-3.00771	0.0579347
chr8	11722131	11722579	449	-2153	CTSB	ENSG00000164733	24.7739	43.5189	18.745	29.5327	4.03696	0.0589523	chr3	130614242	130614734	493	756	ATP2C1	ENSG00000017260	50.5601	23.1735	-27.3865	-23.1475	-3.53793	0.055931
chr8	12899045	12899588	544	74164	DLC1	ENSG00000164741	34.5504	59.2272	24.6768	17.0215	3.50159	0.0699879	chr3	133789368	133789702	335	-40447	SLCO2A1	ENSG00000174640	58.7487	37.4955	-21.2532	-53.2275	-3.11259	0.0552543
chr8	17016010	17017081	1072	1066	ZDHHC2	ENSG00000104219	62.2274	89.3135	27.0862	46.6924	4.18438	0.0666936	chr3	134033969	134034956	988	55797	AMOTL2	ENSG00000114019	84.7676	51.4967	-33.2709	-79.217	-3.4377	0.0659509
chr8	17207035	17207217	183	-37852	MTMR7	ENSG00000003987	49.5374	69.4159	19.8785	18.226	3.05333	0.0648039	chr3	140769274	140769624	351	-619	SPSB4	ENSG00000175093	55.278	34.8758	-20.4022	-38.6711	-3.0684	0.0632345
chr8	17644341	17645191	851	12985	MTUS1	ENSG00000129422	63.4271	81.7974	18.3703	41.8806	3.37064	0.0556908	chr3	141122201	141123116	916	540	ZBTB38	ENSG00000177311	71.943	41.5865	-30.3565	-72.0361	-3.18277	0.055098
chr8	19327162	19327515	354	131860	CSGALNACT1	ENSG00000147408	52.3141	74.9072	22.5931	19.3329	3.29147	0.0574738	chr3	141379609	141379866	258	-77179	RNF7	ENSG00000114125	50.3127	22.9567	-27.356	-27.1019	-3.43479	0.0614585
chr8	19465423	19466122	700	-5416	CSGALNACT1	ENSG00000147408	19.3722	48.1781	28.8059	29.447	4.36724	0.058159	chr3	142615493	142615560	68	-7447	PCOLCE2	ENSG00000163710	61.6935	40.203	-21.4906	-12.4869	-3.08524	0.0547234
chr8	22084739	22084799	61	406	PHYHIP	ENSG00000168490	17.648	35.8922	18.2441	12.2082	3.09123	0.0625388	chr3	142959788	142961019	1232	121614	CHST2	ENSG00000175040	58.9674	40.5021	-18.4653	-44.6747	-3.07974	0.0599908
chr8	22388847	22389752	906	-19455	SORBS3	ENSG00000120896	63.19	87.7771	24.5871	30.6209	4.8463	0.0562686	chr3	145879966	145880068	103	-1011	PLOD2	ENSG00000152952	41.8899	11.5895	-30.3004	-20.5493	-3.94057	0.0573762
chr8	22879509	22880480	972	-21995	PEBP4	ENSG00000134020	54.5009	76.3468	21.8459	79.0562	4.889	0.0623474	chr3	145969203	145969625	423	-236	PLSCR4	ENSG00000114698	77.6536	51.8022	-25.8514	-98.3706	-3.04652	0.0568314
chr8	23381064	23381227	164	-5090	SLC25A37	ENSG00000147454	15.7507	33.2221	17.4713	24.3848	3.07836	0.0589777	chr3	147663667	147664148	482	536495	ZIC1	ENSG00000152977	67.7746	51.7185	-16.0561	-22.2147	-3.53395	0.0592296
chr8	25936287	25936908	622	-33373	EBF2	ENSG00000221818	44.1477	65.3111	21.1634	45.7708	3.67468	0.0556908	chr3	149253482	149254233	752	39805	WWTR1	ENSG00000018408	61.9629	37.3871	-24.5758	-32.2864	-3.02259	0.0563541
chr8	26277367	26277582	216	29488	BNIP3L	ENSG00000104765	21.499	47.0459	25.5469	9.24156	3.10021	0.0686166	chr3	153838134	153838354	221	-437	ARHGEF26	ENSG00000114790	61.6253	36.7544	-24.8709	-16.9737	-3.02453	0.0579466
chr8	26471133	26472530	1398	35211	DPYSL2	ENSG00000092964	45.2019	73.1202	27.9183	105.951	5.63883	0.0643494	chr3	157502701	157503084	384	241467	C3orf55	ENSG00000174899	63.7161	49.9	-13.8161	-22.8905	-3.03251	0.0555609
chr8	26721306	26721766	461	726	ADRA1A	ENSG00000120907	13.7157	37.7175	24.0017	48.3147	3.43912	0.0715081	chr3	157825533	157826068	536	0	RSRC1	ENSG00000174891	31.4565	9.71426	-21.7422	-24.4616	-3.10641	0.0547234
chr8	27503543	27504573	1031	11844	SCARA3	ENSG00000168077	31.7909	52.9007	21.1098	70.6598	4.10543	0.0566493	chr3	160168149	160168579	431	-531	TRIM59	ENSG00000213186	56.0868	37.8487	-18.2381	-44.6536	-3.05852	0.0567822
chr8	27527393	27527865	473	35694	SCARA3	ENSG00000168077	32.5279	55.6793	23.1514	31.004	4.07507	0.0613576	chr3	167810989	167811633	645	1498	GOLIM4	ENSG00000173905	46.1651	21.6309	-24.5341	-37.1187	-3.40062	0.0568054
chr8	28491007	28491768	762	10760	EXTL3	ENSG00000012232	44.1041	64.6999	20.5958	58.185	3.60741	0.0556933	chr3	170625369	170625398	30	988	EIF5A2	ENSG00000163577	66.5055	49.3787	-17.1268	-9.55202	-3.15082	0.0567938
chr8	29938511	29938778	268	1161	TMEM66	ENSG00000133872	56.173	74.7417	18.5687	26.1666	3.35571	0.0609832	chr3	171579725	171581608	1884	18418	TMEM212	ENSG00000186329	64.9423	39.4538	-25.4884	-115.204	-3.12222	0.0561827
chr8	30505672	30505970	299	8551	GTF2E2	ENSG00000197265	60.2374	79.1934	18.956	9.47812	3.17587	0.0567812	chr3	171581981	171582087	107	20674	TMEM212	ENSG00000186329	72.5281	49.5436	-22.9846	-11.186	-3.59258	0.0547234
chr8	30588665	30589264	600	-3221	GSR	ENSG00000104687	34.1226	59.1301	25.0075	68.96	3.5682	0.0747387	chr3	171685721	171685931	211	-71486	FNDC3B	ENSG00000075420	54.119	36.1284	-17.9905	-25.7819	-3.14067	0.0564885
chr8	32404092	32404454	363	-1273	NRG1	ENSG00000157168	38.0259	63.2879	25.262	16.5828	4.65	0.0571145	chr3	173304549	173304713	165	1838	NLGN1	ENSG00000169760	68.5761	47.816	-20.7601	-14.0687	-3.2325	0.0594374
chr8	32624435	32624547	113	45071	NRG1	ENSG00000157168	60.9056	75.2047	14.2991	12.2045	3.07034	0.0557492	chr3	174485245	174485839	595	-91230	NAALADL2	ENSG00000177694	78.7763	57.2786	-21.4977	-28.1629	-3.0469	0.0547234
chr8	36641508	36641947	440	0	KCNU1	ENSG00000215262	26.419	49.9348	23.5158	46.7062	4.19371	0.0579987	chr3	176912374	176913052	679	1158	TBL1XR1	ENSG00000177565	65.7795	28.0994	-37.6801	-52.8246	-3.67951	0.0754746
chr8	37329557	37330497	941	-222771	ZNF703	ENSG00000183779	40.0482	62.318	22.2698	48.2241	3.59104	0.061928	chr3	176919547	176919898	352	-4285	TBL1XR1	ENSG00000177565	85.3734	64.1	-21.2734	-23.69	-3.20055	0.0586564
chr8	37373615	37374125	511	-179143	ZNF703	ENSG00000183779	27.1153	51.5794	24.4641	41.9922	3.4016	0.0715865	chr3	177062064	177062772	709	-146802	TBL1XR1	ENSG00000177565	73.0122	40.1171	-32.8951	-79.1504	-3.62167	0.064251
chr8	37424551	37425379	829	-127889	ZNF703	ENSG00000183779	40.3075	64.1673	23.8598	44.003	3.55094	0.0618446	chr3	177447830	177448447	618	-532568	TBL1XR1	ENSG00000177565	79.4291	57.8668	-21.5622	-53.1511	-3.1477	0.0579759
chr8	37548589	37549687	1099	-3581	ZNF703	ENSG00000183779	50.416	84.1334	33.7174	84.4921	5.35397	0.0686178	chr3	177611682	177612061	380	-378658	KCNMB2	ENSG00000197584	70.9486	48.427	-22.5216	-37.3394	-3.38409	0.0640468
chr8	37731225	37732229	1005	3405	RAB11FIP1	ENSG00000156675	53.1202	82.9046	29.7844	59.4018	4.6164	0.0700254	chr3	180320968	180321042	75	617	TTC14	ENSG00000163728	84.2136	63.69	-20.5236	-18.0456	-3.39931	0.0547234
chr8	38330056	38330597	542	-3703	FGFR1	ENSG00000077782	51.976	71.0904	19.1144	25.6376	3.3878	0.0557464	chr3	182513301	182513355	55	2009	ATP11B	ENSG00000058063	65.3787	37.7619	-27.6168	-13.321	-4.24663	0.0578709
chr8	38796490	38796989	500	-34693	HTRA4	ENSG00000169495	36.0505	53.915	17.8645	38.0561	3.26316	0.0561343	chr3	182931769	182932875	1107	-38156	B3GNT5	ENSG00000176597	64.0075	45.4072	-18.6002	-62.8051	-3.15698	0.056284
chr8	41557143	41557621	479	6075	ANK1	ENSG00000029534	48.285	68.9806	20.6956	22.3525	3.33513	0.0584678	chr3	182970507	182970614	108	-417	B3GNT5	ENSG00000176597	67.3829	50.8923	-16.4906	-9.37174	-3.05073	0.0567375
chr8	42154942	42155028	87	25351	IKBKB	ENSG00000104365	44.9667	65.3811	20.4144	12.0315	3.02294	0.069483	chr3	182972742	182972911	170	328	B3GNT5	ENSG00000176597	66.784	48.3096	-18.4744	-20.6874	-3.03183	0.054978
chr8	48522592	48523498	907	-48727	SPIDR	ENSG00000164808	50.5144	74.7313	24.2169	31.5038	4.18227	0.0566311	chr3	183145038	183145449	412	315	MCF2L2	ENSG00000053524	54.1807	35.6745	-18.5062	-54.7311	-3.28665	0.0547234
chr8	49174369	49174747	379	220061	UBE2V2	ENSG00000169139	27.9477	46.735	18.7873	13.3175	3.59023	0.0623064	chr3	183734374	183734819	446	412	ABCC5	ENSG00000114770	57.4291	34.6854	-22.7437	-24.4997	-3.1259	0.0582555
chr8	49559701	49559809	109	82538	EFCAB1	ENSG00000034239	49.2614	71.0616	21.8002	9.50207	3.2101	0.0686822	chr3	184056618	184057008	391	0	FAM131A	ENSG00000175182	40.3569	16.1635	-24.1934	-66.4945	-3.10324	0.0565515
chr8	49782065	49782466	402	51521	SNAI2	ENSG00000019549	43.4238	71.8447	28.4209	19.2724	4.31419	0.0598862	chr3	184300073	184300870	798	20500	EPHB3	ENSG00000182580	62.6788	36.7795	-25.8993	-65.2759	-3.00457	0.0724862
chr8	49783652	49783907	256	50080	SNAI2	ENSG00000019549	17.1632	57.5683	40.4051	46.4594	3.72482	0.0904437	chr3	184376256	184376773	518	53062	MAGEF1	ENSG00000177383	73.5221	52.204	-21.318	-26.0712	-3.00617	0.0719607
chr8	55016389	55016709	321	-1811	LYPLA1	ENSG00000120992	44.9981	66.1215	21.1234	38.2659	3.85446	0.0593477	chr3	184405091	184406299	1209	23536	MAGEF1	ENSG00000177383	66.2268	34.4589	-31.7679	-125.791	-3.08897	0.0612424
chr8	56791576	56791649	74	-722	LYN	ENSG00000254087	26.0613	49.6428	23.5815	13.2558	3.61244	0.0561608	chr3	184869019	184869592	574	1209	C3orf70	ENSG00000187068	67.5909	44.1596	-23.4312	-40.2139	-3.61079	0.0606987
chr8	57817338	57817523	186	88395	IMPAD1	ENSG00000104331	52.9132	75.1339	22.2207	15.1768	3.0403	0.0557526	chr3	184871381	184871649	269	-578	C3orf70	ENSG00000187068	38.9881	22.5952	-16.3929	-75.5158	-3.0045	0.0599983
chr8	59587696	59588003	308	-15292	NSMAF	ENSG00000035681	34.3401	54.8947	20.5547	13.1053	3.33746	0.0624911	chr3	184971322	184971441	120	377	EHHADH	ENSG00000113790	52.0161	35.4235	-16.5926	-14.3989	-3.27889	0.0559027
chr8	59927173	59927808	636	103958	TOX	ENSG00000198846	46.2888	64.9957	18.7069	15.1543	3.06373	0.0611602	chr3	185215519	185215700	182	1074	TMEM41A	ENSG00000163900	59.146	42.6328	-16.5132	-17.7046	-3.13489	0.0547234
chr8	61763401	61763938	538	109408	CHD7	ENSG00000171316	49.7253	74.8376	25.1123	15.8507	3.27835	0.0689923	chr3	185348143	185348367	225	16999	SENP2	ENSG00000163904	60.2361	39.1763	-21.0598	-12.4983	-3.03781	0.0575011
chr8	61824201	61824369	169	-145347	CLVS1	ENSG00000177182	17.8968	41.126	23.2293	13.6578	3.78807	0.0611965	chr3	186078023	186078419	397	1326	DGKG	ENSG00000058866	71.8106	50.3116	-21.4989	-31.8343	-3.09149	0.0565186
chr8	71156992	71157861	870	0	NCOA2	ENSG00000140396	32.0292	57.4622	25.433	38.1839	3.21744	0.0650841	chr3	187085892	187087340	1449	0	RTP4	ENSG00000136514	50.2461	32.8184	-17.4277	-53.5993	-3.00753	0.0625845
chr8	72757924	72758701	778	-1220	MSC	ENSG00000178860	41.0387	75.6236	34.5849	56.8488	3.50663	0.0806205	chr3	187926335	187926825	491	348	LPP	ENSG00000145012	72.9866	50.2594	-22.7272	-25.625	-3.08945	0.058567
chr8	74004343	74004855	513	651	SBSPON	ENSG00000164764	20.3161	40.9026	20.5865	42.8344	4.8721	0.0614487	chr3	190040828	190041125	298	-563	CLDN1	ENSG00000163347	66.3136	46.0307	-20.283	-24.0821	-3.24687	0.061745
chr8	80678683	80679168	486	0	HEY1	ENSG00000164683	34.811	63.7516	28.9406	49.858	4.99891	0.0606246	chr3	193497797	193497891	95	112831	OPA1	ENSG00000198836	41.9996	25.6761	-16.3235	-15.177	-3.02595	0.0565336
chr8	80698803	80698858	56	-18704	HEY1	ENSG00000164683	67.9572	89.4134	21.4561	9.04412	3.03278	0.0643386	chr3	193800811	193801289	479	-52644	HES1	ENSG00000114315	68.8851	48.4718	-20.4133	-45.1172	-3.0552	0.0657529
chr8	80792456	80793252	797	-112357	HEY1	ENSG00000164683	28.2746	55.721	27.4464	82.3993	3.73864	0.0725315	chr3	193985181	193986159	979	85887	CPN2	ENSG00000178772	80.0912	46.6255	-33.4656	-127.442	-3.13285	0.0762841
chr8	89311387	89311738	352	27978	MMP16	ENSG00000156103	35.1888	54.3343	19.1455	20.3732	3.64	0.0559874	chr3	194597187	194598061	875	190564	FAM43A	ENSG00000185112	50.9263	27.234	-23.6923	-58.2642	-3.01421	0.0699604
chr8	89312611	89313017	407	26699	MMP16	ENSG00000156103	35.1137	58.6154	23.5017	29.2937	4.21038	0.0559874	chr3	195143576	195144306	731	19277	ACAP2	ENSG00000114331	68.1398	47.5077	-20.6321	-39.0395	-3.03606	0.0548766
chr8	94678705	94679179	475	-31609	FAM92A1	ENSG00000188343	53.6833	75.2664	21.5831	30.6585	3.0969	0.0558327	chr3	195387514	195387552	39	-60200	MUC20	ENSG00000176945	93.3651	68.2525	-25.1126	-14.2469	-3.55224	0.0606294
chr8	94710694	94711404	711	0	FAM92A1	ENSG00000188343	58.7448	87.3102	28.5655	52.4258	4.974	0.0598289	chr3	195946793	195946946	154	2029	SLC51A	ENSG00000163959	59.1773	38.5261	-20.6512	-26.3688	-3.08601	0.0612965
chr8	94933329	94934046	718	1221	PDP1	ENSG00000164951	46.6587	64.8235	18.1648	22.7409	3.53283	0.0584798	chr3	196166978	196167585	608	-7632	UBXN7	ENSG00000163960	72.5326	51.2473	-21.2853	-32.1453	-3.07731	0.0563275
chr8	95467285	95467351	67	12890	RAD54B	ENSG00000197275	61.216	81.6354	20.4195	9.56365	3.29694	0.061264	chr3	196594130	196594244	115	-482	SENP5	ENSG00000119231	44.8161	22.263	-22.5532	-10.1892	-3.02607	0.0582977
chr8	97161322	97162149	828	10870	GDF6	ENSG00000156466	35.4233	76.7177	41.2944	56.2289	3.79415	0.0701787	chr3	196675941	196676649	709	2151	PIGZ	ENSG00000119227	48.8221	26.4737	-22.3484	-61.5622	-3.04384	0.0565394
chr8	97165566	97166546	981	6473	GDF6	ENSG00000156466	15.5726	50.9096	35.3369	213.696	4.61486	0.058608	chr3	196762411	196763256	846	-5723	MFI2	ENSG00000163975	50.6837	28.8739	-21.8098	-41.7506	-3.09398	0.0636656
chr8	97167062	97167205	144	5814	GDF6	ENSG00000156466	8.84778	38.1065	29.2588	30.3235	3.05774	0.0563768	chr3	197023312	197023570	259	504	DLG1	ENSG00000075711	55.5265	33.537	-21.9895	-10.5332	-3.06472	0.0585203
chr8	97167500	97168493	994	4526	GDF6	ENSG00000156466	19.2057	58.8865	39.6808	126.146	5.98966	0.0569949	chr3	197066895	197067202	308	-40723	DLG1	ENSG00000075711	72.9032	57.0222	-15.881	-18.6268	-3.00662	0.0585162
chr8	97169174	97169371	198	3648	GDF6	ENSG00000156466	31.9648	65.6096	33.6448	27.0895	4.2586	0.0569949	chr3	197104975	197105737	763	-78803	DLG1	ENSG00000075711	54.9349	34.0501	-20.8848	-112.263	-3.05253	0.0646154
chr8	97340959	97341030	72	33538	PTDSS1	ENSG00000156471	60.2269	77.7281	17.5013	9.17099	3.06391	0.0559036	chr3	197328020	197328572	553	-27825	BDH1	ENSG00000161267	55.0654	20.4632	-34.6022	-59.6664	-3.6306	0.0707079
chr8	98289451	98289557	107	618	TSPYL5	ENSG00000180543	49.6981	70.9734	21.2753	25.3532	3.83519	0.0572902	chr3	197519237	197519435	199	1086	LRCH3	ENSG00000186001	63.7985	40.0611	-23.7374	-29.1114	-3.14973	0.0667123
chr8	99385876	99386069	194	-53180	KCNS2	ENSG00000156486	51.3876	75.5774	24.1898	9.16009	3.07014	0.0626785	chr4	839528	840032	505	-19541	CPLX1	ENSG00000168993	68.752	38.2137	-30.5383	-86.0757	-3.14097	0.0587446
chr8	103245211	103245457	247	5545	RRM2B	ENSG00000048392	41.8977	62.9729	21.0752	22.6998	3.39616	0.0597514	chr4	909248	909785	538	0	GAK	ENSG00000178950	71.9895	50.0176	-21.9718	-37.6644	-3.00267	0.057044
chr8	103809732	103810057	326	60272	AZIN1	ENSG00000155096	64.4754	81.459	16.9835	21.9985	3.19377	0.059337	chr4	1041293	1041497	205	35053	FGFRL1	ENSG00000127418	68.2623	49.3209	-18.9414	-29.9723	-3.18309	0.057044
chr8	106333499	106333653	155	1727	ZFPM2	ENSG00000169946	26.1617	53.4201	27.2584	9.05743	3.03677	0.0619928	chr4	1161497	1161863	367	4797	SPON2	ENSG00000159674	34.2859	15.3563	-18.9296	-73.7804	-3.00209	0.0601868
chr8	117301687	117302959	1273	465063	EIF3H	ENSG00000147677	46.1552	70.3266	24.1714	67.5888	4.37894	0.0559076	chr4	1167576	1167759	184	-576	SPON2	ENSG00000159674	47.5228	28.3952	-19.1276	-16.2821	-3.08175	0.0618944
chr8	117303426	117303941	516	464081	EIF3H	ENSG00000147677	49.993	73.0686	23.0756	15.1898	4.11082	0.0559076	chr4	1203104	1203168	65	-469	SPON2	ENSG00000159674	63.6618	45.0755	-18.5863	-18.0387	-3.00006	0.0622383
chr8	118875541	118875839	299	246813	EXT1	ENSG00000182197	34.8049	55.204	20.3991	15.307	3.0851	0.0678648	chr4	1282777	1282838	62	-800	MAEA	ENSG00000090316	56.9453	35.8742	-21.0711	-16.9713	-3.14946	0.0578399
chr8	119633130	119633345	216	838	SAMD12	ENSG00000177570	45.1808	62.5077	17.3269	12.4675	3.19663	0.0600509	chr4	1313170	1313224	55	9594	MAEA	ENSG00000090316	79.8079	58.7172	-21.0907	-9.65551	-3.16988	0.0585274
chr8	125617075	125618035	961	-35992	MTSS1	ENSG00000170873	46.4634	68.7719	22.3084	97.0076	4.18939	0.0561208	chr4	2069431	2069669	239	7891	NAT8L	ENSG00000185818	72.4389	55.2186	-17.2203	-28.3204	-3.00102	0.0579807
chr8	128520130	128520582	453	92272	POU5F1B	ENSG00000212993	36.2458	56.1564	19.9106	15.4073	3.13668	0.0776714	chr4	2262153	2262318	166	1702	MXD4	ENSG00000123933	47.3849	27.5597	-19.8252	-25.4106	-3.05342	0.057044
chr8	128840428	128840806	379	91950	MYC	ENSG00000136997	56.271	73.4241	17.1531	12.3993	3.15825	0.0567822	chr4	2561302	2561586	285	-65401	FAM193A	ENSG00000125386	80.4388	57.5068	-22.932	-42.2571	-3.03133	0.0620989
chr8	129025885	129026858	974	-65293	TMEM75	ENSG00000256655	68.106	88.5409	20.4349	52.738	3.72648	0.0566532	chr4	2691123	2691931	809	34974	FAM193A	ENSG00000125386	80.3051	56.999	-23.3061	-87.1011	-3.14829	0.0591629
chr8	129118006	129118547	542	-157414	TMEM75	ENSG00000256655	66.5156	88.7375	22.2219	32.9712	4.09579	0.0584981	chr4	2715853	2716643	791	41414	TNIP2	ENSG00000168884	82.5251	58.372	-24.1531	-43.9923	-3.10756	0.0618008
chr8	131532683	131533134	452	-76776	ASAP1	ENSG00000153317	41.382	62.7764	21.3944	16.8845	3.54746	0.0583982	chr4	2765367	2765456	90	-7263	TNIP2	ENSG00000168884	67.8046	50.7405	-17.064	-12.2676	-3.01323	0.057044
chr8	133688730	133688842	113	-891	LRRC6	ENSG00000129295	25.2433	48.7	23.4567	9.97772	3.42476	0.0614884	chr4	2819349	2819475	127	-436	SH3BP2	ENSG00000087266	69.3637	48.4939	-20.8698	-14.0959	-3.29124	0.0570666
chr8	135631558	135632243	686	19879	ZFAT	ENSG00000066827	54.6181	81.7328	27.1147	42.3484	4.52467	0.061137	chr4	2960128	2960733	606	4326	NOP14	ENSG00000087269	71.1597	44.6636	-26.4961	-43.0952	-3.06897	0.0656001
chr8	141047392	141047630	239	103975	C8orf17	ENSG00000250733	39.361	61.1617	21.8008	12.3087	3.11032	0.0565787	chr4	3012478	3012719	242	46889	GRK4	ENSG00000125388	76.8459	59.8301	-17.0158	-10.0462	-3.14003	0.057044
chr8	141294468	141294997	530	166031	TRAPPC9	ENSG00000167632	47.4519	70.8544	23.4025	26.1305	4.02376	0.0607994	chr4	3300896	3301265	370	-9496	RGS12	ENSG00000159788	82.5217	66.1504	-16.3713	-9.78658	-3.03588	0.0570522
chr8	141616147	141616819	673	-159	AGO2	ENSG00000123908	26.6089	47.0241	20.4152	38.9376	3.87046	0.0620508	chr4	3373405	3373473	69	1798	RGS12	ENSG00000159788	59.7336	29.7571	-29.9765	-9.05504	-3.00291	0.10298
chr8	141628755	141629311	557	-12767	AGO2	ENSG00000123908	55.4849	75.0978	19.6128	43.4448	4.05566	0.0623651	chr4	3417250	3417677	428	-25936	HGFAC	ENSG00000109758	87.7161	68.5455	-19.1706	-75.4182	-3.02225	0.0634051
chr8	142363368	142363537	170	13829	GPR20	ENSG00000204882	33.491	54.7663	21.2753	24.9319	3.16154	0.0628513	chr4	3468150	3468291	142	3111	DOK7	ENSG00000175920	73.191	55.6319	-17.559	-27.4629	-3.02717	0.0577609
chr8	142368481	142368700	220	8666	GPR20	ENSG00000204882	50.6303	74.6266	23.9963	30.8333	3.96907	0.0610819	chr4	3639301	3639736	436	60704	LINC00955	ENSG00000216560	48.4438	26.9664	-21.4774	-47.1331	-3.06026	0.0640105
chr8	144344359	144344999	641	-4607	GLI4	ENSG00000250571	45.3005	75.6186	30.3182	120.059	5.40027	0.0631548	chr4	3786404	3786719	316	18278	ADRA2C	ENSG00000184160	40.5858	21.7027	-18.8831	-38.2389	-3.03283	0.0575415
chr8	145636012	145636273	262	-1258	CPSF1	ENSG00000071894	40.1759	65.0549	24.879	14.6234	3.8884	0.0606204	chr4	4389993	4390637	645	1160	NSG1	ENSG00000168824	58.8882	30.633	-28.2552	-61.9912	-3.1251	0.0644449
chr9	4160039	4160727	689	-7855	GLIS3	ENSG00000107249	51.1091	73.5754	22.4663	51.3603	3.84891	0.0550474	chr4	4679342	4680238	897	-135268	STX18	ENSG00000168818	54.9791	29.0298	-25.9493	-85.5809	-3.27946	0.0673587
chr9	4489475	4489502	28	-941	SLC1A1	ENSG00000106688	26.9687	43.4017	16.4329	9.32264	3.20702	0.0552758	chr4	4689612	4690669	1058	-145538	STX18	ENSG00000168818	75.766	46.5626	-29.2034	-105.809	-3.0093	0.0712939
chr9	4663312	4663640	329	1013	PPAPDC2	ENSG00000205808	48.0506	67.2859	19.2352	9.64615	3.37238	0.0570911	chr4	4765744	4766153	410	-95239	MSX1	ENSG00000163132	81.6034	54.0416	-27.5619	-29.525	-3.13294	0.0657301
chr9	6711679	6712515	837	-8347	KDM4C	ENSG00000107077	47.8497	66.8631	19.0134	41.762	3.35128	0.0539576	chr4	4854180	4854551	372	-6841	MSX1	ENSG00000163132	45.8008	25.2596	-20.5413	-55.0096	-3.01229	0.057488
chr9	12816887	12817263	377	41866	LURAP1L	ENSG00000153714	47.5382	68.4162	20.878	25.079	3.77097	0.0554115	chr4	4992198	4993592	1395	27571	CYTL1	ENSG00000170891	65.5357	34.5904	-30.9454	-173.4	-3.15446	0.0577993
chr9	12817766	12818078	313	42745	LURAP1L	ENSG00000153714	48.4557	70.3982	21.9425	34.177	3.93275	0.0554115	chr4	5640545	5640628	84	69665	EVC2	ENSG00000173040	72.8274	48.4517	-24.3757	-9.10511	-3.03134	0.0656289
chr9	14321190	14321346	157	990	NFIB	ENSG00000147862	9.78123	35.1519	25.3707	18.9664	3.18731	0.0705364	chr4	5788135	5788515	381	75192	EVC	ENSG00000072840	69.3828	39.8921	-29.4907	-34.2015	-3.0219	0.0678953
chr9	14351960	14352713	754	-29622	NFIB	ENSG00000147862	41.8706	65.1518	23.2812	54.7479	3.8092	0.0636559	chr4	5828635	5829370	736	60837	CRMP1	ENSG00000072832	81.2735	55.4281	-25.8454	-51.2664	-3.19887	0.0576481
chr9	16479525	16480085	561	-43154	BNC2	ENSG00000173068	74.8905	92.2318	17.3412	15.9406	4.39173	0.0566998	chr4	5865175	5865335	161	24872	CRMP1	ENSG00000072832	64.6823	51.2302	-13.4521	-13.0184	-3.04777	0.0621191
chr9	16672581	16673010	430	32069	BNC2	ENSG00000173068	58.2205	77.9659	19.7454	25.3681	3.87381	0.0566462	chr4	6955477	6955698	222	-248	TBC1D14	ENSG00000132405	43.981	20.571	-23.41	-43.4683	-3.13154	0.0692416
chr9	21556578	21557015	438	-74265	IFNE	ENSG00000184995	31.989	56.7364	24.7474	14.3802	3.70003	0.0545285	chr4	7127317	7127644	328	-57392	GRPEL1	ENSG00000109519	67.7256	47.9957	-19.73	-45.9132	-3.0198	0.0628984
chr9	21993628	21993720	93	689	CDKN2A	ENSG00000147889	43.8309	72.5704	28.7395	21.261	3.06173	0.0628902	chr4	7136333	7137713	1381	-56551	SORCS2	ENSG00000184985	53.9445	21.7286	-32.2159	-182.092	-3.66908	0.0578455
chr9	26493833	26494166	334	398198	CAAP1	ENSG00000120159	49.7877	75.2929	25.5052	19.9182	5.17695	0.0601053	chr4	7157123	7157791	669	-36473	SORCS2	ENSG00000184985	57.9048	29.8168	-28.088	-82.296	-3.28903	0.0899494
chr9	27608522	27608680	159	-34657	C9orf72	ENSG00000147894	28.7167	58.0291	29.3124	12.7284	4.45608	0.0624529	chr4	7256242	7256662	421	61976	SORCS2	ENSG00000184985	64.0895	42.5438	-21.5457	-25.7238	-3.05501	0.0688868
chr9	27608987	27610182	1196	-35122	C9orf72	ENSG00000147894	25.2531	56.0879	30.8348	62.8878	4.78757	0.0625209	chr4	7335272	7335367	96	-48257	SORCS2	ENSG00000184985	69.8565	47.9238	-21.9327	-12.1731	-3.01103	0.0611514
chr9	33077074	33077130	57	-408	SMU1	ENSG00000122692	28.087	48.136	20.049	19.9233	3.45029	0.0655667	chr4	7394625	7395488	864	10999	SORCS2	ENSG00000184985	59.5104	30.1545	-29.3559	-140.288	-3.20776	0.0675278
chr9	33511587	33511761	175	-12630	ANKRD18B	ENSG00000230453	40.2499	63.2756	23.0258	22.0772	4.02697	0.0606384	chr4	7509046	7509821	776	-72345	PSAPL1	ENSG00000178597	74.661	53.561	-21.1	-92.9464	-3.03952	0.0581893
chr9	34621344	34621668	325	-828	DCTN3	ENSG00000137100	45.8512	71.7488	25.8976	18.3541	4.80175	0.0549779	chr4	7589240	7590169	930	-145837	SORCS2	ENSG00000184985	58.9268	29.9858	-28.941	-105.514	-3.0895	0.0655134
chr9	34647503	34647775	273	842	GALT	ENSG00000213930	35.8971	53.9586	18.0614	16.2086	3.61286	0.0573794	chr4	7774496	7775134	639	38488	SORCS2	ENSG00000184985	67.2106	38.5202	-28.6904	-147.67	-3.02459	0.057044
chr9	34664483	34664629	147	1395	RP11-195F19.5	ENSG00000187186	30.1725	47.7477	17.5751	10.3691	3.46878	0.054269	chr4	8184708	8185420	713	905	SH3TC1	ENSG00000125089	50.7639	30.0527	-20.7112	-94.4612	-3.06184	0.0576093
chr9	35097115	35097135	21	-535	PIGO	ENSG00000165282	52.7474	68.528	15.7806	12.8278	3.27433	0.0540331	chr4	8186987	8187922	936	3184	SH3TC1	ENSG00000125089	40.4933	22.9915	-17.5018	-90.8181	-3.07754	0.0583063
chr9	35617584	35617860	277	506	CD72	ENSG00000137101	33.5842	56.2516	22.6674	29.5125	4.10652	0.0580155	chr4	8193165	8193236	72	-7854	SH3TC1	ENSG00000125089	83.0365	64.7787	-18.2577	-9.06241	-3.00175	0.0712484
chr9	35914445	35914515	71	8255	HRCT1	ENSG00000196196	65.4631	84.9576	19.4945	9.73967	3.4275	0.0579077	chr4	8396381	8396610	230	33577	ACOX3	ENSG00000087008	72.0884	48.4934	-23.595	-31.9417	-3.13663	0.0636997
chr9	36297394	36297482	89	-20340	GNE	ENSG00000159921	46.3071	61.572	15.2649	12.0754	3.02173	0.0538623	chr4	8410866	8411247	382	18940	ACOX3	ENSG00000087008	75.5443	55.0695	-20.4748	-22.3444	-3.02334	0.0595835
chr9	37003563	37003603	41	-813	PAX5	ENSG00000196092	45.9355	66.6919	20.7564	9.28177	3.11374	0.0595018	chr4	8900729	8901183	455	-27185	HMX1	ENSG00000215612	41.2103	22.3379	-18.8724	-31.482	-3.00755	0.0622834
chr9	38038625	38038882	258	30325	SHB	ENSG00000107338	37.5615	57.7333	20.1718	15.6974	3.19398	0.0631191	chr4	9500298	9500525	228	54037	DEFB131	ENSG00000186146	47.9677	23.5781	-24.3896	-40.0855	-3.02037	0.0724457
chr9	38066113	38066930	818	2277	SHB	ENSG00000107338	38.6152	66.9604	28.3452	40.88	4.85361	0.0566041	chr4	10094186	10094495	310	23467	WDR1	ENSG00000071127	74.0442	50.4998	-23.5444	-35.9175	-3.11621	0.0571065
chr9	38487603	38488016	414	-63158	IGFBPL1	ENSG00000137142	48.5376	70.6233	22.0857	126.468	3.96988	0.0554981	chr4	10119636	10119959	324	-1062	WDR1	ENSG00000071127	66.584	39.043	-27.541	-34.3901	-3.02096	0.0634053
chr9	44990617	44990693	77	302	FAM27C	ENSG00000154537	9.20012	48.5914	39.3913	16.6932	3.94246	0.101978	chr4	13483924	13484733	810	1255	RAB28	ENSG00000157869	56.1317	26.2866	-29.8451	-42.0831	-3.31072	0.0595135
chr9	68725475	68725524	50	476679	FOXD4L6	ENSG00000204793	35.3391	59.514	24.1749	15.3469	3.86134	0.0649138	chr4	16232948	16233126	179	-4783	TAPT1	ENSG00000169762	88.1698	66.0988	-22.071	-13.1162	-3.1316	0.0592147
chr9	71726801	71727031	231	-9192	TJP2	ENSG00000119139	50.5387	77.7629	27.2242	21.066	3.59096	0.073344	chr4	16233452	16233741	290	-5287	TAPT1	ENSG00000169762	82.7805	59.8	-22.9806	-13.9489	-3.07553	0.0592147
chr9	71739898	71739978	81	3673	TJP2	ENSG00000119139	44.2238	70.9455	26.7217	18.2983	3.05266	0.0997602	chr4	16654071	16654481	411	21454	LDB2	ENSG00000169744	74.991	52.822	-22.169	-33.9454	-3.0072	0.0696772
chr9	72586870	72587509	640	-70987	MAMDC2	ENSG00000165072	37.0697	59.5652	22.4956	29.7975	3.5654	0.0621842	chr4	17414367	17414641	275	98962	QDPR	ENSG00000151552	50.9633	32.2798	-18.6835	-16.8712	-3.26148	0.065295
chr9	77701327	77701982	656	1123	NMRK1	ENSG00000106733	51.503	68.9243	17.4213	48.8287	4.30873	0.0549478	chr4	24586591	24586698	108	-417	DHX15	ENSG00000109606	63.1772	44.2842	-18.893	-37.8352	-3.19335	0.0573602
chr9	80270959	80271088	130	-7735	GNA14	ENSG00000156049	64.5158	83.0542	18.5383	10.4286	3.50695	0.0553213	chr4	25818847	25819218	372	-38021	SEL1L3	ENSG00000091490	69.7857	48.2188	-21.5669	-25.0808	-3.02291	0.05909
chr9	80986992	80987074	83	74932	PSAT1	ENSG00000135069	54.16	69.4104	15.2503	12.4378	3.14644	0.0546776	chr4	26839299	26839399	101	-19900	STIM2	ENSG00000109689	59.0742	45.1183	-13.9559	-9.54744	-3.13812	0.0586664
chr9	84203031	84203726	696	24710	TLE1	ENSG00000196781	52.4522	71.0179	18.5657	58.0626	4.00936	0.0574781	chr4	26839819	26840363	545	-18936	STIM2	ENSG00000109689	60.605	45.8228	-14.7821	-26.6276	-3.19871	0.0586664
chr9	84441435	84441951	517	-137214	TLE1	ENSG00000196781	62.5049	89.2023	26.6974	65.1486	3.55468	0.0588659	chr4	26861261	26861607	347	-705	STIM2	ENSG00000109689	64.5264	44.3538	-20.1726	-20.8442	-3.20099	0.0593847
chr9	84442253	84442555	303	-138032	TLE1	ENSG00000196781	60.7645	86.4268	25.6623	9.93089	3.46108	0.0588659	chr4	30724711	30726305	1595	733	PCDH7	ENSG00000169851	38.4566	11.7049	-26.7518	-138.079	-3.0701	0.0699321
chr9	86264449	86264655	207	19550	UBQLN1	ENSG00000135018	49.1648	72.3285	23.1637	14.5543	3.72908	0.0583138	chr4	37686523	37686663	141	1334	RELL1	ENSG00000181826	58.0534	36.873	-21.1804	-10.9018	-3.43926	0.0573462
chr9	87281896	87282130	235	-1335	NTRK2	ENSG00000148053	38.1339	65.1789	27.045	12.4649	4.31817	0.0564791	chr4	37891211	37891504	294	-1203	TBC1D1	ENSG00000065882	45.1922	24.7076	-20.4847	-23.7682	-3.55504	0.0573293
chr9	88419213	88419378	166	-62268	AGTPBP1	ENSG00000135049	21.1024	44.9864	23.8841	20.0448	4.11073	0.0553417	chr4	37910129	37911180	1052	17408	TBC1D1	ENSG00000065882	71.0845	52.7305	-18.354	-96.1269	-3.05497	0.0607784
chr9	90704989	90705657	669	-115320	CDK20	ENSG00000156345	50.3323	74.2265	23.8941	40.4007	3.62893	0.0639594	chr4	37911566	37911602	37	18845	TBC1D1	ENSG00000065882	71.8045	57.5025	-14.302	-9.20811	-3.04236	0.0603505
chr9	91608098	91608889	792	1735	S1PR3	ENSG00000213694	24.4463	51.0963	26.6501	33.9476	3.70708	0.0742555	chr4	38237514	38237822	309	190021	TBC1D1	ENSG00000065882	59.8148	35.5269	-24.2879	-30.4977	-3.03231	0.0729136
chr9	94649670	94650112	443	61049	ROR2	ENSG00000169071	59.759	73.1564	13.3974	18.2211	3.04811	0.0697107	chr4	38664218	38664394	177	-1422	KLF3	ENSG00000109787	57.0978	35.9069	-21.1909	-45.3719	-3.18407	0.0591249
chr9	94668390	94668779	390	42382	ROR2	ENSG00000169071	60.4678	80.5666	20.0987	40.9368	3.56474	0.0594641	chr4	38761122	38761335	214	16481	TLR10	ENSG00000174123	52.1766	32.124	-20.0526	-25.7856	-3.21297	0.057044
chr9	95997514	95997805	292	308	WNK2	ENSG00000165238	39.5604	56.5214	16.961	28.43	3.24435	0.0594114	chr4	39047880	39048148	269	1199	KLHL5	ENSG00000109790	81.3496	54.0027	-27.3469	-25.1581	-3.05046	0.0756396
chr9	97734220	97734844	625	15991	C9orf3	ENSG00000148120	66.7004	84.199	17.4986	48.4683	3.30721	0.0536673	chr4	39183215	39183231	17	-792	WDR19	ENSG00000157796	72.2439	53.2082	-19.0357	-9.3228	-3.07111	0.0624577
chr9	98342679	98343571	893	-63339	PTCH1	ENSG00000185920	39.571	61.4982	21.9271	48.0265	3.73575	0.0566749	chr4	39487509	39487962	454	26816	LIAS	ENSG00000121897	72.9893	54.464	-18.5253	-24.9376	-3.01538	0.0577261
chr9	98835483	98836086	604	100363	ERCC6L2	ENSG00000182150	48.8819	72.5944	23.7126	62.3487	4.97133	0.0546346	chr4	39543969	39545415	1447	-14037	UGDH	ENSG00000109814	72.5717	49.2681	-23.3036	-55.1105	-3.02767	0.0595521
chr9	98836406	98837037	632	101286	ERCC6L2	ENSG00000182150	43.4291	66.505	23.0759	44.566	4.90025	0.0546004	chr4	40889701	40889900	200	2541	APBB2	ENSG00000163697	82.7194	60.9897	-21.7297	-16.8545	-3.24844	0.057044
chr9	98978871	98979319	449	85066	HSD17B3	ENSG00000130948	37.66	59.1323	21.4723	25.1453	3.7723	0.0543708	chr4	41014802	41015997	1196	404	APBB2	ENSG00000163697	72.4436	48.5236	-23.92	-70.3213	-3.04939	0.0580576
chr9	101369505	101369654	150	101824	GABBR2	ENSG00000136928	49.3813	66.039	16.6577	32.2743	4.51539	0.0722362	chr4	48101967	48102236	270	14325	TXK	ENSG00000074966	80.9175	64.4621	-16.4554	-25.0244	-3.03604	0.0633619
chr9	101370111	101370723	613	100755	GABBR2	ENSG00000136928	25.2148	44.1579	18.9431	44.0388	4.78017	0.0696264	chr4	54316166	54316724	559	21932	FIP1L1	ENSG00000145216	74.5517	54.1079	-20.4438	-12.8196	-3.12823	0.0574024
chr9	102121742	102122121	380	137158	SEC61B	ENSG00000106803	47.5219	67.5665	20.0446	27.4366	3.07254	0.0582639	chr4	55143269	55143692	424	33526	PDGFRA	ENSG00000134853	58.3177	35.3703	-22.9474	-50.2741	-3.01162	0.0680855
chr9	102857950	102858672	723	2649	ERP44	ENSG00000023318	50.5836	78.2064	27.6228	35.0368	4.48706	0.0592416	chr4	56264117	56264524	408	1986	TMEM165	ENSG00000134851	49.5089	27.6345	-21.8745	-33.7311	-3.04037	0.0572137
chr9	108161043	108161317	275	43285	SLC44A1	ENSG00000070214	44.8512	69.097	24.2458	36.0413	4.08432	0.0617968	chr4	57371102	57371205	104	-303	ARL9	ENSG00000196503	62.4295	44.1924	-18.2371	-18.5598	-3.0531	0.0604619
chr9	114364161	114364745	585	-2025	PTGR1	ENSG00000106853	53.4162	72.8728	19.4566	30.8074	4.15379	0.0545657	chr4	57687158	57687310	153	549	SPINK2	ENSG00000128040	62.5099	38.7318	-23.7781	-30.7056	-3.6209	0.0614296
chr9	116160550	116160969	420	-867	ALAD	ENSG00000148218	56.446	77.1755	20.7295	18.0573	3.90707	0.058607	chr4	57975329	57975465	137	1085	IGFBP7	ENSG00000163453	64.9341	34.493	-30.4411	-19.6226	-3.09484	0.078208
chr9	116368042	116369054	1013	12275	RGS3	ENSG00000138835	40.7373	64.8285	24.0913	60.9971	4.75031	0.0621725	chr4	71572178	71572215	38	1659	RUFY3	ENSG00000018189	60.1337	36.6255	-23.5083	-11.0869	-3.54234	0.0594546
chr9	116765948	116766163	216	71085	AMBP	ENSG00000106927	52.7309	73.3417	20.6108	15.8582	3.20532	0.0586937	chr4	74534923	74535363	441	-48574	RASSF6	ENSG00000169435	45.0631	24.8522	-20.2109	-28.153	-3.01257	0.0664449
chr9	123197656	123197964	309	12385	CDK5RAP2	ENSG00000136861	40.6137	69.8643	29.2506	14.6404	3.74775	0.0594688	chr4	74735540	74735924	385	418	CXCL1	ENSG00000163739	66.6948	39.254	-27.4408	-50.2769	-3.10976	0.0575158
chr9	123198416	123199125	710	11224	CDK5RAP2	ENSG00000136861	42.1785	70.8831	28.7047	42.9936	3.79387	0.0598523	chr4	75860443	75860678	236	2116	PARM1	ENSG00000169116	48.1712	22.6587	-25.5125	-21.7289	-3.49452	0.0603576
chr9	123334132	123334381	250	8054	CDK5RAP2	ENSG00000136861	65.7943	84.5532	18.7589	9.85085	3.34457	0.0553851	chr4	76932922	76933284	363	0	ART3	ENSG00000156219	42.9379	23.6822	-19.2556	-27.8177	-3.07667	0.0645177
chr9	123660417	123660782	366	16067	TRAF1	ENSG00000056558	49.0376	73.5705	24.533	33.0494	4.16923	0.0580287	chr4	77504941	77506027	1087	148687	SHROOM3	ENSG00000138771	87.5625	57.4874	-30.0751	-71.6841	-3.01109	0.0623616
chr9	123661119	123661463	345	15386	TRAF1	ENSG00000056558	54.1581	77.7941	23.6361	28.1962	3.91184	0.0581669	chr4	77722955	77723115	161	95886	SOWAHB	ENSG00000186212	71.5873	37.5609	-34.0263	-30.3123	-3.00089	0.100714
chr9	124587471	124588054	584	82406	DAB2IP	ENSG00000136848	53.7126	76.9387	23.2261	42.979	3.77496	0.0560512	chr4	77815654	77816070	417	2931	SOWAHB	ENSG00000186212	63.299	41.9187	-21.3803	-16.0699	-3.05202	0.0631856
chr9	124888391	124888412	22	-32505	TTLL11	ENSG00000175764	23.4019	42.8661	19.4642	9.03701	3.02347	0.0553741	chr4	78738684	78738990	307	1226	CNOT6L	ENSG00000138767	51.1745	27.3863	-23.7882	-24.1371	-3.08286	0.0573244
chr9	125169493	125170066	574	-20564	AL162424.1	ENSG00000269738	26.4632	47.1096	20.6464	18.0505	3.82127	0.0576869	chr4	79698615	79698920	306	1082	BMP2K	ENSG00000138756	78.1343	55.2153	-22.919	-23.3965	-3.45706	0.057044
chr9	126107398	126108198	801	-10250	CRB2	ENSG00000148204	42.8523	66.8408	23.9885	87.6898	3.77075	0.0544962	chr4	81107011	81107187	177	586	PRDM8	ENSG00000152784	37.0459	13.803	-23.2429	-51.482	-3.00055	0.0680378
chr9	126137621	126137654	34	6452	CRB2	ENSG00000148204	50.2696	68.0347	17.7651	9.05703	3.0227	0.0554202	chr4	83482061	83482155	95	952	TMEM150C	ENSG00000249242	66.4688	45.9475	-20.5213	-16.4602	-3.06969	0.0600721
chr9	126235243	126235908	666	104074	CRB2	ENSG00000148204	59.0533	82.4254	23.3721	56.2399	4.07271	0.059216	chr4	83706611	83707439	829	12469	SCD5	ENSG00000145284	59.8138	36.5146	-23.2993	-32.2584	-3.32967	0.0584385
chr9	127109967	127110163	197	47702	NEK6	ENSG00000119408	70.8548	85.7101	14.8553	28.1901	3.20137	0.0536673	chr4	83851790	83852502	713	-29470	SEC31A	ENSG00000138674	80.9231	57.6624	-23.2607	-24.4533	-3.15202	0.0602002
chr9	127562451	127563314	864	0	OLFML2A	ENSG00000185585	41.0525	68.36	27.3075	67.5477	4.55386	0.0591949	chr4	83955224	83955236	13	-363	COPS4	ENSG00000138663	78.1654	59.0517	-19.1138	-10.3011	-3.31406	0.0576555
chr9	127670115	127670657	543	32720	GOLGA1	ENSG00000136935	63.0767	81.1857	18.109	9.88767	3.4791	0.0538702	chr4	85047423	85047552	130	370550	NKX6-1	ENSG00000163623	46.7034	27.2584	-19.445	-9.99868	-3.28798	0.0627724
chr9	128303418	128305025	1608	-56637	MAPKAP1	ENSG00000119487	56.2497	77.0638	20.8141	83.9943	3.93468	0.0550011	chr4	85047872	85048380	509	369722	NKX6-1	ENSG00000163623	52.0779	32.5038	-19.5742	-91.8649	-3.16596	0.0627724
chr9	128340682	128340940	259	71755	MAPKAP1	ENSG00000119487	59.97	82.1177	22.1478	11.806	4.13249	0.0555266	chr4	86758549	86759208	660	9502	ARHGAP24	ENSG00000138639	60.3425	36.5842	-23.7583	-52.238	-3.26082	0.0592711
chr9	128694469	128694619	151	66918	PBX3	ENSG00000167081	53.7568	71.5381	17.7813	15.3359	3.0851	0.056705	chr4	87817305	87817506	202	-3735	C4orf36	ENSG00000163633	43.7119	26.3354	-17.3765	-12.5162	-3.03956	0.0589973
chr9	128761224	128761451	228	133673	PBX3	ENSG00000167081	49.7224	68.8191	19.0967	27.6824	3.11723	0.0604099	chr4	87857747	87858051	305	184	AFF1	ENSG00000172493	65.6242	41.8798	-23.7445	-14.639	-3.19616	0.0614142
chr9	128779745	128780021	277	152194	PBX3	ENSG00000167081	60.0634	76.5449	16.4815	19.2574	3.25453	0.0556022	chr4	87994829	87995612	784	24024	AFF1	ENSG00000172493	51.6752	30.0365	-21.6387	-31.5183	-3.03394	0.0580249
chr9	128821111	128821304	194	193560	PBX3	ENSG00000167081	36.3434	63.3848	27.0414	41.5917	3.60956	0.0822454	chr4	88637629	88637753	125	66169	DMP1	ENSG00000152592	59.0864	38.039	-21.0473	-12.456	-3.03448	0.0658609
chr9	129089972	129090337	366	843	MVB12B	ENSG00000196814	22.052	45.8943	23.8423	26.2917	4.75729	0.056567	chr4	89080382	89080517	136	0	ABCG2	ENSG00000118777	55.3833	32.2657	-23.1177	-39.9431	-3.01775	0.0598028
chr9	129104377	129105031	655	6850	MVB12B	ENSG00000196814	55.8417	78.3876	22.546	44.0367	3.54632	0.0621779	chr4	99915630	99915938	309	-832	METAP1	ENSG00000164024	73.9307	49.3972	-24.5335	-36.9034	-3.41868	0.0610854
chr9	129199373	129200089	717	60650	MVB12B	ENSG00000196814	58.33	78.4275	20.0975	49.2065	3.714	0.0557947	chr4	100011088	100011782	695	-1185	ADH5	ENSG00000197894	62.1503	37.6732	-24.4771	-21.3005	-3.11432	0.0590288
chr9	130225831	130226252	422	11296	LRSAM1	ENSG00000148356	53.8798	72.6179	18.7381	19.4582	3.40618	0.0552101	chr4	100012339	100012675	337	-2436	ADH5	ENSG00000197894	82.21	63.4941	-18.7159	-10.0507	-3.06688	0.0590288
chr9	130430192	130430646	455	-38624	C9orf117	ENSG00000160401	49.9731	72.7574	22.7843	68.8659	3.54385	0.0556224	chr4	100872659	100872895	237	-1113	H2AFZ	ENSG00000164032	75.5239	56.5964	-18.9275	-25.5084	-3.00253	0.0583074
chr9	130668167	130668938	772	-557	ST6GALNAC6	ENSG00000160408	55.3367	71.3235	15.9868	64.0862	3.58942	0.053832	chr4	103267071	103267093	23	-439	SLC39A8	ENSG00000138821	30.4274	9.65505	-20.7723	-10.3711	-3.30996	0.0601703
chr9	132170642	132170871	230	-200291	NTMT1	ENSG00000148335	52.6137	73.7481	21.1343	12.7458	3.23844	0.0626947	chr4	108747152	108747678	527	787	SGMS2	ENSG00000164023	59.9706	29.0442	-30.9264	-33.2757	-3.69016	0.0592667
chr9	132500596	132500737	142	14588	PTGES	ENSG00000148344	17.0315	39.3277	22.2962	13.2748	3.41565	0.0588052	chr4	108853633	108853806	174	880	CYP2U1	ENSG00000155016	73.7193	54.9506	-18.7688	-12.5995	-3.01147	0.057044
chr9	132517870	132518743	874	-2543	PTGES	ENSG00000148344	60.4868	81.2378	20.751	71.5122	4.32929	0.0536673	chr4	110222611	110222852	242	670	COL25A1	ENSG00000188517	73.9405	57.4394	-16.501	-30.7384	-3.13691	0.0609737
chr9	133729462	133730023	562	19008	ABL1	ENSG00000097007	56.5124	72.0682	15.5557	34.0646	3.54602	0.057354	chr4	110480453	110480758	306	-602	CCDC109B	ENSG00000005059	38.5806	16.3903	-22.1903	-17.359	-3.00609	0.0596533
chr9	133806889	133807061	173	-1522	FIBCD1	ENSG00000130720	65.687	83.4791	17.7921	35.6726	3.28707	0.0560893	chr4	111532882	111533346	465	10860	PITX2	ENSG00000164093	15.2642	4.45387	-10.8104	90.9057	3.58699	0.0687731
chr9	133973216	133973328	113	-207	AIF1L	ENSG00000126878	60.5934	78.1705	17.5772	9.35104	3.33446	0.0561299	chr4	111539931	111540457	527	3749	PITX2	ENSG00000164093	82.9367	18.9639	-63.9728	-83.0188	-3.00349	0.0623803
chr9	134377850	134377896	47	-392	POMT1	ENSG00000130714	40.9833	53.0459	12.0626	12.1727	3.07286	0.0556598	chr4	111554122	111554831	710	3344	PITX2	ENSG00000164093	75.7691	14.1013	-61.6678	-124.117	-3.05916	0.0575089
chr9	134609200	134609804	605	3120	RAPGEF1	ENSG00000107263	26.0729	43.9327	17.8598	24.6174	3.75604	0.0551126	chr4	111559219	111560202	984	-710	PITX2	ENSG00000164093	67.3469	6.15494	-61.192	-86.1057	-3.12846	0.0670062
chr9	135724537	135725093	557	-28320	C9orf9	ENSG00000165698	40.9318	62.5588	21.627	49.8589	3.77606	0.0549026	chr4	114223576	114224165	590	9437	ANK2	ENSG00000145362	72.8237	47.3559	-25.4678	-27.0027	-3.11514	0.0638672
chr9	136437491	136438009	519	7358	FAM163B	ENSG00000196990	32.0837	53.9595	21.8758	69.2034	4.12989	0.0557782	chr4	114238156	114238406	251	-1334	ANK2	ENSG00000145362	68.9209	48.0987	-20.8221	-12.3899	-3.08865	0.057472
chr9	136448685	136449527	843	1791	FAM163B	ENSG00000196990	28.5421	78.0742	49.532	200.144	6.75643	0.0777959	chr4	114277273	114277305	33	-1439	ANK2	ENSG00000145362	70.0037	51.8521	-18.1516	-12.075	-3.01574	0.06274
chr9	136676653	136676839	187	-71575	SARDH	ENSG00000123453	68.557	85.9065	17.3495	27.8528	3.14638	0.0594627	chr4	120551256	120551440	185	-1109	PDE5A	ENSG00000138735	71.7257	40.3723	-31.3534	-10.5429	-3.36031	0.0656158
chr9	136734624	136735539	916	121863	VAV2	ENSG00000160293	44.0509	72.3402	28.2893	140.597	7.27468	0.0539768	chr4	124307567	124308382	816	-9567	SPRY1	ENSG00000164056	61.2501	37.4216	-23.8284	-51.4048	-3.02144	0.0658844
chr9	137097787	137098106	320	92872	WDR5	ENSG00000196363	29.9848	53.2406	23.2558	42.0234	3.63917	0.0667355	chr4	124321504	124322593	1090	380	SPRY1	ENSG00000164056	59.8149	20.8012	-39.0137	-38.1345	-3.2621	0.07032
chr9	137249054	137249155	102	30627	RXRA	ENSG00000186350	61.7411	82.4276	20.6865	18.2364	3.07589	0.0639944	chr4	128704859	128705101	243	154	HSPA4L	ENSG00000164070	72.7157	51.4576	-21.2581	-18.3233	-3.50246	0.0584406
chr9	137527218	137527309	92	-6310	COL5A1	ENSG00000130635	63.7624	82.4457	18.6834	9.02841	3.01235	0.0576524	chr4	129019372	129019681	310	20375	LARP1B	ENSG00000138709	88.6925	67.0437	-21.6488	-13.6944	-3.37826	0.0579245
chr9	137552987	137553047	61	19366	COL5A1	ENSG00000130635	39.6977	64.6805	24.9827	9.24833	3.08808	0.0830343	chr4	129708838	129709519	682	-21259	JADE1	ENSG00000077684	78.6587	59.1652	-19.4935	-73.9439	-3.05528	0.057044
chr9	137617701	137617994	294	84080	COL5A1	ENSG00000130635	55.8592	73.7285	17.8692	12.2462	3.09055	0.0636589	chr4	140093503	140093599	97	4772	ELF2	ENSG00000109381	68.0297	48.7314	-19.2983	-9.29646	-3.04537	0.057044
chr9	137673482	137673584	103	-42905	COL5A1	ENSG00000130635	61.6918	77.6047	15.9129	18.5493	3.10598	0.0551446	chr4	140221729	140221875	147	482	NDUFC1	ENSG00000109390	38.1217	14.1571	-23.9647	-19.2496	-3.34501	0.0585978
chr9	138559122	138559566	445	3953	LCN9	ENSG00000148386	24.8261	48.1319	23.3058	54.1027	3.56699	0.0578087	chr4	140408784	140408795	12	33822	RAB33B	ENSG00000172007	77.4424	58.6701	-18.7723	-9.09062	-3.02632	0.057044
chr9	138923803	138924224	422	18201	NACC2	ENSG00000148411	45.1285	71.3525	26.2241	34.7404	4.42544	0.0631069	chr4	142141663	142141730	68	-310	ZNF330	ENSG00000109445	78.3276	58.3755	-19.9521	-11.5243	-3.57277	0.0581669
chr9	138996916	138997049	134	-9784	NACC2	ENSG00000148411	42.9494	61.8911	18.9417	16.021	3.27965	0.0624394	chr4	144436841	144437016	176	2224	SMARCA5	ENSG00000153147	39.9631	18.938	-21.0251	-18.2158	-3.35351	0.0571931
chr9	139002607	139002705	99	7414	C9orf69	ENSG00000238227	33.4893	49.8797	16.3904	15.867	3.22594	0.0536673	chr4	145905629	145906024	396	112509	ANAPC10	ENSG00000164162	81.6477	62.8473	-18.8004	-23.8288	-3.24547	0.057044
chr9	139220122	139220271	150	-481	DKFZP434A062	ENSG00000267845	61.8167	81.33	19.5133	13.4239	3.69478	0.0560357	chr4	146099119	146099555	437	0	OTUD4	ENSG00000164164	48.3938	28.9163	-19.4775	-21.3533	-3.03145	0.0598584
chr9	139223843	139224100	258	1910	GPSM1	ENSG00000160360	24.4324	48.3334	23.901	40.7911	3.55813	0.0624455	chr4	147441183	147441808	626	1060	SLC10A7	ENSG00000120519	58.5024	31.2038	-27.2986	-27.8305	-3.01463	0.0586028
chr9	139255423	139256043	621	2127	DNLZ	ENSG00000213221	31.2509	54.2366	22.9857	161.672	4.82774	0.0551136	chr4	148606024	148606173	150	-642	PRMT10	ENSG00000164169	73.5125	53.2544	-20.2581	-14.7392	-3.07517	0.0591226
chr9	139479952	139480026	75	-39637	NOTCH1	ENSG00000148400	51.1111	68.695	17.5839	9.18857	3.08567	0.0550017	chr4	148655163	148656090	928	1948	ARHGAP10	ENSG00000071205	54.8165	25.7391	-29.0774	-42.4979	-3.06111	0.0665489
chr9	139683138	139683388	251	-2418	TMEM141	ENSG00000244187	43.8772	65.134	21.2568	44.63	3.27191	0.0676048	chr4	148886019	148886298	280	83000	ARHGAP10	ENSG00000071205	67.9367	42.928	-25.0087	-15.1587	-3.00873	0.0596149
chr9	139889630	139890134	505	1120	CLIC3	ENSG00000169583	28.0569	47.6999	19.643	143.592	3.68316	0.0546586	chr4	148944420	148945371	952	141401	ARHGAP10	ENSG00000071205	84.7029	49.6088	-35.0941	-73.631	-3.01534	0.073303
chr9	140010631	140010955	325	-1001	DPP7	ENSG00000176978	41.3953	64.97	23.5747	9.93189	3.50615	0.0668963	chr4	149362259	149362435	177	940	NR3C2	ENSG00000151623	70.3894	44.6068	-25.7826	-12.823	-3.15879	0.0634274
chr9	140011535	140011640	106	-1905	DPP7	ENSG00000176978	39.8162	60.088	20.2718	18.7528	3.22195	0.0608168	chr4	152546666	152546729	64	92501	FAM160A1	ENSG00000164142	66.7462	49.8512	-16.895	-9.16324	-3.04714	0.0609083
chr9	140145067	140145201	135	-511	C9orf173	ENSG00000197768	32.841	48.7018	15.8608	9.1513	3.07432	0.0554846	chr4	154389325	154389708	384	1823	KIAA0922	ENSG00000121210	73.5761	53.7847	-19.7915	-23.0094	-3.19135	0.0570772
chr9	140382953	140383012	60	26948	PNPLA7	ENSG00000130653	21.1013	40.0529	18.9516	12.1107	3.0348	0.0578708	chr4	156679488	156680120	633	-23	GUCY1B3	ENSG00000061918	48.2202	31.1366	-17.0836	-71.4521	-3.14922	0.0662834
chr9	140592271	140592405	135	78816	EHMT1	ENSG00000181090	49.0504	70.6691	21.6187	15.4282	3.18717	0.0655555	chr4	156681360	156681694	335	748	GUCY1B3	ENSG00000061918	25.9127	12.6157	-13.297	-49.9213	-3.08496	0.0649912
chr10	498644	499405	762	-64894	DIP2C	ENSG00000151240	54.2422	77.806	23.5638	59.7628	3.82805	0.0624929	chr4	160026608	160026814	207	1277	RAPGEF2	ENSG00000109756	60.9229	42.2713	-18.6516	-9.31171	-3.01111	0.0623618
chr10	588453	588536	84	41363	DIP2C	ENSG00000151240	38.3429	59.2136	20.8707	9.1446	3.0837	0.0592243	chr4	166034752	166034834	83	-680	TMEM192	ENSG00000170088	71.1159	51.3279	-19.788	-19.8563	-3.17515	0.0627918
chr10	650831	651579	749	-20930	DIP2C	ENSG00000151240	56.2303	79.7655	23.5352	82.4993	4.5651	0.0552746	chr4	166176863	166177679	817	15362	KLHL2	ENSG00000109466	68.7145	47.2795	-21.435	-27.9478	-3.01645	0.057044
chr10	1053412	1055791	2380	16007	IDI2	ENSG00000148377	64.1113	88.2536	24.1423	177.557	4.64668	0.0590791	chr4	173300953	173301430	478	327356	GALNTL6	ENSG00000174473	39.2053	17.1372	-22.0681	-27.5988	-3.27209	0.0608121
chr10	2932886	2933283	398	-175241	PFKP	ENSG00000067057	34.1386	54.0157	19.8771	32.9545	3.43915	0.0622414	chr4	182200329	182200809	481	-865033	TENM3	ENSG00000218336	37.1253	22.3254	-14.7999	-12.5035	-3.075	0.0600177
chr10	3280941	3281238	298	-65937	PITRM1	ENSG00000107959	30.7342	52.0314	21.2971	56.0981	4.27111	0.056619	chr4	184021705	184022395	691	1059	WWC2	ENSG00000151718	54.4695	29.7127	-24.7568	-37.1431	-3.0284	0.0619943
chr10	3852435	3852604	170	-24961	KLF6	ENSG00000067082	35.7995	54.7061	18.9066	15.7072	3.16459	0.0631368	chr4	184332213	184333089	877	-32654	CDKN2AIP	ENSG00000168564	76.2943	50.3435	-25.9508	-81.0785	-3.10593	0.060742
chr10	4358488	4358974	487	-469846	AKR1E2	ENSG00000165568	33.2237	55.2282	22.0046	42.6048	3.58201	0.0552254	chr4	185511743	185512140	398	57605	CASP3	ENSG00000164305	43.1002	19.977	-23.1232	-42.972	-3.0181	0.0745364
chr10	4359389	4359814	426	-469006	AKR1E2	ENSG00000165568	51.498	74.4803	22.9823	10.3421	3.68371	0.0552254	chr4	185734308	185735006	699	0	RP11-701P16.2	ENSG00000251139	68.6028	40.8877	-27.7151	-45.8608	-3.07621	0.0680952
chr10	5552215	5552387	173	-10681	CALML5	ENSG00000178372	30.3418	52.4406	22.0988	14.3528	3.87063	0.0555765	chr4	185745874	185746009	136	1178	ACSL1	ENSG00000151726	59.1818	32.7316	-26.4501	-10.8697	-3.47677	0.0655321
chr10	5555622	5555707	86	-11216	CALML3	ENSG00000178363	21.373	41.4218	20.0488	9.50285	3.21174	0.0558306	chr4	186065230	186065358	129	834	SLC25A4	ENSG00000151729	48.6673	25.6382	-23.0291	-11.5683	-3.12421	0.0640531
chr10	5610245	5610481	237	43320	CALML3	ENSG00000178363	61.9549	80.7609	18.806	13.4977	3.43712	0.0554809	chr4	186265247	186265758	512	34242	LRP2BP	ENSG00000109771	82.0688	57.3692	-24.6996	-33.0861	-3.04296	0.0664629
chr10	5792963	5793776	814	20337	FAM208B	ENSG00000108021	42.5067	70.3245	27.8178	39.3091	5.00492	0.0588898	chr4	186714027	186714523	497	-16960	SORBS2	ENSG00000154556	72.8601	60.7559	-12.1042	-19.1481	-3.12343	0.0610605
chr10	11911816	11912535	720	172	PROSER2	ENSG00000148426	9.68751	51.4709	41.7834	359.435	6.41847	0.0809243	chr4	186731805	186733060	1256	0	SORBS2	ENSG00000154556	47.9236	37.0205	-10.9031	-113.05	-3.34758	0.0646561
chr10	13381775	13382406	632	383	SEPHS1	ENSG00000086475	33.3367	57.0777	23.741	48.628	4.28325	0.0597136	chr4	186961145	186961708	564	-28597	TLR3	ENSG00000164342	49.423	32.8949	-16.5281	-41.7571	-3.00786	0.067493
chr10	13544329	13544863	535	81	BEND7	ENSG00000165626	49.4094	70.6655	21.256	42.562	3.70348	0.0552254	chr4	187071027	187071290	264	699	FAM149A	ENSG00000109794	82.2992	64.1772	-18.1221	-37.9434	-3.0752	0.069098
chr10	13759382	13759416	35	107334	RP11-295P9.3	ENSG00000239665	29.3663	45.0858	15.7195	9.10124	3.05488	0.0632252	chr4	187643746	187643877	132	1131	FAT1	ENSG00000083857	25.9495	14.5639	-11.3855	-9.77902	-3.07663	0.0604307
chr10	14046992	14047178	187	3353	FRMD4A	ENSG00000151474	60.9816	74.4868	13.5052	15.5134	3.19485	0.0616864	chr4	187760194	187762116	1923	-112317	FAT1	ENSG00000083857	57.185	45.2601	-11.925	-138.43	-3.10438	0.0745103
chr10	14056720	14056793	74	-6187	FRMD4A	ENSG00000151474	69.2751	84.0747	14.7996	9.08423	3.05175	0.0590156	chr4	188533704	188533918	215	-383006	ZFP42	ENSG00000179059	68.9831	57.795	-11.1881	-16.8702	-3.22073	0.0573718
chr10	15253798	15253957	160	-43105	NMT2	ENSG00000152465	24.6777	44.6849	20.0072	17.8544	4.09902	0.0612838	chr4	188963373	188963624	252	46447	ZFP42	ENSG00000179059	67.846	54.8889	-12.9571	-48.2355	-3.07236	0.0596548
chr10	18914779	18915289	511	25261	NSUN6	ENSG00000241058	67.6061	89.571	21.9649	36.461	3.92066	0.059356	chr4	189259581	189259907	327	199007	TRIML1	ENSG00000184108	48.242	31.4379	-16.8041	-20.6144	-3.17128	0.0665554
chr10	20002709	20004070	1362	-15432	MALRD1	ENSG00000204740	32.2122	59.1689	26.9567	140.335	5.45163	0.0567648	chr4	189972041	189972185	145	-889757	FRG1	ENSG00000109536	17.2601	4.38881	-12.8713	-18.984	-3.01408	0.066987
chr10	20161789	20162332	544	56620	PLXDC2	ENSG00000120594	38.9927	57.0531	18.0604	30.5825	3.52761	0.0589206	chr4	190067986	190069237	1252	-792705	FRG1	ENSG00000109536	37.4824	27.2736	-10.2088	-109.32	-3.01718	0.0585625
chr10	21658375	21658929	555	127261	CASC10	ENSG00000204682	52.2318	74.4153	22.1835	20.912	4.67172	0.0552254	chr4	190766726	190767045	320	-94897	FRG1	ENSG00000109536	56.3886	36.6019	-19.7867	-16.3204	-3.52227	0.0594082
chr10	22291143	22291206	64	1121	DNAJC1	ENSG00000136770	11.6875	31.627	19.9395	10.1033	3.69373	0.0585099	chr5	351610	351887	278	7966	AHRR	ENSG00000063438	77.8769	57.4143	-20.4625	-21.4043	-3.0107	0.063028
chr10	29530071	29530756	686	-47233	LYZL1	ENSG00000120563	43.6149	65.8306	22.2157	44.2804	3.21183	0.0691618	chr5	644361	644794	434	-22964	AC026740.1	ENSG00000268885	80.5664	53.8355	-26.7309	-43.3458	-3.01817	0.0774395
chr10	29543503	29544402	900	-33587	LYZL1	ENSG00000120563	30.178	59.2266	29.0487	66.2648	5.93172	0.0619038	chr5	927383	927437	55	33625	TRIP13	ENSG00000071539	63.6657	47.8288	-15.8368	-15.5047	-3.03898	0.0559792
chr10	29544883	29545670	788	-32319	LYZL1	ENSG00000120563	27.8574	59.2357	31.3783	59.1755	5.96304	0.0589228	chr5	1133969	1134072	104	-21818	SLC12A7	ENSG00000113504	56.5206	28.6831	-27.8375	-9.45892	-3.13877	0.076505
chr10	29828294	29828967	674	-16837	SVIL	ENSG00000197321	62.6255	85.6217	22.9963	42.5956	3.86333	0.0556321	chr5	1190555	1190909	355	-10800	SLC6A19	ENSG00000174358	43.6863	20.7629	-22.9234	-34.498	-3.03546	0.0620823
chr10	30282277	30282588	312	65864	KIAA1462	ENSG00000165757	45.2627	66.2054	20.9427	49.3118	3.10265	0.0584843	chr5	1488995	1489693	699	34398	LPCAT1	ENSG00000153395	79.7121	54.3112	-25.4009	-56.5902	-3.31473	0.0569602
chr10	30932743	30933736	994	-14051	LYZL2	ENSG00000151033	35.2646	60.2557	24.9912	72.522	4.55898	0.0606271	chr5	1632984	1633082	99	-108891	LPCAT1	ENSG00000153395	53.6802	37.1481	-16.5321	-15.4968	-3.01899	0.0559792
chr10	31036307	31037805	1499	108809	ZNF438	ENSG00000183621	40.3344	72.023	31.6886	100.251	5.28351	0.070914	chr5	1855818	1855866	49	26991	IRX4	ENSG00000113430	53.6293	34.7845	-18.8449	-12.0401	-3.00068	0.0592926
chr10	31423854	31423993	140	-102987	ZNF438	ENSG00000183621	15.0021	30.1497	15.1476	13.3736	3.40382	0.0578874	chr5	1949277	1949722	446	-61926	IRX4	ENSG00000113430	48.5578	17.3789	-31.1789	-83.0763	-3.13894	0.0717033
chr10	32587186	32587557	372	48555	EPC1	ENSG00000120616	41.8596	60.5162	18.6566	16.6821	3.46417	0.0584033	chr5	1966734	1967990	1257	-79383	IRX4	ENSG00000113430	37.0398	16.6132	-20.4266	-73.3841	-3.00306	0.0562519
chr10	33411015	33412284	1270	62298	NRP1	ENSG00000099250	43.2544	66.3743	23.1199	58.5049	3.89	0.0571504	chr5	3327977	3328183	207	-267984	IRX1	ENSG00000170549	77.4929	53.0541	-24.4388	-18.5129	-3.02842	0.0723807
chr10	34741555	34741866	312	-25895	PARD3	ENSG00000148498	67.6467	88.321	20.6743	21.6878	3.24158	0.0575396	chr5	6602773	6603863	1091	29291	NSUN2	ENSG00000037474	80.8467	49.647	-31.1997	-105.528	-3.26308	0.0570269
chr10	35260313	35260747	435	99519	CUL2	ENSG00000108094	49.5658	67.6966	18.1307	34.8175	3.24105	0.0561362	chr5	8844013	8845098	1086	420558	SEMA5A	ENSG00000112902	64.874	38.8955	-25.9785	-56.8803	-3.21136	0.0610466
chr10	35895595	35895944	350	1256	GJD4	ENSG00000177291	23.9324	55.2978	31.3654	28.3318	5.15714	0.0620783	chr5	10893642	10894892	1251	-132257	DAP	ENSG00000112977	71.0083	46.5766	-24.4317	-68.917	-3.01151	0.0608455
chr10	43476865	43477278	414	-95196	RET	ENSG00000165731	47.0343	68.174	21.1397	71.6385	3.82452	0.0596561	chr5	14146816	14147007	192	2986	TRIO	ENSG00000038382	64.3532	40.3736	-23.9796	-13.2346	-3.03099	0.0614814
chr10	43845823	43846147	325	-20942	FXYD4	ENSG00000150201	29.0719	51.3422	22.2703	25.3749	3.37433	0.0672449	chr5	14147421	14147723	303	3591	TRIO	ENSG00000038382	75.8203	51.6368	-24.1835	-30.2049	-3.07086	0.0614814
chr10	44700753	44702029	1277	-171657	AL137026.1	ENSG00000269515	38.2757	74.9055	36.6298	92.2331	4.93755	0.0659658	chr5	14293096	14293630	535	2009	TRIO	ENSG00000038382	79.7874	59.6654	-20.122	-31.7481	-3.05706	0.0567875
chr10	44803846	44804044	199	-69642	AL137026.1	ENSG00000269515	36.14	65.111	28.971	13.6166	3.50084	0.061028	chr5	14417136	14417325	190	-71231	TRIO	ENSG00000038382	70.6992	48.2018	-22.4974	-15.5324	-3.0881	0.0604398
chr10	49732476	49732637	162	-194	ARHGAP22	ENSG00000128805	20.2821	38.9938	18.7116	55.2696	3.71557	0.0603843	chr5	14505920	14506616	697	17362	TRIO	ENSG00000038382	63.9814	37.6473	-26.3341	-86.3469	-3.03654	0.0609955
chr10	50325344	50325906	563	-1789	VSTM4	ENSG00000165633	51.5474	75.0795	23.5321	15.3657	3.1223	0.0686677	chr5	14580983	14581363	381	-520	FAM105A	ENSG00000145569	57.0436	26.3982	-30.6453	-26.8652	-3.65356	0.0712666
chr10	54075230	54075615	386	1173	DKK1	ENSG00000107984	17.8081	42.9054	25.0974	24.0528	5.9776	0.0604208	chr5	15521668	15522169	502	20120	FBXL7	ENSG00000183580	69.2628	41.7899	-27.473	-36.1487	-4.20944	0.0598488
chr10	58107510	58108828	1319	10690	ZWINT	ENSG00000122952	47.3514	74.2336	26.8822	55.5451	4.55988	0.061011	chr5	16508529	16509144	616	0	FAM134B	ENSG00000154153	54.0093	29.2111	-24.7981	-36.6073	-3.09258	0.0643886
chr10	61802440	61803466	1027	12329	ANK3	ENSG00000151150	50.5172	71.3949	20.8777	38.6935	3.37506	0.0634818	chr5	16809827	16810367	541	-67489	MYO10	ENSG00000145555	82.1158	57.3583	-24.7575	-42.1503	-3.11859	0.0572594
chr10	61803842	61803884	43	11911	ANK3	ENSG00000151150	55.3245	75.1852	19.8607	9.08868	3.05493	0.0649591	chr5	16855699	16856312	614	60323	MYO10	ENSG00000145555	68.1969	44.0398	-24.157	-45.4366	-3.00333	0.0576417
chr10	61828425	61828601	177	-4378	ANK3	ENSG00000151150	61.5474	81.2146	19.6671	33.9212	3.69527	0.0598209	chr5	16983255	16983521	267	-46882	MYO10	ENSG00000145555	68.6492	47.1414	-21.5078	-30.317	-3.25328	0.0602427
chr10	61829322	61829960	639	-5275	ANK3	ENSG00000151150	59.2315	83.7974	24.5658	50.3401	5.18839	0.0600082	chr5	17143218	17144570	1353	-73098	BASP1	ENSG00000176788	85.9273	64.0839	-21.8434	-78.5165	-3.10564	0.0579094
chr10	62493680	62494027	348	-431	ANK3	ENSG00000151150	46.2706	66.5231	20.2525	46.3762	4.26648	0.0589825	chr5	17316805	17317899	1095	99135	BASP1	ENSG00000176788	57.1637	35.524	-21.6397	-58.2792	-3.0641	0.0581154
chr10	65387223	65387380	158	106099	REEP3	ENSG00000165476	54.6498	75.5246	20.8747	18.4029	3.97145	0.0580347	chr5	31193046	31193432	387	-424	CDH6	ENSG00000113361	56.8433	40.33	-16.5133	-36.5371	-3.02601	0.0747242
chr10	69610569	69611080	512	-12646	DNAJC12	ENSG00000108176	40.9122	72.4786	31.5664	55.0617	5.97323	0.0621527	chr5	31398263	31398752	490	127680	DROSHA	ENSG00000113360	74.1104	55.3427	-18.7677	-50.4285	-3.04302	0.0559792
chr10	69611449	69611755	307	-13526	DNAJC12	ENSG00000108176	33.0038	64.9105	31.9067	20.3394	5.42461	0.0621527	chr5	31638273	31638596	324	-920	PDZD2	ENSG00000133401	37.8761	22.539	-15.3371	-16.2381	-3.05189	0.0587038
chr10	70090753	70090787	35	-1044	HNRNPH3	ENSG00000096746	20.7056	39.4026	18.6971	13.405	3.3939	0.0598022	chr5	31770333	31770816	484	-28214	PDZD2	ENSG00000133401	41.7304	22.159	-19.5714	-24.0092	-3.29991	0.0656819
chr10	70302502	70302549	48	-15270	SLC25A16	ENSG00000122912	18.3168	38.08	19.7632	9.02637	3.01214	0.0654258	chr5	31855684	31856039	356	56652	PDZD2	ENSG00000133401	34.0562	10.6496	-23.4065	-31.8714	-3.05503	0.0590584
chr10	71489173	71489644	472	44517	RP11-242G20.1	ENSG00000235645	36.2198	54.3596	18.1398	37.6917	3.21531	0.0552254	chr5	32029896	32030461	566	143994	GOLPH3	ENSG00000113384	75.592	51.9399	-23.6521	-19.1811	-3.02554	0.0638282
chr10	72254711	72255289	579	16133	PALD1	ENSG00000107719	49.99	69.4988	19.5088	61.311	3.51753	0.0552857	chr5	32190123	32190762	640	-15666	GOLPH3	ENSG00000113384	70.1754	49.0611	-21.1143	-44.5188	-3.01289	0.0635629
chr10	72433104	72433272	169	544	ADAMTS14	ENSG00000138316	7.43839	27.959	20.5206	20.0856	3.41333	0.0585029	chr5	32274537	32275776	1240	37267	MTMR12	ENSG00000150712	70.4347	45.4087	-25.026	-59.538	-3.16482	0.0559792
chr10	72576844	72577505	662	1117	SGPL1	ENSG00000166224	59.9071	79.3475	19.4404	55.9618	3.51016	0.0586866	chr5	32443052	32443324	273	1542	ZFR	ENSG00000056097	39.4665	19.7963	-19.6702	-27.5043	-3.18281	0.0605294
chr10	72618535	72618900	366	4071	SGPL1	ENSG00000166224	56.4587	76.351	19.8923	15.7205	3.272	0.0552254	chr5	32533703	32534384	682	1778	SUB1	ENSG00000113387	63.7428	43.6351	-20.1077	-40.1796	-3.00769	0.0590197
chr10	73019668	73021280	1613	46983	UNC5B	ENSG00000107731	26.2245	63.3237	37.0992	145.55	5.4533	0.0625399	chr5	34497122	34497525	404	-158816	RAI14	ENSG00000039560	46.33	23.7947	-22.5353	-21.6947	-3.01936	0.0645934
chr10	73158381	73158622	242	1686	CDH23	ENSG00000107736	36.6422	60.6863	24.0441	19.9346	3.48103	0.0612759	chr5	36153453	36153568	116	1222	SKP2	ENSG00000145604	47.8892	29.4299	-18.4593	-9.53196	-3.11367	0.0569323
chr10	73663370	73663990	621	-52243	PSAP	ENSG00000197746	53.5144	77.2303	23.7159	53.3973	4.2049	0.0552254	chr5	37843724	37844690	967	-3935	GDNF	ENSG00000168621	65.1055	41.3851	-23.7204	-52.378	-3.0535	0.0678601
chr10	73998469	73998869	401	-21576	ASCC1	ENSG00000138303	62.3368	78.849	16.5122	21.9318	3.20782	0.0552254	chr5	38445914	38446821	908	215	EGFLAM	ENSG00000164318	60.7078	14.8747	-45.8331	-139.623	-3.02267	0.11123
chr10	74069159	74069880	722	34838	DNAJB12	ENSG00000148719	31.5395	56.4556	24.9162	62.5202	3.42475	0.0721504	chr5	38810644	38810905	262	-35054	OSMR	ENSG00000145623	70.9625	40.3053	-30.6572	-56.002	-3.11742	0.0828474
chr10	74559851	74560829	979	87788	MCU	ENSG00000156026	59.6651	77.5636	17.8984	33.1532	3.53615	0.0559952	chr5	38844854	38845145	292	-814	OSMR	ENSG00000145623	64.3808	37.6963	-26.6845	-37.2598	-3.40896	0.0590813
chr10	76574155	76574285	131	-11054	KAT6B	ENSG00000156650	59.7671	84.7046	24.9375	15.0774	4.13163	0.0614	chr5	39331765	39332018	254	32643	C9	ENSG00000113600	55.3468	38.0921	-17.2548	-20.009	-3.11831	0.0741092
chr10	76797978	76798651	674	19620	DUPD1	ENSG00000188716	41.4765	68.7829	27.3064	62.9832	5.09629	0.0577245	chr5	43039809	43040117	309	3154	ANXA2R	ENSG00000177721	53.1872	28.1887	-24.9984	-37.3406	-3.00788	0.0699541
chr10	77155990	77156551	562	5038	ZNF503	ENSG00000165655	25.8502	68.9268	43.0766	192.007	3.88377	0.105707	chr5	43557866	43558023	158	-5	PAIP1	ENSG00000172239	65.0119	43.4245	-21.5874	-24.0687	-3.09763	0.0592497
chr10	77157345	77157840	496	3749	ZNF503	ENSG00000165655	9.43399	44.7184	35.2845	68.5194	4.18766	0.0820511	chr5	50261283	50261484	202	297891	PARP8	ENSG00000151883	26.067	12.36	-13.707	-25.4338	-3.01026	0.0565341
chr10	78850438	78851054	617	-11129	KCNMA1	ENSG00000156113	65.3872	82.8498	17.4626	31.7882	3.24016	0.055232	chr5	50686365	50687233	869	6858	ISL1	ENSG00000016082	67.1888	33.8643	-33.3245	-40.8979	-3.24585	0.0590655
chr10	80019925	80021185	1261	226283	RPS24	ENSG00000138326	65.0338	85.7867	20.7529	61.0329	3.52668	0.05532	chr5	50690351	50691809	1459	10844	ISL1	ENSG00000016082	71.6384	36.9519	-34.6865	-64.0159	-3.01718	0.0644903
chr10	81744607	81745381	775	-2236	SFTPD	ENSG00000133661	30.1903	59.187	28.9967	41.7526	3.89255	0.0600436	chr5	50694681	50695125	445	15174	ISL1	ENSG00000016082	51.1926	2.63918	-48.5534	-103.86	-3.01427	0.0989421
chr10	82203408	82203868	461	-10053	TSPAN14	ENSG00000108219	38.259	55.1918	16.9328	18.7225	3.18842	0.055366	chr5	50695321	50695889	569	15814	ISL1	ENSG00000016082	59.3418	7.81405	-51.5277	-73.0619	-3.01348	0.101795
chr10	88842698	88842901	204	10925	GLUD1	ENSG00000148672	43.4222	66.1968	22.7746	18.8344	4.26271	0.0606437	chr5	53814511	53814690	180	917	SNX18	ENSG00000178996	69.3486	40.2641	-29.0845	-35.7456	-3.02234	0.0668453
chr10	95723024	95723714	691	-30031	PLCE1	ENSG00000138193	49.4868	77.0049	27.5181	37.4976	4.27231	0.0562416	chr5	53815461	53816094	634	1867	SNX18	ENSG00000178996	66.6808	30.7991	-35.8818	-55.832	-3.38801	0.0695207
chr10	98554194	98554404	211	-37612	LCOR	ENSG00000196233	50.5909	66.6925	16.1016	15.4606	3.18686	0.0552254	chr5	54196885	54198306	1422	55367	RP11-45H22.3	ENSG00000249016	42.7979	24.8498	-17.9481	-64.9304	-3.08538	0.0594649
chr10	98891610	98891821	212	53558	SLIT1	ENSG00000187122	39.5	56.9843	17.4843	18.5389	3.14417	0.055367	chr5	55481594	55482472	879	46280	ANKRD55	ENSG00000164512	85.9847	66.5026	-19.4821	-42.1065	-3.05599	0.0564584
chr10	101725347	101726745	1399	-34593	DNMBP	ENSG00000107554	39.2455	62.0109	22.7655	58.2655	4.56578	0.060593	chr5	56113196	56113788	593	1794	MAP3K1	ENSG00000095015	62.1646	35.81	-26.3546	-21.3837	-3.09656	0.0633026
chr10	104451125	104451847	723	22316	ARL3	ENSG00000138175	47.7389	76.9439	29.205	49.936	5.30684	0.0557671	chr5	56473067	56473137	71	1293	GPBP1	ENSG00000062194	61.6844	35.842	-25.8424	-14.7716	-3.61732	0.0582812
chr10	104472096	104472193	98	1970	ARL3	ENSG00000138175	40.0549	59.8738	19.8189	9.99279	3.57449	0.0561961	chr5	61822965	61823517	553	11679	IPO11	ENSG00000086200	86.8262	63.1135	-23.7128	-17.1438	-3.33563	0.0559792
chr10	104530046	104530147	102	-5858	WBP1L	ENSG00000166272	54.276	70.9138	16.6377	9.2976	3.14185	0.0636021	chr5	61933167	61933213	47	58464	LRRC70	ENSG00000186105	71.8988	52.7994	-19.0994	-9.46483	-3.13288	0.0559792
chr10	105341914	105342229	316	24071	NEURL1	ENSG00000107954	30.1071	70.9891	40.882	25.6268	6.60411	0.061186	chr5	64468007	64469412	1406	300105	ADAMTS6	ENSG00000049192	82.4553	48.7383	-33.717	-153.269	-3.30279	0.0578419
chr10	105342562	105343035	474	24719	NEURL1	ENSG00000107954	33.9069	74.183	40.2761	76.0476	6.87587	0.061186	chr5	65441873	65442492	620	1209	SREK1	ENSG00000153914	60.1498	37.0953	-23.0545	-27.4172	-3.04133	0.0678007
chr10	105536495	105537126	632	23928	SH3PXD2A	ENSG00000107957	54.108	77.1027	22.9947	27.3693	3.65422	0.0586391	chr5	66300900	66301480	581	416	MAST4	ENSG00000069020	60.7929	23.8551	-36.9378	-55.2377	-4.18519	0.0587175
chr10	105879708	105879933	226	-1882	SFR1	ENSG00000156384	12.2007	31.7795	19.5788	12.8782	3.35083	0.0574493	chr5	66458345	66458592	248	20082	MAST4	ENSG00000069020	91.4834	67.3308	-24.1526	-19.7827	-3.56715	0.0567849
chr10	110223801	110223849	49	-1299508	SORCS1	ENSG00000108018	29.6094	61.5478	31.9385	10.0124	3.42867	0.0597402	chr5	67367176	67367301	126	-118402	RP11-404L6.2	ENSG00000253787	59.6568	42.0721	-17.5847	-9.49894	-3.15985	0.0615233
chr10	111980031	111980758	728	-4992	MXI1	ENSG00000119950	43.323	71.2431	27.9201	24.1552	5.81527	0.0569826	chr5	67583486	67583759	274	-436	PIK3R1	ENSG00000145675	64.4541	39.3033	-25.1509	-33.4152	-3.16655	0.0592039
chr10	114235784	114235919	136	28767	VTI1A	ENSG00000151532	30.6396	51.0051	20.3655	9.08948	3.05758	0.0635299	chr5	68627787	68627856	70	686	CCDC125	ENSG00000183323	57.459	33.9275	-23.5315	-15.3244	-3.41202	0.0563001
chr10	115472380	115472788	409	3236	CASP7	ENSG00000165806	65.1435	81.9622	16.8187	31.2626	3.22454	0.0607921	chr5	68789955	68790107	153	1336	OCLN	ENSG00000197822	70.3985	45.7573	-24.6412	-14.5954	-3.13801	0.0569353
chr10	115786431	115786830	400	-16975	ADRB1	ENSG00000043591	41.7391	56.3108	14.5717	22.3298	3.24789	0.0561299	chr5	70882579	70882937	359	-186	MCCC2	ENSG00000131844	37.1802	16.8183	-20.3619	-28.0433	-3.00673	0.0582144
chr10	117893232	117893334	103	121972	GFRA1	ENSG00000151892	46.6856	66.5837	19.8982	15.0973	3.02522	0.0605019	chr5	72318378	72318404	27	66479	FCHO2	ENSG00000157107	85.4582	63.9965	-21.4617	-9.46097	-3.13671	0.0578913
chr10	118043350	118044150	801	-10370	GFRA1	ENSG00000151892	52.9872	72.5296	19.5424	29.512	3.4599	0.0568822	chr5	72677043	72677428	386	66923	FOXD1	ENSG00000251493	45.1449	25.917	-19.2279	-86.7351	-3.02392	0.0560891
chr10	119188363	119188611	249	-53384	PDZD8	ENSG00000165650	31.1258	53.5037	22.3779	9.1756	3.09137	0.0630784	chr5	76082686	76083096	411	-31661	F2RL1	ENSG00000164251	78.322	53.4444	-24.8776	-34.2522	-3.06442	0.0573186
chr10	119563672	119564454	783	241219	RAB11FIP2	ENSG00000107560	44.8151	67.0583	22.2432	69.9868	4.00899	0.0595391	chr5	76083404	76083543	140	-31214	F2RL1	ENSG00000164251	72.16	49.4839	-22.6761	-11.5439	-3.39853	0.0583322
chr10	120941232	120941419	188	-2886	PRDX3	ENSG00000165672	52.1343	73.8765	21.7422	13.1176	3.40982	0.0611702	chr5	76786614	76786949	336	160	WDR41	ENSG00000164253	56.1946	28.6009	-27.5937	-27.9254	-3.20095	0.0650813
chr10	121030164	121030806	643	63062	GRK5	ENSG00000198873	9.12594	32.2509	23.1249	78.9288	5.16502	0.0595663	chr5	77146796	77147023	228	17580	TBCA	ENSG00000171530	56.1343	34.9561	-21.1781	-36.2035	-3.03306	0.0574017
chr10	123370033	123370298	266	-12060	FGFR2	ENSG00000066468	55.9545	75.7834	19.829	15.6488	3.18531	0.0576425	chr5	77352273	77353006	734	-17298	AP3B1	ENSG00000132842	75.8454	54.66	-21.1854	-29.265	-3.18323	0.0568152
chr10	123496093	123496922	830	-138120	FGFR2	ENSG00000066468	43.3327	66.8704	23.5376	40.3234	3.89862	0.0604172	chr5	77830038	77830465	428	14508	LHFPL2	ENSG00000145685	76.3667	43.6003	-32.7664	-59.2217	-3.08494	0.0795518
chr10	123680736	123681438	703	5977	ATE1	ENSG00000107669	39.2815	61.2367	21.9551	45.9557	4.55174	0.0555549	chr5	78281663	78282241	579	0	ARSB	ENSG00000113273	49.4278	22.653	-26.7747	-63.5957	-3.27596	0.0610154
chr10	123898537	123898924	388	12307	TACC2	ENSG00000138162	43.3971	61.3782	17.9811	44.989	3.29381	0.0730081	chr5	78365664	78365830	167	73	BHMT2	ENSG00000132840	28.7794	15.0712	-13.7082	-41.2546	-3.00643	0.0560726
chr10	124913434	124913446	13	-346	BUB3	ENSG00000154473	33.1614	53.536	20.3746	10.433	3.49863	0.0588276	chr5	78533917	78534387	471	1904	JMY	ENSG00000152409	56.747	27.56	-29.187	-24.8995	-3.29309	0.0664656
chr10	126213601	126214028	428	63188	LHPP	ENSG00000107902	66.5254	87.539	21.0136	57.1051	3.54437	0.062519	chr5	79141366	79142105	740	144962	MTX3	ENSG00000177034	64.2327	40.7748	-23.4579	-32.8312	-3.35696	0.0569462
chr10	127103593	127104230	638	-253962	CTBP2	ENSG00000175029	40.1929	57.6568	17.4639	57.8643	3.56216	0.0556627	chr5	79387616	79388245	630	55769	THBS4	ENSG00000113296	54.7441	31.266	-23.4781	-63.1619	-3.00297	0.0690367
chr10	128080020	128080199	180	-2995	ADAM12	ENSG00000148848	29.9332	48.6207	18.6876	12.1717	3.07132	0.0559652	chr5	79452244	79452453	210	99384	SERINC5	ENSG00000164300	83.0894	67.0685	-16.0208	-12.4285	-3.07723	0.0561818
chr10	128842182	128843014	833	132258	FAM196A	ENSG00000188916	50.5642	78.4472	27.883	82.7812	5.7776	0.0590961	chr5	79553407	79553893	487	-1508	SERINC5	ENSG00000164300	64.2439	38.9643	-25.2797	-75.6203	-3.13815	0.0638147
chr10	128992778	128993278	501	1143	FAM196A	ENSG00000188916	20.8267	51.8206	30.9939	79.5038	4.47763	0.0639586	chr5	79951586	79951645	60	-783	DHFR	ENSG00000228716	83.8616	63.7635	-20.0981	-10.3359	-3.35988	0.0577715
chr10	129152090	129152936	847	-157667	FAM196A	ENSG00000188916	55.0314	76.7723	21.7409	54.5909	3.76527	0.0552254	chr5	80255658	80255793	136	-697	RASGRF2	ENSG00000113319	68.3608	46.8387	-21.5221	-33.0151	-3.28729	0.0602263
chr10	129216891	129217359	469	-130253	NPS	ENSG00000214285	68.754	88.4596	19.7056	32.5946	3.4017	0.0552254	chr5	81146513	81146917	405	-99440	SSBP2	ENSG00000145687	62.1972	39.4063	-22.7909	-25.0891	-3.57244	0.0586256
chr10	131216384	131216454	71	-48993	MGMT	ENSG00000170430	30.172	59.6378	29.4658	15.9392	3.19799	0.0877371	chr5	88184557	88184869	313	-4171	MEF2C	ENSG00000081189	63.3203	36.0387	-27.2816	-11.5432	-3.1818	0.0613256
chr10	131403710	131404778	1069	-94184	AL355531.2	ENSG00000268421	57.5637	85.2091	27.6454	109.492	4.30927	0.0705934	chr5	89704089	89704369	281	1179	CETN3	ENSG00000153140	66.6113	45.4196	-21.1917	-13.2773	-3.10386	0.0587631
chr10	132002343	132002624	282	67679	GLRX3	ENSG00000108010	43.3061	63.7443	20.4382	18.5131	3.80404	0.0582472	chr5	91896247	91896519	273	-1022523	NR2F1	ENSG00000175745	78.2306	49.5503	-28.6803	-9.55209	-3.06486	0.0559792
chr10	132733271	132733615	345	376368	TCERG1L	ENSG00000176769	21.4294	40.7845	19.3551	21.6594	3.1292	0.0554386	chr5	91896858	91897021	164	-1022021	NR2F1	ENSG00000175745	74.0731	43.608	-30.4651	-10.5941	-3.50843	0.0560019
chr10	132907670	132908251	582	201732	TCERG1L	ENSG00000176769	20.8267	39.8364	19.0097	68.797	3.45313	0.0556243	chr5	92466258	92466609	352	-452433	NR2F1	ENSG00000175745	68.758	47.3159	-21.4422	-12.8234	-3.05569	0.0594692
chr10	133253049	133253129	81	-143064	TCERG1L	ENSG00000176769	6.79874	26.5479	19.7492	15.2805	3.07415	0.0618342	chr5	92467013	92467650	638	-451392	NR2F1	ENSG00000175745	72.0294	50.0573	-21.9721	-23.0015	-3.02921	0.0594692
chr10	134002090	134002240	151	1685	DPYSL4	ENSG00000151640	28.0617	51.7782	23.7166	16.008	3.25052	0.0689592	chr5	92906447	92907217	771	-11825	NR2F1	ENSG00000175745	51.0795	6.88915	-44.1903	-209.043	-3.01925	0.108135
chr10	134133454	134133844	391	11481	STK32C	ENSG00000165752	24.1522	42.1952	18.0429	19.4588	3.30609	0.0578321	chr5	92957687	92957745	59	38643	NR2F1	ENSG00000175745	41.5374	21.2726	-20.2648	-9.1756	-3.00039	0.0615649
chr10	134293365	134293728	364	34671	C10orf91	ENSG00000180066	58.6554	82.305	23.6496	36.6621	3.4783	0.0652185	chr5	95193073	95193516	444	5136	C5orf27	ENSG00000236882	55.2359	34.6986	-20.5373	-32.6392	-3.02421	0.0573766
chr10	134560109	134560360	252	-18967	INPP5A	ENSG00000068383	31.7905	50.1119	18.3214	37.9399	3.26347	0.0600576	chr5	102454018	102454268	251	1532	GIN1	ENSG00000145723	66.0817	46.1061	-19.9756	-9.42295	-3.03868	0.0562157
chr11	1056663	1056980	318	-17894	MUC2	ENSG00000198788	41.7984	62.5794	20.781	45.9601	3.85437	0.0559287	chr5	102596081	102596100	20	955	C5orf30	ENSG00000181751	54.0978	33.3123	-20.7856	-9.91115	-3.13878	0.0625205
chr11	1325426	1326214	789	-1405	TOLLIP	ENSG00000078902	38.3788	74.8692	36.4903	106.231	5.29402	0.074348	chr5	110411737	110412017	281	2724	TSLP	ENSG00000145777	75.9888	55.4492	-20.5396	-12.7576	-3.10376	0.0612554
chr11	1479879	1480641	763	7963	BRSK2	ENSG00000174672	44.7981	67.0932	22.2951	84.2953	4.07971	0.056929	chr5	110561667	110561928	262	1882	CAMK4	ENSG00000152495	84.2895	63.1125	-21.1769	-15.8898	-3.52191	0.0587597
chr11	1546388	1546746	359	-38411	MOB2	ENSG00000182208	65.5707	89.6525	24.0818	45.9127	4.15272	0.06114	chr5	111089861	111090680	820	1267	NREP	ENSG00000134986	49.2854	22.2244	-27.061	-20.6855	-3.01044	0.0592941
chr11	1580837	1581268	432	5897	DUSP8	ENSG00000184545	42.6969	66.0727	23.3758	56.0259	3.68701	0.0611583	chr5	112044656	112044922	267	1436	APC	ENSG00000134982	38.3666	18.7987	-19.5678	-13.5721	-3.12206	0.0564431
chr11	1712711	1713001	291	-5423	KRTAP5-6	ENSG00000205864	37.6509	56.4767	18.8257	49.3921	3.30533	0.0593678	chr5	112074547	112074691	145	517	APC	ENSG00000134982	60.7997	40.4808	-20.3189	-10.1775	-3.24704	0.058449
chr11	2157028	2157595	568	921	IGF2	ENSG00000167244	61.6553	80.7215	19.0663	49.4389	3.52023	0.0720149	chr5	114938545	114938581	37	-368	TICAM2	ENSG00000243414	65.9398	42.799	-23.1408	-10.3259	-3.40478	0.0599302
chr11	2336490	2336892	403	12391	TSPAN32	ENSG00000064201	41.6129	65.0392	23.4263	51.6626	3.8335	0.0588527	chr5	118324567	118325018	452	-326	DTWD2	ENSG00000169570	47.4089	22.1737	-25.2352	-61.0594	-3.0792	0.0574808
chr11	2737927	2737994	68	168984	CDKN1C	ENSG00000129757	44.3577	62.1968	17.8391	18.1108	3.02046	0.0602	chr5	119798890	119799384	495	-588	PRR16	ENSG00000184838	66.594	39.8914	-26.7026	-21.0103	-3.07733	0.0667051
chr11	2799686	2800586	901	106392	CDKN1C	ENSG00000129757	41.3951	69.0803	27.6852	118.377	4.25772	0.0703917	chr5	121649459	121649876	418	1196	SNCAIP	ENSG00000064692	67.2587	35.9644	-31.2943	-30.202	-4.7663	0.0578897
chr11	2831818	2833138	1321	73840	CDKN1C	ENSG00000129757	39.2866	68.8898	29.6032	169.166	5.05895	0.0708872	chr5	122110222	122110393	172	-297	SNX2	ENSG00000205302	53.929	26.3473	-27.5817	-21.0191	-3.69216	0.0605954
chr11	3664560	3664607	48	-1013	ART5	ENSG00000167311	38.0809	53.3264	15.2454	12.3651	3.10804	0.0588511	chr5	122112186	122112483	298	1287	SNX2	ENSG00000205302	62.5147	39.3291	-23.1856	-13.6506	-3.00438	0.0611966
chr11	6302202	6302500	299	21045	CCKBR	ENSG00000110148	48.4465	67.388	18.9416	37.2049	3.1654	0.0588242	chr5	122426703	122427742	1040	1886	PRDM6	ENSG00000061455	73.7833	48.3528	-25.4305	-116.453	-3.08671	0.058763
chr11	6649603	6649905	303	-8910	TPP1	ENSG00000166340	59.8317	81.1538	21.3221	14.2464	3.86588	0.0558533	chr5	123941179	123941976	798	138237	ZNF608	ENSG00000168916	72.1467	50.1863	-21.9604	-44.3342	-3.43098	0.0597572
chr11	8228074	8228231	158	-37471	RIC3	ENSG00000166405	40.9186	62.3961	21.4775	27.3749	3.06682	0.0628614	chr5	126017766	126018145	380	50351	C5orf48	ENSG00000196900	69.8403	52.4205	-17.4198	-22.0168	-3.06884	0.0619613
chr11	11829566	11829827	262	-33142	USP47	ENSG00000170242	19.1778	37.2533	18.0755	18.4384	3.09327	0.0608077	chr5	126187174	126188064	891	65855	2003-03-01	ENSG00000173926	76.8388	37.8446	-38.9942	-65.4886	-3.11234	0.0906656
chr11	12180193	12180798	606	-2191	MICAL2	ENSG00000133816	30.5383	52.1936	21.6553	29.9718	3.51574	0.0688241	chr5	126565805	126565849	45	-60673	MEGF10	ENSG00000145794	55.0293	44.517	-10.5123	-9.38673	-3.05049	0.0559792
chr11	12241062	12241566	505	57358	MICAL2	ENSG00000133816	45.1984	64.2605	19.0621	32.8517	3.45074	0.0556113	chr5	127421234	127421367	134	1693	SLC12A2	ENSG00000064651	48.5675	25.1859	-23.3816	-14.8741	-3.57302	0.061148
chr11	12340130	12341111	982	31682	MICALCL	ENSG00000133808	29.7398	50.6307	20.8909	54.7004	4.01173	0.0560553	chr5	129239049	129239339	291	-825	CHSY3	ENSG00000198108	67.188	49.227	-17.961	-14.4414	-3.04694	0.0587296
chr11	12341564	12341847	284	33116	MICALCL	ENSG00000133808	39.2268	58.4819	19.2551	10.0137	3.57707	0.0560553	chr5	131824985	131825318	334	18	IRF1	ENSG00000125347	42.0108	17.9286	-24.0822	-25.6647	-3.10251	0.062557
chr11	12935897	12936101	205	34906	TEAD1	ENSG00000187079	56.261	74.8597	18.5987	15.4063	3.10918	0.0559045	chr5	132201507	132201619	113	-632	UQCRQ	ENSG00000164405	58.7493	39.7563	-18.993	-16.8215	-3.18035	0.0584559
chr11	16810507	16811005	499	23024	PLEKHA7	ENSG00000166689	47.7456	73.5704	25.8248	62.4133	4.14741	0.0681011	chr5	132384775	132385087	313	-2566	HSPA4	ENSG00000170606	64.1817	42.0694	-22.1123	-22.8337	-3.07225	0.0568549
chr11	20049044	20049403	360	4407	NAV2	ENSG00000166833	44.3237	63.1598	18.8361	19.5285	3.34214	0.0658431	chr5	132816265	132817208	944	102123	FSTL4	ENSG00000053108	64.5277	45.0519	-19.4758	-63.4734	-3.02369	0.0561986
chr11	20410592	20410792	201	1329	PRMT3	ENSG00000185238	44.6616	65.8635	21.2018	15.3099	3.95802	0.0568213	chr5	132845909	132846565	657	72766	FSTL4	ENSG00000053108	47.77	32.7359	-15.0341	-31.1455	-3.04737	0.0579902
chr11	28915497	28915595	99	783637	METTL15	ENSG00000169519	37.595	57.5211	19.9261	10.1238	3.45681	0.0575113	chr5	133266034	133266438	405	38039	C5orf15	ENSG00000113583	69.723	52.819	-16.904	-38.6676	-3.03071	0.0559792
chr11	28916116	28916376	261	784256	METTL15	ENSG00000169519	35.5144	56.9306	21.4163	26.1699	3.77072	0.0563751	chr5	133304895	133304995	101	-416	C5orf15	ENSG00000113583	63.0949	42.8477	-20.2472	-13.5079	-3.0619	0.0571272
chr11	31394232	31394437	206	2827	DNAJC24	ENSG00000170946	47.7082	72.841	25.1328	10.074	3.38154	0.0700548	chr5	133341627	133341714	88	-802	VDAC1	ENSG00000213585	50.4757	33.1342	-17.3415	-12.575	-3.08947	0.0559909
chr11	33719644	33720044	401	1898	C11orf91	ENSG00000205177	58.3134	80.133	21.8196	19.574	3.44589	0.0641983	chr5	133864098	133864267	170	1770	JADE2	ENSG00000043143	60.9035	37.6255	-23.278	-9.50455	-3.02638	0.0574666
chr11	34621852	34622831	980	-19826	EHF	ENSG00000135373	28.6027	46.1383	17.5356	41.9044	3.30636	0.0567978	chr5	133983237	133983570	334	-908	SEC24A	ENSG00000113615	63.8358	41.0568	-22.779	-23.6935	-3.16818	0.057559
chr11	35439965	35440158	194	458	SLC1A2	ENSG00000110436	22.3506	54.2496	31.899	63.399	3.24423	0.0978508	chr5	134239853	134239893	41	-702	PCBD2	ENSG00000132570	73.6411	51.3845	-22.2566	-20.5587	-3.13953	0.0583379
chr11	45203519	45203703	185	90	PRDM11	ENSG00000019485	39.7127	60.9005	21.1877	16.058	3.35238	0.0594715	chr5	134373714	134374163	450	-3210	PITX1	ENSG00000069011	69.0947	33.1763	-35.9184	-44.9344	-3.05985	0.0776398
chr11	45670133	45670917	785	16254	CHST1	ENSG00000175264	43.2652	70.4743	27.2091	81.1196	4.4891	0.0639494	chr5	134527549	134527594	46	-146034	C5orf66	ENSG00000224186	64.3315	43.0261	-21.3054	-9.64007	-3.06919	0.0561809
chr11	46261283	46261374	92	-37837	CREB3L1	ENSG00000157613	33.2033	49.2301	16.0269	12.2449	3.08589	0.0560917	chr5	134600970	134601389	420	-72239	C5orf66	ENSG00000224186	69.8097	40.0708	-29.7388	-41.0464	-3.05897	0.084173
chr11	46409428	46409629	202	-1320	CHRM4	ENSG00000180720	27.8029	45.6023	17.7994	23.3133	3.39487	0.0580716	chr5	134878887	134879072	186	-7247	NEUROG1	ENSG00000181965	38.2359	10.4942	-27.7417	-21.9396	-4.21082	0.0607722
chr11	59381650	59381941	292	1675	OSBP	ENSG00000110048	45.9229	63.7456	17.8227	10.759	3.86118	0.0571754	chr5	134912695	134912903	209	1850	CXCL14	ENSG00000145824	54.7937	35.7794	-19.0142	-10.7427	-3.47722	0.0573167
chr11	62165728	62166121	394	-6453	SCGB1A1	ENSG00000149021	40.0203	64.8403	24.8199	25.758	3.30989	0.0669219	chr5	137224423	137224967	545	-157	PKD2L2	ENSG00000078795	43.0712	21.5959	-21.4753	-54.8259	-3.03926	0.0597261
chr11	62211459	62211616	158	24951	SCGB1A1	ENSG00000149021	50.077	69.6502	19.5732	25.0907	3.22241	0.0605094	chr5	137610720	137610988	269	-359	GFRA3	ENSG00000146013	51.009	27.615	-23.394	-20.315	-3.28135	0.0572318
chr11	62239996	62240338	343	53488	SCGB1A1	ENSG00000149021	66.3325	85.6036	19.2711	13.1034	3.50906	0.055617	chr5	138284374	138284712	339	18046	CTNNA1	ENSG00000044115	76.5862	53.5224	-23.0638	-31.5394	-3.01648	0.08148
chr11	62247200	62247249	50	56329	AHNAK	ENSG00000124942	41.9154	63.2058	21.2903	14.0133	3.51457	0.0586034	chr5	138534532	138534766	235	-444	SIL1	ENSG00000120725	76.3219	54.0319	-22.29	-36.0299	-3.07271	0.0559792
chr11	62476046	62476246	201	289	BSCL2	ENSG00000168000	46.6694	63.7229	17.0536	13.1354	3.38204	0.0566482	chr5	138897211	138897400	190	-8615	UBE2D2	ENSG00000131508	53.6359	29.328	-24.3079	-38.5989	-3.02124	0.0578414
chr11	62573814	62573880	67	-39	NXF1	ENSG00000162231	45.3828	62.8813	17.4985	9.34355	3.19471	0.0582539	chr5	138942503	138943024	522	888	UBE2D2	ENSG00000131508	55.7908	29.3748	-26.4161	-24.7764	-3.17688	0.0613902
chr11	62621174	62621258	85	-2259	SLC3A2	ENSG00000168003	38.5161	56.957	18.4409	9.27975	3.09883	0.0565463	chr5	139144725	139144903	179	-30502	PSD2	ENSG00000146005	35.3509	20.4769	-14.874	-16.9809	-3.03927	0.0573005
chr11	64871352	64871888	537	-4927	VPS51	ENSG00000149823	31.7487	58.689	26.9403	28.5998	3.831	0.06705	chr5	139486255	139486775	521	-6932	PURA	ENSG00000185129	67.7549	41.2819	-26.473	-64.2632	-3.04319	0.0649119
chr11	64872251	64872775	525	-4040	VPS51	ENSG00000149823	42.2914	71.2384	28.947	46.1416	4.31662	0.06705	chr5	139494526	139494687	162	817	PURA	ENSG00000185129	55.5995	29.6194	-25.9801	-29.1781	-3.27274	0.0566159
chr11	65125165	65125883	719	2926	TIGD3	ENSG00000173825	38.7169	63.7315	25.0146	43.9387	4.86972	0.0570067	chr5	139537282	139537517	236	-16709	CYSTM1	ENSG00000120306	46.1668	29.0282	-17.1386	-55.4954	-3.03382	0.0561937
chr11	65352262	65353000	739	2891	EHBP1L1	ENSG00000173442	54.9493	75.9572	21.0079	381.767	4.39351	0.0671282	chr5	139926562	139926653	92	-597	EIF4EBP3	ENSG00000243056	72.3724	52.1494	-20.2231	-23.9054	-3.20915	0.056022
chr11	66072042	66072773	732	11741	CD248	ENSG00000174807	35.2869	59.7612	24.4743	42.8981	3.80096	0.0604012	chr5	139948710	139949004	295	4233	SLC35A4	ENSG00000176087	88.3209	64.6968	-23.6242	-19.0258	-3.29617	0.0602816
chr11	66721094	66721723	630	4123	PC	ENSG00000173599	57.9328	74.5695	16.6367	35.0286	3.67002	0.0560828	chr5	140645652	140645798	147	20504	PCDHB15	ENSG00000113248	60.1454	44.6535	-15.4919	-9.41913	-3.11055	0.0584991
chr11	67138872	67139346	475	1861	CLCF1	ENSG00000175505	25.995	55.0836	29.0886	25.7145	4.16724	0.0756281	chr5	141015283	141015668	386	731	HDAC3	ENSG00000171720	61.9762	35.0458	-26.9304	-48.9125	-3.50488	0.0578227
chr11	67158285	67158476	192	-946	RAD9A	ENSG00000172613	34.8559	54.8851	20.0292	27.4979	3.76584	0.0623235	chr5	141692832	141693878	1047	9868	SPRY4	ENSG00000187678	80.6385	47.747	-32.8915	-108.931	-3.03578	0.0626847
chr11	67373305	67373572	268	0	C11orf72	ENSG00000184224	23.8101	45.8004	21.9903	20.055	3.54836	0.0682989	chr5	141818696	141818956	261	-114090	SPRY4	ENSG00000187678	70.8936	51.7656	-19.128	-15.3317	-3.04014	0.0578819
chr11	67815229	67815863	635	-1649	TCIRG1	ENSG00000110719	60.5465	81.8807	21.3342	108.4	5.88429	0.0558503	chr5	141947776	141948346	571	52560	FGF1	ENSG00000113578	45.4741	27.8653	-17.6089	-22.2671	-3.01833	0.061944
chr11	67906220	67906396	177	-17308	CHKA	ENSG00000110721	50.2939	69.1742	18.8802	9.21753	3.11893	0.0603844	chr5	142151341	142151469	129	-812	ARHGAP26	ENSG00000145819	38.5219	19.6966	-18.8253	-10.4892	-3.17001	0.0587925
chr11	68095405	68095766	362	15327	LRP5	ENSG00000162337	42.5115	62.8299	20.3183	42.6399	3.77655	0.0626726	chr5	142586961	142587070	110	195	ARHGAP26	ENSG00000145819	86.6139	66.4052	-20.2087	-14.0109	-3.04481	0.0584954
chr11	69234963	69235282	320	173337	MYEOV	ENSG00000172927	37.3387	58.4579	21.1192	12.5573	3.19829	0.0671389	chr5	142587389	142588283	895	623	ARHGAP26	ENSG00000145819	81.0825	36.777	-44.3055	-123.718	-6.29497	0.0614069
chr11	69274207	69274457	251	-181397	CCND1	ENSG00000110092	42.4641	61.0969	18.6327	12.8234	3.37201	0.0566448	chr5	145314627	145314950	324	-1191	SH3RF2	ENSG00000156463	61.3657	45.8603	-15.5054	-12.2068	-3.01041	0.0617797
chr11	69649013	69649497	485	-15220	FGF3	ENSG00000186895	37.8418	63.4616	25.6198	54.3471	4.24105	0.0664998	chr5	145562886	145562924	39	-662	LARS	ENSG00000133706	54.9682	36.3309	-18.6373	-9.74315	-3.12195	0.0559792
chr11	69720346	69721180	835	-86553	FGF3	ENSG00000186895	40.3736	63.7457	23.3721	51.8763	3.6856	0.0628161	chr5	148835647	148835858	212	56861	CSNK1A1	ENSG00000113712	73.1783	53.4202	-19.7581	-18.3947	-3.00094	0.0567739
chr11	70347354	70347822	469	1141	SHANK2	ENSG00000162105	47.3332	66.9662	19.633	48.9165	3.44496	0.0584214	chr5	149020536	149021199	664	59499	ARHGEF37	ENSG00000183111	48.8462	27.6208	-21.2254	-69.9402	-3.00218	0.0630794
chr11	71199180	71199665	486	8839	NADSYN1	ENSG00000172890	32.8026	53.295	20.4925	46.3445	3.44994	0.0622046	chr5	149112175	149112558	384	2300	PPARGC1B	ENSG00000155846	56.3583	31.9343	-24.424	-44.1459	-3.18757	0.0628031
chr11	71648168	71648635	468	8039	RNF121	ENSG00000137522	63.1219	80.8223	17.7005	27.7983	3.16437	0.0556113	chr5	149339535	149339600	66	-699	SLC26A2	ENSG00000155850	47.4817	31.2861	-16.1956	-12.9545	-3.17615	0.0603512
chr11	72439357	72439661	305	-1183	ARAP1	ENSG00000186635	53.2225	72.5778	19.3553	23.5872	3.51316	0.0610866	chr5	150401372	150401848	477	1204	GPX3	ENSG00000211445	73.6575	45.0144	-28.6431	-37.5104	-3.18644	0.0677064
chr11	74177798	74177898	101	695	KCNE3	ENSG00000175538	43.5146	66.0741	22.5595	17.1215	3.57727	0.0577809	chr5	150617809	150618405	597	-14047	GM2A	ENSG00000196743	59.9112	38.7814	-21.1297	-68.6703	-3.02016	0.0726119
chr11	75588308	75588499	192	-948	UVRAG	ENSG00000198382	71.6411	94.292	22.6509	32.6936	4.26005	0.0582163	chr5	150912339	150912409	71	-805	FAT2	ENSG00000086570	61.902	46.6941	-15.2079	-12.6451	-3.12236	0.0562988
chr11	76911517	76911918	402	20645	MYO7A	ENSG00000137474	49.4833	70.3296	20.8464	15.0207	4.06467	0.0560571	chr5	151077854	151077992	139	-11127	SPARC	ENSG00000113140	69.5678	49.0227	-20.5451	-12.2504	-3.03545	0.0601896
chr11	77535073	77535505	433	2839	AAMDC	ENSG00000087884	50.9253	78.1561	27.2308	12.6585	4.50047	0.0626335	chr5	153991073	153991550	478	-100911	LARP1	ENSG00000155506	39.7422	14.228	-25.5143	-54.8101	-3.08605	0.0624558
chr11	78649972	78650832	861	-35040	TENM4	ENSG00000149256	46.9028	71.7561	24.8533	35.7125	3.30144	0.0561415	chr5	154026331	154026781	451	-65680	LARP1	ENSG00000155506	64.3387	39.5595	-24.7792	-117.61	-3.10491	0.060784
chr11	82683928	82684102	175	-2301	PRCP	ENSG00000137509	56.2131	74.7877	18.5746	10.4978	3.51971	0.0571826	chr5	156966901	156968440	1540	34308	ADAM19	ENSG00000135074	70.8931	41.4486	-29.4445	-73.826	-3.00184	0.0664373
chr11	82843355	82843805	451	-24224	PCF11	ENSG00000165494	38.6363	61.6708	23.0345	34.025	3.69908	0.0705954	chr5	156981256	156981576	321	21172	ADAM19	ENSG00000135074	71.6005	45.1709	-26.4296	-23.5501	-3.23172	0.0613007
chr11	86510363	86510915	553	-366	PRSS23	ENSG00000150687	38.4991	70.079	31.5799	50.3078	5.10083	0.065499	chr5	157000993	157001533	541	1215	ADAM19	ENSG00000135074	51.6515	21.4633	-30.1882	-69.1079	-3.00514	0.062082
chr11	93270288	93271195	908	0	SMCO4	ENSG00000166002	39.5554	63.8256	24.2701	64.7265	4.61502	0.0595124	chr5	157949608	157950006	399	576694	EBF1	ENSG00000164330	54.6283	36.1995	-18.4288	-20.7613	-3.88622	0.0631091
chr11	93477901	93478570	670	-424	C11orf54	ENSG00000182919	26.179	48.9605	22.7815	52.8332	3.94078	0.0630571	chr5	158166893	158167649	757	359051	EBF1	ENSG00000164330	57.743	39.6023	-18.1407	-53.0089	-3.29223	0.0565791
chr11	94886601	94887006	406	63626	ENDOD1	ENSG00000149218	37.8802	62.1801	24.2999	17.2452	3.58122	0.0646155	chr5	158438104	158438572	469	88128	EBF1	ENSG00000164330	69.7142	43.3645	-26.3496	-36.5749	-3.00114	0.0749919
chr11	95658195	95658212	18	-735	MTMR2	ENSG00000087053	54.5656	70.2011	15.6355	9.64121	3.30498	0.0581914	chr5	158559976	158560521	546	-33206	EBF1	ENSG00000164330	48.825	35.3064	-13.5187	-33.9656	-3.02914	0.0559792
chr11	101917467	101917617	151	-556	C11orf70	ENSG00000137691	46.6191	73.5023	26.8831	37.672	5.0159	0.0559379	chr5	159339468	159340265	798	-3524	ADRA1B	ENSG00000170214	75.1956	54.1365	-21.0591	-30.5786	-3.0132	0.0590865
chr11	101919207	101919709	503	1017	C11orf70	ENSG00000137691	39.7336	66.2202	26.4866	25.9512	5.19774	0.0603838	chr5	159560256	159561029	774	-13825	PWWP2A	ENSG00000170234	47.3141	21.0437	-26.2704	-108.949	-3.03702	0.0767367
chr11	111828224	111828660	437	-19372	DIXDC1	ENSG00000150764	61.0725	81.4062	20.3337	27.0591	3.71867	0.0556891	chr5	159827651	159827799	149	-546	C5orf54	ENSG00000221886	72.4847	50.882	-21.6027	-14.5183	-3.52323	0.060852
chr11	117054667	117055017	351	4262	SIDT2	ENSG00000149577	70.3534	88.8466	18.4933	23.5216	3.46407	0.0556113	chr5	159894414	159894731	318	45496	PTTG1	ENSG00000164611	39.5108	25.1792	-14.3316	-12.2024	-3.00596	0.0615653
chr11	117848935	117849886	952	-7176	IL10RA	ENSG00000110324	29.7728	68.837	39.0642	139.733	3.59633	0.101259	chr5	162929657	162929830	174	-289	MAT2B	ENSG00000038274	59.1736	35.8451	-23.3284	-17.1596	-3.15452	0.0585727
chr11	118899576	118900337	762	1233	SLC37A4	ENSG00000137700	45.944	75.6046	29.6606	46.0967	4.64079	0.0680433	chr5	167836712	167837289	578	3427	WWC1	ENSG00000113645	55.4174	26.7856	-28.6319	-60.511	-3.41323	0.0768101
chr11	119587145	119587610	466	11652	PVRL1	ENSG00000110400	58.6449	74.828	16.1831	56.5696	3.24522	0.0587001	chr5	169299701	169300088	388	107655	FAM196B	ENSG00000204767	71.7087	48.2051	-23.5036	-17.4531	-3.35691	0.059097
chr11	120204892	120205169	278	-2617	ARHGEF12	ENSG00000196914	29.9675	62.0147	32.0471	17.966	6.50656	0.0558927	chr5	169300398	169301138	741	106605	FAM196B	ENSG00000204767	71.226	48.3205	-22.9055	-37.3225	-3.06199	0.059097
chr11	120858975	120859279	305	-35501	TBCEL	ENSG00000154114	43.4792	65.0386	21.5595	25.8895	3.38084	0.0611315	chr5	169405700	169406577	878	1166	FAM196B	ENSG00000204767	45.447	25.0585	-20.3885	-49.8069	-3.13422	0.0559803
chr11	122536389	122536811	423	10005	UBASH3B	ENSG00000154127	41.0426	67.2329	26.1903	22.5329	3.33487	0.0728423	chr5	170872776	170873571	796	26115	FGF18	ENSG00000156427	60.4087	41.8617	-18.547	-51.0066	-3.01579	0.0563604
chr11	122977036	122977524	489	-43097	HSPA8	ENSG00000109971	63.1902	85.9368	22.7465	68.666	4.55638	0.0580735	chr5	170877188	170877508	321	30527	FGF18	ENSG00000156427	49.3781	26.3361	-23.0419	-40.0995	-3.56608	0.0562092
chr11	125134096	125134193	98	-65961	PKNOX2	ENSG00000165495	41.6658	60.5581	18.8923	10.2046	3.71244	0.0626095	chr5	170921062	170921359	298	74401	FGF18	ENSG00000156427	60.0731	41.6331	-18.44	-22.6377	-3.47484	0.0564658
chr11	126189539	126190236	698	-15325	RP11-712L6.5	ENSG00000255062	44.2738	69.4228	25.149	50.7778	4.3003	0.0620898	chr5	171094776	171095407	632	-105248	CTB-78H18.1	ENSG00000253110	69.1421	51.1581	-17.984	-121.857	-3.06036	0.0769804
chr11	130290399	130291242	844	7645	ADAMTS8	ENSG00000134917	32.8451	65.0104	32.1652	74.8806	4.85788	0.0641531	chr5	171369123	171369395	273	35364	FBXW11	ENSG00000072803	80.0378	61.0101	-19.0277	-9.14332	-3.02886	0.0576164
chr11	130337799	130338051	253	18929	ADAMTS15	ENSG00000166106	39.4826	58.8434	19.3608	18.5723	3.17365	0.0723028	chr5	171839814	171840498	685	40863	SH3PXD2B	ENSG00000174705	63.342	36.0241	-27.3179	-74.8627	-3.43916	0.0652598
chr11	130358409	130359188	780	39539	ADAMTS15	ENSG00000166106	43.9236	68.0994	24.1758	44.3668	3.95649	0.0595811	chr5	172043802	172044551	750	-7365	AC027309.1	ENSG00000268553	58.5486	31.7488	-26.7998	-125.651	-3.13267	0.0602709
chr12	828236	828991	756	-32767	WNK1	ENSG00000060237	50.8284	73.4845	22.6561	67.9019	4.41691	0.0559477	chr5	172175321	172175765	445	22432	DUSP1	ENSG00000120129	74.7221	50.5815	-24.1407	-121.172	-3.05181	0.0737301
chr12	1505498	1506306	809	-11051	ERC1	ENSG00000082805	68.4322	88.0448	19.6125	37.7255	3.52646	0.0550258	chr5	172314526	172314800	275	-17419	ERGIC1	ENSG00000113719	78.4513	56.5834	-21.8679	-15.1863	-3.005	0.0581609
chr12	1822953	1823905	953	22759	ADIPOR2	ENSG00000006831	73.3572	93.375	20.0178	86.2318	3.58337	0.0530016	chr5	172400478	172401415	938	-9344	ATP6V0E1	ENSG00000113732	72.2694	44.2544	-28.015	-62.478	-3.68614	0.0560952
chr12	2041089	2041750	662	-13086	CACNA2D4	ENSG00000151062	39.4451	64.9409	25.4958	105.485	5.44122	0.0536747	chr5	172443642	172443774	133	32807	ATP6V0E1	ENSG00000113732	90.0454	65.7761	-24.2693	-13.3722	-3.25024	0.0588862
chr12	2339384	2339469	86	176654	CACNA1C	ENSG00000151067	49.4702	65.9823	16.5121	39.5839	3.07112	0.0637917	chr5	172447638	172448274	637	-35080	CREBRF	ENSG00000164463	62.3101	32.1443	-30.1659	-52.2043	-3.24531	0.0686998
chr12	3073024	3073450	427	3940	TEAD4	ENSG00000197905	41.4901	60.3592	18.8691	45.9767	3.39414	0.0531481	chr5	172862946	172863058	113	-106439	STC2	ENSG00000113739	51.2103	30.6397	-20.5706	-12.0863	-3.01242	0.0655262
chr12	3178968	3179543	576	-6977	TSPAN9	ENSG00000011105	39.8813	61.9603	22.0791	23.2597	3.42755	0.0598902	chr5	172904729	172905450	722	136404	BOD1	ENSG00000145919	59.8383	38.7854	-21.053	-65.5848	-3.07266	0.0570971
chr12	3373257	3373614	358	62915	TSPAN9	ENSG00000011105	34.1279	55.2661	21.1381	44.2897	3.24171	0.064021	chr5	173009599	173009858	260	31996	BOD1	ENSG00000145919	66.6396	47.2158	-19.4237	-21.3947	-3.00163	0.068677
chr12	5917499	5917738	240	-68364	ANO2	ENSG00000047617	23.9055	44.9226	21.0171	27.1398	3.02234	0.0657881	chr5	173044329	173044411	83	-665	BOD1	ENSG00000145919	72.5216	49.7307	-22.7909	-14.2319	-3.46483	0.0635032
chr12	6290914	6291474	561	-17406	CD9	ENSG00000010278	33.3245	51.8396	18.5151	52.492	3.56685	0.0567535	chr5	173141723	173142359	637	-98059	BOD1	ENSG00000145919	60.7719	45.1243	-15.6477	-29.5005	-3.03283	0.0564922
chr12	6420378	6420487	110	278	PLEKHG6	ENSG00000008323	50.8	67.9958	17.1958	12.8335	3.30195	0.0535048	chr5	173316346	173316748	403	0	CPEB4	ENSG00000113742	65.3182	44.301	-21.0172	-21.0767	-3.0323	0.0569434
chr12	7863853	7864313	461	0	DPPA3	ENSG00000187569	35.4913	61.9812	26.4899	49.5771	3.91954	0.0638762	chr5	173317107	173317945	839	0	CPEB4	ENSG00000113742	71.8414	43.2914	-28.55	-101.46	-3.94024	0.0569434
chr12	12044726	12044964	239	5854	ETV6	ENSG00000139083	64.3793	82.8661	18.4868	22.5724	3.26217	0.0533568	chr5	173318556	173319028	473	-875	CPEB4	ENSG00000113742	64.3844	42.2864	-22.098	-11.0813	-3.06957	0.0569434
chr12	12867207	12867337	131	-2720	CDKN1B	ENSG00000111276	13.435	32.7651	19.3301	24.5511	3.07472	0.0611735	chr5	173958596	173959124	529	-192411	MSX2	ENSG00000120149	72.9337	55.4321	-17.5016	-32.6894	-3.0002	0.0619478
chr12	12911262	12912641	1380	-25899	APOLD1	ENSG00000178878	58.8824	80.0827	21.2003	96.0028	4.82992	0.0530016	chr5	175578755	175579136	382	66845	FAM153B	ENSG00000182230	59.2478	37.3371	-21.9107	-21.3964	-3.38304	0.070688
chr12	13254780	13254805	26	1770	GSG1	ENSG00000111305	33.0549	44.8492	11.7944	9.2771	3.13126	0.05349	chr5	176139053	176139879	827	64431	TSPAN17	ENSG00000048140	37.0073	17.4351	-19.5723	-62.0254	-3.00889	0.0581007
chr12	14132794	14132940	147	112	GRIN2B	ENSG00000273079	27.5858	48.5622	20.9764	9.59988	3.2829	0.0542549	chr5	176166532	176166897	366	-70580	UNC5A	ENSG00000113763	51.1348	26.3302	-24.8047	-68.975	-3.10755	0.0602384
chr12	14861581	14862466	886	-12061	GUCY2C	ENSG00000070019	20.6986	47.8128	27.1141	47.9885	3.76679	0.0627999	chr5	176816307	176816945	639	4861	SLC34A1	ENSG00000131183	36.2821	16.3524	-19.9297	-54.8265	-3.08035	0.0563336
chr12	20508169	20508335	167	-13843	PDE3A	ENSG00000172572	40.6236	74.5251	33.9016	9.10706	3.0643	0.0601201	chr5	176901202	176901423	222	0	DBN1	ENSG00000113758	42.6353	21.1103	-21.525	-13.0747	-3.11602	0.0572047
chr12	22777318	22777558	241	-450	ETNK1	ENSG00000139163	44.7036	65.6489	20.9453	29.5959	3.90735	0.0645521	chr5	177370731	177370812	82	52430	PROP1	ENSG00000175325	50.3045	33.0892	-17.2153	-12.6777	-3.01485	0.0599163
chr12	25099554	25099736	183	2240	BCAT1	ENSG00000060982	71.4131	90.761	19.3479	21.6676	3.12418	0.0556464	chr5	177548772	177549058	287	8327	N4BP3	ENSG00000145911	65.4628	31.2227	-34.2401	-67.017	-3.05342	0.105955
chr12	27531878	27532701	824	10608	ARNTL2	ENSG00000029153	65.4158	84.4699	19.054	33.8152	3.96559	0.0530016	chr5	177747532	177747911	380	-87745	PHYKPL	ENSG00000175309	62.4336	43.5342	-18.8994	-42.4796	-3.08925	0.0559792
chr12	28124665	28124931	267	0	PTHLH	ENSG00000087494	42.0137	72.3303	30.3166	17.0041	3.46778	0.0700933	chr5	178667980	178668544	565	103886	ADAMTS2	ENSG00000087116	54.8305	36.189	-18.6416	-63.1323	-3.07604	0.0559794
chr12	30908717	30909005	289	-831	CAPRIN2	ENSG00000110888	24.8428	42.4049	17.5621	14.5751	4.04125	0.0533796	chr5	178731495	178731896	402	40534	ADAMTS2	ENSG00000087116	53.3427	35.0969	-18.2458	-22.3074	-3.34437	0.0568472
chr12	30947754	30948500	747	-39868	CAPRIN2	ENSG00000110888	15.5488	43.1766	27.6278	84.1379	6.38436	0.0652689	chr5	178769937	178770408	472	2022	ADAMTS2	ENSG00000087116	51.8105	34.0101	-17.8004	-39.9688	-3.02088	0.0609661
chr12	31418171	31419010	840	58085	FAM60A	ENSG00000139146	36.8956	55.645	18.7494	48.6149	3.43772	0.0549034	chr5	178804046	178804475	430	-31614	ADAMTS2	ENSG00000087116	65.3691	46.6647	-18.7043	-42.3249	-3.0394	0.0726203
chr12	31528319	31528600	282	-48326	FAM60A	ENSG00000139146	62.2432	80.636	18.3928	16.8722	3.47777	0.0540133	chr5	178806048	178806267	220	-33616	ADAMTS2	ENSG00000087116	58.0858	43.191	-14.8949	-15.2314	-3.01704	0.0726203
chr12	41581738	41581828	91	-421	PDZRN4	ENSG00000165966	28.8829	45.8059	16.923	23.0259	3.35557	0.0556034	chr5	178866502	178867145	644	-94070	ADAMTS2	ENSG00000087116	69.4167	49.4061	-20.0106	-99.2163	-3.06394	0.0601425
chr12	43680512	43680963	452	152551	ADAMTS20	ENSG00000173157	61.791	77.9271	16.1361	30.1075	3.88179	0.0530042	chr5	179062926	179063025	100	-1140	HNRNPH1	ENSG00000169045	81.6085	54.7013	-26.9072	-17.2101	-3.34764	0.0793606
chr12	43681287	43682710	1424	150804	ADAMTS20	ENSG00000173157	51.7663	73.1299	21.3635	94.2791	4.69171	0.0531188	chr5	179249992	179250130	139	506	SQSTM1	ENSG00000161011	68.6307	44.9327	-23.698	-12.2921	-3.0216	0.0663189
chr12	44077257	44077557	301	75003	PUS7L	ENSG00000129317	36.255	56.2587	20.0037	17.6471	3.60135	0.0575571	chr5	179750842	179751691	850	6956	GFPT2	ENSG00000131459	71.2843	45.1544	-26.1299	-50.543	-3.22214	0.0559792
chr12	47630910	47630961	52	13581	PCED1B	ENSG00000179715	56.8866	74.2053	17.3186	15.5284	3.17294	0.0545205	chr5	179774331	179774912	582	4987	GFPT2	ENSG00000131459	74.9658	41.9037	-33.0621	-56.9931	-3.18714	0.0773333
chr12	48124121	48124310	190	-4770	ENDOU	ENSG00000111405	43.7757	64.1541	20.3785	33.0678	3.84841	0.0553098	chr5	180213116	180214128	1013	15665	MGAT1	ENSG00000131446	54.6402	31.6951	-22.9451	-84.8863	-3.0446	0.0559792
chr12	48355952	48356662	711	-704	TMEM106C	ENSG00000134291	51.9328	82.7052	30.7724	76.4989	6.20915	0.0611217	chr5	180230565	180230844	280	59	MGAT1	ENSG00000131446	55.7844	27.5226	-28.2619	-50.0809	-3.15131	0.0701742
chr12	49195220	49195388	169	-12399	ADCY6	ENSG00000174233	54.4534	70.9676	16.5142	13.0119	3.34739	0.0549429	chr5	180262451	180263371	921	-19870	MGAT1	ENSG00000131446	84.3609	62.153	-22.2079	-64.4666	-3.0657	0.0586095
chr12	49487166	49487396	231	1205	DHH	ENSG00000139549	47.2241	63.5456	16.3215	9.57062	3.25655	0.0540526	chr6	654430	654718	289	2244	HUS1B	ENSG00000188996	89.7697	69.1981	-20.5716	-12.6955	-3.09285	0.0554127
chr12	49883255	49883750	496	-49189	KCNH3	ENSG00000135519	60.8331	79.293	18.4599	19.3328	3.35604	0.0530016	chr6	761169	761383	215	-68051	EXOC2	ENSG00000112685	74.3101	49.3324	-24.9777	-56.7138	-3.14892	0.0621443
chr12	49900991	49901556	566	-31383	KCNH3	ENSG00000135519	45.9089	68.8865	22.9775	31.1702	4.18543	0.0598206	chr6	1310666	1311362	697	-1312	FOXQ1	ENSG00000164379	70.7882	24.3752	-46.4131	-158.683	-3.02445	0.0790817
chr12	50344444	50344866	423	0	AQP2	ENSG00000167580	48.5678	66.7814	18.2136	60.5107	3.30568	0.0542672	chr6	1314473	1314758	286	1797	FOXQ1	ENSG00000164379	71.7188	32.0575	-39.6613	-28.4222	-3.2594	0.0660972
chr12	50781879	50782149	271	-4016	LARP4	ENSG00000161813	42.0605	60.8269	18.7664	15.2954	3.11037	0.0533287	chr6	1378506	1379381	876	-10687	FOXF2	ENSG00000137273	57.7033	15.0643	-42.639	-390.959	-3.01236	0.0754328
chr12	50784193	50784235	43	-1930	LARP4	ENSG00000161813	49.2926	72.6051	23.3125	11.8249	3.9588	0.0533287	chr6	1607607	1608442	836	-2238	FOXC1	ENSG00000054598	84.323	45.215	-39.108	-111.322	-3.00362	0.130792
chr12	51118022	51119224	1203	-38268	ATF1	ENSG00000123268	45.7181	62.0519	16.3338	32.1416	3.93383	0.0538508	chr6	1636091	1636266	176	25409	FOXC1	ENSG00000054598	65.9119	45.1026	-20.8093	-18.5304	-3.01291	0.0619263
chr12	52311421	52311909	489	2188	ACVRL1	ENSG00000139567	44.3452	65.0435	20.6983	82.3706	4.39562	0.0563656	chr6	1686176	1686480	305	75494	FOXC1	ENSG00000054598	61.4357	41.4567	-19.979	-37.7815	-3.2982	0.0543011
chr12	54052724	54053081	358	16817	ATP5G2	ENSG00000135390	17.3946	35.3688	17.9742	12.6892	3.24422	0.0535405	chr6	1822702	1823031	330	212020	FOXC1	ENSG00000054598	53.0952	31.5119	-21.5833	-12.8088	-3.12086	0.0583586
chr12	54353721	54354222	502	5102	HOXC12	ENSG00000123407	20.1105	38.0155	17.905	45.085	3.51867	0.053081	chr6	2085907	2086040	134	90184	GMDS	ENSG00000112699	85.8555	66.9468	-18.9087	-12.4366	-3.02563	0.0544139
chr12	54429463	54429783	321	2825	HOXC5	ENSG00000172789	27.312	51.3352	24.0232	9.19695	3.0771	0.0628118	chr6	2086651	2087056	406	89168	GMDS	ENSG00000112699	82.3708	60.5788	-21.792	-25.0583	-3.53145	0.0544139
chr12	56370560	56370696	137	2674	RAB5B	ENSG00000111540	70.6278	87.8969	17.2691	9.23822	3.18153	0.0559886	chr6	2111107	2111896	790	64328	GMDS	ENSG00000112699	85.8753	62.9271	-22.9482	-30.0899	-3.12687	0.0566682
chr12	57611620	57611784	165	1041	NXPH4	ENSG00000182379	45.9745	64.0415	18.0671	10.1065	3.63619	0.0531548	chr6	2435194	2435674	481	-189267	GMDS	ENSG00000112699	47.166	30.977	-16.189	-41.3329	-3.0379	0.0695134
chr12	70134983	70135172	190	1802	RAB3IP	ENSG00000127328	62.8243	85.9385	23.1143	23.8828	3.84531	0.0594951	chr6	2688762	2689239	478	-53924	C6orf195	ENSG00000164385	83.8271	63.6211	-20.206	-28.2633	-3.36237	0.0570295
chr12	76869467	76869776	310	10111	OSBPL8	ENSG00000091039	58.9891	86.5026	27.5135	23.6609	4.80771	0.0547408	chr6	2877211	2877999	789	25514	SERPINB9	ENSG00000170542	57.3048	22.7981	-34.5067	-87.0466	-3.71098	0.0655933
chr12	88427688	88428091	404	-1131	C12orf29	ENSG00000133641	65.2308	89.3751	24.1443	23.1947	4.18457	0.0588127	chr6	2901099	2902702	1604	811	SERPINB9	ENSG00000170542	74.5777	45.9667	-28.611	-156.769	-3.08143	0.070477
chr12	95922451	95922601	151	5500	USP44	ENSG00000136014	40.7779	59.1861	18.4081	12.8245	3.23917	0.0567616	chr6	2991947	2992052	106	3066	NQO2	ENSG00000124588	82.6892	63.4262	-19.263	-28.4112	-3.11531	0.0537923
chr12	99138645	99139026	382	96506	APAF1	ENSG00000120868	53.2525	80.4213	27.1688	21.5021	4.80041	0.0698702	chr6	3069964	3070042	79	1305	RIPK1	ENSG00000137275	57.4641	33.5647	-23.8994	-29.1006	-3.83182	0.05434
chr12	102512886	102513171	286	26	NUP37	ENSG00000075188	43.8383	63.2929	19.4545	23.5933	3.82569	0.0595579	chr6	3113558	3113880	323	-4727	BPHL	ENSG00000137274	69.0437	49.0906	-19.9531	-24.5105	-3.00966	0.0559902
chr12	105013496	105014450	955	30869	CHST11	ENSG00000171310	67.2533	82.3429	15.0896	40.4111	3.94641	0.0530391	chr6	3139627	3140245	619	-413	BPHL	ENSG00000137274	62.6211	39.19	-23.4311	-60.3726	-3.11225	0.0673401
chr12	105626402	105627446	1045	0	APPL2	ENSG00000136044	42.992	63.7181	20.7261	50.3366	4.72179	0.0580852	chr6	3281839	3283039	1201	22544	PSMG4	ENSG00000180822	50.575	22.4515	-28.1235	-103.047	-3.2264	0.0586105
chr12	106480366	106481167	802	0	NUAK1	ENSG00000074590	64.4991	88.5369	24.0378	89.7604	3.5801	0.071548	chr6	3340445	3341460	1016	81150	PSMG4	ENSG00000180822	63.2747	40.6292	-22.6456	-80.9714	-3.04394	0.0560825
chr12	106481558	106481834	277	-823	NUAK1	ENSG00000074590	65.0968	90.1931	25.0963	24.9309	3.58653	0.0713704	chr6	3341899	3342022	124	82604	PSMG4	ENSG00000180822	60.6752	43.0792	-17.5959	-15.6666	-3.00006	0.0560825
chr12	106482196	106482292	97	-1461	NUAK1	ENSG00000074590	61.7303	84.231	22.5007	9.57368	3.23979	0.0709352	chr6	3426950	3428139	1190	11512	SLC22A23	ENSG00000137266	59.9494	31.0459	-28.9036	-125.126	-3.09086	0.0592922
chr12	107165747	107166298	552	-2074	RIC8B	ENSG00000111785	30.8888	64.4081	33.5192	41.3355	6.51522	0.0535121	chr6	3473667	3474130	464	-16410	SLC22A23	ENSG00000137266	69.0712	48.2977	-20.7735	-41.1384	-3.05587	0.0605106
chr12	109024472	109024571	100	1282	SELPLG	ENSG00000110876	50.0592	65.0498	14.9907	9.14343	3.07222	0.0530016	chr6	3501053	3501608	556	-43796	SLC22A23	ENSG00000137266	68.1387	52.6853	-15.4534	-55.0296	-3.06923	0.0557873
chr12	109040383	109040512	130	5608	CORO1C	ENSG00000110880	35.4823	50.1066	14.6242	17.129	3.44726	0.0546931	chr6	3722298	3723031	734	16096	PXDC1	ENSG00000168994	72.5397	46.9411	-25.5986	-46.5393	-3.0579	0.0546969
chr12	110044408	110044773	366	31795	MVK	ENSG00000110921	21.6255	44.9341	23.3086	66.641	3.21234	0.0610599	chr6	3743461	3743715	255	-4332	PXDC1	ENSG00000168994	52.6244	25.9883	-26.6361	-32.3478	-3.02406	0.074287
chr12	114291048	114291822	775	112288	RBM19	ENSG00000122965	51.7536	77.4022	25.6486	49.7274	5.37397	0.0551516	chr6	3759345	3760255	911	-7084	PXDC1	ENSG00000168994	65.5742	43.1971	-22.3771	-44.9519	-3.05437	0.0549812
chr12	114842049	114842268	220	-345	TBX5	ENSG00000089225	25.7905	58.3096	32.5191	18.8638	3.21226	0.115395	chr6	4402705	4403431	727	-266873	ECI2	ENSG00000198721	43.5273	24.7881	-18.7393	-51.9215	-3.00177	0.0561674
chr12	114844902	114845868	967	323	TBX5	ENSG00000089225	28.8757	64.9215	36.0458	79.0807	4.47977	0.102012	chr6	4610575	4611055	481	-95337	CDYL	ENSG00000153046	81.6878	63.5149	-18.1728	-46.827	-3.02856	0.0621645
chr12	114921473	114922109	637	-75225	TBX5	ENSG00000089225	30.1571	47.0743	16.9171	25.5762	4.13125	0.0562034	chr6	4733944	4734661	718	27550	CDYL	ENSG00000153046	58.1979	33.8701	-24.3279	-37.8596	-3.4287	0.0578094
chr12	115101828	115105547	3720	15847	TBX3	ENSG00000135111	3.80596	67.6292	63.8233	942.053	7.6468	0.108688	chr6	4806798	4807277	480	-29054	CDYL	ENSG00000153046	71.626	47.529	-24.0969	-38.2595	-3.00884	0.0697363
chr12	115123415	115123757	343	-1445	TBX3	ENSG00000135111	10.0002	49.379	39.3788	53.6034	3.38652	0.0745568	chr6	5315936	5316250	315	54176	FARS2	ENSG00000145982	66.8248	48.0243	-18.8005	-22.1552	-3.06912	0.0549115
chr12	115128419	115129506	1088	-6449	TBX3	ENSG00000135111	18.3296	56.2733	37.9436	61.8378	4.26383	0.0673568	chr6	5752226	5753172	947	254027	NRN1	ENSG00000124785	72.2617	47.117	-25.1447	-62.2266	-3.14224	0.0638239
chr12	115131142	115132889	1748	-9172	TBX3	ENSG00000135111	28.1227	67.9492	39.8265	157.02	8.17959	0.0543385	chr6	5761774	5761892	119	245307	NRN1	ENSG00000124785	57.6808	35.2063	-22.4745	-9.47049	-3.07462	0.0641017
chr12	115171807	115171968	162	-49837	TBX3	ENSG00000135111	62.9517	81.7703	18.8185	16.9076	3.69264	0.053035	chr6	5762332	5763136	805	244063	NRN1	ENSG00000124785	68.4571	41.0926	-27.3645	-56.2723	-3.02054	0.066986
chr12	115188338	115189175	838	-66368	TBX3	ENSG00000135111	40.4956	70.8251	30.3295	93.3262	4.53869	0.0663652	chr6	7543901	7544197	297	2050	DSP	ENSG00000096696	61.6802	41.189	-20.4912	-13.4217	-3.18541	0.0648665
chr12	116191538	116197431	5894	216052	MED13L	ENSG00000123066	7.97027	55.0919	47.1216	350.732	6.47025	0.0836373	chr6	7729219	7729656	438	2188	BMP6	ENSG00000153162	63.9888	41.4097	-22.579	-26.3266	-3.14359	0.0608205
chr12	116416280	116417046	767	-2795	MED13L	ENSG00000123066	60.4884	81.8755	21.3871	58.0397	4.73197	0.0551996	chr6	8436344	8436468	125	-549	SLC35B3	ENSG00000124786	57.9153	39.63	-18.2853	-13.2224	-3.19531	0.0555444
chr12	117132438	117132793	356	25138	C12orf49	ENSG00000111412	45.6194	68.9706	23.3512	42.208	3.31993	0.0584832	chr6	11277808	11278545	738	-44892	NEDD9	ENSG00000111859	70.2866	50.2725	-20.014	-55.6609	-3.10992	0.070244
chr12	117420629	117421224	596	63411	TESC	ENSG00000088992	38.4263	68.1484	29.7221	41.032	3.84734	0.068742	chr6	11539441	11539494	54	929	TMEM170B	ENSG00000205269	76.9493	59.4096	-17.5397	-10.5339	-3.49063	0.0541434
chr12	117470503	117470568	66	14067	TESC	ENSG00000088992	34.4013	62.127	27.7258	18.3393	3.73813	0.0743132	chr6	12052023	12052679	657	36202	HIVEP1	ENSG00000095951	85.3915	61.834	-23.5575	-21.9718	-3.12799	0.0539216
chr12	117593074	117593094	21	11756	FBXO21	ENSG00000135108	60.3894	78.1829	17.7936	9.01577	3.00633	0.0658334	chr6	13614501	13614644	144	-914	NOL7	ENSG00000225921	53.0932	27.4845	-25.6087	-19.6124	-3.41954	0.0608526
chr12	120538445	120538853	409	-1550	RAB35	ENSG00000111737	44.0392	62.0242	17.9851	85.3843	4.0417	0.0543092	chr6	14001521	14002059	539	76096	RNF182	ENSG00000180537	41.9759	26.5163	-15.4596	-39.2403	-3.03774	0.0613688
chr12	123258343	123258441	99	-432	CCDC62	ENSG00000130783	43.7711	64.474	20.7029	15.5019	3.96358	0.0562565	chr6	14285401	14286053	653	167528	CD83	ENSG00000112149	59.5624	39.9581	-19.6043	-42.7074	-3.59151	0.0540746
chr12	123334070	123334513	444	-10198	HIP1R	ENSG00000130787	52.2239	75.7003	23.4764	66.601	4.13222	0.056425	chr6	14286376	14286880	505	168503	CD83	ENSG00000112149	44.3675	26.1559	-18.2116	-24.1905	-3.76732	0.0540746
chr12	123341805	123342454	650	-2257	HIP1R	ENSG00000130787	37.8587	65.9053	28.0466	52.519	5.74016	0.053657	chr6	14477917	14478207	291	360044	CD83	ENSG00000112149	52.3826	35.2581	-17.1245	-18.3713	-3.00775	0.0569657
chr12	124397681	124398408	728	4820	DNAH10	ENSG00000197653	46.8688	64.8164	17.9476	58.3691	3.70302	0.054149	chr6	14516988	14517734	747	399115	CD83	ENSG00000112149	65.9989	39.7501	-26.2488	-67.0488	-3.56376	0.0652709
chr12	124481706	124482766	1061	23863	ZNF664	ENSG00000179195	51.7001	78.2469	26.5469	45.891	4.38478	0.0559786	chr6	14921463	14921725	263	-324801	JARID2	ENSG00000008083	79.4042	61.8714	-17.5328	-38.8668	-3.3156	0.0647136
chr12	124484124	124484288	165	26281	ZNF664	ENSG00000179195	51.1085	80.4024	29.2939	17.1742	4.42985	0.0559786	chr6	15309726	15309899	174	60582	JARID2	ENSG00000008083	69.2708	45.7581	-23.5128	-9.52112	-3.16484	0.0578827
chr12	125237520	125238290	771	63962	SCARB1	ENSG00000073060	61.6198	79.5431	17.9233	65.5716	3.61955	0.0548273	chr6	15690410	15690713	304	-27136	DTNBP1	ENSG00000047579	37.6894	20.9827	-16.7067	-17.5829	-3.31691	0.0537923
chr12	125243371	125243455	85	58797	SCARB1	ENSG00000073060	47.889	64.579	16.69	15.1604	3.05442	0.0530016	chr6	15691966	15692060	95	-28692	DTNBP1	ENSG00000047579	29.9166	15.3678	-14.5488	-12.4448	-3.03787	0.0537923
chr12	125669529	125670011	483	56436	AACS	ENSG00000081760	29.7948	58.4455	28.6507	35.1406	3.81083	0.0665851	chr6	16131037	16131620	584	1634	MYLIP	ENSG00000007944	34.8152	11.5183	-23.2969	-21.6671	-3.16317	0.0540242
chr12	127210174	127210654	481	1103131	TMEM132B	ENSG00000139364	27.8886	62.0952	34.2066	47.2873	3.99853	0.0690926	chr6	16219248	16219414	167	-19396	GMPR	ENSG00000137198	75.3727	55.6538	-19.7188	-9.78771	-3.07866	0.0574897
chr12	128097342	128098016	675	-653931	TMEM132C	ENSG00000181234	50.1322	75.9357	25.8036	38.3741	3.91263	0.0530016	chr6	16243303	16243530	228	4491	GMPR	ENSG00000137198	68.6174	49.3373	-19.2802	-18.2364	-3.00962	0.061908
chr12	131437734	131437877	144	-574	GPR133	ENSG00000111452	22.2935	40.5702	18.2767	9.39471	3.20263	0.0633339	chr6	16346275	16346536	262	107463	GMPR	ENSG00000137198	67.0597	40.9767	-26.083	-26.6187	-3.04671	0.062823
chr12	132838117	132838375	259	-3835	GALNT9	ENSG00000182870	48.3403	65.4437	17.1034	23.8709	3.63203	0.0530291	chr6	17032787	17033779	993	-68709	STMND1	ENSG00000230873	44.9021	29.0125	-15.8896	-56.4478	-3.00028	0.0549391
chr12	133023383	133023501	119	27224	MUC8	ENSG00000269676	52.8461	70.4408	17.5948	12.6698	3.19888	0.0576791	chr6	17418577	17419305	729	24633	CAP2	ENSG00000112186	62.417	41.9572	-20.4598	-34.4446	-3.01532	0.0604318
chr12	133030212	133030358	147	20367	MUC8	ENSG00000269676	32.0387	48.8783	16.8396	24.5291	3.10424	0.0559278	chr6	17469846	17470599	754	75902	CAP2	ENSG00000112186	65.7689	40.2998	-25.4691	-45.7127	-3.12146	0.0539538
chr12	133091216	133091772	557	24058	FBRSL1	ENSG00000112787	63.4376	83.4647	20.0271	32.5145	3.98089	0.0538186	chr6	17471196	17471397	202	77252	CAP2	ENSG00000112186	70.0417	47.3706	-22.6711	-10.8195	-3.23546	0.0539538
chr12	133126807	133127148	342	59649	FBRSL1	ENSG00000112787	43.0359	63.2263	20.1904	71.5135	3.5518	0.0636093	chr6	17657602	17658231	630	48386	NUP153	ENSG00000124789	88.9065	66.2925	-22.6141	-19.3936	-3.08255	0.0592287
chr12	133170404	133170820	417	-24545	P2RX2	ENSG00000187848	30.7015	50.3524	19.6509	45.3719	3.38024	0.0595736	chr6	17792348	17793604	1257	1323	KIF13A	ENSG00000137177	84.4546	62.9737	-21.4809	-65.7585	-3.07248	0.0542974
chr13	20232554	20232953	400	-9577	MPHOSPH8	ENSG00000196199	53.7667	72.411	18.6443	16.4281	3.30463	0.0560621	chr6	17985844	17986430	587	1263	KIF13A	ENSG00000137177	43.1471	17.3877	-25.7594	-36.3313	-3.32461	0.0555583
chr13	20698057	20698194	138	36993	GJA3	ENSG00000121743	46.947	71.6782	24.7312	10.4042	3.49705	0.0684642	chr6	18389642	18389769	128	2060	RNF144B	ENSG00000137393	43.3907	26.004	-17.3867	-10.0094	-3.29382	0.0537923
chr13	20749799	20750336	538	13582	GJB2	ENSG00000165474	34.9231	54.4071	19.484	22.3258	4.21768	0.0557211	chr6	19465672	19466707	1036	-370909	ID4	ENSG00000172201	70.1201	49.623	-20.4971	-43.3898	-3.02294	0.0565971
chr13	20989349	20989414	66	110581	CRYL1	ENSG00000165475	39.9873	60.2961	20.3087	15.0724	3.02001	0.0582818	chr6	19720064	19720283	220	-117333	ID4	ENSG00000172201	71.4326	50.0838	-21.3488	-18.2237	-3.00923	0.0542212
chr13	23499932	23500054	123	-255036	SGCG	ENSG00000102683	51.9227	70.4659	18.5432	18.6713	3.16812	0.0580668	chr6	20211161	20211373	213	1256	MBOAT1	ENSG00000172197	66.7296	39.8472	-26.8824	-15.5499	-3.35779	0.0633882
chr13	24539505	24539785	281	-14158	SPATA13	ENSG00000182957	32.5522	56.7712	24.2189	17.3606	3.59353	0.0552158	chr6	20440010	20440832	823	35975	E2F3	ENSG00000112242	78.3701	58.1181	-20.252	-29.0902	-3.02231	0.0537923
chr13	25085646	25085917	272	1030	PARP4	ENSG00000102699	26.3928	48.0837	21.6908	36.186	4.47166	0.0561264	chr6	20488007	20488318	312	-46369	CDKAL1	ENSG00000145996	89.3398	68.3748	-20.965	-15.9668	-3.12585	0.0541235
chr13	27557216	27557409	194	188623	USP12	ENSG00000152484	21.1079	38.7348	17.6269	15.1291	3.05221	0.0604637	chr6	21603747	21604441	695	9675	SOX4	ENSG00000124766	75.8845	55.0547	-20.8299	-20.3918	-3.06715	0.0538141
chr13	29107456	29107551	96	-38190	FLT1	ENSG00000102755	34.6162	53.5395	18.9233	13.6252	3.46192	0.0580234	chr6	22147383	22148507	1125	149222	PRL	ENSG00000172179	78.2564	46.0592	-32.1972	-53.3939	-3.00893	0.0795099
chr13	30079880	30080350	471	77033	MTUS2	ENSG00000132938	57.3168	78.9662	21.6494	45.6728	3.90326	0.0570192	chr6	22249556	22249940	385	47789	PRL	ENSG00000172179	75.3222	56.1879	-19.1343	-15.166	-3.00655	0.0551034
chr13	30152158	30152915	758	8013	SLC7A1	ENSG00000139514	63.8378	84.679	20.8411	62.9856	4.1304	0.0552158	chr6	22447091	22447324	234	-122353	HDGFL1	ENSG00000112273	41.0179	23.5039	-17.514	-9.26294	-3.07142	0.0572229
chr13	30156320	30156569	250	4359	SLC7A1	ENSG00000139514	52.2501	72.2853	20.0352	33.6224	3.38823	0.0590907	chr6	24882863	24883693	831	-5279	FAM65B	ENSG00000111913	71.3236	56.8914	-14.4322	-36.5615	-3.05607	0.0545248
chr13	31370217	31371618	1402	60571	ALOX5AP	ENSG00000132965	14.7545	49.2295	34.4751	117.642	5.00937	0.076028	chr6	25061773	25062054	282	-19534	FAM65B	ENSG00000111913	67.4621	50.263	-17.1991	-12.3377	-3.01869	0.0583781
chr13	39969516	39969736	221	207571	LHFP	ENSG00000183722	32.8053	48.9928	16.1875	21.4514	3.12927	0.0561169	chr6	26203748	26204036	289	-821	HIST1H4E	ENSG00000198518	63.2289	40.6152	-22.6137	-27.9811	-3.06992	0.0578925
chr13	40743657	40743851	195	367471	AL133318.1	ENSG00000269120	56.1045	79.85	23.7455	12.9509	3.24935	0.0554769	chr6	26323563	26324000	438	-37800	HIST1H4H	ENSG00000158406	66.9031	45.3059	-21.5972	-48.0158	-3.16468	0.0538671
chr13	44118664	44119102	439	64953	ENOX1	ENSG00000120658	36.8874	51.538	14.6507	22.142	3.21296	0.0552158	chr6	27301680	27302167	488	-21730	POM121L2	ENSG00000158553	53.9006	30.8016	-23.099	-51.5244	-3.3456	0.0540202
chr13	44359042	44359325	284	1718	ENOX1	ENSG00000120658	43.0331	62.3202	19.2871	19.9784	3.53983	0.055929	chr6	27781811	27781863	53	743	HIST1H2AJ	ENSG00000182611	68.9392	50.8064	-18.1328	-9.18737	-3.03444	0.0546687
chr13	45014430	45014751	322	-3448	TSC22D1	ENSG00000102804	30.98	51.9568	20.9768	35.5258	3.2677	0.0618988	chr6	27857528	27857750	223	819	HIST1H3J	ENSG00000197153	50.7643	30.5149	-20.2494	-17.2501	-3.19296	0.056565
chr13	45031237	45031458	222	16927	TSC22D1	ENSG00000102804	45.1926	63.1324	17.9397	22.565	3.24699	0.0568314	chr6	28601417	28602009	593	-46304	SCAND3	ENSG00000232040	61.1294	39.6285	-21.5009	-72.4958	-3.10139	0.0572519
chr13	45717552	45717922	371	22901	GTF2F2	ENSG00000188342	52.6786	76.668	23.9894	25.8346	3.26292	0.0645951	chr6	28725179	28725966	788	150799	TRIM27	ENSG00000204713	49.3168	15.7919	-33.5249	-160.879	-3.12459	0.0665123
chr13	48800867	48801007	141	-6286	ITM2B	ENSG00000136156	55.3498	79.0308	23.6809	25.6803	4.30019	0.0565181	chr6	28731492	28732335	844	144430	TRIM27	ENSG00000204713	50.7698	15.6517	-35.1181	-115.134	-3.02158	0.0680404
chr13	48801525	48801840	316	-5453	ITM2B	ENSG00000136156	58.5075	80.0357	21.5282	41.8418	4.08443	0.0588125	chr6	30027796	30027963	168	-1067	ZNRD1	ENSG00000066379	41.9067	21.2177	-20.689	-15.5358	-3.27716	0.0543827
chr13	50134569	50135638	1070	5820	RCBTB1	ENSG00000136144	53.9055	76.1159	22.2104	50.3831	4.32748	0.0552158	chr6	30067746	30067855	110	13011	TRIM31	ENSG00000204616	50.4777	27.2157	-23.262	-16.7042	-3.3169	0.0622084
chr13	51649391	51649751	361	-146751	FAM124A	ENSG00000150510	51.1498	73.2323	22.0826	12.3606	3.21504	0.0573608	chr6	30458099	30458278	180	854	HLA-E	ENSG00000204592	48.7009	27.4755	-21.2254	-40.6197	-3.00671	0.0546918
chr13	51923663	51923819	157	8494	SERPINE3	ENSG00000253309	50.7499	75.2405	24.4905	27.4957	3.95215	0.0556236	chr6	30652977	30653530	554	1462	PPP1R18	ENSG00000146112	57.4865	26.5722	-30.9143	-42.3554	-3.04307	0.0792613
chr13	51924156	51924462	307	8987	SERPINE3	ENSG00000253309	54.4096	76.1266	21.7169	13.7463	3.62575	0.0556236	chr6	30746335	30747006	672	-34003	IER3	ENSG00000137331	42.2765	21.3129	-20.9637	-61.0338	-3.13801	0.059361
chr13	52270621	52271096	476	107137	DHRS12	ENSG00000102796	53.1772	81.3604	28.1832	25.9885	5.12135	0.0605157	chr6	30849709	30850338	630	-51	DDR1	ENSG00000204580	52.9505	30.3439	-22.6066	-60.0901	-3.09862	0.0596875
chr13	52271505	52272303	799	105930	DHRS12	ENSG00000102796	49.3872	80.2952	30.9079	38.3319	5.6057	0.0605157	chr6	30882734	30883203	470	574	VARS2	ENSG00000137411	61.6629	34.5101	-27.1528	-51.4514	-3.15035	0.0546496
chr13	52300355	52300672	318	77561	DHRS12	ENSG00000102796	60.5782	77.9759	17.3977	9.20283	3.08803	0.0552483	chr6	31238788	31238863	76	982	HLA-C	ENSG00000204525	46.1843	29.4601	-16.7242	-15.8776	-3.07323	0.0562026
chr13	52928031	52928160	130	52102	THSD1	ENSG00000136114	31.583	51.4267	19.8436	10.6763	3.60152	0.0554047	chr6	31627511	31627633	123	915	C6orf47	ENSG00000204439	49.2877	27.9761	-21.3116	-12.8849	-3.10214	0.0559044
chr13	52928525	52928819	295	51443	THSD1	ENSG00000136114	44.1504	63.5419	19.3915	34.6676	3.59264	0.0554047	chr6	32015175	32015226	52	-1269	TNXB	ENSG00000168477	56.7119	32.2117	-24.5003	-9.06718	-3.0173	0.076261
chr13	52967621	52967779	159	12483	THSD1	ENSG00000136114	52.7919	73.0355	20.2436	19.1064	3.2047	0.0558444	chr6	32026299	32026891	593	-12393	TNXB	ENSG00000168477	47.9576	27.9233	-20.0344	-48.3511	-3.09317	0.0571849
chr13	53011605	53012257	653	12499	VPS36	ENSG00000136100	43.4838	77.1245	33.6406	62.4199	4.0968	0.0625606	chr6	32049920	32049953	34	27136	TNXB	ENSG00000168477	57.3764	27.0947	-30.2817	-9.03247	-3.00969	0.0877543
chr13	53023015	53023405	391	1351	VPS36	ENSG00000136100	42.4338	73.073	30.6392	36.7125	4.83032	0.0714465	chr6	32118765	32119041	277	687	PRRT1	ENSG00000204314	42.6566	19.1456	-23.511	-16.1434	-3.09554	0.0636303
chr13	53776098	53776107	10	173203	OLFM4	ENSG00000102837	28.8201	46.9938	18.1737	9.03821	3.02034	0.0553489	chr6	32811181	32811253	73	543	PSMB8	ENSG00000204264	57.2989	32.8061	-24.4928	-11.238	-3.46295	0.0545262
chr13	53776116	53776225	110	173221	OLFM4	ENSG00000102837	30.2981	48.8684	18.5703	48.8461	3.068	0.0558613	chr6	32820201	32820254	54	280	TAP1	ENSG00000168394	60.0914	38.6208	-21.4706	-12.8057	-3.0254	0.0547073
chr13	77461960	77462484	525	-1419	KCTD12	ENSG00000178695	45.2766	75.0028	29.7262	22.6626	4.11282	0.0633752	chr6	32822857	32822911	55	918	PSMB9	ENSG00000240065	52.4202	26.7686	-25.6516	-16.7592	-3.28344	0.0646611
chr13	79221223	79222190	968	11123	RNF219	ENSG00000152193	56.5656	88.0902	31.5246	84.6015	5.26519	0.0570903	chr6	33245432	33245664	233	514	B3GALT4	ENSG00000235863	48.7024	24.9144	-23.7881	-60.234	-3.09295	0.0577272
chr13	88327723	88328575	853	2224	SLITRK5	ENSG00000165300	43.6115	71.0636	27.452	99.6385	3.86381	0.0720001	chr6	33739826	33740012	187	4908	LEMD2	ENSG00000161904	45.7626	28.8917	-16.8709	-12.5999	-3.07208	0.0549736
chr13	88329024	88329466	443	3525	SLITRK5	ENSG00000165300	42.8578	68.8994	26.0416	47.4189	3.3091	0.0770573	chr6	34121998	34122132	135	1266	GRM4	ENSG00000124493	58.7505	38.9432	-19.8074	-27.4788	-3.17445	0.0568602
chr13	91826938	91827290	353	-223638	GPC5	ENSG00000179399	23.7605	44.3221	20.5616	46.9251	3.28621	0.0577679	chr6	34217439	34217677	239	-191	C6orf1	ENSG00000186577	70.8362	48.9961	-21.8401	-19.8892	-3.47405	0.0539827
chr13	98764172	98764266	95	-30549	FARP1	ENSG00000152767	50.9195	70.6679	19.7484	9.01536	3.00749	0.0587533	chr6	35700340	35700725	386	-3979	FKBP5	ENSG00000096060	53.7536	29.457	-24.2966	-39.7727	-3.00472	0.0542462
chr13	98824072	98824779	708	4739	RNF113B	ENSG00000139797	37.5539	61.389	23.8352	65.6987	3.66949	0.0693824	chr6	36756502	36756830	329	-31315	CPNE5	ENSG00000124772	55.8671	42.2217	-13.6453	-18.6282	-3.00813	0.056455
chr13	99149372	99150086	715	21434	STK24	ENSG00000102572	36.8633	55.6554	18.7921	41.0654	4.33772	0.0575429	chr6	36809313	36809698	386	-1534	CPNE5	ENSG00000124772	59.3693	40.5347	-18.8346	-13.4478	-3.11034	0.0556586
chr13	101200017	101200409	393	-14019	GGACT	ENSG00000134864	49.0972	76.0074	26.9102	42.3722	4.16653	0.061109	chr6	36895131	36895527	397	-26681	PI16	ENSG00000164530	63.4016	37.1049	-26.2967	-16.2685	-3.02407	0.0637839
chr13	107024278	107024485	208	162976	EFNB2	ENSG00000125266	44.5268	60.5349	16.0081	12.0808	3.03428	0.0554918	chr6	37019925	37020047	123	7317	COX6A1P2	ENSG00000226976	73.3534	56.8121	-16.5413	-13.289	-3.13202	0.0547479
chr13	107364471	107365439	969	-143958	ARGLU1	ENSG00000134884	26.8731	50.6609	23.7878	68.4472	3.82097	0.0555666	chr6	39693621	39693690	70	-439	KIF6	ENSG00000164627	69.9265	53.443	-16.4835	-22.2233	-3.14181	0.0681463
chr13	107861591	107862435	845	-641078	ARGLU1	ENSG00000134884	41.6903	59.2813	17.591	64.62	3.85785	0.0562366	chr6	39762213	39763214	1002	1418	DAAM2	ENSG00000146122	53.2634	30.8128	-22.4506	-37.3335	-3.00886	0.0620989
chr13	109778193	109778916	724	239675	MYO16	ENSG00000041515	57.5993	77.1213	19.522	35.927	3.9951	0.0552317	chr6	41418736	41419937	1202	-94226	FOXP4	ENSG00000137166	57.7581	34.2329	-23.5252	-173.838	-3.2262	0.0539886
chr13	109926314	109927654	1341	387796	MYO16	ENSG00000041515	33.2497	57.681	24.4313	53.3381	4.28493	0.0584996	chr6	41470990	41471123	134	-43040	FOXP4	ENSG00000137166	34.5919	15.4603	-19.1316	-33.7601	-3.01908	0.0642713
chr13	110048721	110049321	601	389593	IRS2	ENSG00000185950	57.5435	74.3875	16.844	59.003	3.31577	0.0565305	chr6	41515848	41516280	433	1461	FOXP4	ENSG00000137166	65.5511	34.8033	-30.7478	-173.75	-3.11864	0.0569858
chr13	110350287	110350537	251	88377	IRS2	ENSG00000185950	59.0348	74.7418	15.707	27.5358	3.06643	0.058556	chr6	41666010	41666338	329	-6795	TFEB	ENSG00000112561	69.3479	55.0245	-14.3234	-28.4314	-3.01907	0.055347
chr13	110397349	110398091	743	40823	IRS2	ENSG00000185950	41.9576	84.9411	42.9835	143.744	5.14478	0.0976834	chr6	42068077	42068723	647	41458	C6orf132	ENSG00000188112	59.495	44.091	-15.404	-41.6347	-3.00085	0.0538517
chr13	110758779	110759339	561	-198819	COL4A2	ENSG00000134871	50.8989	72.0924	21.1935	45.6162	3.37341	0.0599745	chr6	42227326	42227627	302	-41722	MRPS10	ENSG00000048544	78.2713	43.8398	-34.4315	-55.3687	-3.00538	0.0954432
chr13	110994378	110994451	74	34763	COL4A2	ENSG00000134871	12.0468	29.3502	17.3034	11.0839	3.96997	0.0552158	chr6	42867719	42868374	656	-9164	C6orf226	ENSG00000221821	46.2659	24.992	-21.2739	-57.0221	-3.02449	0.0663917
chr13	111032343	111032980	638	72728	COL4A2	ENSG00000134871	51.4611	70.077	18.6159	28.6048	4.32492	0.0620207	chr6	43196512	43196620	109	570	DNPH1	ENSG00000112667	71.2276	53.9003	-17.3274	-17.5508	-3.09879	0.0541354
chr13	111194308	111194507	200	19572	RAB20	ENSG00000139832	34.8959	52.5656	17.6697	12.178	3.08436	0.0598847	chr6	43713971	43714554	584	-23395	VEGFA	ENSG00000112715	54.9651	37.8804	-17.0847	-30.8153	-3.00712	0.0569394
chr13	113185567	113186227	661	56211	TUBGCP3	ENSG00000126216	52.2594	73.9693	21.7099	52.476	3.4108	0.0606279	chr6	44118873	44119212	340	-7335	CAPN11	ENSG00000137225	73.3419	53.2119	-20.13	-9.99173	-3.01299	0.0537923
chr13	113377159	113377517	359	32515	ATP11A	ENSG00000068650	47.7411	68.2995	20.5584	31.9648	3.33498	0.0595229	chr6	44186525	44186741	217	-500	SLC29A1	ENSG00000112759	55.327	36.3576	-18.9694	-47.5248	-3.00977	0.0595533
chr13	113414153	113414480	328	-25005	ATP11A	ENSG00000068650	53.8922	73.7634	19.8712	35.7123	3.36941	0.0577768	chr6	44187674	44187846	173	280	SLC29A1	ENSG00000112759	59.7095	36.8056	-22.9039	-15.9814	-3.45138	0.0647173
chr13	113434956	113435294	339	-4191	ATP11A	ENSG00000068650	70.824	88.6477	17.8237	29.7907	3.54479	0.058132	chr6	44669350	44669990	641	253256	SUPT3H	ENSG00000196284	71.5779	57.4609	-14.117	-50.3514	-3.01074	0.0621127
chr13	113655251	113655428	178	-155	MCF2L	ENSG00000126217	26.5365	43.375	16.8386	19.0732	3.29165	0.0552444	chr6	45440888	45441642	755	50665	RUNX2	ENSG00000124813	77.1897	58.2866	-18.9031	-35.3074	-3.04347	0.0554334
chr13	114005775	114006299	525	3451	GRTP1	ENSG00000139835	28.3623	68.0685	39.7062	102.23	6.00361	0.0671438	chr6	45631855	45632130	276	241632	RUNX2	ENSG00000124813	38.6501	21.0573	-17.5928	-21.8842	-3.0247	0.0538402
chr13	114068397	114068471	75	34985	ADPRHL1	ENSG00000153531	67.787	86.8221	19.0352	15.6829	3.15471	0.0571438	chr6	52408445	52408553	109	33159	TRAM2	ENSG00000065308	67.9252	39.3949	-28.5304	-14.2106	-3.34486	0.0715957
chr13	114091766	114092231	466	11225	ADPRHL1	ENSG00000153531	56.5182	75.8334	19.3152	60.5724	3.94111	0.0601669	chr6	52408863	52409810	948	31902	TRAM2	ENSG00000065308	67.9077	33.5987	-34.3089	-65.868	-3.30966	0.0706695
chr13	114516477	114517176	700	19537	GAS6	ENSG00000183087	42.0127	78.1023	36.0896	140.718	4.86156	0.0800363	chr6	53407536	53407785	250	1620	GCLC	ENSG00000001084	88.8282	59.125	-29.7032	-32.0073	-3.99178	0.0571236
chr13	114632308	114632497	190	-65261	GAS6	ENSG00000183087	46.9562	65.909	18.9527	26.5766	3.43009	0.0552809	chr6	57087725	57087947	223	-646	RAB23	ENSG00000112210	61.921	39.6517	-22.2693	-26.2904	-3.13122	0.0569269
chr13	114866595	114866846	252	-23156	RASA3	ENSG00000185989	21.4617	35.4678	14.0062	18.6765	3.15276	0.0592096	chr6	64281380	64281521	142	-395	PTP4A1	ENSG00000112245	52.458	30.93	-21.528	-18.9484	-3.67842	0.0589941
chr13	114890515	114890612	98	7414	RASA3	ENSG00000185989	67.0116	81.6584	14.6468	12.4544	3.16421	0.056765	chr6	69342992	69343459	468	-1799	BAI3	ENSG00000135298	53.4492	31.7166	-21.7326	-17.0336	-3.0118	0.0644113
chr13	115069690	115070456	767	-9531	CHAMP1	ENSG00000198824	71.0016	91.6712	20.6695	51.1177	4.29659	0.0583995	chr6	70507574	70507628	55	-570	LMBRD1	ENSG00000168216	88.4152	70.8873	-17.5279	-9.38532	-3.03506	0.0603775
chr14	20783816	20784031	216	-9662	TTC5	ENSG00000136319	56.5742	76.0987	19.5245	10.7182	3.78497	0.0552895	chr6	71122143	71122402	260	-608	FAM135A	ENSG00000082269	59.2416	40.4326	-18.809	-10.4678	-3.17155	0.0583679
chr14	20784407	20784441	35	-10253	TTC5	ENSG00000136319	58.6996	76.0904	17.3908	12.6829	3.2455	0.0552895	chr6	71378695	71378883	189	1073	SMAP1	ENSG00000112305	49.6433	21.7819	-27.8614	-14.6815	-4.08886	0.0539032
chr14	23292912	23293064	153	-291	SLC7A7	ENSG00000155465	46.999	67.8589	20.8599	32.4349	3.31292	0.0671766	chr6	71667251	71667651	401	-509	B3GAT2	ENSG00000112309	62.5703	44.1579	-18.4124	-52.2009	-3.0197	0.0548049
chr14	24045501	24045901	401	2092	JPH4	ENSG00000092051	28.0089	53.4152	25.4063	106.901	3.40253	0.0741357	chr6	74008786	74009101	316	10836	KHDC1	ENSG00000135314	43.5654	23.5173	-20.0481	-70.7079	-3.03048	0.0556749
chr14	24564689	24564873	185	-349	NRL	ENSG00000129535	17.8553	37.5581	19.7028	12.6783	3.268	0.0560882	chr6	74063982	74064370	389	0	DPPA5	ENSG00000203909	80.1516	62.2266	-17.925	-82.2657	-3.06777	0.0570259
chr14	24694064	24694637	574	6920	NEDD8-MDP1	ENSG00000255526	57.3379	78.3099	20.9719	37.3121	4.34118	0.0537671	chr6	75535594	75536637	1044	292136	COL12A1	ENSG00000111799	65.317	53.6331	-11.6839	-84.1923	-3.05762	0.0625008
chr14	30741856	30742708	853	-80751	PRKD1	ENSG00000184304	31.579	49.0106	17.4316	45.3658	3.36971	0.0517762	chr6	76310654	76310714	61	-510	SENP6	ENSG00000112701	58.2704	40.6351	-17.6353	-13.132	-3.2107	0.055538
chr14	32673663	32673812	150	-124666	AKAP6	ENSG00000151320	13.3766	34.0938	20.7172	9.53429	3.27028	0.056032	chr6	79619177	79619487	311	11267	IRAK1BP1	ENSG00000146243	87.2396	67.5866	-19.653	-10.2391	-3.09555	0.0540207
chr14	33400427	33401891	1465	-2247	NPAS3	ENSG00000151322	57.0011	84.4263	27.4252	118.981	5.29306	0.0525327	chr6	80234769	80235107	339	12017	LCA5	ENSG00000135338	73.8232	59.3229	-14.5004	-13.568	-3.25711	0.0537923
chr14	35364606	35365138	533	-19752	BAZ1A	ENSG00000198604	55.4547	76.5067	21.0519	28.882	4.56118	0.0557608	chr6	80340070	80340389	320	-610	SH3BGRL2	ENSG00000198478	66.1307	46.6476	-19.4832	-24.6344	-3.33691	0.0562701
chr14	36291669	36291890	222	-3633	BRMS1L	ENSG00000100916	33.9725	51.3549	17.3824	12.2046	3.09636	0.0547815	chr6	87832358	87832555	198	-27533	CGA	ENSG00000135346	51.7908	29.5308	-22.26	-95.1073	-3.00631	0.0695906
chr14	50054412	50054520	109	-1317	RPS29	ENSG00000213741	42.6192	62.8486	20.2294	11.1571	3.99326	0.0517762	chr6	88877594	88877633	40	-1515	CNR1	ENSG00000118432	52.0956	38.28	-13.8156	-12.1886	-3.03976	0.0554227
chr14	50060373	50060437	65	-4977	LRR1	ENSG00000165501	41.3923	60.4489	19.0565	9.43743	3.31803	0.0558288	chr6	89792951	89793300	350	1395	PNRC1	ENSG00000146278	59.4012	38.5785	-20.8227	-15.5453	-3.0033	0.0563572
chr14	50060800	50061218	419	-4196	LRR1	ENSG00000165501	28.259	53.1628	24.9038	16.8001	4.36363	0.0558288	chr6	89927233	89927868	636	0	GABRR1	ENSG00000146276	60.5338	42.6111	-17.9227	-40.8708	-3.00367	0.0590949
chr14	51000058	51000212	155	313	ATL1	ENSG00000198513	12.1131	36.2829	24.1698	20.8709	6.10804	0.0542875	chr6	90063039	90063103	65	-471	UBE2J1	ENSG00000198833	61.3506	41.0819	-20.2687	-15.3637	-3.01614	0.0588493
chr14	51000566	51001194	629	821	ATL1	ENSG00000198513	52.1957	73.7948	21.5991	32.8478	6.59186	0.0542875	chr6	90274539	90274831	293	-1817	ANKRD6	ENSG00000135299	54.1553	38.0676	-16.0877	-18.759	-3.10213	0.0540434
chr14	52011102	52012383	1282	55246	FRMD6	ENSG00000139926	37.2108	61.9263	24.7156	50.4724	4.36223	0.0548188	chr6	90841902	90841977	76	164483	BACH2	ENSG00000112182	68.0218	51.3055	-16.7163	-12.4031	-3.0669	0.0538736
chr14	53419337	53419738	402	-183	FERMT2	ENSG00000073712	33.8324	54.2438	20.4114	26.566	4.35897	0.054257	chr6	91385435	91386001	567	-88670	MAP3K7	ENSG00000135341	61.9172	41.8433	-20.0739	-25.1773	-3.3706	0.0572026
chr14	53509446	53510290	845	-90292	FERMT2	ENSG00000073712	36.7501	52.863	16.1129	37.2795	3.49488	0.0517762	chr6	99396215	99396230	16	-365	FBXL4	ENSG00000112234	80.2914	61.4018	-18.8896	-9.68486	-3.19413	0.062675
chr14	53510603	53510891	289	-91449	FERMT2	ENSG00000073712	38.6731	53.6951	15.022	9.48563	3.28405	0.0517762	chr6	105849668	105849983	316	975	PREP	ENSG00000085377	47.2575	29.1351	-18.1224	-28.0575	-3.32866	0.0538428
chr14	55233896	55234099	204	12344	SAMD4A	ENSG00000020577	70.8338	86.9444	16.1106	31.5021	3.18027	0.0517762	chr6	106535425	106535706	282	0	PRDM1	ENSG00000057657	45.42	15.2186	-30.2014	-25.6904	-3.01607	0.0786661
chr14	55353368	55353741	374	15783	GCH1	ENSG00000131979	40.1057	58.734	18.6283	12.6362	3.31494	0.0544627	chr6	106603595	106604194	600	56779	PRDM1	ENSG00000057657	74.0605	51.9367	-22.1238	-44.2756	-3.25906	0.0537923
chr14	55354228	55354253	26	15271	GCH1	ENSG00000131979	46.2311	65.013	18.7819	9.54158	3.19849	0.0544627	chr6	106604605	106604914	310	57789	PRDM1	ENSG00000057657	76.1711	53.9317	-22.2394	-26.3557	-3.56517	0.0537923
chr14	55367172	55367474	303	2050	GCH1	ENSG00000131979	41.8278	69.1064	27.2786	28.1618	4.85181	0.0657568	chr6	106809415	106809680	266	-35748	ATG5	ENSG00000057663	71.0903	47.4614	-23.629	-15.9936	-3.15931	0.0584537
chr14	55593647	55594065	419	-1696	LGALS3	ENSG00000131981	22.8127	45.1719	22.3592	19.0905	3.50109	0.0692289	chr6	108011173	108011866	694	41732	SCML4	ENSG00000146285	42.8439	15.1548	-27.6891	-54.3554	-3.03337	0.0656539
chr14	56825795	56826095	301	-128976	TMEM260	ENSG00000070269	55.2045	70.3019	15.0974	16.1308	3.42612	0.0518844	chr6	108013264	108013317	54	40281	SCML4	ENSG00000146285	35.4061	13.2637	-22.1424	-9.11329	-3.03666	0.0656539
chr14	56826456	56826551	96	-128520	TMEM260	ENSG00000070269	52.4063	69.1549	16.7485	10.6593	3.56649	0.0518844	chr6	108019066	108019452	387	34146	SCML4	ENSG00000146285	61.6932	41.8867	-19.8065	-25.3192	-3.06451	0.0578716
chr14	58668035	58668269	235	1178	ACTR10	ENSG00000131966	26.4197	47.0053	20.5856	14.2236	3.91356	0.053766	chr6	108273683	108274261	579	4282	SEC63	ENSG00000025796	72.2128	49.3448	-22.868	-43.0306	-3.10001	0.0592756
chr14	59828042	59828156	115	97868	DAAM1	ENSG00000100592	55.0446	73.6715	18.6269	15.086	3.01832	0.0532093	chr6	109102715	109102912	198	-66706	ARMC2	ENSG00000118690	50.4744	33.2919	-17.1825	-15.5423	-3.03548	0.0545045
chr14	61131358	61132418	1061	-6380	SIX1	ENSG00000126778	42.7967	60.5947	17.798	28.7756	3.38963	0.0543324	chr6	109274114	109274603	490	55587	SESN1	ENSG00000080546	39.295	22.0339	-17.2611	-85.4883	-3.20541	0.0562188
chr14	62045011	62045292	282	7696	RP11-47I22.3	ENSG00000232774	63.8379	83.315	19.4772	12.8161	3.27382	0.0564122	chr6	109331339	109331442	104	-580	SESN1	ENSG00000080546	43.0593	21.0776	-21.9817	-16.5077	-3.43518	0.0605768
chr14	62083069	62083652	584	-30485	RP11-47I22.3	ENSG00000232774	57.9222	74.1314	16.2092	19.4106	3.34901	0.0542415	chr6	110677726	110678678	953	796	METTL24	ENSG00000053328	68.8624	38.3216	-30.5408	-150.183	-3.06273	0.0653056
chr14	62105510	62105606	97	-8531	RP11-47I22.3	ENSG00000232774	32.9303	57.8296	24.8993	9.14031	3.07229	0.0666272	chr6	110680809	110681031	223	-1333	METTL24	ENSG00000053328	82.3858	63.6188	-18.767	-15.9213	-3.00191	0.0643121
chr14	62186568	62187907	1340	22227	HIF1A	ENSG00000100644	53.4767	76.5106	23.0339	83.4011	4.11947	0.0549479	chr6	111874432	111874499	68	14063	TRAF3IP2	ENSG00000056972	66.859	48.5666	-18.2925	-12.1413	-3.01768	0.0593438
chr14	65934634	65935092	459	-19943	FUT8	ENSG00000033170	75.0869	90.2063	15.1194	39.3116	3.49423	0.0517806	chr6	111894647	111894710	64	-6083	TRAF3IP2	ENSG00000056972	77.4942	53.818	-23.6762	-9.20922	-3.01657	0.065464
chr14	68775471	68776192	722	-102034	RAD51B	ENSG00000182185	35.2113	53.0564	17.8451	23.5481	4.10343	0.0522574	chr6	111963929	111964139	211	-36447	TRAF3IP2	ENSG00000056972	64.8866	47.0018	-17.8848	-9.46254	-3.10573	0.0538496
chr14	69518206	69518851	646	-72048	ACTN1	ENSG00000072110	27.9532	46.968	19.0147	13.7187	3.54434	0.0541084	chr6	112004368	112004580	213	36684	FYN	ENSG00000010810	69.6289	50.5216	-19.1073	-17.005	-3.08971	0.0543446
chr14	71372035	71372392	358	-1729	PCNX	ENSG00000100731	37.0642	60.112	23.0478	33.8653	3.81417	0.0584376	chr6	112081102	112081824	723	0	FYN	ENSG00000010810	69.6877	50.2051	-19.4825	-50.837	-3.05731	0.0563745
chr14	71632302	71632791	490	50670	AC004817.1	ENSG00000267901	38.5768	53.9965	15.4197	41.1762	3.95073	0.0558044	chr6	112192638	112193099	462	1140	FYN	ENSG00000010810	45.1401	25.7031	-19.4371	-23.7079	-3.06689	0.0573042
chr14	73756005	73756713	709	9369	NUMB	ENSG00000133961	52.285	69.9217	17.6367	20.4865	3.56056	0.0522928	chr6	112362742	112363287	546	-11987	WISP3	ENSG00000112761	78.6966	56.9132	-21.7834	-12.7454	-3.05746	0.0634175
chr14	74238686	74238866	181	-11684	ELMSAN1	ENSG00000156030	44.7738	60.2048	15.431	23.9206	3.58147	0.0570435	chr6	112572766	112573128	363	2558	LAMA4	ENSG00000112769	50.0023	16.2763	-33.726	-28.9067	-4.63789	0.0569757
chr14	75238253	75238344	92	8183	YLPM1	ENSG00000119596	59.5943	85.2019	25.6075	23.4527	4.74075	0.0555664	chr6	117869791	117869857	67	53669	GOPC	ENSG00000047932	41.204	20.5772	-20.6268	-10.161	-3.21181	0.0573809
chr14	75417462	75420392	2931	1552	PGF	ENSG00000119630	43.6938	72.4199	28.7261	196.699	4.33766	0.0598488	chr6	119213333	119213628	296	-1755	ASF1A	ENSG00000111875	81.2707	51.8141	-29.4566	-20.7155	-3.10302	0.0560698
chr14	75514419	75515217	799	-890	MLH3	ENSG00000119684	44.6775	69.7623	25.0849	22.6164	3.55292	0.05461	chr6	122791305	122791395	91	1571	SERINC1	ENSG00000111897	64.4206	47.085	-17.3356	-9.09597	-3.0081	0.0542769
chr14	75529658	75529887	230	822	ACYP1	ENSG00000119640	27.6727	48.9494	21.2767	10.9472	4.09671	0.0539336	chr6	125621735	125621902	168	1180	HDDC2	ENSG00000111906	72.3621	55.8492	-16.5129	-16.6657	-3.0985	0.054389
chr14	76219617	76220263	647	7785	TTLL5	ENSG00000119685	56.9743	80.6207	23.6465	24.386	3.57012	0.0517762	chr6	126190207	126191267	1061	-12304	NCOA7	ENSG00000111912	66.679	43.4278	-23.2511	-43.1116	-3.00248	0.0574636
chr14	77426076	77426272	197	68761	IRF2BPL	ENSG00000119669	72.0452	85.4221	13.3768	27.5787	3.15139	0.053971	chr6	127590021	127590699	679	1987	RNF146	ENSG00000118518	54.3464	34.4813	-19.8651	-34.108	-3.04114	0.060219
chr14	77517416	77518057	642	-22381	IRF2BPL	ENSG00000119669	39.5724	58.956	19.3835	54.5328	3.3116	0.0569453	chr6	127835596	127835990	395	1768	SOGA3	ENSG00000214338	33.2045	20.1182	-13.0863	-54.224	-3.02808	0.0578963
chr14	77525890	77525941	52	-30855	IRF2BPL	ENSG00000119669	52.6387	70.0033	17.3645	12.3783	3.10356	0.0544499	chr6	130953382	130954200	819	-194345	SMLR1	ENSG00000256162	65.3758	45.6998	-19.676	-49.5177	-3.0097	0.0567584
chr14	77753056	77753446	391	-2860	POMT2	ENSG00000009830	66.3095	83.4896	17.18	21.7113	3.13142	0.054147	chr6	131100089	131100549	461	-47996	SMLR1	ENSG00000256162	61.9368	43.9486	-17.9881	-26.472	-3.05539	0.0537923
chr14	89764634	89765073	440	102935	FOXN3	ENSG00000053254	58.0691	77.6594	19.5903	17.5756	3.80625	0.0525529	chr6	131100888	131101188	301	-47357	SMLR1	ENSG00000256162	63.8246	45.8885	-17.9361	-16.4362	-3.16796	0.0537923
chr14	89894360	89895046	687	-10903	FOXN3	ENSG00000053254	32.7596	55.2285	22.4689	42.9268	3.97065	0.0607339	chr6	131289586	131290585	1000	1037	EPB41L2	ENSG00000079819	61.2135	33.6654	-27.5481	-41.523	-3.10689	0.0650869
chr14	89940269	89940405	137	19989	FOXN3	ENSG00000053254	18.6477	35.809	17.1613	9.09397	3.06255	0.058661	chr6	131291173	131291516	344	106	EPB41L2	ENSG00000079819	59.7114	33.3608	-26.3506	-26.5805	-3.20933	0.0650869
chr14	89940752	89940947	196	19447	FOXN3	ENSG00000053254	24.7981	42.1434	17.3453	9.10546	3.06401	0.0588622	chr6	131323327	131323472	146	-1419	EPB41L2	ENSG00000079819	69.2068	41.2045	-28.0023	-12.1293	-3.02311	0.0688264
chr14	91012143	91012773	631	64346	TTC7B	ENSG00000165914	49.5013	66.0959	16.5945	25.2508	3.28749	0.0535212	chr6	131358831	131359192	362	-21848	EPB41L2	ENSG00000079819	75.4034	49.4559	-25.9475	-16.7722	-3.23199	0.0539918
chr14	91044391	91044532	142	32587	TTC7B	ENSG00000165914	49.2799	71.2627	21.9828	34.6827	3.22193	0.0631985	chr6	131359952	131360745	794	-22969	EPB41L2	ENSG00000079819	74.623	46.5147	-28.1083	-34.0892	-3.68125	0.0539918
chr14	91070478	91070870	393	6249	TTC7B	ENSG00000165914	68.5162	85.956	17.4398	25.473	3.2916	0.0529448	chr6	131361208	131361730	523	21985	EPB41L2	ENSG00000079819	75.5653	49.7817	-25.7836	-37.141	-3.18884	0.0541216
chr14	91164954	91165145	192	-20764	TTC7B	ENSG00000165914	36.7515	52.1237	15.3722	21.4961	3.08955	0.052605	chr6	131381280	131381296	17	2419	EPB41L2	ENSG00000079819	68.4256	37.6382	-30.7874	-13.8786	-4.58913	0.0611035
chr14	91205639	91205921	283	46659	TTC7B	ENSG00000165914	54.6971	81.8425	27.1454	22.8684	4.88766	0.0541865	chr6	131381606	131381835	230	1880	EPB41L2	ENSG00000079819	56.6586	20.2607	-36.3979	-16.5758	-5.50057	0.0611035
chr14	91206259	91206970	712	45610	TTC7B	ENSG00000165914	55.6643	82.4339	26.7696	68.0257	5.21293	0.0569401	chr6	131382154	131382447	294	1268	EPB41L2	ENSG00000079819	45.7087	15.8762	-29.8325	-39.8671	-3.12429	0.0611035
chr14	91769696	91769781	86	-17683	CCDC88C	ENSG00000015133	40.9693	63.2039	22.2347	12.3504	3.14381	0.0615375	chr6	131972530	131972654	125	14004	ENPP3	ENSG00000154269	67.1059	49.41	-17.6958	-9.90972	-3.15325	0.0550938
chr14	92909017	92909864	848	3308	SLC24A4	ENSG00000140090	45.336	67.5669	22.231	95.9247	4.07622	0.05326	chr6	131973407	131975500	2094	14881	ENPP3	ENSG00000154269	69.1184	42.5105	-26.6079	-104.333	-3.05749	0.0550938
chr14	93438997	93439261	265	49475	CHGA	ENSG00000100604	45.7495	67.2635	21.514	35.6001	3.31028	0.0625306	chr6	133561386	133561765	380	0	EYA4	ENSG00000112319	67.2277	38.7405	-28.4872	-72.1351	-3.04156	0.0576415
chr14	93506293	93506743	451	25959	ITPK1	ENSG00000100605	51.0569	80.3223	29.2653	31.4678	3.66487	0.0626274	chr6	134669170	134670230	1061	-29919	SGK1	ENSG00000118515	76.4453	52.7859	-23.6594	-92.5201	-3.06372	0.0550979
chr14	93512470	93512952	483	19750	ITPK1	ENSG00000100605	53.726	79.3156	25.5896	36.1919	3.9027	0.0546906	chr6	135578572	135578906	335	71415	MYB	ENSG00000118513	58.1908	40.3645	-17.8263	-9.54325	-3.1248	0.0617263
chr14	94253920	94254351	432	0	PRIMA1	ENSG00000175785	40.8695	67.542	26.6725	155.832	4.85095	0.0547273	chr6	135709029	135709452	424	23193	AHI1	ENSG00000135541	73.3516	54.9505	-18.4011	-13.2601	-3.05912	0.0559783
chr14	95775106	95775432	327	-995	CLMN	ENSG00000165959	43.5695	65.7908	22.2212	30.7373	3.0899	0.0676592	chr6	135817535	135817601	67	-756	AHI1	ENSG00000135541	71.8218	51.0986	-20.7231	-9.55776	-3.12689	0.059331
chr14	95957473	95958194	722	-15299	SYNE3	ENSG00000176438	60.8172	79.0727	18.2555	34.8472	3.23357	0.0526878	chr6	136848240	136848313	74	-495	MAP7	ENSG00000135525	40.8027	23.9077	-16.895	-9.62951	-3.12096	0.0617528
chr14	96775605	96775915	311	-32544	DKFZP434O1614	ENSG00000258729	48.0795	66.854	18.7745	28.406	3.59383	0.0579017	chr6	136848648	136848761	114	-903	MAP7	ENSG00000135525	50.3459	26.6196	-23.7263	-12.9222	-4.19473	0.0617254
chr14	96776316	96776470	155	-33255	DKFZP434O1614	ENSG00000258729	50.689	67.1103	16.4213	9.45224	3.27064	0.0579017	chr6	136849068	136849445	378	-1323	MAP7	ENSG00000135525	66.5398	40.2243	-26.3155	-37.7655	-4.53154	0.0616141
chr14	100124481	100125613	1133	13000	HHIPL1	ENSG00000182218	37.979	72.2009	34.2218	166.774	7.24999	0.0551693	chr6	138200604	138200679	76	11884	TNFAIP3	ENSG00000118503	54.0129	30.1208	-23.8921	-12.1433	-3.03054	0.0589758
chr14	100204110	100204578	469	23	EML1	ENSG00000066629	21.1042	44.2168	23.1126	108.266	4.92557	0.0545331	chr6	138891802	138892142	341	1534	NHSL1	ENSG00000135540	49.4923	32.7054	-16.7869	-21.8527	-3.31697	0.0597322
chr14	100598501	100598522	22	3576	EVL	ENSG00000196405	36.2151	58.8959	22.6808	12.0254	3.00806	0.0718633	chr6	139003597	139004837	1241	8870	NHSL1	ENSG00000135540	74.9195	46.9616	-27.9579	-143.91	-3.30822	0.0675722
chr14	100648444	100648585	142	-21943	DEGS2	ENSG00000168350	59.337	86.9487	27.6117	15.4118	5.21599	0.0517762	chr6	139040761	139040798	38	-27052	NHSL1	ENSG00000135540	73.7558	60.2736	-13.4822	-12.3182	-3.05663	0.0558297
chr14	101539317	101540145	829	180051	AL117190.3	ENSG00000269375	35.6449	60.8158	25.1709	149.385	5.01948	0.0657206	chr6	139307224	139307476	253	1300	REPS1	ENSG00000135597	83.6005	41.0762	-42.5243	-35.521	-5.58005	0.0567952
chr14	101962562	101962803	242	-64884	DIO3	ENSG00000197406	21.5776	49.0383	27.4607	21.5478	3.12499	0.0724481	chr6	139454751	139455191	441	-1057	HECA	ENSG00000112406	55.6068	35.2581	-20.3487	-17.7674	-3.02979	0.0538716
chr14	102638034	102638450	417	14437	WDR20	ENSG00000140153	28.4942	49.197	20.7028	18.2679	3.83104	0.0548865	chr6	139692305	139692433	129	2916	CITED2	ENSG00000164442	74.7477	43.7558	-30.9919	-14.0445	-4.65255	0.0614919
chr14	102678480	102678802	323	17196	WDR20	ENSG00000140153	67.8526	82.8157	14.9631	13.0262	3.36814	0.0517965	chr6	139724092	139725109	1018	-28334	CITED2	ENSG00000164442	84.0265	59.5686	-24.458	-63.4679	-3.10569	0.0538033
chr14	102953298	102953782	485	21371	ANKRD9	ENSG00000156381	49.7287	68.807	19.0783	47.7289	4.00588	0.0524419	chr6	139854940	139855412	473	-159182	CITED2	ENSG00000164442	78.1843	46.7854	-31.3989	-41.3721	-3.20503	0.0682463
chr14	103416190	103416505	316	-4521	CDC42BPB	ENSG00000198752	35.8651	57.6588	21.7938	53.0121	3.89754	0.0638545	chr6	139866660	139867499	840	-170902	CITED2	ENSG00000164442	50.1609	27.1853	-22.9756	-24.1851	-3.22402	0.0556007
chr14	103822406	103823150	745	21119	EIF5	ENSG00000100664	42.2622	60.893	18.6308	30.5825	3.60579	0.0532704	chr6	140247204	140247541	338	-551446	CITED2	ENSG00000164442	76.3015	56.4596	-19.8419	-39.4901	-3.41381	0.0540762
chr14	103968155	103968447	293	18990	CKB	ENSG00000166165	51.7758	70.1386	18.3628	15.264	3.10353	0.0548881	chr6	140247871	140248162	292	-552113	CITED2	ENSG00000164442	76.1824	55.2971	-20.8853	-12.199	-3.57113	0.0550422
chr14	103991348	103992096	749	-1899	CKB	ENSG00000166165	42.9701	61.766	18.7959	66.306	3.6375	0.0610056	chr6	143265030	143265177	148	1160	HIVEP2	ENSG00000010818	40.4484	18.8358	-21.6126	-30.2897	-3.07997	0.0543819
chr14	104312558	104312748	191	651	PPP1R13B	ENSG00000088808	61.9505	80.6459	18.6954	16.6136	3.40508	0.0539207	chr6	144023330	144023532	203	24124	PHACTR2	ENSG00000112419	70.534	44.0494	-26.4845	-40.5969	-3.93101	0.0586865
chr14	104745699	104745788	90	35157	C14orf144	ENSG00000228032	34.8701	55.6755	20.8054	18.3758	3.1305	0.0587859	chr6	144417437	144417648	212	-682	SF3B5	ENSG00000169976	35.4703	19.7192	-15.7512	-36.4065	-3.00341	0.0561394
chr14	104766487	104767147	661	55945	C14orf144	ENSG00000228032	21.1905	44.4411	23.2506	102.182	4.51446	0.0641021	chr6	144538408	144538719	312	66744	STX11	ENSG00000135604	37.0782	18.7539	-18.3243	-41.6292	-3.44838	0.0566187
chr14	105011886	105012023	138	-33997	C14orf180	ENSG00000184601	24.0612	45.7379	21.6767	44.7654	3.30593	0.0613145	chr6	146134159	146134405	247	1483	FBXO30	ENSG00000118496	36.5248	18.0869	-18.4379	-13.1666	-3.01968	0.0538219
chr14	105040236	105040488	253	-5532	C14orf180	ENSG00000184601	41.5879	58.6789	17.091	23.3122	3.48517	0.0544534	chr6	147830731	147831309	579	368	SAMD5	ENSG00000203727	42.1862	25.0012	-17.185	-61.6191	-3.06158	0.0547445
chr14	105052520	105053037	518	5041	C14orf180	ENSG00000184601	31.4155	54.2021	22.7865	78.8011	4.32268	0.064275	chr6	148513136	148514391	1256	-79048	SASH1	ENSG00000111961	73.7747	53.183	-20.5918	-57.9752	-3.01299	0.0653028
chr14	105053347	105053355	9	5868	C14orf180	ENSG00000184601	35.6891	52.5564	16.8673	9.19568	3.10177	0.0643712	chr6	148544192	148544707	516	-48732	SASH1	ENSG00000111961	74.4616	59.9645	-14.4972	-19.6729	-3.02737	0.0537923
chr15	28036803	28037303	501	271684	GABRG3	ENSG00000182256	23.0259	43.2976	20.2717	21.6499	3.13101	0.0524599	chr6	148663197	148663270	74	-458	SASH1	ENSG00000111961	61.183	38.4277	-22.7553	-11.9363	-3.91964	0.0537923
chr15	28342547	28343145	599	1293	OCA2	ENSG00000104044	52.9752	75.2098	22.2347	22.0901	7.05978	0.0508053	chr6	148760844	148761800	957	97114	SASH1	ENSG00000111961	73.1031	50.6867	-22.4164	-83.5854	-3.04686	0.0550881
chr15	28702657	28703058	402	75058	GOLGA8G	ENSG00000183629	43.9593	68.9251	24.9658	116.446	5.7434	0.0607398	chr6	148792891	148793071	181	129161	SASH1	ENSG00000111961	65.0866	44.6048	-20.4818	-21.3876	-3.02519	0.0544652
chr15	29260601	29261284	684	7093	APBA2	ENSG00000034053	51.7412	72.731	20.9898	43.6283	3.93453	0.0597348	chr6	148822168	148823033	866	158438	SASH1	ENSG00000111961	69.0845	41.4003	-27.6842	-39.4445	-3.01533	0.0638947
chr15	29864988	29865374	387	-2060	FAM189A1	ENSG00000104059	39.6165	62.2102	22.5937	12.5828	3.29923	0.0601221	chr6	148834150	148834532	383	170420	SASH1	ENSG00000111961	70.0647	27.4016	-42.6631	-45.037	-3.69531	0.0843626
chr15	30864630	30864640	11	20348	GOLGA8Q	ENSG00000178115	45.7163	78.0719	32.3556	16.3711	5.47111	0.0602263	chr6	148834863	148835535	673	171133	SASH1	ENSG00000111961	71.4048	33.9419	-37.4629	-62.7979	-3.30395	0.0841368
chr15	31690274	31690606	333	31916	KLF13	ENSG00000169926	38.0598	57.2787	19.2189	28.8083	3.33804	0.0552864	chr6	148839874	148840153	280	176144	SASH1	ENSG00000111961	54.7252	33.1597	-21.5655	-21.7302	-3.01522	0.0618321
chr15	31694940	31695493	554	36582	KLF13	ENSG00000169926	37.2786	56.7754	19.4968	37.4407	3.56159	0.0549259	chr6	148859825	148860216	392	196095	SASH1	ENSG00000111961	64.8725	39.3002	-25.5723	-24.462	-3.00149	0.0567516
chr15	31779116	31779680	565	120758	KLF13	ENSG00000169926	35.3526	65.8043	30.4516	45.2428	3.37144	0.0834616	chr6	149200407	149200777	371	131942	UST	ENSG00000111962	82.2296	58.8071	-23.4224	-23.0264	-3.69975	0.0582184
chr15	33411101	33412837	1737	34277	FMN1	ENSG00000248905	50.8623	73.2229	22.3606	82.694	4.46287	0.0511001	chr6	149237291	149237634	344	168826	UST	ENSG00000111962	84.8819	68.5656	-16.3163	-25.4192	-3.02395	0.0585895
chr15	34260712	34261486	775	0	CHRM5	ENSG00000184984	43.818	65.4795	21.6615	31.7242	3.27547	0.0563205	chr6	149332891	149333829	939	-205947	TAB2	ENSG00000055208	58.7787	40.7114	-18.0672	-54.2804	-3.10341	0.054342
chr15	34376369	34377140	772	16867	EMC7	ENSG00000134153	33.6507	53.2203	19.5696	38.7344	3.36978	0.0513799	chr6	149381104	149382298	1195	-157478	TAB2	ENSG00000055208	77.053	50.3294	-26.7236	-124.916	-3.20625	0.0559216
chr15	35234578	35234823	246	21830	AQR	ENSG00000021776	35.9792	68.4985	32.5193	36.6601	6.6593	0.0518553	chr6	149967906	149968518	613	1331	KATNA1	ENSG00000186625	61.8807	32.4491	-29.4316	-72.2919	-3.04591	0.0621497
chr15	35235262	35235398	137	21255	AQR	ENSG00000021776	30.4377	74.6853	44.2475	67.203	8.60785	0.0518553	chr6	151422486	151423571	1086	64375	MTHFD1L	ENSG00000120254	69.1714	46.9193	-22.2522	-56.2011	-3.08235	0.0576812
chr15	36135333	36135826	494	-296939	DPH6	ENSG00000134146	36.777	55.8934	19.1165	22.6598	3.37695	0.0563746	chr6	151563216	151563528	313	1706	AKAP12	ENSG00000131016	66.4333	29.2007	-37.2326	-30.7231	-3.68054	0.0632476
chr15	36136129	36136523	395	-297735	DPH6	ENSG00000134146	40.4488	60.661	20.2122	20.9169	3.4967	0.0552005	chr6	151563836	151564384	549	2326	AKAP12	ENSG00000131016	82.6575	51.4371	-31.2205	-44.8496	-3.07632	0.0632476
chr15	40398999	40399131	133	-152	BMF	ENSG00000104081	32.3035	54.3318	22.0284	12.8416	3.42135	0.0572689	chr6	151575032	151575152	121	13522	AKAP12	ENSG00000131016	90.3278	62.9493	-27.3785	-10.4466	-3.24101	0.0559427
chr15	40399609	40399961	353	-762	BMF	ENSG00000104081	25.9689	51.1303	25.1614	18.9804	4.10298	0.0572689	chr6	151575509	151575767	259	13999	AKAP12	ENSG00000131016	90.3415	62.624	-27.7175	-31.9833	-3.24214	0.0559427
chr15	40577261	40577751	491	-2473	ANKRD63	ENSG00000230778	48.5119	70.3568	21.8449	26.2247	4.07961	0.0619887	chr6	151631161	151631792	632	-15030	AKAP12	ENSG00000131016	89.5787	62.6205	-26.9582	-63.9158	-3.07334	0.0659008
chr15	40698650	40698723	74	374	IVD	ENSG00000128928	45.5127	59.1507	13.638	9.65937	3.23261	0.0512056	chr6	151710327	151710377	51	2305	ZBTB2	ENSG00000181472	72.3045	52.8126	-19.4919	-13.7884	-3.27792	0.0553386
chr15	40764366	40764411	46	1080	CHST14	ENSG00000169105	50.791	67.5193	16.7284	15.1366	3.04273	0.0542144	chr6	151741628	151741752	125	24007	RMND1	ENSG00000155906	89.9135	59.838	-30.0755	-14.6863	-4.79448	0.0541739
chr15	40841815	40842189	375	14989	C15orf57	ENSG00000128891	64.0563	79.6645	15.6082	21.7961	3.2003	0.0510277	chr6	151742159	151742399	241	23360	RMND1	ENSG00000155906	86.9715	64.0115	-22.9601	-14.2684	-3.12458	0.0541739
chr15	41057021	41057109	89	396	GCHFR	ENSG00000137880	16.6858	32.6597	15.9739	9.30517	3.13654	0.0516923	chr6	151803563	151804144	582	-11020	CCDC170	ENSG00000120262	64.4827	34.7821	-29.7006	-55.0602	-3.66978	0.0543741
chr15	41626064	41626355	292	952	NUSAP1	ENSG00000137804	37.907	58.6281	20.7211	22.4309	4.66544	0.050773	chr6	152000396	152000727	332	-10903	ESR1	ENSG00000091831	82.4433	63.6506	-18.7927	-57.4437	-4.14746	0.058673
chr15	41836937	41837132	196	-469	RPAP1	ENSG00000103932	51.6061	68.0255	16.4193	31.4246	3.2752	0.0523301	chr6	152011200	152011723	524	0	ESR1	ENSG00000091831	28.162	10.334	-17.828	-29.0172	-3.04151	0.063966
chr15	42209862	42210242	381	-23586	SPTBN5	ENSG00000137877	48.3948	68.4704	20.0756	27.8915	3.6646	0.0574147	chr6	152012049	152013596	1548	-417	ESR1	ENSG00000091831	43.5685	16.634	-26.9345	-88.7459	-3.60952	0.0666499
chr15	42310902	42311618	717	-8456	PLA2G4E	ENSG00000188089	29.5679	47.9546	18.3867	28.9796	3.35908	0.0509012	chr6	152078799	152079083	285	-46482	ESR1	ENSG00000091831	48.403	32.4132	-15.9898	-18.381	-3.59823	0.0547391
chr15	42904205	42905168	964	36347	STARD9	ENSG00000159433	60.2492	82.2007	21.9515	46.6386	4.16844	0.0542728	chr6	152127502	152127821	320	-509	ESR1	ENSG00000091831	53.0108	29.2227	-23.7881	-15.4371	-3.02308	0.0729053
chr15	44437781	44438317	537	48326	FRMD5	ENSG00000171877	40.4151	61.7015	21.2864	16.0127	3.34483	0.056182	chr6	152438731	152439008	278	50477	SYNE1	ENSG00000131018	69.6212	45.6677	-23.9535	-9.73445	-3.14779	0.0587493
chr15	44750600	44750869	270	-331	CTDSPL2	ENSG00000137770	57.1821	72.6413	15.4593	17.1807	3.48481	0.0514235	chr6	152551957	152552179	223	-4984	SYNE1	ENSG00000131018	80.7074	43.9207	-36.7867	-27.5491	-3.04648	0.0752422
chr15	45438631	45438809	179	7614	DUOX1	ENSG00000137857	49.5191	68.2084	18.6893	12.9963	3.30471	0.0570121	chr6	152574640	152574901	262	-27667	SYNE1	ENSG00000131018	65.406	40.3279	-25.0781	-15.7873	-3.05317	0.0553182
chr15	45926628	45926734	107	-184	SQRDL	ENSG00000137767	17.5124	39.9919	22.4795	15.0017	4.6994	0.0570015	chr6	152589214	152589566	353	33691	SYNE1	ENSG00000131018	54.698	20.0143	-34.6837	-25.4092	-3.09799	0.0671826
chr15	48005676	48005883	208	-3311	SEMA6D	ENSG00000137872	59.5892	84.1386	24.5494	15.7056	4.25283	0.0551559	chr6	152620413	152620697	285	2560	SYNE1	ENSG00000131018	79.2502	44.1695	-35.0807	-15.0069	-4.84074	0.0586045
chr15	48922839	48924020	1182	13897	FBN1	ENSG00000166147	38.1385	64.7142	26.5756	79.622	4.38152	0.0552639	chr6	152621422	152622038	617	1219	SYNE1	ENSG00000131018	64.1394	31.4905	-32.6489	-41.1684	-3.69071	0.0586045
chr15	51046054	51046273	220	-6325	SPPL2A	ENSG00000138600	70.7932	91.7968	21.0036	31.0869	3.72497	0.0578575	chr6	153359913	153361701	1789	3476	RGS17	ENSG00000091844	82.2599	54.2085	-28.0514	-66.5876	-3.22446	0.0537923
chr15	51633628	51633757	130	-68	GLDN	ENSG00000186417	49.1717	64.9917	15.82	25.9099	3.34353	0.0522131	chr6	153450678	153450740	63	1643	RGS17	ENSG00000091844	61.0228	42.9196	-18.1032	-12.7674	-3.05168	0.0546651
chr15	55593279	55593451	173	-11277	RAB27A	ENSG00000069974	38.1911	61.5981	23.4071	16.3776	4.39718	0.0551742	chr6	153471994	153472418	425	-19609	RGS17	ENSG00000091844	67.8842	52.7913	-15.0929	-44.1613	-3.00102	0.0548848
chr15	57619844	57620608	765	45190	TCF12	ENSG00000140262	11.534	26.6981	15.1641	47.7588	3.56438	0.0531353	chr6	154799611	154799716	106	0	CNKSR3	ENSG00000153721	47.4456	30.2203	-17.2253	-12.8713	-3.12998	0.0546882
chr15	57798371	57798781	411	-85324	GCOM1	ENSG00000137878	48.2624	64.6119	16.3495	24.2987	3.07637	0.0538995	chr6	154808704	154808883	180	-9078	CNKSR3	ENSG00000153721	79.3946	58.1248	-21.2697	-10.7506	-3.084	0.0572577
chr15	58540148	58540602	455	30859	ALDH1A2	ENSG00000128918	53.5634	71.558	17.9946	24.3096	3.0633	0.0543058	chr6	154829740	154830079	340	1713	CNKSR3	ENSG00000153721	56.7438	31.8763	-24.8675	-32.4591	-3.5187	0.058944
chr15	59663330	59663431	102	-1460	FAM81A	ENSG00000157470	60.0423	83.8981	23.8558	18.0506	4.77072	0.0521583	chr6	155169200	155169600	401	15368	TIAM2	ENSG00000146426	87.8107	60.5942	-27.2165	-16.4526	-4.06481	0.0569274
chr15	61241209	61242107	899	279410	RORA	ENSG00000069667	34.1695	59.0916	24.9221	49.527	4.1185	0.0601918	chr6	155230765	155231008	244	76933	TIAM2	ENSG00000146426	78.3111	59.9249	-18.3862	-9.42058	-3.04339	0.0547186
chr15	62775394	62776144	751	-77419	TLN2	ENSG00000171914	59.8153	77.7265	17.9111	22.4959	4.04514	0.0509108	chr6	155448003	155448608	606	-1697	TIAM2	ENSG00000146426	70.141	51.5372	-18.6038	-41.4268	-3.08986	0.0550812
chr15	62789178	62789578	401	-63985	TLN2	ENSG00000171914	65.0175	79.6741	14.6566	12.9947	3.34928	0.0513832	chr6	155509371	155510190	820	-27580	TIAM2	ENSG00000146426	64.6263	40.651	-23.9753	-41.2496	-3.02795	0.0581207
chr15	63351451	63352158	708	-2669	TPM1	ENSG00000140416	50.5967	67.5084	16.9118	41.2331	4.05456	0.0564897	chr6	156919627	156920323	697	-178739	ARID1B	ENSG00000049618	73.832	50.7715	-23.0604	-72.6719	-3.09435	0.0778528
chr15	63372779	63373747	969	17950	TPM1	ENSG00000140416	70.7507	87.4606	16.71	70.9098	3.91552	0.0529611	chr6	157144521	157144706	186	43953	ARID1B	ENSG00000049618	72.2142	50.9896	-21.2246	-15.5508	-3.07777	0.0627488
chr15	64438108	64438789	682	-5126	SNX22	ENSG00000157734	31.7558	53.6631	21.9073	50.6107	4.4763	0.0558244	chr6	157547406	157547641	236	77360	ARID1B	ENSG00000049618	48.0093	29.0331	-18.9762	-12.6802	-3.11154	0.0577653
chr15	64674369	64674483	115	-659	KIAA0101	ENSG00000166803	34.6071	52.2944	17.6874	18.8767	3.22219	0.0587534	chr6	157866375	157866893	519	64209	ZDHHC14	ENSG00000175048	78.2571	54.8336	-23.4235	-26.4331	-3.02907	0.0638344
chr15	64910387	64911298	912	84101	OAZ2	ENSG00000180304	54.4425	79.8963	25.4538	81.9456	4.57772	0.0579814	chr6	158052824	158054058	1235	38782	ZDHHC14	ENSG00000175048	64.4971	40.6533	-23.8438	-82.3093	-3.00221	0.054073
chr15	65647201	65647376	176	872	IGDCC3	ENSG00000174498	29.3956	50.9371	21.5415	18.7138	3.96712	0.0518611	chr6	158080123	158080794	672	66081	ZDHHC14	ENSG00000175048	71.4497	42.7269	-28.7228	-63.8799	-3.0083	0.0855559
chr15	66022776	66023125	350	61336	DENND4A	ENSG00000174485	59.3908	78.2309	18.8401	12.3499	3.11408	0.0532805	chr6	158186352	158186960	609	-57335	SNX9	ENSG00000130340	69.3276	44.376	-24.9515	-101.393	-3.02515	0.0551956
chr15	66240173	66240992	820	22565	MEGF11	ENSG00000157890	35.567	56.5363	20.9693	42.1403	3.66635	0.0609921	chr6	158276793	158277182	390	32496	SNX9	ENSG00000130340	92.7983	71.7055	-21.0928	-41.0452	-3.19366	0.0538548
chr15	66560997	66562125	1129	-14911	MEGF11	ENSG00000157890	25.72	42.3409	16.6209	49.1172	3.3719	0.0557348	chr6	158403699	158404136	438	628	SYNJ2	ENSG00000078269	81.6169	59.8275	-21.7893	-44.6852	-3.31084	0.0547397
chr15	66998571	66998778	208	-2151	SMAD6	ENSG00000137834	37.2488	72.9297	35.681	12.0827	3.03881	0.0919871	chr6	158421202	158421499	298	-16997	SYNJ2	ENSG00000078269	83.0549	64.3602	-18.6948	-19.6802	-3.22293	0.0548586
chr15	67142160	67142941	782	138124	SMAD6	ENSG00000137834	69.2	95.1594	25.9594	99.9859	4.32606	0.0622785	chr6	158439158	158439761	604	660	SYNJ2	ENSG00000078269	88.0929	67.6449	-20.448	-56.2671	-3.03732	0.0568786
chr15	68215605	68216418	814	97663	SKOR1	ENSG00000188779	32.0779	58.0668	25.989	49.309	4.10925	0.0579487	chr6	158453566	158453594	29	15068	SYNJ2	ENSG00000078269	78.571	61.852	-16.719	-12.2262	-3.02143	0.054873
chr15	68348989	68349074	86	2074	PIAS1	ENSG00000033800	25.7316	46.9027	21.1711	10.7119	3.7219	0.0519244	chr6	158519458	158519815	358	20277	SERAC1	ENSG00000122335	76.4349	57.103	-19.332	-12.9403	-3.13947	0.0545541
chr15	70051682	70052126	445	306458	RPLP1	ENSG00000137818	51.1118	61.2564	10.1446	15.2765	3.08039	0.050773	chr6	158619944	158620134	191	30559	GTF2H5	ENSG00000272047	72.8315	54.7001	-18.1314	-9.4255	-3.05736	0.0544995
chr15	70325195	70325780	586	61343	TLE3	ENSG00000140332	33.351	56.1512	22.8002	50.9183	4.36065	0.0518824	chr6	158652304	158652423	120	62919	GTF2H5	ENSG00000272047	66.3303	47.4851	-18.8452	-21.1219	-3.17674	0.0566401
chr15	70447619	70448074	456	-57103	TLE3	ENSG00000140332	34.2416	59.8278	25.5862	31.5156	4.14701	0.0576767	chr6	158732117	158732439	323	-1252	TULP4	ENSG00000130338	52.8622	31.6668	-21.1953	-19.9084	-3.23644	0.0566724
chr15	73092665	73094709	2045	-14477	ADPGK	ENSG00000159322	23.8767	47.9557	24.0789	121.461	4.75387	0.0526035	chr6	159066445	159066526	82	-673	DYNLT1	ENSG00000146425	53.1866	31.3277	-21.8589	-15.2942	-3.59837	0.0537923
chr15	75104894	75105542	649	0	LMAN1L	ENSG00000140506	30.7152	47.9058	17.1906	46.7076	3.49015	0.0518202	chr6	159126403	159126947	545	42207	SYTL3	ENSG00000164674	72.4026	44.7624	-27.6402	-61.9671	-3.64669	0.0582329
chr15	75247310	75247972	663	981	RPP25	ENSG00000178718	46.8491	80.5108	33.6616	54.0178	4.70404	0.0712111	chr6	159655312	159655481	170	36832	FNDC1	ENSG00000164694	37.9912	14.8486	-23.1427	-54.7441	-3.1066	0.0680387
chr15	75867400	75867593	194	4036	PTPN9	ENSG00000169410	55.0283	67.7989	12.7706	44.5135	3.29537	0.0526518	chr6	160147226	160147281	56	608	WTAP	ENSG00000146457	46.9385	29.5346	-17.4038	-9.22452	-3.0509	0.0538803
chr15	76469817	76469967	151	114864	ETFA	ENSG00000140374	32.9713	50.4375	17.4662	15.5503	3.16091	0.0631717	chr6	160209275	160209440	166	30	TCP1	ENSG00000120438	74.4665	48.6092	-25.8574	-18.2595	-3.27072	0.0553656
chr15	76640005	76640505	501	10939	ISL2	ENSG00000159556	29.4468	66.0217	36.5749	92.7149	8.00456	0.0545135	chr6	160509927	160510511	585	3833	IGF2R	ENSG00000197081	63.7699	35.2669	-28.503	-82.1473	-3.30517	0.0673411
chr15	77709796	77710133	338	2308	PEAK1	ENSG00000173517	16.2946	38.1948	21.9002	17.361	4.6853	0.0530339	chr6	160940520	160940670	151	144620	LPA	ENSG00000198670	71.9547	53.449	-18.5056	-14.496	-3.12901	0.0549557
chr15	78279196	78279602	407	14423	TBC1D2B	ENSG00000167202	16.8894	35.8307	18.9413	70.4805	3.30211	0.0618272	chr6	161459571	161460301	731	16344	MAP3K4	ENSG00000085511	53.7305	28.9269	-24.8036	-39.3097	-3.41764	0.0613298
chr15	79153274	79153593	320	-11524	MORF4L1	ENSG00000185787	47.8787	69.7567	21.878	43.5458	3.9036	0.0537735	chr6	161693333	161693950	618	1100	AGPAT4	ENSG00000026652	52.4969	30.6323	-21.8646	-44.2989	-3.3329	0.0573067
chr15	81622521	81622640	120	-6054	STARD5	ENSG00000172345	61.4947	80.3501	18.8553	10.0128	3.61287	0.05439	chr6	161897426	161897863	438	-202332	AGPAT4	ENSG00000026652	46.074	28.3888	-17.6852	-32.2563	-3.09214	0.0579383
chr15	81623155	81623999	845	-6688	STARD5	ENSG00000172345	49.2782	77.0102	27.732	79.4675	5.40199	0.0540057	chr6	162761822	162761898	77	-386265	PACRG	ENSG00000112530	66.8951	52.688	-14.2071	-9.11416	-3.0019	0.0622633
chr15	83951388	83951468	81	602	BNC1	ENSG00000169594	45.4877	60.4006	14.9129	12.3871	3.12886	0.0526737	chr6	163756351	163757364	1014	-78310	QKI	ENSG00000112531	57.9104	38.2884	-19.622	-151.596	-3.17015	0.0626582
chr15	89065150	89065394	245	14170	DET1	ENSG00000140543	40.4111	62.444	22.0329	11.8685	4.01764	0.0523931	chr6	163817857	163818786	930	-16888	QKI	ENSG00000112531	49.5887	31.1819	-18.4068	-84.8412	-3.06267	0.0586674
chr15	90040977	90041770	794	-1132	RHCG	ENSG00000140519	46.3883	62.6901	16.3018	46.3099	3.44879	0.0527231	chr6	164373719	164374297	579	417606	QKI	ENSG00000112531	54.9813	36.3079	-18.6734	-70.6594	-3.18119	0.0581633
chr15	90583928	90584491	564	-26754	ZNF710	ENSG00000140548	48.3404	67.0545	18.7141	26.6904	3.55289	0.0529349	chr6	166260004	166260274	271	49450	SDIM1	ENSG00000256391	42.8821	30.6562	-12.226	-21.4634	-3.01522	0.057942
chr15	90644410	90644475	66	-482	IDH2	ENSG00000182054	23.3586	50.5908	27.2322	13.871	4.69204	0.0555541	chr6	166797552	166797748	197	-1065	MPC1	ENSG00000060762	58.7151	29.7065	-29.0086	-47.3069	-3.41058	0.0537923
chr15	90949280	90949815	536	17770	IQGAP1	ENSG00000140575	60.4524	76.4659	16.0135	43.4877	3.17293	0.0547732	chr6	166955567	166956222	656	0	RPS6KA2	ENSG00000071242	61.5692	47.0756	-14.4935	-42.6562	-3.15439	0.0607491
chr15	91180723	91181638	916	43777	CRTC3	ENSG00000140577	55.4623	77.3208	21.8585	59.6936	4.65597	0.0521344	chr6	166967028	166968345	1318	-8849	RPS6KA2	ENSG00000071242	51.3714	26.7541	-24.6173	-120.894	-3.14354	0.0620551
chr15	91346585	91347071	487	-64750	FURIN	ENSG00000140564	56.5145	74.0874	17.5729	32.7821	3.72047	0.0510752	chr6	166980618	166980804	187	-22439	RPS6KA2	ENSG00000071242	61.6371	44.1624	-17.4747	-18.7246	-3.03101	0.0541453
chr15	92519647	92521019	1373	122295	SLCO3A1	ENSG00000176463	42.9551	73.2017	30.2466	102.831	4.8402	0.0531782	chr6	167418798	167419106	309	5901	FGFR1OP	ENSG00000213066	91.1193	70.2618	-20.8575	-25.665	-3.04737	0.0549019
chr15	92567736	92569416	1681	170384	SLCO3A1	ENSG00000176463	46.7971	75.0587	28.2615	83.4495	5.88849	0.053545	chr6	167805334	167805538	205	-7335	TCP10	ENSG00000203690	70.4144	50.9604	-19.454	-12.0724	-3.00225	0.0642261
chr15	93449469	93449544	76	1765	CHD2	ENSG00000173575	23.3965	42.5222	19.1257	10.6852	3.57734	0.0542008	chr6	168121153	168121555	403	-74654	AL009178.1	ENSG00000269155	67.3903	44.0806	-23.3097	-62.2353	-3.04337	0.074282
chr15	95835860	95836343	484	936656	MCTP2	ENSG00000140563	43.4176	63.9696	20.5521	43.5942	4.12548	0.0680259	chr6	168137328	168137371	44	-58838	AL009178.1	ENSG00000269155	59.1846	44.3043	-14.8804	-12.1808	-3.0397	0.0541853
chr15	96472641	96473092	452	358567	AC016251.1	ENSG00000205148	53.597	74.5682	20.9711	25.6673	5.09467	0.050773	chr6	168197263	168197505	243	20	C6orf123	ENSG00000146521	66.6558	44.5255	-22.1304	-71.953	-3.02066	0.0622902
chr15	96473458	96474913	1456	356746	AC016251.1	ENSG00000205148	44.6578	67.2084	22.5506	97.9706	5.48363	0.050773	chr6	168398519	168399055	537	-716	KIF25	ENSG00000125337	43.8829	18.206	-25.677	-35.1167	-3.20149	0.0670369
chr15	96796064	96796565	502	35094	AC016251.1	ENSG00000205148	55.884	71.8864	16.0024	25.1983	3.75504	0.050773	chr6	168416213	168417576	1364	-976	KIF25	ENSG00000125337	67.1949	47.4575	-19.7374	-147.306	-3.05942	0.055729
chr15	99449036	99449146	111	15465	IGF1R	ENSG00000140443	35.7812	54.3014	18.5202	10.0551	3.45356	0.0521911	chr6	168451456	168451541	86	16546	FRMD1	ENSG00000153303	41.4681	22.7212	-18.7469	-9.24798	-3.07205	0.064425
chr15	99558996	99559232	237	-7971	PGPEP1L	ENSG00000183571	32.6845	60.0095	27.325	64.6266	3.5286	0.0767797	chr6	168617168	168617527	360	102862	DACT2	ENSG00000164488	58.729	38.7862	-19.9428	-26.77	-3.0573	0.0599691
chr15	99970925	99971350	426	-46019	MEF2A	ENSG00000068305	66.6942	84.978	18.2838	57.8474	3.57294	0.0532932	chr6	168768455	168768719	265	-48020	DACT2	ENSG00000164488	39.6403	23.4416	-16.1986	-22.1318	-3.0908	0.063444
chr15	100299968	100300684	717	-26325	LYSMD4	ENSG00000183060	46.6129	67.8067	21.1939	39.0522	3.89852	0.0574943	chr6	169017534	169017990	457	-35773	SMOC2	ENSG00000112562	42.1723	21.0717	-21.1006	-34.1768	-3.01791	0.0635733
chr15	100348502	100349220	719	308	CTD-2054N24.2	ENSG00000259363	52.2772	76.4371	24.1599	32.28	4.11785	0.0584105	chr6	169284504	169284577	74	230739	SMOC2	ENSG00000112562	49.983	33.3878	-16.5952	-13.3865	-3.23834	0.0599047
chr15	100708207	100708486	280	-58894	ADAMTS17	ENSG00000140470	33.4754	51.1103	17.6348	40.0003	3.13102	0.0551837	chr6	169396193	169396794	602	-255451	THBS2	ENSG00000186340	77.6215	46.8313	-30.7902	-100.062	-3.33727	0.0702049
chr15	100756088	100756948	861	-106775	ADAMTS17	ENSG00000140470	27.9952	44.6706	16.6754	59.5035	3.46363	0.0516669	chr6	169397291	169397321	31	-254924	THBS2	ENSG00000186340	71.4059	51.6282	-19.7776	-9.82447	-3.18531	0.0695767
chr15	100912874	100913030	157	-30663	ADAMTS17	ENSG00000140470	19.8738	38.2652	18.3914	17.2567	3.51039	0.0542125	chr6	169475670	169476152	483	-176093	THBS2	ENSG00000186340	47.9596	28.1941	-19.7655	-35.3142	-3.07855	0.059867
chr15	101110582	101110835	254	-25656	CERS3	ENSG00000154227	53.3434	74.1655	20.8221	10.3279	3.60498	0.050773	chr6	169613545	169613779	235	-38466	THBS2	ENSG00000186340	56.7539	40.2805	-16.4734	-65.5636	-3.00357	0.0571349
chr15	101111222	101112069	848	25071	LINS	ENSG00000140471	50.8492	72.4949	21.6456	32.3166	3.87469	0.050773	chr6	169630013	169630490	478	-21755	THBS2	ENSG00000186340	74.2911	47.1642	-27.1269	-25.2777	-3.05109	0.0717798
chr15	101300331	101300443	113	-117475	ALDH1A3	ENSG00000184254	47.8329	61.5781	13.7452	15.1319	3.04165	0.0535424	chr6	169651576	169652414	839	0	THBS2	ENSG00000186340	52.6697	18.1459	-34.5238	-87.3054	-3.15917	0.0780885
chr15	101689539	101689859	321	102277	CHSY1	ENSG00000131873	68.4845	87.7506	19.266	22.2844	3.24197	0.0550338	chr6	169654652	169654874	223	-512	THBS2	ENSG00000186340	45.1434	23.5614	-21.582	-39.0735	-3.02929	0.055435
chr15	102031621	102032720	1100	-1433	PCSK6	ENSG00000140479	34.7433	61.8593	27.1159	105.983	5.607	0.0634587	chr6	169692419	169692757	339	-38279	THBS2	ENSG00000186340	52.9325	36.0948	-16.8376	-22.0844	-3.0694	0.0578272
chr16	506640	507447	808	-17402	RAB11FIP3	ENSG00000090565	27.1234	51.9269	24.8035	84.9071	4.74358	0.0597716	chr6	169827750	169829085	1336	-173610	THBS2	ENSG00000186340	44.9418	19.5254	-25.4164	-126.562	-3.2889	0.0614897
chr16	507842	508061	220	-16788	RAB11FIP3	ENSG00000090565	34.8266	53.0155	18.189	22.2621	3.41911	0.0597716	chr6	170065709	170066024	316	-4920	WDR27	ENSG00000184465	71.1438	47.6791	-23.4648	-39.6489	-3.07004	0.0576638
chr16	809803	809962	160	-799	MSLN	ENSG00000102854	36.9783	68.6406	31.6623	31.6127	3.27483	0.0752177	chr6	170122719	170122792	74	1234	PHF10	ENSG00000130024	37.3159	16.815	-20.5009	-10.5766	-3.10761	0.059964
chr16	952140	952645	506	44998	LMF1	ENSG00000103227	51.7184	73.9805	22.2621	71.6254	3.88273	0.0522398	chr6	170163293	170164203	911	11399	ERMARD	ENSG00000130023	80.9489	53.3275	-27.6214	-78.3985	-3.16096	0.0657081
chr16	1069051	1069780	730	37242	SOX8	ENSG00000005513	29.9526	51.4525	21.4999	179.078	3.9152	0.0793172	chr6	170180156	170181655	1500	28262	ERMARD	ENSG00000130023	82.0086	35.9309	-46.0777	-124.492	-3.31361	0.0739837
chr16	1139166	1139837	672	6406	C1QTNF8	ENSG00000184471	34.5833	56.005	21.4217	108.486	4.98081	0.0534151	chr6	170354050	170354511	462	202156	ERMARD	ENSG00000130023	45.869	22.8689	-23.0001	-41.3893	-3.14194	0.0774075
chr16	1335425	1335597	173	-23283	UBE2I	ENSG00000103275	44.7006	60.3587	15.6581	16.3425	3.43254	0.0571387	chr6	170452742	170452839	98	146721	DLL1	ENSG00000198719	63.8623	39.8605	-24.0018	-24.3554	-3.00046	0.0783372
chr16	2237386	2237509	124	9016	CASKIN1	ENSG00000167971	54.961	69.9321	14.9711	34.1427	3.14943	0.0534043	chr6	170479988	170481344	1357	118216	DLL1	ENSG00000198719	47.0148	20.5475	-26.4673	-192.607	-3.11963	0.0573021
chr16	2742046	2742435	390	9504	KCTD5	ENSG00000167977	59.3064	78.4668	19.1604	44.6686	3.90145	0.053455	chr6	170557582	170558329	748	41231	DLL1	ENSG00000198719	49.0848	19.311	-29.7738	-158.786	-3.03307	0.0616286
chr16	2810765	2810863	99	7320	SRRM2	ENSG00000167978	62.0361	79.2885	17.2524	10.6816	3.92253	0.0521134	chr6	170571570	170571810	241	27750	DLL1	ENSG00000198719	72.4111	53.8016	-18.6096	-53.9471	-3.00957	0.0671987
chr16	3002797	3003017	221	-10927	KREMEN2	ENSG00000131650	45.8735	64.6436	18.7701	34.4092	3.60613	0.0566087	chr6	170585777	170586133	357	13427	DLL1	ENSG00000198719	38.8937	18.8578	-20.0359	-54.1854	-3.01423	0.0649683
chr16	4012928	4013578	651	25422	ADCY9	ENSG00000162104	47.1511	69.1262	21.975	95.0743	4.30288	0.0592014	chr6	170742917	170743573	657	118855	PSMB1	ENSG00000008018	77.0883	49.4071	-27.6812	-63.9097	-3.2338	0.0561778
chr16	4216111	4217012	902	-49924	ADCY9	ENSG00000162104	63.7425	81.7577	18.0153	60.0122	3.73424	0.0515539	chr6	170759820	170760610	791	101818	PSMB1	ENSG00000008018	78.4819	55.2364	-23.2455	-53.0065	-3.00189	0.0607679
chr16	4239565	4240230	666	49513	SRL	ENSG00000185739	34.4485	57.871	23.4225	48.7608	3.60684	0.0627229	chr7	179032	179667	636	-13301	FAM20C	ENSG00000177706	57.7316	29.4001	-28.3315	-163.675	-3.04304	0.0602924
chr16	4254189	4254628	440	35115	SRL	ENSG00000185739	56.5045	74.6865	18.1819	43.5168	3.15595	0.0517192	chr7	209571	210100	530	16601	FAM20C	ENSG00000177706	72.8796	41.6938	-31.1858	-80.6645	-3.10585	0.0751626
chr16	4389270	4389628	359	4133	PAM16	ENSG00000217930	41.9468	56.7391	14.7923	43.901	3.2521	0.0554396	chr7	612743	612977	235	29342	PRKAR1B	ENSG00000188191	57.379	28.9022	-28.4768	-43.0258	-3.01689	0.0852893
chr16	4427185	4427447	263	5335	VASN	ENSG00000168140	38.5274	56.2679	17.7405	42.992	3.87042	0.0617388	chr7	640586	640894	309	1425	PRKAR1B	ENSG00000188191	79.7002	61.4266	-18.2736	-56.0598	-3.01982	0.0588928
chr16	4942972	4942988	17	22082	UBN1	ENSG00000118900	22.022	34.4895	12.4675	9.19602	3.07966	0.0526025	chr7	686155	686470	316	-43834	PRKAR1B	ENSG00000188191	63.8683	48.6628	-15.2055	-34.5475	-3.05118	0.0551609
chr16	9353827	9354127	301	168321	C16orf72	ENSG00000182831	17.6808	33.8113	16.1305	15.4803	3.11572	0.0545935	chr7	1116172	1116550	379	-5293	GPER1	ENSG00000164850	78.1326	49.4912	-28.6413	-45.8803	-3.0634	0.0772689
chr16	11001136	11001415	280	28309	CIITA	ENSG00000179583	42.4894	62.9073	20.4179	51.7903	3.64583	0.0557434	chr7	1121420	1122160	741	0	GPER1	ENSG00000164850	57.4183	18.7052	-38.7131	-165.341	-3.14132	0.0850227
chr16	11589119	11589939	821	-3507	CTD-3088G3.8	ENSG00000188897	51.7568	78.9776	27.2208	55.5987	5.05484	0.0537402	chr7	1401573	1401836	264	97125	MICALL2	ENSG00000164877	56.0319	37.1496	-18.8822	-33.6745	-3.01013	0.0573307
chr16	11691448	11692566	1119	0	LITAF	ENSG00000189067	30.374	56.0252	25.6511	105.465	4.21646	0.0663144	chr7	1573125	1573180	56	2774	MAFK	ENSG00000198517	56.5017	33.4788	-23.0229	-9.71158	-3.20392	0.0567292
chr16	11707566	11708787	1222	14278	LITAF	ENSG00000189067	51.9958	76.3727	24.3769	93.7926	4.9362	0.0542388	chr7	1576153	1576339	187	-2004	MAFK	ENSG00000198517	68.2392	41.9267	-26.3124	-19.0742	-3.28021	0.0558417
chr16	12065895	12066174	280	-3561	AC007216.2	ENSG00000269121	53.4517	69.5697	16.118	28.1397	3.24759	0.0519382	chr7	1610860	1611305	446	-218	PSMG3	ENSG00000157778	84.553	61.7422	-22.8107	-19.906	-3.00535	0.0648654
chr16	12069782	12069890	109	600	RP11-166B2.1	ENSG00000234719	28.7708	46.7729	18.0022	26.6375	3.49223	0.0533413	chr7	1679711	1679875	165	-47879	ELFN1	ENSG00000225968	68.3372	49.9686	-18.3687	-15.2687	-3.01263	0.060673
chr16	12897025	12897262	238	445	CPPED1	ENSG00000103381	34.7067	51.9515	17.2448	39.475	4.28115	0.0544261	chr7	1686736	1687244	509	-40510	ELFN1	ENSG00000225968	71.3431	40.4702	-30.8729	-116.881	-3.0197	0.0905989
chr16	14041701	14042712	1012	27686	ERCC4	ENSG00000175595	49.4295	86.1391	36.7096	128.687	7.42297	0.0592034	chr7	1787205	1787439	235	2971	ELFN1	ENSG00000225968	61.1589	37.3583	-23.8006	-45.2779	-3.0677	0.0645741
chr16	14333812	14334244	433	39624	MKL2	ENSG00000186260	43.0683	61.4214	18.3531	37.6992	3.5722	0.0595879	chr7	1953916	1954312	397	25872	MAD1L1	ENSG00000002822	92.4242	63.1411	-29.2831	-87.9697	-3.02055	0.0730714
chr16	15239121	15239752	632	-50946	RRN3	ENSG00000085721	39.1064	64.9895	25.8831	95.478	3.28458	0.0833797	chr7	2013895	2014292	398	6133	MAD1L1	ENSG00000002822	79.6295	59.7192	-19.9103	-16.9085	-3.11514	0.0551173
chr16	15754400	15754910	511	-3673	NDE1	ENSG00000072864	57.6517	77.1442	19.4925	46.7147	3.80453	0.0527004	chr7	2122068	2122330	263	-2419	MAD1L1	ENSG00000002822	61.1552	39.5827	-21.5726	-39.2828	-3.02707	0.0578744
chr16	17364399	17364540	142	200197	XYLT1	ENSG00000103489	71.2194	89.5606	18.3412	18.2654	3.06221	0.0541715	chr7	2144579	2144697	119	2645	MAD1L1	ENSG00000002822	57.692	37.8059	-19.8861	-18.6619	-3.02008	0.0629716
chr16	17396775	17397551	777	167186	XYLT1	ENSG00000103489	57.1573	81.1698	24.0125	39.3664	4.44983	0.0566429	chr7	2168916	2169326	411	-19679	MAD1L1	ENSG00000002822	71.52	47.4166	-24.1034	-78.2111	-3.1311	0.0626159
chr16	17397855	17398015	161	166722	XYLT1	ENSG00000103489	46.4968	68.2272	21.7305	10.6285	3.77224	0.0566429	chr7	2198138	2198195	58	-48901	MAD1L1	ENSG00000002822	74.0965	51.5561	-22.5404	-11.3074	-3.69447	0.0590749
chr16	17422996	17424283	1288	140454	XYLT1	ENSG00000103489	38.5527	63.2839	24.7312	65.4093	5.00057	0.0576741	chr7	2289097	2289223	127	6556	NUDT1	ENSG00000106268	71.6795	54.3001	-17.3794	-18.6526	-3.00969	0.0556475
chr16	19893426	19894307	882	0	GPRC5B	ENSG00000167191	23.1483	63.0171	39.8688	90.8338	6.90783	0.0633954	chr7	2451691	2452205	515	7956	CHST12	ENSG00000136213	55.9908	29.279	-26.7119	-26.2491	-3.0286	0.0688876
chr16	21359475	21360001	527	-45070	CRYM	ENSG00000103316	25.5467	47.7527	22.206	21.6831	3.85277	0.0582609	chr7	2542478	2543197	720	-8965	LFNG	ENSG00000106003	74.0379	43.2138	-30.8241	-107.698	-3.16384	0.0655961
chr16	21360320	21360765	446	-45915	CRYM	ENSG00000103316	34.7627	59.9527	25.19	61.2039	4.45378	0.0582609	chr7	2598121	2598260	140	-371	IQCE	ENSG00000106012	51.0556	29.4977	-21.5578	-17.2955	-3.24902	0.0573686
chr16	21649896	21650228	333	13698	IGSF6	ENSG00000140749	47.7405	65.5391	17.7986	12.9216	3.52613	0.0525768	chr7	2768454	2768742	289	34031	GNA12	ENSG00000146535	77.8939	51.8987	-25.9952	-48.9052	-3.00173	0.0691431
chr16	21845625	21845871	247	3219	NPIPB4	ENSG00000185864	37.6933	59.1522	21.4589	9.84952	3.50919	0.0624237	chr7	2864965	2865478	514	-10071	GNA12	ENSG00000146535	87.9671	67.6609	-20.3061	-53.896	-3.03714	0.0551083
chr16	22235995	22236495	501	18391	EEF2K	ENSG00000103319	45.3171	62.6209	17.3038	34.1522	3.54338	0.0557086	chr7	2943926	2944317	392	25376	CARD11	ENSG00000198286	49.9253	31.5327	-18.3927	-52.728	-3.00839	0.0560677
chr16	23153352	23153812	461	6778	USP31	ENSG00000103404	44.2875	73.2077	28.9202	32.5296	4.99417	0.0611355	chr7	3018462	3018949	488	-48767	CARD11	ENSG00000198286	46.2048	16.9395	-29.2653	-55.1493	-3.03457	0.0876497
chr16	23154659	23154992	334	5598	USP31	ENSG00000103404	50.6337	74.4078	23.7741	15.0098	4.82718	0.0617777	chr7	4296200	4296900	701	305647	SDK1	ENSG00000146555	30.9029	15.3427	-15.5601	-59.271	-3.00201	0.0582541
chr16	26828543	26829494	952	-385312	KDM8	ENSG00000155666	27.1153	48.029	20.9137	52.4499	3.45096	0.0531014	chr7	4652842	4653006	165	-30381	FOXK1	ENSG00000164916	47.237	28.6977	-18.5393	-19.0075	-3.05244	0.0613471
chr16	27245712	27245741	30	-1312	NSMCE1	ENSG00000169189	34.5001	51.9368	17.4367	9.69006	3.24628	0.0571714	chr7	4691173	4691528	356	7784	FOXK1	ENSG00000164916	79.2251	61.5207	-17.7044	-22.5214	-3.06032	0.0602715
chr16	27661823	27662120	298	76594	KIAA0556	ENSG00000047578	40.2827	64.3834	24.1008	33.3338	3.76909	0.0562674	chr7	4837383	4837599	217	22118	AP5Z1	ENSG00000242802	61.0431	37.3537	-23.6894	-19.5284	-3.02717	0.0553337
chr16	27735217	27736118	902	149988	KIAA0556	ENSG00000047578	55.5023	80.4282	24.9258	61.761	3.64711	0.0617634	chr7	4859290	4859778	489	17909	RADIL	ENSG00000157927	83.9288	54.1806	-29.7482	-69.2121	-3.0366	0.111341
chr16	28573379	28573558	180	8131	CCDC101	ENSG00000176476	53.4256	70.5709	17.1454	19.4515	3.27735	0.0541759	chr7	5352916	5353167	252	7070	TNRC18	ENSG00000182095	86.6873	67.1425	-19.5448	-64.1263	-3.09159	0.0575198
chr16	29262594	29263247	654	152102	NPIPB11	ENSG00000254206	28.2643	68.7722	40.5079	119.122	4.34031	0.111092	chr7	5510767	5510884	118	30665	FBXL18	ENSG00000155034	73.0592	53.6022	-19.457	-24.721	-3.01295	0.0631877
chr16	29315606	29315897	292	99452	NPIPB11	ENSG00000254206	38.1814	57.445	19.2636	32.8703	3.40589	0.0576269	chr7	5554152	5554176	25	-722	FBXL18	ENSG00000155034	65.2014	45.2076	-19.9938	-9.02818	-3.0041	0.0579584
chr16	29338575	29339662	1088	75687	NPIPB11	ENSG00000254206	24.168	48.3639	24.196	63.0817	4.33493	0.0654932	chr7	6316480	6317866	1387	-4204	CYTH3	ENSG00000008256	86.6514	57.3566	-29.2949	-103.902	-3.1842	0.0550098
chr16	30323379	30323595	217	42659	CD2BP2	ENSG00000169217	64.4843	79.1446	14.6603	9.46162	3.26657	0.0528774	chr7	6486457	6486611	155	951	DAGLB	ENSG00000164535	69.6604	49.0224	-20.638	-19.9134	-3.00313	0.0581518
chr16	30627930	30628199	270	-6229	ZNF689	ENSG00000156853	44.1974	65.1632	20.9658	25.0201	3.76845	0.0566281	chr7	6519937	6520633	697	-2288	FLJ20306	ENSG00000269781	73.2901	45.404	-27.8861	-39.6796	-3.25641	0.0677071
chr16	30958828	30959290	463	-1096	ORAI3	ENSG00000175938	29.5511	48.2444	18.6933	54.5173	5.8575	0.052805	chr7	7934493	7935324	832	-73100	GLCCI1	ENSG00000106415	78.2322	56.2118	-22.0204	-30.7505	-3.05741	0.0573504
chr16	46776581	46777543	963	4677	MYLK3	ENSG00000140795	32.2319	55.3702	23.1382	78.1084	3.79107	0.0732629	chr7	8010675	8012262	1588	1356	GLCCI1	ENSG00000106415	83.818	49.6698	-34.1482	-86.5316	-3.0417	0.0665878
chr16	49732314	49732623	310	-34177	ZNF423	ENSG00000102935	23.218	57.0003	33.7822	71.9658	3.75893	0.0743291	chr7	12726036	12726099	64	-381	ARL4A	ENSG00000122644	48.979	23.6641	-25.3149	-24.0095	-3.49661	0.0576727
chr16	50745926	50746198	273	0	NOD2	ENSG00000167207	42.8722	61.2601	18.3879	55.3378	3.36296	0.0559761	chr7	13763505	13764408	904	261657	ETV1	ENSG00000006468	61.8977	46.4188	-15.4788	-29.3879	-3.04248	0.057827
chr16	51671563	51671870	308	389412	C16orf97	ENSG00000261190	19.9858	31.2215	11.2358	28.3354	3.17201	0.059692	chr7	15501240	15502218	979	-95392	AGMO	ENSG00000187546	40.6749	22.6409	-18.034	-25.1075	-3.0518	0.0550488
chr16	53470182	53471078	897	650	RBL2	ENSG00000103479	48.3774	78.6777	30.3003	39.5731	5.80716	0.0572626	chr7	16683991	16684067	77	1374	ANKMY2	ENSG00000106524	65.681	39.4443	-26.2367	-15.5994	-3.61289	0.0555666
chr16	54143440	54144915	1476	135961	RP11-324D17.1	ENSG00000259517	55.8945	83.7941	27.8996	116.576	5.6903	0.0606325	chr7	17980977	17981015	39	-859	SNX13	ENSG00000071189	70.2652	38.6219	-31.6433	-15.9501	-5.02606	0.0572783
chr16	54351063	54351531	469	-30387	IRX3	ENSG00000177508	31.0723	57.3046	26.2324	50.3934	3.23455	0.0708401	chr7	19147936	19148335	400	8959	TWIST1	ENSG00000122691	79.6161	49.4413	-30.1748	-51.1144	-3.36989	0.0625308
chr16	54546380	54547478	1099	-225704	IRX3	ENSG00000177508	39.6468	74.7102	35.0634	143.203	5.27758	0.0634	chr7	20838895	20839015	121	-12389	SP8	ENSG00000164651	39.2714	17.3026	-21.9688	-17.5849	-3.32772	0.057962
chr16	55406018	55406350	333	-17261	MMP2	ENSG00000087245	38.8265	60.584	21.7575	29.4856	3.32972	0.05752	chr7	20839354	20839506	153	-12848	SP8	ENSG00000164651	47.2081	23.8532	-23.3549	-18.869	-3.7653	0.057962
chr16	55542668	55542784	117	-125	LPCAT2	ENSG00000087253	32.2785	54.8194	22.5409	25.6463	4.72042	0.0524757	chr7	22539317	22539363	47	432	STEAP1B	ENSG00000105889	57.5714	40.8653	-16.7061	-12.5352	-3.05635	0.0556984
chr16	56448032	56449080	1049	9702	AMFR	ENSG00000159461	52.7522	73.2801	20.5279	41.8066	4.02619	0.0515539	chr7	23222593	23222684	92	909	NUPL2	ENSG00000136243	79.3232	58.3527	-20.9705	-13.0984	-3.0139	0.0600526
chr16	56457177	56457789	613	993	AMFR	ENSG00000159461	44.3698	64.0289	19.6591	16.9507	3.75619	0.052718	chr7	23286420	23286546	127	25	GPNMB	ENSG00000136235	34.2002	13.5229	-20.6773	-15.3385	-3.00191	0.0659039
chr16	56774864	56774948	85	237	NUP93	ENSG00000102900	48.9329	72.3488	23.4159	15.8434	3.23997	0.0669485	chr7	23339830	23340280	451	1010	MALSU1	ENSG00000156928	60.462	30.71	-29.7521	-30.7409	-3.5142	0.0559523
chr16	57822223	57822769	547	-5981	KIFC3	ENSG00000140859	44.5539	66.443	21.8891	72.6383	4.27035	0.0583462	chr7	23720806	23720859	54	1002	FAM221A	ENSG00000188732	48.873	31.6082	-17.2647	-12.2522	-3.01071	0.0569177
chr16	66662038	66662426	389	7961	CMTM4	ENSG00000183723	61.5073	83.677	22.1697	43.471	3.56816	0.0682323	chr7	24614396	24614501	106	763	MPP6	ENSG00000105926	55.8041	32.1121	-23.6921	-24.3907	-3.25216	0.058779
chr16	66989401	66989879	479	-5260	CES3	ENSG00000172828	50.0601	66.892	16.8319	41.4776	3.30325	0.05675	chr7	24797786	24797884	99	-53	DFNA5	ENSG00000105928	59.3734	36.2587	-23.1148	-27.8114	-3.34483	0.0627001
chr16	67336188	67336268	81	-8461	KCTD19	ENSG00000168676	45.3076	62.2346	16.927	12.572	3.26483	0.0515539	chr7	25022066	25022314	249	-812	OSBPL3	ENSG00000070882	53.4537	31.8387	-21.615	-18.5126	-4.24432	0.0555963
chr16	67336693	67336920	228	-8966	KCTD19	ENSG00000168676	55.8293	73.7693	17.94	10.0862	3.54379	0.0515539	chr7	25642543	25642992	450	-374437	NPVF	ENSG00000105954	53.2311	37.8438	-15.3872	-92.3866	-3.09954	0.0581185
chr16	69418512	69418803	292	0	TERF2	ENSG00000132604	36.2824	57.284	21.0015	15.69	4.19324	0.052707	chr7	27137109	27138183	1075	-1493	HOXA1	ENSG00000105991	49.0375	12.6928	-36.3446	-205.465	-3.04516	0.0666681
chr16	69854230	69855069	840	-17570	WWP2	ENSG00000198373	35.4741	55.4712	19.9971	76.712	4.15303	0.0596391	chr7	27148367	27148448	82	5015	HOXA3	ENSG00000105997	78.0113	44.3916	-33.6197	-18.208	-3.01041	0.086272
chr16	70414018	70414104	87	20436	ST3GAL2	ENSG00000157350	17.0536	33.0863	16.0327	13.1215	3.38002	0.0532539	chr7	27201262	27201928	667	3216	HOXA9	ENSG00000078399	78.7634	41.83	-36.9334	-121.383	-3.02134	0.0890263
chr16	71599754	71600371	618	-761	ZNF19	ENSG00000157429	13.311	30.5288	17.2178	22.8554	3.35891	0.0553909	chr7	27264587	27265342	756	-16821	EVX1	ENSG00000106038	53.2459	29.4701	-23.7758	-198.983	-3.02713	0.0596408
chr16	71661267	71662022	756	-950	MARVELD3	ENSG00000140832	46.4083	67.9722	21.5638	72.5612	3.69525	0.05687	chr7	27497433	27497493	61	189881	HIBADH	ENSG00000106049	65.8666	43.8645	-22.0021	-21.586	-3.01319	0.0601835
chr16	71934132	71934854	723	4639	IST1	ENSG00000182149	48.8495	69.1997	20.3502	26.8688	4.18672	0.0533066	chr7	28220843	28221035	193	-480	JAZF1	ENSG00000153814	47.2847	33.191	-14.0938	-9.89638	-3.08343	0.0567421
chr16	72887629	72887825	197	194448	ZFHX3	ENSG00000140836	71.2589	85.4719	14.2131	9.03093	3.01805	0.0527392	chr7	28994644	28995451	808	116009	CPVL	ENSG00000106066	66.3226	44.2326	-22.09	-158.984	-3.06457	0.0654822
chr16	73066990	73067812	823	14461	ZFHX3	ENSG00000140836	57.7061	79.0407	21.3346	71.8847	3.60387	0.0547689	chr7	29389087	29389575	489	-50740	CHN2	ENSG00000106069	55.9475	38.4324	-17.5151	-23.0883	-3.19351	0.0569753
chr16	73094343	73094467	125	-745	ZFHX3	ENSG00000140836	36.5464	58.7732	22.2268	9.03213	3.01866	0.0585271	chr7	29496926	29497450	525	-22035	CHN2	ENSG00000106069	65.8448	48.2326	-17.6122	-47.5509	-3.06837	0.0566403
chr16	75142616	75143026	411	3933	ZNRF1	ENSG00000186187	48.0047	68.8619	20.8572	26.366	3.47508	0.055538	chr7	29825675	29826058	384	-20043	WIPF3	ENSG00000122574	59.8113	42.6539	-17.1574	-21.903	-3.01083	0.0585715
chr16	75561478	75562087	610	3450	CHST5	ENSG00000135702	43.4243	75.2736	31.8494	37.9661	6.96618	0.0550853	chr7	30078628	30079087	460	10326	PLEKHA8	ENSG00000106086	75.2707	52.7579	-22.5128	-40.8624	-3.0728	0.0550098
chr16	79291640	79292295	656	-275900	PIH1	ENSG00000268977	30.6429	52.2296	21.5866	39.4133	3.33787	0.0552714	chr7	30176168	30176462	295	-412	MTURN	ENSG00000180354	67.4375	46.7436	-20.6939	-30.0304	-3.0238	0.0586157
chr16	80785731	80786304	574	51855	CDYL2	ENSG00000166446	64.2825	77.074	12.7915	18.9818	3.22283	0.0515539	chr7	30208706	30209212	507	23192	MTURN	ENSG00000180354	60.9585	40.1241	-20.8343	-43.3383	-3.09525	0.0645446
chr16	81222784	81223052	269	-7849	PKD1L2	ENSG00000166473	35.9124	54.0008	18.0884	27.5843	3.11828	0.0559995	chr7	30855792	30856260	469	-36749	AQP1	ENSG00000240583	75.5765	51.9713	-23.6052	-46.9907	-3.22301	0.0573025
chr16	81652227	81652431	205	-26531	CMIP	ENSG00000153815	58.9263	76.8979	17.9715	25.1408	3.19177	0.0587078	chr7	30891443	30892343	901	-666	AQP1	ENSG00000240583	81.5046	56.5008	-25.0038	-54.7295	-3.04714	0.0551014
chr16	83920809	83921256	448	-11474	MLYCD	ENSG00000103150	23.4317	44.3513	20.9196	31.4442	3.20088	0.0622338	chr7	30926165	30926526	362	-24943	AQP1	ENSG00000240583	58.7906	42.2638	-16.5267	-24.5703	-3.00617	0.0575682
chr16	84233539	84233818	280	8475	ADAD2	ENSG00000140955	40.5299	62.8371	22.3071	25.3573	3.26041	0.0593924	chr7	31093268	31093830	563	1125	ADCYAP1R1	ENSG00000078549	65.3807	28.0919	-37.2888	-59.277	-3.82516	0.0579641
chr16	84603334	84603752	419	-15694	TLDC1	ENSG00000140950	63.174	83.747	20.5731	22.7603	3.46716	0.0580684	chr7	32802378	32802859	482	127905	KBTBD2	ENSG00000170852	80.1564	43.6835	-36.473	-153.795	-3.31814	0.0755979
chr16	84683203	84683580	378	630	KLHL36	ENSG00000135686	38.4898	55.9677	17.4779	29.6161	4.02646	0.051602	chr7	36193743	36194125	383	865	EEPD1	ENSG00000122547	68.9596	46.3696	-22.59	-72.1044	-3.04442	0.0587142
chr16	84753628	84754218	591	19981	USP10	ENSG00000103194	57.7891	77.4106	19.6214	46.764	4.55903	0.0516361	chr7	36320660	36321355	696	-15397	EEPD1	ENSG00000122547	57.6437	27.3216	-30.322	-64.2245	-3.09737	0.0777047
chr16	85123818	85124109	292	11792	KIAA0513	ENSG00000135709	17.9928	35.2965	17.3037	40.869	3.2354	0.0576405	chr7	38217046	38217216	171	-607	STARD3NL	ENSG00000010270	62.768	45.1644	-17.6036	-12.9373	-3.0211	0.0567088
chr16	85183102	85183289	188	-21592	CTC-786C10.1	ENSG00000262601	39.666	61.6391	21.9731	27.5117	3.08647	0.0642471	chr7	38289121	38289889	769	71123	STARD3NL	ENSG00000010270	51.6454	41.4359	-10.2094	-31.856	-3.08058	0.0550098
chr16	85212526	85213335	810	7643	CTC-786C10.1	ENSG00000262601	55.2697	82.475	27.2052	121.482	5.07924	0.0515539	chr7	39170464	39171181	718	45002	POU6F2	ENSG00000106536	53.5867	31.7504	-21.8363	-121.873	-3.63273	0.0619582
chr16	85234772	85235539	768	29889	CTC-786C10.1	ENSG00000262601	50.2439	78.0284	27.7844	72.1846	4.1299	0.0667079	chr7	39794147	39794382	236	130661	RALA	ENSG00000006451	66.4039	48.0492	-18.3547	-9.75072	-3.12374	0.055915
chr16	85254632	85254857	226	49749	CTC-786C10.1	ENSG00000262601	30.7061	59.0509	28.3448	58.2931	3.87807	0.0642358	chr7	40866671	40867686	1016	692051	SUGCT	ENSG00000175600	68.9954	51.1797	-17.8156	-41.439	-3.10026	0.055351
chr16	85283364	85283411	48	78481	CTC-786C10.1	ENSG00000262601	74.8487	91.4345	16.5858	9.03006	3.01231	0.0536043	chr7	42278434	42278840	407	-1775	GLI3	ENSG00000106571	47.2067	27.2617	-19.945	-42.9983	-3.18756	0.0550601
chr16	85392712	85393019	308	1642	RP11-680G10.1	ENSG00000261567	61.8603	87.2268	25.3665	39.1148	3.70783	0.057563	chr7	42760748	42761214	467	190294	C7orf25	ENSG00000136197	60.8114	44.5959	-16.2156	-21.6487	-3.03893	0.0649321
chr16	85404375	85405000	626	13305	RP11-680G10.1	ENSG00000261567	43.7027	73.2416	29.5389	98.8267	4.09924	0.0593565	chr7	42895611	42895730	120	55778	C7orf25	ENSG00000136197	84.605	70.3739	-14.2311	-13.2302	-3.19319	0.0594976
chr16	85415418	85415857	440	24348	RP11-680G10.1	ENSG00000261567	27.9923	49.5498	21.5576	51.3861	3.42537	0.0563836	chr7	42896069	42896157	89	55351	C7orf25	ENSG00000136197	56.5027	43.6669	-12.8358	-9.40956	-3.0105	0.0585053
chr16	85479477	85479686	210	88407	RP11-680G10.1	ENSG00000261567	41.037	62.3085	21.2716	21.3554	3.07642	0.063568	chr7	43289616	43290225	610	137371	HECW1	ENSG00000002746	60.4946	37.4026	-23.092	-36.4336	-3.16501	0.0716122
chr16	85569828	85570149	322	-74865	GSE1	ENSG00000131149	47.7573	68.9184	21.161	35.8815	3.46811	0.0563046	chr7	43574766	43575069	304	-47594	STK17A	ENSG00000164543	77.8485	63.0506	-14.7979	-19.3918	-3.12142	0.0550098
chr16	85578365	85578843	479	-66171	GSE1	ENSG00000131149	52.9077	79.0273	26.1197	75.1728	3.99662	0.0660438	chr7	44162030	44162345	316	-234	POLD2	ENSG00000106628	64.1919	45.8453	-18.3466	-9.44991	-3.05576	0.0557894
chr16	85622391	85622899	509	-22115	GSE1	ENSG00000131149	59.7692	80.6477	20.8785	54.1431	4.3895	0.0516034	chr7	44304843	44304945	103	-22937	CAMK2B	ENSG00000058404	49.6182	29.0794	-20.5388	-9.03111	-3.00159	0.0722291
chr16	85690600	85690690	91	2561	GSE1	ENSG00000131149	59.9651	77.3493	17.3842	12.1467	3.05725	0.0606914	chr7	44333055	44334009	955	29551	CAMK2B	ENSG00000058404	79.4801	53.6527	-25.8273	-71.4111	-3.0385	0.0607841
chr16	85815643	85815790	148	-16448	COX4I1	ENSG00000131143	58.6092	74.214	15.6048	21.3662	3.07203	0.0538535	chr7	44787367	44787496	130	-683	ZMIZ2	ENSG00000122515	45.9862	25.4204	-20.5658	-11.1625	-3.08283	0.0553644
chr16	86140816	86141225	410	192896	IRF8	ENSG00000140968	35.7846	62.0018	26.2172	54.1886	3.25435	0.0642533	chr7	44885585	44885894	310	1725	H2AFV	ENSG00000105968	75.5557	56.1827	-19.373	-12.6934	-3.03368	0.0551252
chr16	86263546	86264164	619	-279968	FOXF1	ENSG00000103241	53.5401	79.1143	25.5742	67.9133	3.59758	0.0764417	chr7	45927617	45927676	60	-279	IGFBP1	ENSG00000146678	69.4059	55.9955	-13.4104	-9.45027	-3.0963	0.055778
chr16	86367271	86368545	1275	-175587	FOXF1	ENSG00000103241	44.5545	72.0529	27.4983	113.241	5.5825	0.0527218	chr7	47534192	47534368	177	-13308	TNS3	ENSG00000136205	78.2906	49.6496	-28.641	-34.3964	-3.3617	0.0714827
chr16	86399552	86400081	530	-144051	FOXF1	ENSG00000103241	39.6141	64.4314	24.8173	50.5318	3.49368	0.0657227	chr7	47597287	47597614	328	-18087	TNS3	ENSG00000136205	89.7949	70.1013	-19.6937	-26.1794	-3.12812	0.059902
chr16	86652468	86652638	171	40352	FOXL1	ENSG00000176678	58.5437	76.092	17.5483	15.209	3.0718	0.0637295	chr7	47614490	47614711	222	6517	TNS3	ENSG00000136205	58.9756	39.2393	-19.7364	-19.0455	-3.08071	0.0626799
chr16	86657921	86658113	193	45805	FOXL1	ENSG00000176678	50.1566	73.9431	23.7865	11.2085	4.15351	0.0611377	chr7	47730863	47731521	659	36020	C7orf65	ENSG00000221845	69.2547	40.0836	-29.1711	-80.3745	-4.11714	0.0555852
chr16	86658560	86659059	500	46444	FOXL1	ENSG00000176678	43.1654	67.7843	24.6189	80.6595	4.53806	0.0610091	chr7	47732023	47732630	608	37180	C7orf65	ENSG00000221845	83.491	60.7245	-22.7665	-67.1012	-3.02151	0.0557656
chr16	86786979	86787277	299	174863	FOXL1	ENSG00000176678	53.6901	77.1534	23.4634	42.2222	3.77477	0.0630605	chr7	55155154	55155548	395	-21867	EGFR	ENSG00000146648	77.3496	49.0554	-28.2942	-26.681	-3.32813	0.0614975
chr16	86853235	86853920	686	241119	FOXL1	ENSG00000176678	32.8361	58.5364	25.7003	25.0306	3.7239	0.0554215	chr7	55198645	55199344	700	21104	EGFR	ENSG00000146648	69.8859	39.2752	-30.6106	-49.2052	-3.03485	0.0663309
chr16	86962421	86963386	966	350305	FOXL1	ENSG00000176678	45.6838	76.0798	30.3961	195.175	4.65152	0.0624069	chr7	55446551	55446563	13	13409	LANCL2	ENSG00000132434	87.9624	68.9497	-19.0128	-9.0998	-3.02038	0.0556432
chr16	87231889	87232919	1031	118066	C16orf95	ENSG00000260456	35.1667	68.5615	33.3947	121.407	6.4118	0.0533873	chr7	63642990	63643090	101	-45761	ZNF679	ENSG00000197123	46.4688	32.4658	-14.003	-21.0838	-3.00185	0.0550098
chr16	87385198	87385629	432	-17318	RP11-178L8.4	ENSG00000131152	50.4206	69.8314	19.4108	70.6863	3.54337	0.0569725	chr7	64362936	64363139	204	-485	ZNF273	ENSG00000198039	56.8732	34.2639	-22.6093	-36.3691	-3.75566	0.0550098
chr16	87490666	87490702	37	-23925	ZCCHC14	ENSG00000140948	49.8187	65.0997	15.281	9.27584	3.11999	0.0536164	chr7	65508631	65508726	96	-32058	ASL	ENSG00000126522	49.6952	33.1038	-16.5914	-18.5892	-3.0018	0.055524
chr16	87580848	87581007	160	-55196	ZCCHC14	ENSG00000140948	35.7329	54.9691	19.2362	27.6359	3.08951	0.0592033	chr7	65611734	65612056	323	20110	CRCP	ENSG00000241258	72.7562	47.7798	-24.9764	-15.7332	-3.00701	0.0692171
chr16	87739377	87739760	384	-86	FLJ00104	ENSG00000205047	57.5659	74.5223	16.9565	85.8414	3.49613	0.0520757	chr7	66213078	66214009	932	-6866	RABGEF1	ENSG00000154710	55.3911	33.6278	-21.7634	-44.3926	-3.04701	0.0592416
chr16	87824711	87825202	492	-25128	KLHDC4	ENSG00000104731	45.7275	71.9969	26.2694	82.4616	3.71918	0.0792016	chr7	66421913	66421957	45	26301	TMEM248	ENSG00000106609	85.446	64.152	-21.294	-10.0393	-3.14206	0.0555071
chr16	87839730	87840081	352	-40147	KLHDC4	ENSG00000104731	27.6806	45.2923	17.6118	50.3835	3.73476	0.0527027	chr7	66422307	66423132	826	26695	TMEM248	ENSG00000106609	83.0751	53.2139	-29.8612	-73.3869	-3.07774	0.0555071
chr16	87994303	87994692	390	825	BANP	ENSG00000172530	62.2639	82.0567	19.7928	27.2077	3.5971	0.0575545	chr7	68000231	68000304	74	-1063600	AUTS2	ENSG00000158321	59.0687	38.8043	-20.2644	-21.3011	-3.02691	0.0741425
chr16	88048294	88048390	97	44669	BANP	ENSG00000172530	25.5001	43.5326	18.0325	12.1412	3.05011	0.05675	chr7	70200242	70200811	570	6116	AUTS2	ENSG00000158321	73.7394	42.647	-31.0924	-58.7173	-3.57731	0.0735582
chr16	88154856	88155184	329	151231	BANP	ENSG00000172530	57.9713	79.4137	21.4424	52.7694	3.92642	0.0531114	chr7	72044762	72045728	967	-132625	CALN1	ENSG00000183166	73.6157	40.731	-32.8847	-67.2069	-3.94574	0.0554244
chr16	88177086	88177152	67	173461	BANP	ENSG00000172530	38.1005	60.8034	22.703	9.23526	3.12551	0.0595166	chr7	73002327	73002601	275	-9205	TBL2	ENSG00000106638	46.5596	25.0372	-21.5223	-45.5567	-3.07143	0.0665807
chr16	88329438	88329930	493	-163948	ZNF469	ENSG00000225614	62.5801	84.4934	21.9133	72.6337	4.29564	0.0555172	chr7	73507086	73507460	375	0	LIMK1	ENSG00000106683	66.2485	40.2575	-25.991	-47.0451	-3.03021	0.0743161
chr16	88527855	88528570	716	8129	ZFPM1	ENSG00000179588	47.7739	72.4415	24.6677	95.4843	4.9393	0.0515539	chr7	73602823	73603287	465	-10694	LAT2	ENSG00000086730	68.6459	44.4463	-24.1996	-15.71	-3.03165	0.0653084
chr16	88554471	88555157	687	34745	ZFPM1	ENSG00000179588	64.7129	91.4858	26.7729	198.27	5.42459	0.0515539	chr7	73686290	73686609	320	-17195	CLIP2	ENSG00000106665	47.5466	25.7067	-21.8399	-36.2312	-3.12036	0.0662344
chr16	88582781	88583414	634	-53374	ZC3H18	ENSG00000158545	53.4999	79.9486	26.4486	114.674	4.25769	0.065762	chr7	73708223	73709189	967	4417	CLIP2	ENSG00000106665	56.1912	25.9929	-30.1983	-99.4443	-3.00343	0.0698602
chr16	88679866	88680623	758	-9827	ZC3H18	ENSG00000158545	63.8617	86.2633	22.4015	82.8038	5.17434	0.0515539	chr7	74069724	74070303	580	-1707	GTF2I	ENSG00000077809	70.1989	34.3512	-35.8477	-95.7867	-3.01418	0.0754354
chr16	88821776	88822047	272	-29023	PIEZO1	ENSG00000103335	44.9937	62.9224	17.9286	41.8139	3.29107	0.0517349	chr7	75194262	75194836	575	46324	HIP1	ENSG00000127946	80.4279	60.4184	-20.0095	-26.4259	-3.10733	0.0550098
chr16	88836639	88836922	284	14696	PIEZO1	ENSG00000103335	33.9128	57.7472	23.8344	51.4025	3.64834	0.0641383	chr7	75369362	75369465	104	-1096	HIP1	ENSG00000127946	52.6897	32.8275	-19.8622	-22.0655	-3.18297	0.0561755
chr16	88840106	88840798	693	10820	PIEZO1	ENSG00000103335	29.059	50.4308	21.3718	84.8458	3.90719	0.0584443	chr7	75519505	75519690	186	8142	RHBDD2	ENSG00000005486	85.4665	63.8313	-21.6352	-24.8349	-3.00965	0.0668289
chr16	88966506	88967608	1103	1314	CBFA2T3	ENSG00000129993	39.0779	72.3197	33.2418	223.238	5.22267	0.0752434	chr7	75592026	75592728	703	-4432	POR	ENSG00000127948	62.3002	26.6488	-35.6514	-64.0786	-3.0704	0.0813506
chr16	89118588	89119807	1220	-34975	ACSF3	ENSG00000176715	33.817	62.2672	28.4502	318.537	4.85608	0.067481	chr7	75683497	75683783	287	6017	MDH2	ENSG00000146701	61.9326	36.3357	-25.5969	-21.7431	-3.23792	0.0617352
chr16	89150862	89151119	258	-3663	ACSF3	ENSG00000176715	18.189	35.8835	17.6945	28.5754	3.34118	0.0577945	chr7	75684189	75684733	545	6709	MDH2	ENSG00000146701	78.8904	50.6519	-28.2385	-72.8032	-3.07637	0.0617352
chr16	89246566	89247009	444	8390	CDH15	ENSG00000129910	44.656	64.6128	19.9569	80.5734	4.09953	0.0547801	chr7	75795555	75795767	213	-35448	SRRM3	ENSG00000177679	61.7449	40.0224	-21.7225	-39.3718	-3.10714	0.0578757
chr16	89366836	89367149	314	-11749	ANKRD11	ENSG00000167522	40.8646	58.2846	17.42	34.9228	3.28114	0.065108	chr7	77328228	77328318	91	1759	RSBN1L	ENSG00000187257	62.4049	35.2012	-27.2037	-12.5016	-4.00634	0.0584736
chr16	89430795	89431406	612	-35400	ANKRD11	ENSG00000167522	15.5097	30.3022	14.7925	42.3801	3.57055	0.0580716	chr7	77388610	77388894	285	-17	RSBN1L	ENSG00000187257	68.5292	49.1657	-19.3635	-12.5709	-3.08929	0.0555928
chr16	89675808	89675939	132	-3776	DPEP1	ENSG00000015413	47.1364	63.0565	15.9201	27.613	3.0987	0.0557503	chr7	77426380	77426793	414	1103	TMEM60	ENSG00000135211	55.658	29.7985	-25.8595	-33.0041	-3.21039	0.0608089
chr17	406380	406912	533	-110649	FAM101B	ENSG00000183688	56.5685	74.4834	17.9149	65.6016	4.19359	0.0530052	chr7	80665198	80665625	428	-113522	SEMA3C	ENSG00000075223	66.1896	45.4754	-20.7141	-30.4782	-3.57725	0.0558063
chr17	576564	577535	972	40413	VPS53	ENSG00000141252	39.0623	63.2201	24.1578	85.9655	4.47673	0.0638408	chr7	82071071	82071302	232	1728	CACNA2D1	ENSG00000153956	59.3632	39.0791	-20.284	-11.567	-3.64145	0.0557642
chr17	634737	634860	124	-791	FAM57A	ENSG00000167695	39.9068	58.2447	18.3379	12.281	3.11976	0.0597368	chr7	87103929	87104561	633	219	ABCB4	ENSG00000005471	34.7835	13.3048	-21.4786	-61.994	-3.14426	0.0551274
chr17	659376	659617	242	-2136	GEMIN4	ENSG00000179409	57.5317	74.8656	17.3339	28.9501	3.28843	0.0612972	chr7	87256534	87256748	215	-980	RUNDC3B	ENSG00000105784	61.9544	45.6805	-16.2739	-13.9004	-3.17047	0.0550376
chr17	767980	768142	163	-628	NXN	ENSG00000167693	32.5336	46.5907	14.0571	12.9667	3.33226	0.0534834	chr7	87564943	87565061	119	871	ADAM22	ENSG00000008277	51.5209	34.3581	-17.1628	-10.3614	-3.26037	0.0585057
chr17	821198	821606	409	8325	RP11-676J12.7	ENSG00000262003	29.9705	47.6739	17.7034	43.1903	3.60502	0.0616681	chr7	89783003	89783149	147	-539	STEAP1	ENSG00000164647	72.8286	50.7201	-22.1085	-28.3014	-3.00534	0.0684508
chr17	868439	869152	714	13857	NXN	ENSG00000167693	35.9761	59.7146	23.7384	71.4286	4.74044	0.0651436	chr7	89840271	89840433	163	-566	STEAP2	ENSG00000157214	55.2612	29.6987	-25.5625	-27.8948	-3.72461	0.0662688
[truncated: 3,191 more rows]
