# Supplementary material for: Enduring epigenetic landmarks define the cancer microenvironment
Source: HighWire-hosted journal article supplement (doi:10.1101/gr.229070.117), 2018-04-12
Supplement: Supplemental_Table_S3.xlsx [file Supplemental_Table_S3.xlsx]

## Sheet: Supplemental Table S3
Supplemental Table S3: Differentially methylated regions associated with differentially expressed protein-coding genes
# DMRs where the nearest protein-coding gene is differntially expressed between CAFs and NPFs (RNA-seq P<0.05, absolute log fold change >0.58 (i.e absolute fold change of ≥1.5))
1 For the distance of DMRs to the TSS, positive values indicate that the DMR lies downstream of the TSS, while negative values indicate that the DMR lies upstream of the TSS.
2 The percentage difference in DNA methylation and the fold change in RNA expression are relative to NPFs.
Hypermethylated DE-DMRs in CAFs versus NPFs												Hypomethylated DE-DMRs in CAFs versus NPFs
Chromosome	DMR start	DMR end	Mean % methylation difference 2	Gene name	Gene ID	Distance to TSS 1	RNA-seq logFC 2	RNA-seq logCPM	RNA-seq P Value	RNA-seq FDR		Chromosome	DMR start	DMR end	Mean % methylation difference 2	Gene name	Gene ID	Distance to TSS 1	RNA-seq logFC 2	RNA-seq logCPM	RNA-seq P Value	RNA-seq FDR
chr1	4713389	4713601	17.265	AJAP1	ENSG00000196581	-1190	-2.13907	1.77398	0.0232548	0.841709		chr1	4793436	4793747	-26.8736	AJAP1	ENSG00000196581	78330	-2.13907	1.77398	0.0232548	0.841709
chr1	15312359	15312632	32.6628	KAZN	ENSG00000189337	39943	2.267	1.69009	0.000203138	0.0356846		chr1	14609005	14609119	-14.4497	RP11-344F13.1	ENSG00000189337	-316080	2.267	1.69009	0.000203138	0.0356846
chr1	47915053	47915410	21.6561	FOXD2	ENSG00000186564	13363	2.18313	0.577892	0.00226131	0.208341		chr1	14926937	14927342	-23.0698	KAZN	ENSG00000189337	1723	2.267	1.69009	0.000203138	0.0356846
chr1	85245323	85245637	18.7388	LPAR3	ENSG00000171517	86204	-2.34075	5.50453	5.68636e-06	0.00187294		chr1	15016566	15016992	-20.6711	TBCAP2	ENSG00000189337	91352	2.267	1.69009	0.000203138	0.0356846
chr1	120255834	120256272	23.915	PHGDH	ENSG00000092621	1323	0.799188	6.03057	0.0222842	0.81781		chr1	15269367	15269987	-15.0901	KAZN	ENSG00000189337	-2427	2.267	1.69009	0.000203138	0.0356846
chr1	120256620	120256898	20.3717	PHGDH	ENSG00000092621	2109	0.799188	6.03057	0.0222842	0.81781		chr1	15294958	15295343	-11.6768	KAZN	ENSG00000189337	22542	2.267	1.69009	0.000203138	0.0356846
chr1	209881724	209882348	18.9844	HSD11B1	ENSG00000117594	3532	-2.1912	6.36192	0.00706782	0.411488		chr1	21856050	21857219	-17.6822	ALPL	ENSG00000162551	20184	3.10622	3.76533	2.82257e-06	0.00109375
chr1	236094014	236094836	20.5274	LYST	ENSG00000143669	-47141	-1.03743	6.28233	0.00299994	0.245492		chr1	21879879	21880371	-15.0471	ALPL	ENSG00000162551	-203	3.10622	3.76533	2.82257e-06	0.00109375
chr1	245679306	245679961	22.803	KIF26B	ENSG00000162849	5001	1.52118	7.01098	0.0203342	0.774171		chr1	21894079	21894730	-16.4014	ALPL	ENSG00000162551	-2065	3.10622	3.76533	2.82257e-06	0.00109375
chr1	245727520	245728032	19.6496	KIF26B	ENSG00000162849	53215	1.52118	7.01098	0.0203342	0.774171		chr1	25945029	25945113	-19.053	MAN1C1	ENSG00000117643	687	2.4244	4.60699	0.00177461	0.178477
chr1	245753710	245754144	31.1655	KIF26B	ENSG00000162849	79405	1.52118	7.01098	0.0203342	0.774171		chr1	26037372	26037465	-22.1439	MAN1C1	ENSG00000117643	1278	2.4244	4.60699	0.00177461	0.178477
chr1	245761799	245761972	20.2686	KIF26B	ENSG00000162849	87494	1.52118	7.01098	0.0203342	0.774171		chr1	26037792	26038681	-26.2812	MAN1C1	ENSG00000117643	1698	2.4244	4.60699	0.00177461	0.178477
chr1	245847940	245848211	19.9655	KIF26B	ENSG00000162849	173635	1.52118	7.01098	0.0203342	0.774171		chr1	32055010	32055287	-25.7891	TINAGL1	ENSG00000142910	12870	3.29757	4.15218	0.0116129	0.554348
chr2	133404074	133404494	23.2831	LYPD1	ENSG00000150551	23283	1.34454	5.23384	0.0203899	0.774171		chr1	47901721	47902085	-22.9936	FOXD2	ENSG00000186564	31	2.18313	0.577892	0.00226131	0.208341
chr2	176997707	176998053	26.1043	HOXD8	ENSG00000175879	2621	5.16686	0.677632	5.98143e-12	3.94027e-08		chr1	47904985	47905871	-33.0164	FOXD2	ENSG00000186564	3295	2.18313	0.577892	0.00226131	0.208341
chr2	202673710	202674741	23.5741	CDK15	ENSG00000138395	2321	-1.73001	4.58831	0.000650445	0.0892668		chr1	47998166	47998708	-22.7269	ATP6V0E1P4	ENSG00000186564	96476	2.18313	0.577892	0.00226131	0.208341
chr3	74661182	74661992	25.8048	CNTN3	ENSG00000113805	-90890	-1.40185	3.75569	0.0012449	0.141393		chr1	48021969	48022552	-13.1179	ATP6V0E1P4	ENSG00000186564	120279	2.18313	0.577892	0.00226131	0.208341
chr3	171175707	171176032	25.186	TNIK	ENSG00000154310	1819	-1.00865	5.75188	0.0118462	0.561414		chr1	85247753	85248109	-18.4034	AC104169.1	ENSG00000171517	83732	-2.34075	5.50453	5.68636e-06	0.00187294
chr4	3955312	3955345	18.434	ADRA2C	ENSG00000184160	187186	3.12942	2.34238	0.0305165	0.957275		chr1	85360143	85360587	-25.4475	LPAR3	ENSG00000171517	-1246	-2.34075	5.50453	5.68636e-06	0.00187294
chr4	4341177	4341529	17.7623	NSG1	ENSG00000168824	-8337	2.03349	1.36199	0.00941833	0.481938		chr1	109791666	109791741	-16.7345	CELSR2	ENSG00000143126	-899	1.584	1.09891	0.00912718	0.473764
chr4	101112553	101112735	19.5699	DDIT4L	ENSG00000145358	-613	-1.64609	3.13248	0.00409822	0.299967		chr1	161992620	161993058	-23.6077	OLFML2B	ENSG00000162745	371	0.883781	4.71152	0.0379063	0.999905
chr4	119199322	119199384	20.5453	PRSS12	ENSG00000164099	74773	0.826303	6.7171	0.0279568	0.928248		chr1	210426022	210426559	-32.7264	ST13P19	ENSG00000082497	19877	2.22591	4.13225	0.0110642	0.54392
chr4	183060379	183061184	29.9121	TENM3	ENSG00000218336	-4658	-2.45432	2.69149	0.000600587	0.0850831		chr1	240735365	240735788	-19.6721	RP11-467I20.6	ENSG00000180875	39660	-1.38475	5.58359	0.0151866	0.649923
chr4	183167363	183168463	26.4031	TENM3	ENSG00000218336	2780	-2.45432	2.69149	0.000600587	0.0850831		chr1	240736458	240736589	-19.6178	RP11-467I20.6	ENSG00000180875	38859	-1.38475	5.58359	0.0151866	0.649923
chr4	183371503	183371602	13.1039	TENM3	ENSG00000218336	1350	-2.45432	2.69149	0.000600587	0.0850831		chr1	245629269	245629824	-20.5891	KIF26B	ENSG00000162849	-44479	1.52118	7.01098	0.0203342	0.774171
chr4	187878212	187878733	36.6876	FAT1	ENSG00000083857	-230335	1.83256	9.53615	0.000125977	0.0260187		chr1	245778054	245778694	-27.2592	RP11-522M21.2	ENSG00000162849	103749	1.52118	7.01098	0.0203342	0.774171
chr5	1007805	1008134	24.2516	NKD2	ENSG00000145506	-809	-3.51253	1.56497	1.29527e-06	0.000656353		chr1	245837056	245837098	-24.2868	RP11-522M21.3	ENSG00000162849	162751	1.52118	7.01098	0.0203342	0.774171
chr5	168728833	168728965	20.4509	SLIT3	ENSG00000184347	-699	2.38444	2.82772	0.0208165	0.785836		chr2	30456376	30456586	-33.2379	LBH	ENSG00000213626	1329	2.83384	4.68115	0.000138132	0.0275741
chr6	11213987	11214942	19.0054	NEDD9	ENSG00000111859	17948	2.2177	3.83763	0.0384555	0.999905		chr2	30457078	30457233	-25.1213	LBH	ENSG00000213626	2031	2.83384	4.68115	0.000138132	0.0275741
chr6	11269896	11271460	22.0971	NEDD9	ENSG00000111859	-36980	2.2177	3.83763	0.0384555	0.999905		chr2	36934440	36935160	-23.5789	VIT	ENSG00000205221	10419	2.43348	3.26964	3.09131e-06	0.00116366
chr6	43045360	43045686	21.078	PTK7	ENSG00000112655	807	0.630114	6.5721	0.0499311	0.999905		chr2	38264690	38265178	-15.1818	RMDN2-AS1	ENSG00000138061	38039	1.75511	7.37657	0.00475556	0.325818
chr6	43060799	43060985	22.0186	PTK7	ENSG00000112655	16246	0.630114	6.5721	0.0499311	0.999905		chr2	38304718	38305157	-34.6424	CYP1B1-AS1	ENSG00000138061	-1394	1.75511	7.37657	0.00475556	0.325818
chr6	43097105	43097250	25.3195	PTK7	ENSG00000112655	-1078	0.630114	6.5721	0.0499311	0.999905		chr2	38319313	38320028	-26.0974	CYP1B1-AS1	ENSG00000138061	-15989	1.75511	7.37657	0.00475556	0.325818
chr6	55736192	55736459	47.3157	BMP5	ENSG00000112175	3217	-3.90368	2.18314	4.18249e-05	0.010597		chr2	65177159	65177201	-15.7857	AC007386.3	ENSG00000115902	-38422	1.10793	5.3054	0.00886837	0.463654
chr6	55737497	55737884	48.4642	BMP5	ENSG00000112175	1792	-3.90368	2.18314	4.18249e-05	0.010597		chr2	65177634	65178152	-25.5427	AC007386.3	ENSG00000115902	-37471	1.10793	5.3054	0.00886837	0.463654
chr6	55739268	55739533	41.7534	BMP5	ENSG00000112175	143	-3.90368	2.18314	4.18249e-05	0.010597		chr2	65178463	65178756	-17.3319	AC007386.3	ENSG00000115902	-36867	1.10793	5.3054	0.00886837	0.463654
chr6	133892024	133892094	18.5147	EYA4	ENSG00000112319	296104	-1.00378	6.58314	0.0337585	0.999905		chr2	65217528	65217783	-21.813	SLC1A4	ENSG00000115902	992	1.10793	5.3054	0.00886837	0.463654
chr6	152004146	152004338	32.0065	ESR1	ENSG00000091831	-7292	2.30021	0.832354	0.000200911	0.0356846		chr2	74780021	74780848	-21.9115	LOXL3	ENSG00000115318	0	1.41116	5.34539	0.00021222	0.0367895
chr6	169593729	169593953	19.2739	THBS2	ENSG00000186340	58292	1.65697	9.16276	0.0350115	0.999905		chr2	74782647	74782845	-18.082	LOXL3	ENSG00000115318	0	1.41116	5.34539	0.00021222	0.0367895
chr7	32109831	32109917	11.3873	PDE1C	ENSG00000154678	543	-1.04487	6.02643	0.0115103	0.553459		chr2	105997200	105998955	-39.6282	AC012360.6	ENSG00000115641	14286	0.875124	7.98857	0.0262258	0.899806
chr7	69336331	69337260	32.2809	AUTS2	ENSG00000158321	271733	1.29147	1.66979	0.0418204	0.999905		chr2	106013724	106014145	-45.1401	FHL2	ENSG00000115641	-309	0.875124	7.98857	0.0262258	0.899806
chr7	70169242	70170902	26.8127	AUTS2	ENSG00000158321	-23222	1.29147	1.66979	0.0418204	0.999905		chr2	106072185	106072705	-18.7574	FHL2	ENSG00000115641	-17214	0.875124	7.98857	0.0262258	0.899806
chr7	108089540	108089963	19.721	NRCAM	ENSG00000091129	6801	1.83178	0.920336	0.00210384	0.199454		chr2	106103439	106104292	-15.6471	FHL2	ENSG00000115641	-48468	0.875124	7.98857	0.0262258	0.899806
chr7	142553466	142553883	18.5334	EPHB6	ENSG00000106123	642	-2.85898	3.41882	1.39773e-06	0.00068204		chr2	133428917	133429299	-21.6134	LYPD1	ENSG00000150551	0	1.34454	5.23384	0.0203899	0.774171
chr8	12899045	12899588	24.6768	DLC1	ENSG00000164741	74164	0.949668	7.86816	0.00548068	0.355704		chr2	157176038	157176637	-27.4826	NR4A2	ENSG00000153234	9995	-1.75207	5.63266	0.00280494	0.237741
chr8	17644341	17645191	18.3703	MTUS1	ENSG00000129422	12985	1.0614	5.36299	0.00201732	0.198345		chr2	165696688	165697211	-22.9599	AC019181.2	ENSG00000082438	519	1.60085	4.80135	0.0313308	0.973545
chr8	19327162	19327515	22.5931	CSGALNACT1	ENSG00000147408	131860	1.62868	4.19706	0.012182	0.562443		chr2	169386493	169387427	-23.261	MIR4774	ENSG00000172292	73733	1.22633	4.68707	0.00345994	0.274607
chr8	19465423	19466122	28.8059	CSGALNACT1	ENSG00000147408	-5416	1.62868	4.19706	0.012182	0.562443		chr2	197789516	197790012	-30.7954	PGAP1	ENSG00000197121	1441	0.821491	5.23888	0.0142514	0.623794
chr8	27503543	27504573	21.1098	SCARA3	ENSG00000168077	11844	-0.945764	4.95912	0.0492863	0.999905		chr2	197792757	197793063	-25.2175	PGAP1	ENSG00000197121	-237	0.821491	5.23888	0.0142514	0.623794
chr8	27527393	27527865	23.1514	SCARA3	ENSG00000168077	35694	-0.945764	4.95912	0.0492863	0.999905		chr2	205427169	205428052	-21.5533	PARD3B	ENSG00000116117	16445	1.10856	6.4445	0.00795104	0.442045
chr8	32404092	32404454	25.262	NRG1	ENSG00000157168	-1273	-2.11783	6.74584	0.00687703	0.404486		chr2	217500323	217502445	-38.8512	IGFBP2	ENSG00000115457	2204	2.97118	6.05834	9.08411e-09	1.70976e-05
chr8	32624435	32624547	14.2991	NRG1	ENSG00000157168	45071	-2.11783	6.74584	0.00687703	0.404486		chr2	218821788	218822047	-26.7944	TNS1	ENSG00000079308	-12936	1.22357	6.81441	0.00057909	0.0829295
chr8	42154942	42155028	20.4144	IKBKB	ENSG00000104365	25351	-0.714583	5.77198	0.0321135	0.98854		chr2	218830862	218831403	-25.4437	AC010136.2	ENSG00000079308	12253	1.22357	6.81441	0.00057909	0.0829295
chr8	74004343	74004855	20.5865	SBSPON	ENSG00000164764	651	-3.43621	4.923	0.0225988	0.827053		chr2	223917460	223918295	-52.802	KCNE4	ENSG00000152049	597	2.64681	4.29359	1.61482e-08	2.12752e-05
chr8	80678683	80679168	28.9406	HEY1	ENSG00000164683	0	1.50071	2.28968	0.034831	0.999905		chr2	223920391	223922707	-35.6921	KCNE4	ENSG00000152049	3528	2.64681	4.29359	1.61482e-08	2.12752e-05
chr8	80698803	80698858	21.4561	HEY1	ENSG00000164683	-18704	1.50071	2.28968	0.034831	0.999905		chr2	238383016	238383492	-31.1562	MLPH	ENSG00000115648	-10578	-1.1961	3.70536	0.0112991	0.552265
chr8	80792456	80793252	27.4464	HEY1	ENSG00000164683	-112357	1.50071	2.28968	0.034831	0.999905		chr2	238777292	238777814	-27.3967	SNORD39	ENSG00000132329	8672	1.43884	3.09023	0.0350672	0.999905
chr8	89311387	89311738	19.1455	MMP16	ENSG00000156103	27978	-1.3908	4.64717	0.000834432	0.107648		chr2	238782059	238782466	-20.5763	SNORD39	ENSG00000132329	13439	1.43884	3.09023	0.0350672	0.999905
chr8	89312611	89313017	23.5017	MMP16	ENSG00000156103	26699	-1.3908	4.64717	0.000834432	0.107648		chr3	5019017	5019144	-21.7362	BHLHE40	ENSG00000134107	-1656	0.714073	6.6388	0.0470229	0.999905
chr8	97161322	97162149	41.2944	GDF6	ENSG00000156466	10870	2.5745	4.9357	8.30481e-06	0.00266868		chr3	5025415	5026043	-27.1608	BHLHE40	ENSG00000134107	4613	0.714073	6.6388	0.0470229	0.999905
chr8	97165566	97166546	35.3369	GDF6	ENSG00000156466	6473	2.5745	4.9357	8.30481e-06	0.00266868		chr3	15310604	15312038	-38.8314	SH3BP5	ENSG00000131370	5377	1.69341	4.86036	0.00209055	0.199454
chr8	97167062	97167205	29.2588	GDF6	ENSG00000156466	5814	2.5745	4.9357	8.30481e-06	0.00266868		chr3	15371359	15372114	-39.3841	SH3BP5	ENSG00000131370	1952	1.69341	4.86036	0.00209055	0.199454
chr8	97167500	97168493	39.6808	GDF6	ENSG00000156466	4526	2.5745	4.9357	8.30481e-06	0.00266868		chr3	49237049	49237672	-28.2686	CCDC36	ENSG00000173421	105	1.60491	1.64183	0.0178086	0.721253
chr8	97169174	97169371	33.6448	GDF6	ENSG00000156466	3648	2.5745	4.9357	8.30481e-06	0.00266868		chr3	57144890	57145175	-26.2425	RP11-157F20.1	ENSG00000144730	31343	1.98663	2.58415	0.00750448	0.424341
chr8	106333499	106333653	27.2584	ZFPM2	ENSG00000169946	1727	1.62559	4.01686	0.0185114	0.735264		chr3	57164654	57165022	-25.2602	RP11-157F20.1	ENSG00000144730	11496	1.98663	2.58415	0.00750448	0.424341
chr9	14321190	14321346	25.3707	NFIB	ENSG00000147862	990	1.71421	4.52921	0.00429307	0.309077		chr3	57184896	57185192	-28.2944	IL17RD	ENSG00000144730	-8361	1.98663	2.58415	0.00750448	0.424341
chr9	14351960	14352713	23.2812	NFIB	ENSG00000147862	-29622	1.71421	4.52921	0.00429307	0.309077		chr3	57186001	57186420	-27.9207	IL17RD	ENSG00000144730	-9466	1.98663	2.58415	0.00750448	0.424341
chr9	71726801	71727031	27.2242	TJP2	ENSG00000119139	-9192	-0.924524	5.51594	0.0152923	0.649923		chr3	57197870	57198069	-23.2581	IL17RD	ENSG00000144730	1333	1.98663	2.58415	0.00750448	0.424341
chr9	71739898	71739978	26.7217	TJP2	ENSG00000119139	3673	-0.924524	5.51594	0.0152923	0.649923		chr3	71803952	71804304	-21.809	EIF4E3	ENSG00000163412	-27	1.07025	3.37827	0.0453429	0.999905
chr9	80270959	80271088	18.5383	GNA14	ENSG00000156049	-7735	1.91553	1.44186	0.0254814	0.883353		chr3	171579725	171581608	-25.4884	TMEM212	ENSG00000186329	18418	-1.29825	0.991456	0.038315	0.999905
chr9	80986992	80987074	15.2503	PSAT1	ENSG00000135069	74932	1.08434	6.92198	0.0195757	0.756333		chr3	171581981	171582087	-22.9846	TMEM212	ENSG00000186329	20674	-1.29825	0.991456	0.038315	0.999905
chr9	94649670	94650112	13.3974	ROR2	ENSG00000169071	61049	-1.08342	3.8649	0.0462938	0.999905		chr3	184300073	184300870	-25.8993	EPHB3	ENSG00000182580	20500	1.42263	1.91686	0.04981	0.999905
chr9	94668390	94668779	20.0987	ROR2	ENSG00000169071	42382	-1.08342	3.8649	0.0462938	0.999905		chr3	184869019	184869592	-23.4312	C3orf70	ENSG00000187068	1209	2.82826	2.83804	1.47071e-07	0.000129177
chr9	101369505	101369654	16.6577	GABBR2	ENSG00000136928	101824	-3.44274	5.35441	0.0327183	0.999905		chr3	184871381	184871649	-16.3929	C3orf70	ENSG00000187068	-578	2.82826	2.83804	1.47071e-07	0.000129177
chr9	101370111	101370723	18.9431	GABBR2	ENSG00000136928	100755	-3.44274	5.35441	0.0327183	0.999905		chr4	3786404	3786719	-18.8831	ADRA2C	ENSG00000184160	18278	3.12942	2.34238	0.0305165	0.957275
chr10	50325344	50325906	23.5321	VSTM4	ENSG00000165633	-1789	1.36832	4.08483	0.0197473	0.758517		chr4	4389993	4390637	-28.2552	NSG1	ENSG00000168824	1160	2.03349	1.36199	0.00941833	0.481938
chr10	77155990	77156551	43.0766	ZNF503	ENSG00000165655	5038	-0.87488	3.8793	0.0407933	0.999905		chr4	8184708	8185420	-20.7112	SH3TC1	ENSG00000125089	905	1.56265	1.19687	0.0048141	0.325818
chr10	77157345	77157840	35.2845	ZNF503	ENSG00000165655	3749	-0.87488	3.8793	0.0407933	0.999905		chr4	8186987	8187922	-17.5018	SH3TC1	ENSG00000125089	3184	1.56265	1.19687	0.0048141	0.325818
chr10	95723024	95723714	27.5181	PLCE1	ENSG00000138193	-30031	1.42154	2.59897	0.00864331	0.455502		chr4	8193165	8193236	-18.2577	SH3TC1	ENSG00000125089	-7854	1.56265	1.19687	0.0048141	0.325818
chr10	105536495	105537126	22.9947	SH3PXD2A	ENSG00000107957	23928	0.852367	7.57893	0.0241212	0.858912		chr4	30724711	30726305	-26.7518	PCDH7	ENSG00000169851	733	3.4755	6.00975	0.0012096	0.139107
chr11	78649972	78650832	24.8533	TENM4	ENSG00000149256	-35040	-1.04628	5.13347	0.0120608	0.562443		chr4	89080382	89080517	-23.1177	ABCG2	ENSG00000118777	0	-2.13684	3.51597	0.000554704	0.0819751
chr11	130337799	130338051	19.3608	ADAMTS15	ENSG00000166106	18929	1.32838	3.16245	0.0311181	0.969221		chr4	111532882	111533346	-10.8104	RP11-380D23.2	ENSG00000164093	10860	-3.41138	1.06505	0.00795178	0.442045
chr11	130358409	130359188	24.1758	ADAMTS15	ENSG00000166106	39539	1.32838	3.16245	0.0311181	0.969221		chr4	111539931	111540457	-63.9728	PITX2	ENSG00000164093	3749	-3.41138	1.06505	0.00795178	0.442045
chr12	2339384	2339469	16.5121	CACNA1C	ENSG00000151067	176654	1.10936	5.59768	0.00421847	0.305474		chr4	111554122	111554831	-61.6678	PITX2	ENSG00000164093	3344	-3.41138	1.06505	0.00795178	0.442045
chr12	6290914	6291474	18.5151	CD9	ENSG00000010278	-17406	-0.680192	7.27305	0.0372575	0.999905		chr4	111559219	111560202	-61.192	PITX2	ENSG00000164093	-710	-3.41138	1.06505	0.00795178	0.442045
chr12	20508169	20508335	33.9016	PDE3A	ENSG00000172572	-13843	5.41218	4.6738	5.86486e-09	1.39301e-05		chr4	156679488	156680120	-17.0836	GUCY1B3	ENSG00000061918	-23	4.2693	4.6775	3.33383e-16	4.39233e-12
chr12	27531878	27532701	19.054	ARNTL2	ENSG00000029153	10608	-0.835705	5.5887	0.0200023	0.763856		chr4	156681360	156681694	-13.297	GUCY1B3	ENSG00000061918	748	4.2693	4.6775	3.33383e-16	4.39233e-12
chr12	28124665	28124931	30.3166	PTHLH	ENSG00000087494	0	3.57185	4.12816	1.39071e-10	4.58065e-07		chr4	182200329	182200809	-14.7999	RP11-665C14.2	ENSG00000218336	-865033	-2.45432	2.69149	0.000600587	0.0850831
chr12	106480366	106481167	24.0378	NUAK1	ENSG00000074590	0	1.30947	6.42306	0.00642731	0.384676		chr4	187643746	187643877	-11.3855	FAT1	ENSG00000083857	1131	1.83256	9.53615	0.000125977	0.0260187
chr12	106481558	106481834	25.0963	NUAK1	ENSG00000074590	823	1.30947	6.42306	0.00642731	0.384676		chr4	187760194	187762116	-11.925	AC108865.1	ENSG00000083857	-112317	1.83256	9.53615	0.000125977	0.0260187
chr12	106482196	106482292	22.5007	NUAK1	ENSG00000074590	1461	1.30947	6.42306	0.00642731	0.384676		chr5	8844013	8845098	-25.9785	RP11-143A12.3	ENSG00000112902	420558	1.38467	6.48235	0.0438121	0.999905
chr12	115101828	115105547	63.8233	TBX3	ENSG00000135111	15847	-0.886675	7.56257	0.0131954	0.585731		chr5	31193046	31193432	-16.5133	CDH6	ENSG00000113361	-424	2.62705	8.34484	5.95261e-08	6.03274e-05
chr12	115123415	115123757	39.3788	TBX3	ENSG00000135111	-1445	-0.886675	7.56257	0.0131954	0.585731		chr5	31638273	31638596	-15.3371	PDZD2	ENSG00000133401	-920	2.27819	1.35573	0.00101734	0.123036
chr12	115128419	115129506	37.9436	TBX3	ENSG00000135111	-6449	-0.886675	7.56257	0.0131954	0.585731		chr5	31770333	31770816	-19.5714	RP11-5N11.7	ENSG00000133401	-28214	2.27819	1.35573	0.00101734	0.123036
chr12	115131142	115132889	39.8265	TBX3	ENSG00000135111	-9172	-0.886675	7.56257	0.0131954	0.585731		chr5	31855684	31856039	-23.4065	PDZD2	ENSG00000133401	56652	2.27819	1.35573	0.00101734	0.123036
chr12	115171807	115171968	18.8185	TBX3	ENSG00000135111	-49837	-0.886675	7.56257	0.0131954	0.585731		chr5	38445914	38446821	-45.8331	EGFLAM	ENSG00000164318	215	4.01235	2.85015	0.000770228	0.101587
chr12	115188338	115189175	30.3295	TBX3	ENSG00000135111	-66368	-0.886675	7.56257	0.0131954	0.585731		chr5	64468007	64469412	-33.717	ADAMTS6	ENSG00000049192	300105	1.11265	5.37421	0.00158295	0.166843
chr13	23499932	23500054	18.5432	SGCG	ENSG00000102683	-255036	2.40524	1.79099	7.72417e-05	0.0172485		chr5	111089861	111090680	-27.061	NREP	ENSG00000134986	1267	1.27567	6.57941	0.0139391	0.614204
chr13	110758779	110759339	21.1935	COL4A2	ENSG00000134871	-198819	1.01093	9.82173	0.015575	0.657695		chr5	129239049	129239339	-17.961	CHSY3	ENSG00000198108	-825	2.53824	2.03258	4.27338e-05	0.010623
chr13	110994378	110994451	17.3034	COL4A2	ENSG00000134871	34763	1.01093	9.82173	0.015575	0.657695		chr5	142151341	142151469	-18.8253	ARHGAP26	ENSG00000145819	-812	0.86219	4.76645	0.0418901	0.999905
chr13	111032343	111032980	18.6159	COL4A2	ENSG00000134871	72728	1.01093	9.82173	0.015575	0.657695		chr5	142586961	142587070	-20.2087	ARHGAP26	ENSG00000145819	195	0.86219	4.76645	0.0418901	0.999905
chr14	32673663	32673812	20.7172	AKAP6	ENSG00000151320	-124666	-1.46784	5.24429	0.000298859	0.0485258		chr5	142587389	142588283	-44.3055	ARHGAP26	ENSG00000145819	623	0.86219	4.76645	0.0418901	0.999905
chr14	35364606	35365138	21.0519	BAZ1A	ENSG00000198604	-19752	-0.741309	7.22242	0.0260246	0.895233		chr5	157949608	157950006	-18.4288	RP11-32D16.1	ENSG00000164330	576694	1.46241	4.49527	0.000126391	0.0260187
chr14	75417462	75420392	28.7261	PGF	ENSG00000119630	1552	-1.97562	2.31907	0.0100852	0.505216		chr5	158166893	158167649	-18.1407	EBF1	ENSG00000164330	359051	1.46241	4.49527	0.000126391	0.0260187
chr14	100124481	100125613	34.2218	HHIPL1	ENSG00000182218	13000	1.34365	3.22516	0.00451765	0.318289		chr5	158438104	158438572	-26.3496	EBF1	ENSG00000164330	88128	1.46241	4.49527	0.000126391	0.0260187
chr15	33411101	33412837	22.3606	FMN1	ENSG00000248905	34277	1.38454	4.02732	0.0236415	0.848709		chr5	158559976	158560521	-13.5187	RNF145	ENSG00000164330	-33206	1.46241	4.49527	0.000126391	0.0260187
chr15	51633628	51633757	15.82	GLDN	ENSG00000186417	-68	-2.48181	5.76327	0.000106872	0.0227103		chr5	178667980	178668544	-18.6416	ADAMTS2	ENSG00000087116	103886	1.72039	6.89244	2.45119e-05	0.00733963
chr15	101300331	101300443	13.7452	ALDH1A3	ENSG00000184254	-117475	-1.23769	7.20733	0.0189318	0.743695		chr5	178731495	178731896	-18.2458	ADAMTS2	ENSG00000087116	40534	1.72039	6.89244	2.45119e-05	0.00733963
chr15	102031621	102032720	27.1159	PCSK6	ENSG00000140479	-1433	1.77758	0.228866	0.0058813	0.370747		chr5	178769937	178770408	-17.8004	ADAMTS2	ENSG00000087116	2022	1.72039	6.89244	2.45119e-05	0.00733963
chr17	41007959	41009243	25.1867	AOC3	ENSG00000131471	1814	2.1179	2.03303	0.000564453	0.0819751		chr5	178804046	178804475	-18.7043	RP11-443C10.2	ENSG00000087116	-31614	1.72039	6.89244	2.45119e-05	0.00733963
chr17	77018640	77018974	18.2288	C1QTNF1	ENSG00000173918	0	-1.67154	4.97256	2.92165e-05	0.00818995		chr5	178806048	178806267	-14.8949	RP11-443C10.1	ENSG00000087116	-33616	1.72039	6.89244	2.45119e-05	0.00733963
chr18	515807	516118	24.5059	COLEC12	ENSG00000158270	-15084	-1.85346	4.89682	0.00617776	0.379227		chr5	178866502	178867145	-20.0106	RP11-798K23.1	ENSG00000087116	-94070	1.72039	6.89244	2.45119e-05	0.00733963
chr18	52626074	52626380	30.8187	CCDC68	ENSG00000166510	358	-1.49012	4.04369	0.023442	0.84526		chr6	2877211	2877999	-34.5067	RP11-420G6.4	ENSG00000170542	25514	1.26091	4.08771	0.0252484	0.880019
chr18	52627127	52627333	31.0335	CCDC68	ENSG00000166510	-387	-1.49012	4.04369	0.023442	0.84526		chr6	2901099	2902702	-28.611	SERPINB9	ENSG00000170542	811	1.26091	4.08771	0.0252484	0.880019
chr19	2528954	2529151	14.2786	GADD45B	ENSG00000099860	52599	1.27478	6.16018	0.0188538	0.743695		chr6	3426950	3428139	-28.9036	SLC22A23	ENSG00000137266	11512	1.25499	2.59469	0.0415009	0.999905
chr19	8669167	8669672	17.5565	ADAMTS10	ENSG00000142303	3510	1.03738	3.10308	0.048351	0.999905		chr6	3473667	3474130	-20.7735	SLC22A23	ENSG00000137266	-16410	1.25499	2.59469	0.0415009	0.999905
chr19	18490892	18491488	15.5227	GDF15	ENSG00000130513	-1491	-0.989751	4.27758	0.0185743	0.735264		chr6	3501053	3501608	-15.4534	SLC22A23	ENSG00000137266	-43796	1.25499	2.59469	0.0415009	0.999905
chr19	56003441	56003776	15.4865	SSC5D	ENSG00000179954	-1481	1.71234	2.38386	0.00140273	0.151483		chr6	3722298	3723031	-25.5986	PXDC1	ENSG00000168994	16096	0.769445	5.68055	0.0194528	0.753794
chr20	5829391	5829912	20.5884	CHGB	ENSG00000089199	-62163	-2.4462	2.38912	0.0245366	0.86746		chr6	3743461	3743715	-26.6361	PXDC1	ENSG00000168994	-4332	0.769445	5.68055	0.0194528	0.753794
chr20	10257726	10257932	25.1853	SNAP25	ENSG00000132639	58011	-2.01888	5.40669	0.0414342	0.999905		chr6	3759345	3760255	-22.3771	RP11-420L9.2	ENSG00000168994	-7084	0.769445	5.68055	0.0194528	0.753794
chr20	46431496	46431803	22.844	SULF2	ENSG00000196562	-16135	1.48992	7.08137	0.0459463	0.999905		chr6	7543901	7544197	-20.4912	DSP	ENSG00000096696	2050	6.29257	4.99855	1.5192e-05	0.0047656
chr20	56287198	56287577	16.8198	PMEPA1	ENSG00000124225	-656	1.96327	2.95794	0.00421983	0.305474		chr6	11277808	11278545	-20.014	NEDD9	ENSG00000111859	-44892	2.2177	3.83763	0.0384555	0.999905
chr20	56384144	56384556	26.8218	PMEPA1	ENSG00000124225	-97602	1.96327	2.95794	0.00421983	0.305474		chr6	14001521	14002059	-15.4596	RP3-380E11.2	ENSG00000180537	76096	2.7864	0.632308	6.80182e-05	0.0154507
chr22	22113452	22115113	30.9784	YPEL1	ENSG00000100027	-23328	-1.16309	1.94788	0.0475957	0.999905		chr6	35700340	35700725	-24.2966	FKBP5	ENSG00000096060	-3979	-1.06834	4.07964	0.0379185	0.999905
chr22	28009090	28009656	19.1267	MN1	ENSG00000169184	187829	2.35775	1.58542	0.000301751	0.0485258		chr6	52408445	52408553	-28.5304	TRAM2	ENSG00000065308	33159	0.71972	7.31169	0.0493932	0.999905
chr22	33875769	33876458	38.9957	LARGE	ENSG00000133424	91780	0.786829	4.18771	0.0421189	0.999905		chr6	52408863	52409810	-34.3089	TRAM2	ENSG00000065308	31902	0.71972	7.31169	0.0493932	0.999905
chr22	33876803	33877612	30.7791	LARGE	ENSG00000133424	90626	0.786829	4.18771	0.0421189	0.999905		chr6	133561386	133561765	-28.4872	EYA4	ENSG00000112319	0	-1.00378	6.58314	0.0337585	0.999905
chr22	34246563	34246888	19.136	LARGE	ENSG00000133424	10723	0.786829	4.18771	0.0421189	0.999905		chr6	152000396	152000727	-18.7927	ESR1	ENSG00000091831	10903	2.30021	0.832354	0.000200911	0.0356846
chrX	11447857	11448142	29.5404	ARHGAP6	ENSG00000047648	-1963	-1.38444	5.43879	0.00585548	0.370747		chr6	152011200	152011723	-17.828	ESR1	ENSG00000091831	0	2.30021	0.832354	0.000200911	0.0356846
chrX	17876184	17876224	30.7427	RAI2	ENSG00000131831	2602	2.40034	1.88392	0.00723389	0.414211		chr6	152012049	152013596	-26.9345	ESR1	ENSG00000091831	417	2.30021	0.832354	0.000200911	0.0356846
chrX	46907473	46907596	20.713	RGN	ENSG00000130988	-30178	1.73651	1.91975	0.0196863	0.758384		chr6	152078799	152079083	-15.9898	ESR1	ENSG00000091831	-46482	2.30021	0.832354	0.000200911	0.0356846
												chr6	152127502	152127821	-23.7881	ESR1	ENSG00000091831	-509	2.30021	0.832354	0.000200911	0.0356846
												chr6	152438731	152439008	-23.9535	SYNE1	ENSG00000131018	50477	0.952974	8.1287	0.0211222	0.792806
												chr6	152551957	152552179	-36.7867	SYNE1	ENSG00000131018	-4984	0.952974	8.1287	0.0211222	0.792806
												chr6	152574640	152574901	-25.0781	SYNE1	ENSG00000131018	-27667	0.952974	8.1287	0.0211222	0.792806
												chr6	152589214	152589566	-34.6837	SYNE1	ENSG00000131018	33691	0.952974	8.1287	0.0211222	0.792806
												chr6	152620413	152620697	-35.0807	SYNE1	ENSG00000131018	2560	0.952974	8.1287	0.0211222	0.792806
												chr6	152621422	152622038	-32.6489	SYNE1	ENSG00000131018	1219	0.952974	8.1287	0.0211222	0.792806
												chr6	169396193	169396794	-30.7902	RP3-495K2.3	ENSG00000186340	255451	1.65697	9.16276	0.0350115	0.999905
												chr6	169397291	169397321	-19.7776	RP3-495K2.3	ENSG00000186340	254924	1.65697	9.16276	0.0350115	0.999905
												chr6	169475670	169476152	-19.7655	RP3-495K2.1	ENSG00000186340	176093	1.65697	9.16276	0.0350115	0.999905
												chr6	169613545	169613779	-16.4734	XXyac-YX65C7_A.2	ENSG00000186340	38466	1.65697	9.16276	0.0350115	0.999905
												chr6	169630013	169630490	-27.1269	THBS2	ENSG00000186340	21755	1.65697	9.16276	0.0350115	0.999905
												chr6	169651576	169652414	-34.5238	THBS2	ENSG00000186340	0	1.65697	9.16276	0.0350115	0.999905
												chr6	169654652	169654874	-21.582	THBS2	ENSG00000186340	-512	1.65697	9.16276	0.0350115	0.999905
												chr6	169692419	169692757	-16.8376	XXyac-YX65C7_A.3	ENSG00000186340	-38279	1.65697	9.16276	0.0350115	0.999905
												chr6	169827750	169829085	-25.4164	RP1-137D17.2	ENSG00000186340	-173610	1.65697	9.16276	0.0350115	0.999905
												chr7	23286420	23286546	-20.6773	GPNMB	ENSG00000136235	25	2.35531	5.05438	0.0264247	0.904272
												chr7	68000231	68000304	-20.2644	RP5-859M6.1	ENSG00000158321	-1063600	1.29147	1.66979	0.0418204	0.999905
												chr7	70200242	70200811	-31.0924	AUTS2	ENSG00000158321	6116	1.29147	1.66979	0.0418204	0.999905
												chr7	80665198	80665625	-20.7141	SEMA3C	ENSG00000075223	-113522	0.78883	8.65544	0.0353425	0.999905
												chr7	87103929	87104561	-21.4786	ABCB4	ENSG00000005471	219	3.09515	1.47843	7.88933e-05	0.0173237
												chr7	94283930	94284258	-20.4536	SGCE	ENSG00000127990	1151	0.983182	5.9121	0.00385635	0.28749
												chr7	98466610	98466938	-17.963	TMEM130	ENSG00000166448	0	2.80536	2.36926	0.046952	0.999905
												chr8	12754149	12754515	-13.5991	AC090133.1	ENSG00000250305	-48635	1.27153	3.07319	0.00639168	0.384523
												chr8	12917133	12917234	-15.3543	RNU6-842P	ENSG00000164741	56518	0.949668	7.86816	0.00548068	0.355704
												chr8	13014487	13015144	-24.1521	Y_RNA	ENSG00000164741	-23503	0.949668	7.86816	0.00548068	0.355704
												chr8	13061546	13061937	-26.8884	Y_RNA	ENSG00000164741	-70562	0.949668	7.86816	0.00548068	0.355704
												chr8	13062767	13063019	-21.8829	Y_RNA	ENSG00000164741	71035	0.949668	7.86816	0.00548068	0.355704
												chr8	17532314	17534512	-31.0256	MTUS1	ENSG00000129422	0	1.0614	5.36299	0.00201732	0.198345
												chr8	17615519	17615910	-25.026	MTUS1	ENSG00000129422	-2028	1.0614	5.36299	0.00201732	0.198345
												chr8	17616236	17617276	-28.9571	MTUS1	ENSG00000129422	-2745	1.0614	5.36299	0.00201732	0.198345
												chr8	17659629	17660298	-23.6325	RP11-156K13.1	ENSG00000129422	-1202	1.0614	5.36299	0.00201732	0.198345
												chr8	42052370	42053760	-31.1584	PLAT	ENSG00000104368	0	-1.99995	10.2012	0.00627029	0.380696
												chr8	59049068	59049702	-15.2173	RP11-648L3.1	ENSG00000169122	141954	1.62579	3.36794	0.00853836	0.454876
												chr8	72460643	72460806	-29.4303	RP11-1102P16.1	ENSG00000253379	-750	2.91413	0.717977	0.00638148	0.384523
												chr8	72466047	72466364	-28.2581	RP11-1102P16.1	ENSG00000253379	-6154	2.91413	0.717977	0.00638148	0.384523
												chr8	72467529	72468207	-30.5631	RP11-1102P16.1	ENSG00000253379	-7636	2.91413	0.717977	0.00638148	0.384523
												chr8	96733920	96734752	-14.9946	AC116154.1	ENSG00000156466	438267	2.5745	4.9357	8.30481e-06	0.00266868
												chr8	97509151	97509765	-21.0188	SDC2	ENSG00000169439	2914	1.79716	6.64577	0.00030202	0.0485258
												chr8	97602774	97603616	-23.8364	SDC2	ENSG00000169439	4158	1.79716	6.64577	0.00030202	0.0485258
												chr8	121665754	121666457	-18.3775	CTC-820M8.1	ENSG00000172164	157925	1.85742	5.4303	0.00173305	0.176999
												chr8	121704204	121704533	-10.138	SNTB1	ENSG00000172164	119849	1.85742	5.4303	0.00173305	0.176999
												chr9	14346019	14346757	-43.3214	RP11-120J1.1	ENSG00000147862	-23681	1.71421	4.52921	0.00429307	0.309077
												chr9	14365207	14365306	-22.1749	RP11-120J1.1	ENSG00000147862	33675	1.71421	4.52921	0.00429307	0.309077
												chr9	14365670	14366772	-25.038	RP11-120J1.1	ENSG00000147862	32209	1.71421	4.52921	0.00429307	0.309077
												chr9	71741312	71741604	-48.546	TJP2	ENSG00000119139	5087	-0.924524	5.51594	0.0152923	0.649923
												chr9	72289453	72290337	-21.8077	RP11-109D9.4	ENSG00000107282	-2230	1.33889	3.04444	0.0277651	0.928248
												chr9	91309331	91309724	-19.1059	RP13-60M5.2	ENSG00000130045	159310	1.56404	-0.109563	0.00879995	0.46191
												chr9	101707308	101707566	-24.865	RP11-92C4.6	ENSG00000204291	1386	1.08115	9.85881	0.0282124	0.928248
												chr9	113340796	113341059	-24.6345	SVEP1	ENSG00000165124	763	1.67127	8.98783	0.00282676	0.237741
												chr10	44878533	44878957	-19.0041	CXCL12	ENSG00000107562	1533	1.92458	6.7614	0.0184602	0.735264
												chr10	44881151	44881346	-11.2335	CXCL12	ENSG00000107562	-610	1.92458	6.7614	0.0184602	0.735264
												chr10	45064085	45066604	-20.8986	RP11-733D4.1	ENSG00000107562	-183544	1.92458	6.7614	0.0184602	0.735264
												chr10	50323872	50323972	-20.8499	VSTM4	ENSG00000165633	-317	1.36832	4.08483	0.0197473	0.758517
												chr10	52833058	52833222	-20.9391	PRKG1	ENSG00000185532	-711	1.11885	6.05588	0.00168035	0.172958
												chr10	77167392	77168195	-36.7329	RP11-399K21.14	ENSG00000165655	-5727	-0.87488	3.8793	0.0407933	0.999905
												chr10	90752494	90752671	-26.1532	FAS	ENSG00000107796	-1346	2.46831	9.54512	0.0115638	0.554009
												chr10	100991193	100991587	-22.3097	HPSE2	ENSG00000172987	3971	-1.60692	1.08192	0.0172168	0.704364
												chr10	105396822	105397102	-22.9542	SH3PXD2A	ENSG00000107957	24359	0.852367	7.57893	0.0241212	0.858912
												chr10	105426921	105427632	-21.5561	Y_RNA	ENSG00000107957	-5458	0.852367	7.57893	0.0241212	0.858912
												chr10	125823788	125824033	-10.2504	CHST15	ENSG00000182022	-17546	1.99771	4.38247	0.00103601	0.124085
												chr10	125854101	125854439	-19.2904	CHST15	ENSG00000182022	-894	1.99771	4.38247	0.00103601	0.124085
												chr10	125929484	125929847	-15.8018	CHST15	ENSG00000182022	-76277	1.99771	4.38247	0.00103601	0.124085
												chr11	27492378	27493080	-36.8846	RP11-159H22.2	ENSG00000205213	780	0.950328	5.18116	0.00825033	0.451029
												chr11	63974772	63975731	-29.8442	FERMT3	ENSG00000149781	0	1.67849	0.561957	0.0234812	0.84526
												chr11	64513825	64513976	-19.4605	RASGRP2	ENSG00000068831	-896	2.3861	0.924121	0.00107039	0.126616
												chr11	64526677	64527193	-31.2609	PYGM	ENSG00000068976	252	1.54648	1.32184	0.00605701	0.376274
												chr11	79147984	79148110	-17.3494	TENM4	ENSG00000149256	3584	-1.04628	5.13347	0.0120608	0.562443
												chr11	95216415	95216621	-18.5903	RP11-338H14.1	ENSG00000149212	-250709	0.983635	5.55094	0.0455584	0.999905
												chr11	108422326	108423031	-14.1935	EXPH5	ENSG00000110723	0	2.76986	1.43719	0.00944959	0.481938
												chr11	117071038	117071449	-29.6957	TAGLN	ENSG00000149591	66	1.642	9.63644	0.013204	0.585731
												chr11	117071799	117072571	-32.4955	TAGLN	ENSG00000149591	0	1.642	9.63644	0.013204	0.585731
												chr11	130327688	130328335	-32.0711	ADAMTS15	ENSG00000166106	8818	1.32838	3.16245	0.0311181	0.969221
												chr12	2194603	2195214	-23.1707	CACNA1C	ENSG00000151067	31873	1.10936	5.59768	0.00421847	0.305474
												chr12	2195606	2196376	-25.6125	CACNA1C	ENSG00000151067	32876	1.10936	5.59768	0.00421847	0.305474
												chr12	2307088	2308252	-29.8037	CACNA1C-AS4	ENSG00000151067	144358	1.10936	5.59768	0.00421847	0.305474
												chr12	2357507	2357839	-19.1633	CACNA1C-IT3	ENSG00000151067	194777	1.10936	5.59768	0.00421847	0.305474
												chr12	2360460	2361337	-21.8968	CACNA1C-IT3	ENSG00000151067	197730	1.10936	5.59768	0.00421847	0.305474
												chr12	2376663	2377106	-26.7851	CACNA1C-IT3	ENSG00000151067	213933	1.10936	5.59768	0.00421847	0.305474
												chr12	2377424	2377748	-25.3542	CACNA1C-IT3	ENSG00000151067	214694	1.10936	5.59768	0.00421847	0.305474
												chr12	2395710	2396844	-33.5523	CACNA1C-IT3	ENSG00000151067	232980	1.10936	5.59768	0.00421847	0.305474
												chr12	6320598	6321649	-30.0353	CD9	ENSG00000010278	10634	-0.680192	7.27305	0.0372575	0.999905
												chr12	15110977	15111143	-20.119	ARHGDIB	ENSG00000111348	3056	1.09178	2.06834	0.043439	0.999905
												chr12	20503389	20503618	-11.1609	PDE3A	ENSG00000172572	-18560	5.41218	4.6738	5.86486e-09	1.39301e-05
												chr12	20524002	20524221	-11.0154	RP11-284H19.1	ENSG00000172572	1822	5.41218	4.6738	5.86486e-09	1.39301e-05
												chr12	76293435	76294595	-25.1015	RP11-290L1.6	ENSG00000139289	130788	-1.29495	8.3833	0.000660922	0.0897696
												chr12	80082103	80082405	-30.2644	PAWR	ENSG00000177425	1454	1.04739	5.83416	0.031452	0.975011
												chr12	80866825	80866977	-18.9351	PTPRQ	ENSG00000139304	28698	2.19319	1.56095	0.00131875	0.146004
												chr12	83082286	83083548	-34.065	TMTC2	ENSG00000179104	1505	2.19168	3.95542	0.00852853	0.454876
												chr13	41238237	41238403	-24.5773	FOXO1	ENSG00000150907	2330	1.0681	1.45465	0.0368307	0.999905
												chr13	110869091	110869282	-29.8109	COL4A1	ENSG00000134871	-88876	1.01093	9.82173	0.015575	0.657695
												chr13	110886667	110886883	-22.7386	COL4A1	ENSG00000134871	-71275	1.01093	9.82173	0.015575	0.657695
												chr13	110903041	110903661	-34.3055	COL4A2	ENSG00000134871	-54497	1.01093	9.82173	0.015575	0.657695
												chr13	110982062	110983035	-35.851	COL4A2	ENSG00000134871	22447	1.01093	9.82173	0.015575	0.657695
												chr14	58619661	58619945	-18.1731	C14orf37	ENSG00000139971	-729	1.69383	0.795719	0.00607068	0.376274
												chr14	59157693	59158024	-18.9106	DACT1	ENSG00000165617	52137	1.01332	5.54241	0.0156411	0.658375
												chr14	59232439	59232754	-23.1344	AL121819.1	ENSG00000165617	126883	1.01332	5.54241	0.0156411	0.658375
												chr14	80681383	80681537	-22.2404	DIO2	ENSG00000211448	964	1.27795	7.06853	0.00478288	0.325818
												chr14	80681904	80682715	-30.6306	DIO2	ENSG00000211448	0	1.27795	7.06853	0.00478288	0.325818
												chr14	80683177	80683195	-27.7867	DIO2	ENSG00000211448	674	1.27795	7.06853	0.00478288	0.325818
												chr14	86297125	86297560	-19.6846	CTD-2341M24.1	ENSG00000185070	300552	1.38552	4.35817	0.0158769	0.666171
												chr14	92359229	92359861	-21.0726	FBLN5	ENSG00000140092	-14842	0.910509	7.80847	0.0295744	0.948037
												chr14	93152996	93153028	-20.2679	LGMN	ENSG00000100600	30775	1.25699	4.84131	0.00126969	0.142976
												chr14	100111133	100111269	-19.2492	HHIPL1	ENSG00000182218	-177	1.34365	3.22516	0.00451765	0.318289
												chr15	25962306	25963347	-22.0882	RNA5SP390	ENSG00000206190	-22333	3.97571	2.85549	4.75038e-07	0.00029803
												chr15	26020181	26021471	-22.7414	RNA5SP390	ENSG00000206190	-80208	3.97571	2.85549	4.75038e-07	0.00029803
												chr15	26047100	26047575	-14.6325	Y_RNA	ENSG00000206190	60779	3.97571	2.85549	4.75038e-07	0.00029803
												chr15	26094380	26095218	-18.5996	MIR4715	ENSG00000206190	13136	3.97571	2.85549	4.75038e-07	0.00029803
												chr15	26107211	26107649	-17.3944	ATP10A	ENSG00000206190	705	3.97571	2.85549	4.75038e-07	0.00029803
												chr15	26179728	26180099	-11.4114	RP11-446P9.1	ENSG00000206190	-71372	3.97571	2.85549	4.75038e-07	0.00029803
												chr15	26348375	26349356	-14.0581	LINC00929	ENSG00000206190	-240019	3.97571	2.85549	4.75038e-07	0.00029803
												chr15	33244459	33245938	-28.2299	SNORD77	ENSG00000248905	-25997	1.38454	4.02732	0.0236415	0.848709
												chr15	33487590	33487681	-14.6579	FMN1	ENSG00000248905	-692	1.38454	4.02732	0.0236415	0.848709
												chr15	49166553	49167144	-25.3406	SHC4	ENSG00000185634	2541	-1.48385	4.81541	0.0096177	0.485491
												chr15	52044623	52044958	-22.7895	CTD-2308G16.1	ENSG00000128872	758	1.22209	4.35116	0.00250064	0.222607
												chr15	63663976	63664568	-19.567	CA12	ENSG00000074410	9465	-0.850678	5.47548	0.036578	0.999905
												chr15	64232105	64232359	-15.4593	RP11-111E14.1	ENSG00000035664	100106	1.09792	2.31562	0.0420894	0.999905
												chr15	68723192	68723394	-19.4752	ITGA11	ENSG00000137809	1097	3.16224	6.29834	0.000174654	0.0319592
												chr15	69592025	69592182	-18.6027	PAQR5	ENSG00000137819	733	-1.95687	5.49974	0.00133296	0.146348
												chr15	101396080	101396691	-21.2851	RP11-66B24.2	ENSG00000184254	-21227	-1.23769	7.20733	0.0189318	0.743695
												chr15	101418829	101419296	-29.093	ALDH1A3	ENSG00000184254	-284	-1.23769	7.20733	0.0189318	0.743695
												chr15	101860763	101861388	-27.3563	PCSK6	ENSG00000140479	-7155	1.77758	0.228866	0.0058813	0.370747
												chr15	101912739	101913478	-15.7943	PCSK6	ENSG00000140479	-2065	1.77758	0.228866	0.0058813	0.370747
												chr15	102028343	102028792	-27.6799	PCSK6	ENSG00000140479	847	1.77758	0.228866	0.0058813	0.370747
												chr16	1219735	1220473	-20.7078	RP11-616M22.2	ENSG00000196557	15996	3.66857	3.19175	0.0164709	0.680266
												chr17	7118899	7119182	-20.0686	ACADVL	ENSG00000072778	-1261	-0.648285	7.23427	0.0497438	0.999905
												chr17	10100062	10100599	-20.3199	GAS7	ENSG00000007237	1268	1.51708	4.20822	0.00449637	0.318289
												chr17	41003295	41003399	-22.4872	AOC3	ENSG00000131471	93	2.1179	2.03303	0.000564453	0.0819751
												chr17	46618319	46620300	-35.5687	HOXB2	ENSG00000173917	3140	1.09039	2.61569	0.043447	0.999905
												chr17	47076365	47076656	-21.0425	IGF2BP1	ENSG00000159217	1256	1.63763	1.58799	0.00366621	0.282469
												chr17	53525782	53526262	-14.9913	RP11-515E23.2	ENSG00000108960	-26428	-1.19686	7.0241	0.0298041	0.950773
												chr17	66904946	66905298	-18.9708	ABCA8	ENSG00000141338	32926	0.955513	7.54534	0.0401525	0.999905
												chr17	74521501	74521596	-19.035	PRCD	ENSG00000161544	6550	-0.818281	6.71473	0.0243297	0.863998
												chr18	34272808	34275305	-29.0769	FHOD3	ENSG00000134775	-23214	0.739395	4.96837	0.0346128	0.999905
												chr18	59410348	59410474	-23.8268	RP11-1096D5.1	ENSG00000176641	150517	-0.923665	5.13831	0.0178997	0.721253
												chr18	59411111	59411285	-24.1324	RP11-1096D5.1	ENSG00000176641	149706	-0.923665	5.13831	0.0178997	0.721253
												chr18	59562530	59562590	-23.8676	RNF152	ENSG00000176641	-1065	-0.923665	5.13831	0.0178997	0.721253
												chr19	672809	672870	-20.2692	FSTL3	ENSG00000070404	-3521	1.465	4.99585	6.67271e-05	0.0154233
												chr19	2469606	2469853	-17.0368	GADD45B	ENSG00000099860	-6271	1.27478	6.16018	0.0188538	0.743695
												chr19	2495922	2496149	-20.2825	RNU6-993P	ENSG00000099860	19567	1.27478	6.16018	0.0188538	0.743695
												chr19	2525421	2525546	-18.3525	TCEB1P28	ENSG00000099860	49066	1.27478	6.16018	0.0188538	0.743695
												chr19	2542550	2543035	-21.9858	TCEB1P28	ENSG00000099860	66195	1.27478	6.16018	0.0188538	0.743695
												chr19	2555274	2555384	-18.9583	TCEB1P28	ENSG00000099860	78919	1.27478	6.16018	0.0188538	0.743695
												chr19	7159534	7159714	-20.1672	AC010311.1	ENSG00000171105	8274	1.10223	4.60291	0.00390427	0.288982
												chr19	7196237	7196866	-26.6753	INSR	ENSG00000171105	-28247	1.10223	4.60291	0.00390427	0.288982
												chr19	10118898	10119360	-22.3742	COL5A3	ENSG00000080573	1786	2.22531	4.40304	5.40737e-05	0.013193
												chr19	11646552	11646595	-20.0697	CNN1	ENSG00000130176	-2936	1.63042	5.77399	0.0199226	0.763024
												chr19	14064500	14064658	-18.4014	PODNL1	ENSG00000132000	-295	1.25124	2.06348	0.0303113	0.957275
												chr19	15321010	15321372	-19.5603	NOTCH3	ENSG00000074181	-9217	1.94367	4.59131	0.000621095	0.0863126
												chr19	43979155	43979683	-28.5202	LYPD3	ENSG00000124466	-9342	-2.17703	2.39889	0.0152755	0.649923
												chr19	50037622	50037743	-17.3874	RCN3	ENSG00000142552	5738	1.00482	6.82876	0.0416071	0.999905
												chr20	19447205	19447275	-11.8377	AL139429.1	ENSG00000185052	253914	1.51469	1.43608	0.0126134	0.57304
												chr20	36859967	36860855	-20.118	KIAA1755	ENSG00000149633	-4345	1.29639	2.67888	0.0116865	0.555846
												chr20	46311265	46311378	-11.5143	CTD-2653D5.1	ENSG00000196562	-17261	1.48992	7.08137	0.0459463	0.999905
												chr20	46402636	46403262	-21.9563	SULF2	ENSG00000196562	10970	1.48992	7.08137	0.0459463	0.999905
												chr20	46412818	46412989	-18.7814	SULF2	ENSG00000196562	1243	1.48992	7.08137	0.0459463	0.999905
												chr20	46825822	46826175	-16.8952	SNORD36	ENSG00000196562	-410461	1.48992	7.08137	0.0459463	0.999905
												chr20	56251014	56251190	-25.6401	PMEPA1	ENSG00000124225	14489	1.96327	2.95794	0.00421983	0.305474
												chr21	27013270	27013525	-19.3311	JAM2	ENSG00000154721	1359	1.33384	0.919163	0.0295474	0.948037
												chr21	33244205	33244443	-15.9853	HUNK	ENSG00000142149	-1184	3.03479	1.60366	0.000771057	0.101587
												chr21	33280764	33280927	-11.4675	HUNK	ENSG00000142149	-15936	3.03479	1.60366	0.000771057	0.101587
												chr21	33318019	33318532	-11.2782	HUNK	ENSG00000142149	21154	3.03479	1.60366	0.000771057	0.101587
												chr21	46784940	46785033	-19.8966	MTCO1P3	ENSG00000182871	-40018	0.923119	7.86049	0.0422064	0.999905
												chr21	46807555	46807705	-20.088	BX322559.3	ENSG00000182871	-17346	0.923119	7.86049	0.0422064	0.999905
												chr21	46826257	46827096	-41.1115	COL18A1	ENSG00000182871	1204	0.923119	7.86049	0.0422064	0.999905
												chr21	46836727	46836802	-17.6449	COL18A1-AS2	ENSG00000182871	11674	0.923119	7.86049	0.0422064	0.999905
												chr21	46890589	46891114	-32.5222	COL18A1	ENSG00000182871	15164	0.923119	7.86049	0.0422064	0.999905
												chr22	27972262	27973953	-29.6438	RP1-231P7P.1	ENSG00000169184	223532	2.35775	1.58542	0.000301751	0.0485258
												chr22	28034930	28035561	-20.1374	RP1-231P7P.1	ENSG00000169184	161924	2.35775	1.58542	0.000301751	0.0485258
												chr22	28180755	28181832	-35.0186	MN1	ENSG00000169184	15653	2.35775	1.58542	0.000301751	0.0485258
												chr22	28193535	28194558	-32.3445	MN1	ENSG00000169184	2927	2.35775	1.58542	0.000301751	0.0485258
												chr22	33872472	33873361	-17.1638	MIR4764	ENSG00000133424	-92258	0.786829	4.18771	0.0421189	0.999905
												chr22	34304597	34305149	-21.2881	LARGE	ENSG00000133424	11176	0.786829	4.18771	0.0421189	0.999905
												chr22	34314005	34314119	-19.0728	LARGE	ENSG00000133424	2206	0.786829	4.18771	0.0421189	0.999905
												chrX	3262532	3262844	-31.0552	MXRA5	ENSG00000101825	1837	1.31664	7.75097	0.00861455	0.455502
												chrX	7249154	7249911	-24.5308	STS	ENSG00000101846	111656	0.856582	4.97741	0.0283935	0.928248
												chrX	10127169	10127414	-23.9488	CLCN4	ENSG00000073464	596	1.08525	1.99582	0.0339093	0.999905
												chrX	33745255	33745805	-21.809	RP11-305F18.1	ENSG00000198947	-387696	1.40323	5.54985	0.000841578	0.107648
												chrX	46938215	46938548	-26.0101	RGN	ENSG00000130988	435	1.73651	1.91975	0.0196863	0.758384
												chrX	71239305	71239491	-18.165	RPS26P11	ENSG00000204131	108366	1.68559	2.36967	0.00722166	0.414211
												chrX	102469517	102469726	-25.6408	BEX4	ENSG00000102409	-293	1.13819	4.19718	0.00463129	0.321444
												chrX	118808807	118809731	-22.4862	SEPT6	ENSG00000125354	17060	0.916345	4.37672	0.0239022	0.855739
												chrX	152759533	152759613	-20.9741	BGN	ENSG00000182492	-783	1.37203	3.71569	0.0430951	0.999905
