# Supplementary material for: Enduring epigenetic landmarks define the cancer microenvironment
Source: HighWire-hosted journal article supplement (doi:10.1101/gr.229070.117), 2018-04-12
Supplement: Supplemental_Table_S4.xlsx [file Supplemental_Table_S4.xlsx]

## Sheet: Supplemental Table S4
Supplemental Table S4: Comparison of all DMRs to DMRs associated with differentially expressed protein coding genes (DE-DMRs).
	Hypermethylated DMRs				Hypomethylated DMRs
Feature	Permutation P value	Average (mean) of DE-DMRs (n=131)	Average (mean) of all DMRs with no associated DE (n=2365)		Permutation P value	Average (mean) of DE-DMRs (n=314)	Average (mean) of all DMRs with no associated DE (n=4724)
AreaStat methylation difference	0.135	48.6139	40.6086		0.0001	-56.1911	-41.8837
Mean methylation difference (%)	0.0001	24.7443	21.8046		0.0105	-23.6081	-22.4386
Distance to TSS (bp)	0.9115	-10978.1	-9578.53		0.9294	-5759.75	-6453.12
Width (bp)	0.1166	526.481	456.833		0.0002	535.962	420.386
Number of CpGs	0.1747	12.3664	10.7899		0.0004	13.8248	10.9958
CpG density	0.6709	48.7708	47.3945		0.3061	43.9391	41.9424
Distance to CpG Island (bp)	0.3858	32511.7	42165.6		0.2267	46809.9	37597.5
Promoter (%)	0.8689	32.0558	33.0426		0.1271	39.9502	45.8902
Gene body (%)	0.3784	48.6832	43.3969		0.0417	43.327	35.7107
Intergenic (%)	0.4063	19.261	23.5605		0.5877	16.7229	18.3992
Promoter (protein coding) (%)	0.6321	23.0948	20.7154		0.784	32.0495	33.0554
Genebody (protein coding) (%)	0.9413	45.9111	45.4494		0.214	43.1724	38.4453
Intergenic (protein coding) (%)	0.6299	30.9942	33.8353		0.2962	24.7781	28.4993
CpG island (%)	0.4691	2.89303	1.84449		0.527	4.44028	3.58391
CpG island shore (%)	0.1012	34.3928	25.6967		0.3031	35.5007	39.4236
Non-CpG Island (%)	0.08	62.7141	72.4588		0.5982	60.059	56.9924
