# Supplementary material for: Enduring epigenetic landmarks define the cancer microenvironment
Source: HighWire-hosted journal article supplement (doi:10.1101/gr.229070.117), 2018-04-12
Supplement: Supplemental_Table_S5.xlsx [file Supplemental_Table_S5.xlsx]

## Sheet: Supplementary Table S5
Supplemental Table S5: Ingenuity Pathway Analysis of differentially expressed protein coding genes associated with DMRs (DE-DMRs).
IPA of DE-DMRs
	Hypermethylated				Hypomethylated DMRs
Top Networks	ID Associated Network Functions	Score	Focus Molecules		ID Associated Network Functions	Score	Focus Molecules
	Embryonic Development, Organismal Development, Cancer	47	22		Cancer, Gastrointestinal Disease, Organismal Injury and Abnormalities	41	22
	Cell Morphology, Cell-To-Cell Signaling and Interaction, Tissue Development	47	22		Cancer, Connective Tissue Disorders, Organismal Injury and Abnormalities	41	22
	Cellular Development, Cellular Growth and Proliferation, Endocrine System Development and Function	22	12		Connective Tissue Disorders, Developmental Disorder, Skeletal and Muscular Disorders	41	22
	Cancer, Cellular Development, Organismal Injury and Abnormalities	22	12		Molecular Transport, Energy Production, Nucleic Acid Metabolism	27	16
	Embryonic Development, Hair and Skin Development and Function, Organ Development	19	11		Cancer, Gastrointestinal Disease, Organismal Injury and Abnormalities	25	15
	Cell Signaling, DNA Replication, Recombination, and Repair, Nucleic Acid Metabolism	17	10		Endocrine System Development and Function, Lipid Metabolism, Small Molecule Biochemistry	25	15
	Cell Death and Survival, Cellular Development, Reproductive System Development and Function	2	1		Cardiovascular Disease, Organismal Injury and Abnormalities, Cellular Development	22	14
					Free Radical Scavenging, Molecular Transport, Small Molecule Biochemistry	22	14
					Cell Death and Survival, Gene Expression, Cell Signaling	20	13
					Cell Signaling, Molecular Transport, Nucleic Acid Metabolism	20	13
					Cellular Development, Embryonic Development, Hair and Skin Development and Function	4	4
					Cell Death and Survival, Cellular Development, Reproductive System Development and Function	2	1
					Cellular Assembly and Organization, Cellular Compromise, Cell-mediated Immune Response	2	1
					Cellular Assembly and Organization, Developmental Disorder, Hereditary Disorder	2	1
Top Upstream Regulators (Top 10)	Upstream Regulator	p-value of overlap	Targets genes in dataset		Upstream Regulator	p-value of overlap	Targets genes in dataset
	CTNNB1	1.23e-05	12		CTNNB1	2.75e-10	24
	IGFBP2	2.91e-05	4		TNF	8.19e-10	37
	TGFB1	3.93e-05	18		WNT3A	4.55e-09	14
	HRAS	6.39e-05	10		progesterone	1.49e-08	20
	ICMT	0.000118	3		HRAS	2.28e-07	18
	NKX2-3	0.000176	6		TP53	3.78e-07	29
	SMO	0.00018	4		BRCA1	6.2e-07	10
	SMAD3	0.000209	6		GNA15	6.59e-07	8
	CREB1	0.000231	9		TGFB1	9.61e-07	31
	Tgf beta	0.000266	6		forskolin	1.77e-06	18
IPA of tsDMRs
	Hypermethylated				Hypomethylated DMRs
Top Networks	ID Associated Network Functions	Score	Focus Molecules		ID Associated Network Functions	Score	Focus Molecules
	Lipid Metabolism, Small Molecule Biochemistry, Cellular Assembly and Organization	42	24		Cancer, Connective Tissue Disorders, Organismal Injury and Abnormalities	55	31
	Embryonic Development, Organismal Development, Tissue Morphology	37	22		Gene Expression, Embryonic Development, Organismal Development	44	27
	Cellular Function and Maintenance, Cancer, Organismal Injury and Abnormalities	30	19		Cancer, Connective Tissue Disorders, Organismal Injury and Abnormalities	42	26
	Cellular Growth and Proliferation, Tissue Development, Developmental Disorder	26	17		Cell Morphology, Connective Tissue Development and Function, Developmental Disorder	37	24
	Organismal Injury and Abnormalities, Cellular Movement, Embryonic Development	24	16		Infectious Diseases, Cardiovascular System Development and Function, Tissue Morphology	33	22
	Cell Cycle, Developmental Disorder, Hereditary Disorder	24	16		Cell Morphology, Endocrine System Development and Function, Organ Morphology	31	21
	Cell Morphology, Cellular Assembly and Organization, Cell Death and Survival	24	16		Cell Morphology, Cellular Function and Maintenance, Connective Tissue Disorders	27	19
	Cancer, Organismal Injury and Abnormalities, Reproductive System Disease	24	16		Molecular Transport, Cancer, Organismal Injury and Abnormalities	23	17
	Cellular Development, Hair and Skin Development and Function, Lymphoid Tissue Structure and Development	22	15		Cell-To-Cell Signaling and Interaction, Hematological System Development and Function, Hematopoiesis	23	17
	Embryonic Development, Nervous System Development and Function, Organ Development	22	15		Hematological System Development and Function, Tissue Morphology, Lymphoid Tissue Structure and Development	21	16
	Gene Expression, Lipid Metabolism, Molecular Transport	16	12		Lipid Metabolism, Molecular Transport, Small Molecule Biochemistry	19	15
	Cellular Assembly and Organization, Cellular Function and Maintenance, Hepatocellular Peroxisome Proliferation	16	12		Cellular Function and Maintenance, Nervous System Development and Function, Cellular Assembly and Organization	17	14
	Digestive System Development and Function, Embryonic Development, Organ Development	14	11		Cell Death and Survival, Developmental Disorder, Ophthalmic Disease	17	14
	Cell-To-Cell Signaling and Interaction, Nervous System Development and Function, Molecular Transport	14	11		Neurological Disease, Cellular Movement, Cellular Development	16	13
	Cell Signaling, Cancer, Endocrine System Disorders	13	10		Cancer, Molecular Transport, Small Molecule Biochemistry	14	12
	Cell Cycle, Humoral Immune Response, Protein Synthesis	9	8		Cell Death and Survival, Nervous System Development and Function, Embryonic Development	14	12
	Cellular Development, Cellular Growth and Proliferation, Developmental Disorder	2	1		Cell Death and Survival, Cellular Function and Maintenance, Cancer	14	12
	Nervous System Development and Function, Cell Morphology, Tissue Morphology	2	1		Cardiac Arrythmia, Cardiovascular Disease, Organismal Injury and Abnormalities	14	12
					Cellular Movement, Connective Tissue Development and Function, Connective Tissue Disorders	12	11
					Cancer, Organismal Injury and Abnormalities, Reproductive System Disease	12	11
					Cancer, Cellular Development, Cellular Growth and Proliferation	12	11
					Cell Morphology, Cellular Assembly and Organization, Cellular Development	7	7
					Developmental Disorder, Hereditary Disorder, Ophthalmic Disease	2	1
					DNA Replication, Recombination, and Repair, Gene Expression, Post-Translational Modification	2	1
Top Upstream Regulators (Top 10)	Upstream Regulator	p-value of overlap	Targets genes in dataset		Upstream Regulator	p-value of overlap	Targets genes in dataset
	LYL1	1.11e-06	5		TGFB1	2.67e-06	53
	ESR1	9.93e-06	32		TET2	3.81e-06	11
	FADD	3.93e-05	7		Alpha catenin	5.32e-06	11
	TP53	5.18e-05	32		CR1L	1.34e-05	6
	Progesterone	8.51e-05	18		Estrogen receptor	4.05e-05	14
	TNF	0.000107	35		TGFB3	5.52e-05	9
	Hydrogen peroxide	0.000115	15		HTT	5.78e-05	27
	IFNG	0.000131	29		CHI3L1	6.34e-05	5
	CA074-methyl ester	0.000143	3		SPDEF	0.000142	7
	15-deoxy-delta-12,14 -PGJ 2	0.000169	9		HRAS	0.000263	22
