# Supplementary material for: Enduring epigenetic landmarks define the cancer microenvironment
Source: HighWire-hosted journal article supplement (doi:10.1101/gr.229070.117), 2018-04-12
Supplement: Supplemental_Table_S6.xlsx [file Supplemental_Table_S6.xlsx]

## Sheet: Supplementary Table S6
Supplemental Table S6: Summary of the potential roles of candidate DE-DMRs in prostate cancer and/or the tumour microenvironment.
Functional roles of candidate DE-DMRs
Gene	Role in prostate cancer and/or tumour microenvironment
ABCB4 ATP binding cassette subfamily B member 4	• Upregulated by vitamin D3 in breast normal associated fibroblasts, but not CAFs (Campos et al. 2013).
CYP1B1 Cytochrome P450 family 1 subfamily B member 1	• Overexpressed in prostate cancer and regulated by DNA methylation (Gajjar et al. 2012). • Role in estrogen metabolism, meaning that genetic or transcriptomic alterations in the gene may lead to hormone-mediated carcinogenesis and altered response to chemotherapy (Gajjar et al. 2012). • Polymorphisms associated with prostate cancer susceptibility (Zhang et al. 2013). • Role in prostate tumorigen…
EBF1 Early B-cell factor 1	• Role in estrogen regulation at the genetic and protein level (Le et al. 2013). • Interaction partner of TET2 suggesting a sequence-specific mechanism for regulation of DNA methylation (Guilhamon et al. 2013).
EPHB6 EPH receptor B6	• Treatment of prostate cancer cell lines with demethylating agent 5-aza-2'-deoxycitidine increases EPHB6 expression (Fox et al. 2006).
ESR1 Estrogen receptor α	• Polymorphisms associated with prostate cancer risk (Ding et al. 2012; Fu et al. 2014). • Upregulates THBS2 prostate CAFs (Slavin et al. 2014). • Hypermethylated in prostate cancer tissue and cell lines (Yegnasubramanian et al. 2004). • In luminal breast cancer CAFs mediates tamoxifen resistance through IL-6-induced degradation (Sun et al. 2014). • Increased expression in prostate CAFs versus NP…
GDF6 Growth differentiation factor 6	• Part of the bone morphogenetic proteins (BMPs) in the TGFβ superfamily, which have been implicated in prostate cancer and bone metastasis (Ye et al. 2007). • Mesenchymal stem cells from breast cancer metastases exhibit decreased expression of GDF6 upon knockdown of DDR2, which regulates ECM synthesis and the migration and metastasis of breast cancer cells (Gonzalez et al. 2017).
GUCY1B3 Guanylate cyclase 1 soluble subunit beta	• Promotes angiogenesis (Saino et al. 2004). • Up-regulated by luteinizing hormone and estrogen (Johnson et al. 2006; Cui et al. 2011)
HOXD8 Homeobox D8	• Methylation of HOXD8 gene in urine samples predicts of prostate cancer disease progression in patients on active surveillance (Zhao et al. 2017). • Recurrently hypermethylated in prostate cancer (Massie et al. 2017).
IGFBP2 Insulin like growth factor binding protein 2	• Promotes proliferation, development of castration resistance and resistance to docetaxel in prostate cancer cells (Degraff et al. 2009; Uzoh et al. 2011). • IGFBP2 secreted by fibroblasts prevents anoikis of breast epithelial cells (Weigel et al. 2014)
ITGA11 Integrin subunit alpha 11	• Increased expression in CAFs and tumour stroma from non-small cell lung carcinoma (NSCLC) compared to normal fibroblasts and lung tissue (Navab et al. 2011). • Mediates interaction between matrix collagen and stromal fibroblasts to stimulate NSCLC cell growth (Zhu et al. 2007).
NEDD9 Neural precursor cell expressed, developmentally down-regulated 9	• Key mediator of TGFβ-induced epithelial-mesenchymal transition and cell motility in prostate cancer cells. Associated with prostate tumour aggressiveness and bone metastasis (Morimoto et al. 2014).
PITX2 Paired like homeodomain 2	• Hypermethylated in prostate cancer cell lines (Schayek et al. 2012). • Methylation associated with biochemical recurrence of prostate cancer (Chao et al. 2013; Vinarskaja et al. 2013). • Enhances cell motility through Wnt signalling, promoting metastasis (Vela et al. 2014). • Regulates androgen receptor and IGF-I receptor expression in prostate cancer (Schayek et al. 2012).
SDC2 Syndecan 2	• Overexpression associated with worse prognosis in prostate cancer (Contreras et al. 2010; Popovic et al. 2010). • May be involved in epithelial-mesenchymal transition and tumour progression in prostate cancer (Contreras et al. 2010). • Overexpressed in CAFs vs normal fibroblasts in oral squamous cell carcinoma (Costea et al. 2013).
THBS2 Thrombospondin 2	• Mediates signalling between estrogen receptor alpha and matrix metalloproteinase 3 in prostate CAFs to alter prostate cancer cell invasion (Slavin et al. 2014). • Association between THBS2 expression and microvessel density in ovarian cancer (Czekierdowski et al. 2008).
References
Campos LT, Brentani H, Roela RA, Katayama ML, Lima L, Rolim CF, Milani C, Folgueira MA, Brentani MM. 2013. Differences in transcriptional effects of 1alpha,25 dihydroxyvitamin D3 on fibroblasts associated to breast carcinomas and from paired normal breast tissues. J Steroid Biochem Mol Biol 133: 12-24.
Chao C, Chi M, Preciado M, Black MH. 2013. Methylation markers for prostate cancer prognosis: a systematic review. Cancer Causes Control 24: 1615-1641.
Contreras HR, Ledezma RA, Vergara J, Cifuentes F, Barra C, Cabello P, Gallegos I, Morales B, Huidobro C, Castellon EA. 2010. The expression of syndecan-1 and -2 is associated with Gleason score and epithelial-mesenchymal transition markers, E-cadherin and beta-catenin, in prostate cancer. Urol Oncol 28: 534-540.
Costea DE, Hills A, Osman AH, Thurlow J, Kalna G, Huang X, Pena Murillo C, Parajuli H, Suliman S, Kulasekara KK et al. 2013. Identification of two distinct carcinoma-associated fibroblast subtypes with differential tumor-promoting abilities in oral squamous cell carcinoma. Cancer Res 73: 3888-3901.
Cui J, Miner BM, Eldredge JB, Warrenfeltz SW, Dam P, Xu Y, Puett D. 2011. Regulation of gene expression in ovarian cancer cells by luteinizing hormone receptor expression and activation. BMC Cancer 11: 280.
Czekierdowski A, Czekierdowska S, Danilos J, Czuba B, Sodowski K, Sodowska H, Szymanski M, Kotarski J. 2008. Microvessel density and CpG island methylation of the THBS2 gene in malignant ovarian tumors. J Physiol Pharmacol 59 Suppl 4: 53-65.
Degraff DJ, Aguiar AA, Sikes RA. 2009. Disease evidence for IGFBP-2 as a key player in prostate cancer progression and development of osteosclerotic lesions. American journal of translational research 1: 115-130.
Ding X, Cui FM, Xu ST, Pu JX, Huang YH, Zhang JL, Wei XD, Hou JQ, Yan CY. 2012. Variants on ESR1 and their association with prostate cancer risk: a meta-analysis. Asian Pac J Cancer Prev 13: 3931-3936.
Ellem SJ, Taylor RA, Furic L, Larsson O, Frydenberg M, Pook D, Pedersen J, Cawsey B, Trotta A, Need E et al. 2014. A pro-tumourigenic loop at the human prostate tumour interface orchestrated by oestrogen, CXCL12 and mast cell recruitment. J Pathol 234: 86-98.
Fox BP, Tabone CJ, Kandpal RP. 2006. Potential clinical relevance of Eph receptors and ephrin ligands expressed in prostate carcinoma cell lines. Biochem Biophys Res Commun 342: 1263-1272.
Fu C, Dong WQ, Wang A, Qiu G. 2014. The influence of ESR1 rs9340799 and ESR2 rs1256049 polymorphisms on prostate cancer risk. Tumour Biol 35: 8319-8328.
Gajjar K, Martin-Hirsch PL, Martin FL. 2012. CYP1B1 and hormone-induced cancer. Cancer Lett 324: 13-30.
Gonzalez ME, Martin EE, Anwar T, Arellano-Garcia C, Medhora N, Lama A, Chen YC, Tanager KS, Yoon E, Kidwell KM et al. 2017. Mesenchymal Stem Cell-Induced DDR2 Mediates Stromal-Breast Cancer Interactions and Metastasis Growth. Cell reports 18: 1215-1228.
Guilhamon P, Eskandarpour M, Halai D, Wilson GA, Feber A, Teschendorff AE, Gomez V, Hergovich A, Tirabosco R, Fernanda Amary M et al. 2013. Meta-analysis of IDH-mutant cancers identifies EBF1 as an interaction partner for TET2. Nature communications 4: 2166.
Johnson ML, Grazul-Bilska AT, Redmer DA, Reynolds LP. 2006. Effects of estradiol-17beta on expression of mRNA for seven angiogenic factors and their receptors in the endometrium of ovariectomized (OVX) ewes. Endocrine 30: 333-342.
Le TP, Sun M, Luo X, Kraus WL, Greene GL. 2013. Mapping ERbeta genomic binding sites reveals unique genomic features and identifies EBF1 as an ERbeta interactor. PLoS One 8: e71355.
Massie CE, Mills IG, Lynch AG. 2017. The importance of DNA methylation in prostate cancer development. J Steroid Biochem Mol Biol 166: 1-15.
Morimoto K, Tanaka T, Nitta Y, Ohnishi K, Kawashima H, Nakatani T. 2014. NEDD9 crucially regulates TGF-beta-triggered epithelial-mesenchymal transition and cell invasion in prostate cancer cells: involvement in cancer progressiveness. Prostate 74: 901-910.
Navab R, Strumpf D, Bandarchi B, Zhu CQ, Pintilie M, Ramnarine VR, Ibrahimov E, Radulovich N, Leung L, Barczyk M et al. 2011. Prognostic gene-expression signature of carcinoma-associated fibroblasts in non-small cell lung cancer. Proc Natl Acad Sci U S A 108: 7160-7165.
Popovic A, Demirovic A, Spajic B, Stimac G, Kruslin B, Tomas D. 2010. Expression and prognostic role of syndecan-2 in prostate cancer. Prostate Cancer Prostatic Dis 13: 78-82.
Saino M, Maruyama T, Sekiya T, Kayama T, Murakami Y. 2004. Inhibition of angiogenesis in human glioma cell lines by antisense RNA from the soluble guanylate cyclase genes, GUCY1A3 and GUCY1B3. Oncol Rep 12: 47-52.
Schayek H, Bentov I, Jacob-Hirsch J, Yeung C, Khanna C, Helman LJ, Plymate SR, Werner H. 2012. Global methylation analysis identifies PITX2 as an upstream regulator of the androgen receptor and IGF-I receptor genes in prostate cancer. Horm Metab Res 44: 511-519.
Slavin S, Yeh CR, Da J, Yu S, Miyamoto H, Messing EM, Guancial E, Yeh S. 2014. Estrogen receptor alpha in cancer-associated fibroblasts suppresses prostate cancer invasion via modulation of thrombospondin 2 and matrix metalloproteinase 3. Carcinogenesis 35: 1301-1309.
Starsichova A, Hruba E, Slabakova E, Pernicova Z, Prochazkova J, Pencikova K, Seda V, Kabatkova M, Vondracek J, Kozubik A et al. 2012. TGF-beta1 signaling plays a dominant role in the crosstalk between TGF-beta1 and the aryl hydrocarbon receptor ligand in prostate epithelial cells. Cell Signal 24: 1665-1676.
Uzoh CC, Holly JM, Biernacka KM, Persad RA, Bahl A, Gillatt D, Perks CM. 2011. Insulin-like growth factor-binding protein-2 promotes prostate cancer cell growth via IGF-dependent or -independent mechanisms and reduces the efficacy of docetaxel. Br J Cancer 104: 1587-1593.
Vela I, Morrissey C, Zhang X, Chen S, Corey E, Strutton GM, Nelson CC, Nicol DL, Clements JA, Gardiner EM. 2014. PITX2 and non-canonical Wnt pathway interaction in metastatic prostate cancer. Clin Exp Metastasis 31: 199-211.
Vinarskaja A, Schulz WA, Ingenwerth M, Hader C, Arsov C. 2013. Association of PITX2 mRNA down-regulation in prostate cancer with promoter hypermethylation and poor prognosis. Urol Oncol 31: 622-627.
Weigel KJ, Jakimenko A, Conti BA, Chapman SE, Kaliney WJ, Leevy WM, Champion MM, Schafer ZT. 2014. CAF-secreted IGFBPs regulate breast cancer cell anoikis. Mol Cancer Res 12: 855-866.
Ye L, Lewis-Russell JM, Kyanaston HG, Jiang WG. 2007. Bone morphogenetic proteins and their receptor signaling in prostate cancer. Histol Histopathol 22: 1129-1147.
Yegnasubramanian S, Kowalski J, Gonzalgo ML, Zahurak M, Piantadosi S, Walsh PC, Bova GS, De Marzo AM, Isaacs WB, Nelson WG. 2004. Hypermethylation of CpG islands in primary and metastatic human prostate cancer. Cancer Res 64: 1975-1986.
Zhang H, Li L, Xu Y. 2013. CYP1B1 polymorphisms and susceptibility to prostate cancer: a meta-analysis. PLoS One 8: e68634.
Zhao F, Olkhov-Mitsel E, van der Kwast T, Sykes J, Zdravic D, Venkateswaran V, Zlotta AR, Loblaw A, Fleshner NE, Klotz L et al. 2017. Urinary DNA Methylation Biomarkers for Noninvasive Prediction of Aggressive Disease in Patients with Prostate Cancer on Active Surveillance. J Urol 197: 335-341.
Zhu CQ, Popova SN, Brown ER, Barsyte-Lovejoy D, Navab R, Shih W, Li M, Lu M, Jurisica I, Penn LZ et al. 2007. Integrin alpha 11 regulates IGF2 expression in fibroblasts to enhance tumorigenicity of human non-small-cell lung cancer cells. Proc Natl Acad Sci U S A 104: 11754-11759.
