# Supplementary material for: Enduring epigenetic landmarks define the cancer microenvironment
Source: HighWire-hosted journal article supplement (doi:10.1101/gr.229070.117), 2018-04-12
Supplement: Supplemental_Table_S7.xlsx [file Supplemental_Table_S7.xlsx]

## Sheet: Supplementary Table S7
Supplemental Table S7: Validation of DNA methylation differences between CAFs and NPFs in an independent cohort of 10 patients.
Targeted bisulfite sequencing of DMRs nominated from WGBS analysis
Gene Symbol	Genomic position of amplicon (hg19)	Average reads per sample	Methylation CAF (Mean +/- SD)	Methylation NPF (Mean +/- SD)	Δ-meth	Paired T-test T-statistic	Paired T-test P-value	ROC analysis AUC
ABCB4	chr7:87,103,869-87,104,079	8527.19	12.1 (± 12.1)	32.8 (± 10)	-20.7218	-4.60481	0.000640863	0.89
CYP1B1	chr2:38,304,625-38,304,839	7700.62	33.9 (± 17.7)	66.8 (± 16.3)	-32.8722	-4.92823	0.000407659	0.93
EBF1	chr5:158,532,581-158,532,743	2463.48	80.4 (± 22.6)	39.4 (± 19.4)	41.0029	4.86666	0.000443806	0.91
EPHB6	chr7:142,553,616-142,553,847	29441.6	29 (± 14.7)	11.7 (± 9.3)	17.2686	3.28518	0.00472542	0.86
ESR1	chr6:152,013,019-152,013,267	24692.3	35.2 (± 25.5)	73 (± 8.5)	-37.797	-5.29571	0.000248332	0.88
GDF6	chr8:97,167,743-97,167,904	3018.05	60.6 (± 13.4)	28.6 (± 9.7)	31.9548	7.26547	2.3684e-05	0.96
GUCY1B3	chr4:156,679,691-156,679,939	42419.4	77 (± 13.6)	92.4 (± 2)	-15.4089	-3.64225	0.002691	0.84
HOXD8	chr2:176,997,720-176,997,958	10412	60.7 (± 13.1)	24.8 (± 8.9)	35.8747	7.98716	1.12104e-05	1
IGFBP2	chr2:217,500,900-217,501,147	15075	25.7 (± 26.3)	55.7 (± 23.3)	-29.9693	-2.51324	0.016567	0.81
ITGA11	chr15:68,723,042-68,723,278	15040.6	57.3 (± 15.5)	84.9 (± 6.5)	-27.6716	-4.61276	0.000633663	0.97
NEDD9	chr6:11,278,373-11,278,600	9563.24	72.9 (± 14.3)	85.3 (± 11.6)	-12.4256	-1.99805	0.0383966	0.82
PITX2	chr4:111,539,984-111,540,212	13214.3	25 (± 13.6)	74.9 (± 16.3)	-49.876	-11.8936	4.15336e-07	0.99
SDC2	chr8:97,602,524-97,602,722	7212.62	8 (± 4.3)	36.4 (± 25.3)	-28.3341	-3.69231	0.00248976	0.86
THBS2	chr6:169,652,038-169,652,212	2701.52	19.4 (± 18.1)	59.5 (± 21.8)	-40.0972	-4.50191	0.00074243	0.92
