# Supplementary material for: Enduring epigenetic landmarks define the cancer microenvironment
Source: HighWire-hosted journal article supplement (doi:10.1101/gr.229070.117), 2018-04-12
Supplement: Supplemental_Table_S8.xlsx [file Supplemental_Table_S8.xlsx]

## Sheet: Supplementary Table S8
Supplemental Table S8: Common differentially methylated regions between prostatic fibroblasts and epithelial cells based on whole genome bisulfite sequencing
Common DMRs in NPFs vs CAFs and PreC vs LNCaP
# CAF-NPF DMRs that are similarly differentially methylated in LNCaP compared to PrEC with >30% change
# The closest gene and closest protein-coding gene are shown for each DMR.
1 For the distance of DMRs to the TSS, positive values indicate that the DMR lies downstream of the TSS, while negative values indicate that the DMR lies upstream of the TSS.
2 areaStat is the sum of the t-statistics for all CpGs within the DMR
3 maxStat is the largest t-statistic of the CpGs within the DMR
4 tstat.sd is the standard deviation of the CpGs within the DMR, across the 2 groups
Hypermethylated DMRs
Chromosome	Start	End	Width	Distance to Closest TSS 1	Closest Transcript Type	Closest Gene Name	Closest Gene ID	Distance to Closest Protein-coding TSS 1	Closest Protein-coding Gene Name	Closest Protein-coding Gene ID	NPF Mean Methylation	CAF Mean Methylation	Mean Difference % (Fibroblasts)	PrEC Mean Methylation	LNCaP Mean Methylation	Mean Difference (Epithelial) (%)	areaStat 2	maxStat 3	tstat.sd 4
chr1	842039	842689	651	1824	lincRNA	RP11-54O7.16	ENSG00000272438	-17570	SAMD11	ENSG00000187634	42.06	60.5192	18.4593	34.3972	86.0324	51.6351	67.2232	3.54076	0.0552368
chr1	8272230	8272440	211	3497	lincRNA	RP11-431K24.3	ENSG00000227634	-105445	SLC45A1	ENSG00000162426	58.0451	73.9251	15.88	2.10013	68.0267	65.9266	28.7119	3.24129	0.0521287
chr1	12192849	12193536	688	6857	processed_transcript	TNFRSF8	ENSG00000120949	6892	TNFRSF8	ENSG00000120949	43.7546	68.9821	25.2275	25.9607	72.3758	46.4151	68.473	4.90184	0.0618559
chr1	15528492	15528633	142	-9150	processed_pseudogene	RP1-21O18.3	ENSG00000215720	-30678	C1orf195	ENSG00000204464	35.3647	48.2066	12.8419	11.7245	61.2906	49.5661	12.1828	3.0882	0.0522683
chr1	15743598	15744163	566	6836	protein_coding	EFHD2	ENSG00000142634	6836	EFHD2	ENSG00000142634	39.6351	53.2451	13.6101	13.6876	82.9573	69.2697	51.8611	3.66778	0.0539936
chr1	15753696	15754172	477	-10762	protein_coding	CTRC	ENSG00000162438	-10762	CTRC	ENSG00000162438	26.7373	43.631	16.8937	50.0581	89.9679	39.9098	45.4449	4.85257	0.0528128
chr1	16499612	16500274	663	13850	antisense	RP11-276H7.3	ENSG00000224621	-17029	EPHA2	ENSG00000142627	36.4996	62.1954	25.6959	18.2243	57.9899	39.7656	76.3087	5.45144	0.0537729
chr1	17307873	17308206	334	-542	protein_coding	MFAP2	ENSG00000117122	-542	MFAP2	ENSG00000117122	54.6975	74.7662	20.0687	19.8051	64.5984	44.7933	24.1104	3.6406	0.0551955
chr1	23882632	23883030	399	2535	processed_transcript	ID3	ENSG00000117318	3254	ID3	ENSG00000117318	10.6909	37.106	26.4151	8.3962	44.2093	35.8131	35.7898	4.76524	0.0557341
chr1	24469102	24469906	805	0	protein_coding	IL22RA1	ENSG00000142677	0	IL22RA1	ENSG00000142677	28.978	50.7037	21.7257	11.0143	46.1937	35.1794	86.5125	4.1647	0.0563588
chr1	33266753	33267230	478	-2937	processed_transcript	YARS	ENSG00000134684	-15137	S100PBP	ENSG00000116497	44.0942	67.226	23.1318	56.2555	89.9435	33.688	32.2565	3.78172	0.0605756
chr1	33454785	33455177	393	2108	antisense	RP1-117O3.2	ENSG00000236065	15516	FKSG48	ENSG00000267885	51.2009	70.1019	18.901	37.4236	73.5745	36.1509	15.4072	3.11174	0.0547367
chr1	38513756	38513890	135	658	lincRNA	RP5-884C9.2	ENSG00000224592	-1305	POU3F1	ENSG00000185668	22.8019	46.8663	24.0644	29.7185	87.3288	57.6104	17.2927	4.96841	0.0521287
chr1	46149925	46150233	309	1974	protein_coding	GPBP1L1	ENSG00000159592	1974	GPBP1L1	ENSG00000159592	44.7963	64.4368	19.6405	21.4824	56.8377	35.3553	11.851	4.42945	0.0530702
chr1	47078935	47079028	94	1776	protein_coding	MOB3C	ENSG00000142961	1776	MOB3C	ENSG00000142961	36.896	54.3392	17.4432	46.785	84.8587	38.0737	22.2383	3.27283	0.0602352
chr1	52834756	52834950	195	406	processed_pseudogene	PLA2G12AP1	ENSG00000224680	-2890	CC2D1B	ENSG00000154222	43.0612	63.2231	20.1618	5.49552	44.4129	38.9173	13.9997	3.74553	0.0547907
chr1	54587962	54588100	139	17421	processed_transcript	CDCP2	ENSG00000157211	17993	AL161915.1	ENSG00000212670	26.8739	46.8568	19.9829	21.5506	74.9922	53.4416	33.5689	3.45521	0.0537162
chr1	54822058	54822199	142	291	processed_transcript	SSBP3	ENSG00000157216	48977	SSBP3	ENSG00000157216	55.9365	75.4533	19.5168	53.4102	88.4096	34.9994	24.3241	3.06265	0.0574358
chr1	54952650	54952901	252	-17439	miRNA	AC099796.1	ENSG00000265404	-60999	ACOT11	ENSG00000162390	40.4901	66.3306	25.8405	23.5333	79.2474	55.7142	26.431	3.39324	0.0715218
chr1	109420942	109421111	170	911	protein_coding	GPSM2	ENSG00000121957	911	GPSM2	ENSG00000121957	6.81958	29.632	22.8124	1.99546	88.3991	86.4037	19.9328	5.07611	0.0560467
chr1	109421497	109421676	180	1466	protein_coding	GPSM2	ENSG00000121957	1466	GPSM2	ENSG00000121957	34.6002	66.5266	31.9264	15.8289	92.4951	76.6663	16.7737	6.04314	0.0560969
chr1	109824795	109825014	220	26	retained_intron	PSRC1	ENSG00000134222	-493	PSRC1	ENSG00000134222	16.1561	33.7109	17.5547	19.9876	63.2707	43.2831	20.5333	3.74234	0.0521287
chr1	120189522	120189575	54	820	protein_coding	ZNF697	ENSG00000143067	820	ZNF697	ENSG00000143067	33.7059	54.2155	20.5096	35.6782	71.3047	35.6264	13.204	3.42373	0.0573135
chr1	120256620	120256898	279	2090	processed_transcript	PHGDH	ENSG00000092621	2109	PHGDH	ENSG00000092621	43.1695	63.5412	20.3717	11.9725	81.5093	69.5368	14.0752	4.29849	0.0534889
chr1	153894021	153894095	75	1355	protein_coding	GATAD2B	ENSG00000143614	1355	GATAD2B	ENSG00000143614	14.3477	30.4226	16.0749	16.6845	90.167	73.4824	9.23651	3.1729	0.0549152
chr1	156896916	156897130	215	-23	processed_transcript	LRRC71	ENSG00000160838	6473	LRRC71	ENSG00000160838	41.2007	66.3143	25.1136	30.5443	67.1	36.5557	17.0015	3.61672	0.0585204
chr1	161575992	161576063	72	-17	unprocessed_pseudogene	HSPA7	ENSG00000225217	10648	FCGR2C	ENSG00000244682	14.0993	32.2102	18.1108	40.5153	79.8783	39.363	26.6815	3.58767	0.0598569
chr1	172504310	172504863	554	1786	retained_intron	SUCO	ENSG00000094975	1952	SUCO	ENSG00000094975	16.0309	38.1756	22.1447	22.441	56.8998	34.4587	16.0766	4.45082	0.0543816
chr1	201709765	201709860	96	768	protein_coding	NAV1	ENSG00000134369	768	NAV1	ENSG00000134369	15.8285	33.0436	17.2151	0.214723	66.3258	66.1111	15.2394	3.06447	0.0581422
chr1	203045221	203045340	120	89	processed_transcript	PPFIA4	ENSG00000143847	9823	MYOG	ENSG00000122180	27.4697	48.7408	21.2711	15.4429	72.563	57.1201	29.4278	3.41967	0.0533213
chr1	221054337	221054499	163	0	protein_coding	HLX	ENSG00000136630	0	HLX	ENSG00000136630	14.1388	38.7004	24.5616	12.2967	85.8182	73.5215	28.6618	3.26664	0.0558234
chr1	221058030	221058079	50	3445	protein_coding	HLX	ENSG00000136630	3445	HLX	ENSG00000136630	58.8599	86.8219	27.962	11.7223	90.8438	79.1214	12.151	3.07593	0.0610773
chr1	225837005	225838930	1926	1487	protein_coding	ENAH	ENSG00000154380	1487	ENAH	ENSG00000154380	19.5862	66.8322	47.246	32.0219	87.7126	55.6907	195.819	6.77642	0.0694054
chr1	228136768	228136912	145	-1168	protein_coding	WNT9A	ENSG00000143816	-1168	WNT9A	ENSG00000143816	39.3602	56.7403	17.3801	53.48	83.935	30.455	16.2992	3.36846	0.054119
chr2	9373977	9374345	369	27082	protein_coding	ASAP2	ENSG00000151693	27082	ASAP2	ENSG00000151693	57.2712	72.5444	15.2732	51.2308	81.8417	30.6109	29.1075	3.30069	0.0607843
chr2	10336614	10337025	412	-3816	miRNA	MIR4261	ENSG00000265418	55104	C2orf48	ENSG00000163009	63.1169	86.2875	23.1706	51.3357	85.7731	34.4374	48.7727	3.62471	0.0613695
chr2	43385484	43386565	1082	-55654	lincRNA	AC093609.1	ENSG00000230587	67182	ZFP36L2	ENSG00000152518	35.464	61.9827	26.5187	6.68371	62.0812	55.3975	100.189	5.16488	0.0570834
chr2	97075716	97075874	159	45497	protein_coding	NCAPH	ENSG00000121152	45497	NCAPH	ENSG00000121152	21.507	39.7626	18.2556	18.8864	62.7603	43.8738	24.3015	3.06078	0.0546522
chr2	97194192	97194432	241	3610	antisense	RP11-363D14.1	ENSG00000235480	-8053	ARID5A	ENSG00000196843	39.6627	64.699	25.0363	30.7904	70.8988	40.1084	35.3333	4.20104	0.0592469
chr2	106682828	106682900	73	571	protein_coding	C2orf40	ENSG00000119147	571	C2orf40	ENSG00000119147	35.5952	59.7868	24.1915	29.1761	63.8824	34.7062	19.1872	3.28863	0.0588623
chr2	127842523	127842874	352	-20018	processed_transcript	BIN1	ENSG00000136717	21702	BIN1	ENSG00000136717	30.4368	54.3488	23.912	27.1537	62.0162	34.8625	27.1036	3.61732	0.0616148
chr2	171567683	171568374	692	2702	protein_coding	LINC01124	ENSG00000222033	2702	LINC01124	ENSG00000222033	22.175	47.0614	24.8863	9.71829	62.4893	52.771	64.6389	4.59354	0.060711
chr2	176961140	176961237	98	-3220	protein_coding	HOXD12	ENSG00000170178	-3220	HOXD12	ENSG00000170178	4.40839	38.2471	33.8387	7.00841	70.2949	63.2865	13.7135	3.64535	0.0727592
chr2	197037181	197037230	50	-881	protein_coding	STK17B	ENSG00000081320	-881	STK17B	ENSG00000081320	28.7191	45.222	16.5029	49.0416	90.0212	40.9796	10.382	3.51922	0.0563662
chr2	227665297	227665381	85	434	lincRNA	RP11-395N3.2	ENSG00000272622	-821	IRS1	ENSG00000169047	5.2203	23.3687	18.1484	0.457827	81.5733	81.1155	12.708	3.33014	0.0570665
chr2	238581924	238581991	68	-10055	processed_transcript	LRRFIP1	ENSG00000124831	-18796	LRRFIP1	ENSG00000124831	59.1725	81.5017	22.3292	9.46977	83.138	73.6683	15.0863	3.0313	0.0685453
chr2	240035582	240036058	477	-5781	retained_intron	HDAC4	ENSG00000068024	26610	HDAC4	ENSG00000068024	21.9629	45.9019	23.939	29.3042	72.4691	43.1649	36.3083	3.46475	0.0688171
chr2	241897442	241897606	165	1164	antisense	AC104809.4	ENSG00000233392	-1191	AC104809.3	ENSG00000226321	48.1589	73.8339	25.6749	21.175	69.9055	48.7304	30.6657	3.10849	0.063962
chr2	241930655	241930869	215	-5165	antisense	AC104809.2	ENSG00000223991	-7385	SNED1	ENSG00000162804	46.6066	65.2996	18.693	40.4974	71.1291	30.6317	13.1621	3.4838	0.0622016
chr3	4867340	4868477	1138	4555	processed_transcript	AC018816.3	ENSG00000235978	58994	AC018816.3	ENSG00000235978	38.2531	61.4795	23.2264	16.6419	56.3084	39.6665	91.8193	3.87518	0.0577638
chr3	11677935	11678156	222	-2789	processed_transcript	VGLL4	ENSG00000144560	7241	VGLL4	ENSG00000144560	26.3381	46.6438	20.3057	26.8815	61.2323	34.3508	9.22352	3.15044	0.0621488
chr3	12559164	12559290	127	2958	snRNA	RNU6-377P	ENSG00000251774	-12079	TSEN2	ENSG00000154743	37.3276	58.8162	21.4886	47.8162	80.7944	32.9783	17.8211	3.58338	0.0567273
chr3	122888209	122888548	340	19022	nonsense_mediated_decay	PDIA5	ENSG00000065485	-32256	SEC22A	ENSG00000121542	59.7534	77.7982	18.0448	51.3996	84.5704	33.1709	13.7659	3.81672	0.0547234
chr3	125898467	125898783	317	0	protein_coding	ALDH1L1	ENSG00000144908	0	ALDH1L1	ENSG00000144908	17.9667	36.1915	18.2248	9.25042	62.8497	53.5993	52.9295	3.95469	0.0586688
chr3	142666489	142666543	55	9406	antisense	RP11-372E1.4	ENSG00000243818	14548	PAQR9	ENSG00000188582	31.2194	46.7767	15.5573	32.6635	81.4498	48.7862	15.0403	3.01174	0.0556547
chr3	159557493	159557888	396	0	retained_intron	SCHIP1	ENSG00000151967	0	SCHIP1	ENSG00000151967	66.3525	86.2642	19.9117	43.3836	74.3568	30.9731	54.0366	3.68094	0.0600646
chr3	159942159	159942453	295	632	antisense	IL12A-AS1	ENSG00000244040	-969	C3orf80	ENSG00000180044	48.0864	67.1313	19.0449	28.4587	84.6014	56.1428	38.8639	3.35547	0.0651492
chr3	197120903	197121381	479	-54480	snoRNA	snoU13	ENSG00000238491	-94731	DLG1	ENSG00000075711	42.8099	66.6272	23.8173	23.0489	69.5174	46.4685	61.2785	4.66943	0.0547461
chr4	8268699	8269075	377	-2416	protein_coding	HTRA3	ENSG00000170801	-2416	HTRA3	ENSG00000170801	37.3484	60.5387	23.1903	27.8358	60.8331	32.9973	49.8283	3.42187	0.069924
chr4	39044577	39044982	406	-1676	protein_coding	KLHL5	ENSG00000109790	-1676	KLHL5	ENSG00000109790	18.2424	40.3413	22.099	20.0927	78.1523	58.0597	31.1296	3.65741	0.0683987
chr4	103350341	103350667	327	1738	lincRNA	RP11-499E18.1	ENSG00000248161	-71818	NFKB1	ENSG00000109320	32.4311	61.5236	29.0925	24.1152	57.3704	33.2552	14.5808	5.24368	0.0595831
chr4	103351004	103351075	72	1330	lincRNA	RP11-499E18.1	ENSG00000248161	-71410	NFKB1	ENSG00000109320	14.2778	43.1603	28.8825	11.5857	44.8576	33.2719	33.7028	4.91063	0.0595831
chr4	142558507	142559149	643	406	protein_coding	IL15	ENSG00000164136	406	IL15	ENSG00000164136	24.5201	55.2408	30.7207	52.7857	85.5532	32.7674	54.3796	7.81547	0.0578402
chr4	146860717	146860934	218	-929	protein_coding	ZNF827	ENSG00000151612	-929	ZNF827	ENSG00000151612	17.3805	50.7572	33.3767	37.5367	79.3285	41.7918	16.7499	6.42249	0.061833
chr4	152329013	152329364	352	622	lincRNA	RP11-610P16.1	ENSG00000251611	-1033	FAM160A1	ENSG00000164142	31.5184	51.4337	19.9153	0.97332	87.155	86.1817	72.8116	3.66067	0.0579532
chr4	152595380	152595502	123	-132	antisense	RP11-164P12.3	ENSG00000251455	86634	PET112	ENSG00000059691	41.2369	58.4857	17.2488	19.0904	57.4115	38.3211	9.27345	3.14948	0.0582289
chr5	220077	220381	305	1590	retained_intron	SDHA	ENSG00000073578	1643	SDHA	ENSG00000073578	13.5727	34.4359	20.8632	44.0213	74.9431	30.9218	18.4879	4.00145	0.0561996
chr5	7849503	7849806	304	1457	protein_coding	C5orf49	ENSG00000215217	1457	C5orf49	ENSG00000215217	36.0512	56.6192	20.568	35.7119	80.4615	44.7496	22.4536	4.49484	0.0575658
chr5	10138385	10139187	803	1134	lincRNA	CTD-2199O4.1	ENSG00000249807	110810	FAM173B	ENSG00000150756	37.6581	54.3178	16.6597	47.8849	84.4095	36.5246	79.5493	3.72951	0.0559792
chr5	10563178	10563295	118	-1146	nonsense_mediated_decay	ANKRD33B	ENSG00000164236	-1284	ANKRD33B	ENSG00000164236	40.6698	57.4321	16.7623	27.1633	90.8646	63.7013	21.8148	3.18806	0.0607591
chr5	14405999	14406732	734	0	retained_intron	TRIO	ENSG00000038382	-81824	TRIO	ENSG00000038382	37.9599	56.6233	18.6634	40.7055	88.8964	48.1909	75.8579	4.54997	0.0593092
chr5	16492962	16493425	464	-14787	nonsense_mediated_decay	FAM134B	ENSG00000154153	15681	FAM134B	ENSG00000154153	49.4617	71.2037	21.7421	27.4445	65.1358	37.6913	31.3529	3.24517	0.0622565
chr5	16666003	16667019	1017	-42798	misc_RNA	Y_RNA	ENSG00000201370	-48835	FAM134B	ENSG00000154153	53.6469	74.333	20.6861	27.969	59.0169	31.048	84.2999	3.53267	0.058789
chr5	53604641	53604941	301	1303	processed_transcript	ARL15	ENSG00000185305	1461	ARL15	ENSG00000185305	43.0422	64.0544	21.0122	34.6992	90.5746	55.8753	12.0245	4.46481	0.0579331
chr5	102089760	102089883	124	74	protein_coding	PAM	ENSG00000145730	74	PAM	ENSG00000145730	42.9146	60.7832	17.8687	25.4853	86.6046	61.1193	22.4404	3.29674	0.0592196
chr5	112538252	112540106	1855	0	processed_transcript	MCC	ENSG00000171444	30267	MCC	ENSG00000171444	46.1461	82.4128	36.2667	10.811	75.4216	64.6106	254.323	7.2816	0.0591562
chr5	112825132	112825266	135	-604	protein_coding	MCC	ENSG00000171444	-604	MCC	ENSG00000171444	7.69689	29.0706	21.3737	4.80999	64.4603	59.6503	10.5567	3.69905	0.0598094
chr5	141060549	141060750	202	-150	protein_coding	ARAP3	ENSG00000120318	-150	ARAP3	ENSG00000120318	41.2545	62.8942	21.6397	10.6844	62.1195	51.4351	22.7043	3.98124	0.0571683
chr5	153576811	153577021	211	6253	processed_transcript	GALNT10	ENSG00000164574	6476	GALNT10	ENSG00000164574	42.9165	65.9166	23	26.9473	69.1038	42.1564	12.8051	3.42961	0.0615009
chr5	177954175	177955332	1158	33906	protein_coding	COL23A1	ENSG00000050767	33906	COL23A1	ENSG00000050767	18.5936	43.9101	25.3165	18.4893	56.9365	38.4472	108.221	5.17662	0.058712
chr6	1334842	1335278	437	22166	protein_coding	FOXQ1	ENSG00000164379	22166	FOXQ1	ENSG00000164379	38.0642	60.8454	22.7812	17.2942	79.2692	61.975	51.4183	4.56952	0.0674848
chr6	1335620	1336426	807	22944	protein_coding	FOXQ1	ENSG00000164379	22944	FOXQ1	ENSG00000164379	45.2849	65.2429	19.958	17.2423	68.1029	50.8606	65.245	4.46372	0.0642361
chr6	3061922	3062010	89	-2214	processed_transcript	RIPK1	ENSG00000137275	-6647	RIPK1	ENSG00000137275	69.2921	87.6339	18.3418	52.6639	90.9677	38.3039	13.9724	3.52826	0.0567518
chr6	3229867	3230421	555	-1215	nonsense_mediated_decay	PSMG4	ENSG00000180822	-1619	PSMG4	ENSG00000180822	7.96766	31.2642	23.2966	17.625	49.8185	32.1936	104.948	4.35372	0.0555897
chr6	10749912	10750017	106	13	nonsense_mediated_decay	TMEM14B	ENSG00000137210	1847	TMEM14B	ENSG00000137210	68.0347	88.5363	20.5016	58.6591	90.1377	31.4786	10.5022	3.52737	0.0582565
chr6	11213987	11214942	956	17948	protein_coding	NEDD9	ENSG00000111859	17948	NEDD9	ENSG00000111859	60.8838	79.8892	19.0054	47.4757	82.4276	34.9519	49.8149	3.62815	0.0537969
chr6	14785034	14785321	288	138267	snRNA	RNU6-793P	ENSG00000206960	-461205	JARID2	ENSG00000008083	35.5659	67.2401	31.6742	16.0482	72.9039	56.8557	57.3558	4.60195	0.063677
chr6	26127144	26127497	354	2712	protein_coding	HIST1H2AC	ENSG00000180573	2712	HIST1H2AC	ENSG00000180573	31.9582	55.9078	23.9496	14.422	49.5252	35.1032	12.1794	4.41609	0.0539304
chr6	33662188	33662587	400	886	protein_coding	SBP1	ENSG00000269490	886	SBP1	ENSG00000269490	28.8211	55.2167	26.3956	20.6498	73.6717	53.0219	59.6299	3.67037	0.0760803
chr6	37098949	37099091	143	-38887	protein_coding	PIM1	ENSG00000137193	-38887	PIM1	ENSG00000137193	35.0168	56.957	21.9402	28.1023	69.1191	41.0168	21.3477	3.08427	0.0591862
chr6	37667310	37667518	209	-227	protein_coding	MDGA1	ENSG00000112139	-227	MDGA1	ENSG00000112139	54.5986	74.1687	19.57	29.9245	68.7741	38.8496	40.3551	3.49082	0.0595129
chr6	41341883	41342721	839	18695	miRNA	AL136967.1	ENSG00000238867	38293	NCR2	ENSG00000096264	19.4749	56.0484	36.5735	6.13193	56.5087	50.3768	232.873	4.37746	0.0838386
chr6	41907087	41907252	166	-1082	processed_transcript	CCND3	ENSG00000112576	1211	CCND3	ENSG00000112576	29.2331	50.3742	21.1411	61.5219	92.8171	31.2952	15.6083	3.15116	0.0579263
chr6	41907514	41907781	268	682	protein_coding	CCND3	ENSG00000112576	682	CCND3	ENSG00000112576	21.8154	43.4908	21.6754	47.9643	93.3807	45.4163	9.62453	3.37446	0.0579263
chr6	42422219	42422626	408	-2429	protein_coding	TRERF1	ENSG00000124496	-2429	TRERF1	ENSG00000124496	30.6404	52.635	21.9946	51.4141	85.8536	34.4396	59.9902	4.90621	0.0537923
chr6	42869813	42870854	1042	-11258	protein_coding	C6orf226	ENSG00000221821	-11258	C6orf226	ENSG00000221821	31.966	66.1475	34.1815	8.01835	55.3677	47.3493	108.962	5.61795	0.0683956
chr6	43045360	43045686	327	807	protein_coding	PTK7	ENSG00000112655	807	PTK7	ENSG00000112655	32.7419	53.8199	21.078	9.45591	58.2985	48.8426	17.1508	3.6739	0.0566923
chr6	106547090	106547748	659	-266	sense_intronic	RP1-134E15.3	ENSG00000269919	274	PRDM1	ENSG00000057657	24.3221	47.5677	23.2457	20.2161	70.6071	50.3909	43.6423	3.95619	0.0601508
chr6	109272571	109273042	472	-7620	processed_transcript	ARMC2	ENSG00000118690	57148	SESN1	ENSG00000080546	63.1881	83.1924	20.0043	21.1905	64.3582	43.1678	48.19	3.31011	0.0561296
chr6	109760582	109760831	250	875	protein_coding	PPIL6	ENSG00000185250	875	PPIL6	ENSG00000185250	22.5266	46.1946	23.668	16.9364	91.6332	74.6969	59.3017	4.55269	0.0564111
chr6	146057648	146057826	179	482	lincRNA	RP3-466P17.2	ENSG00000270828	-487	EPM2A	ENSG00000112425	31.0886	47.8444	16.7558	39.9933	75.1362	35.1429	9.84726	3.42157	0.0576701
chr6	158463428	158463858	431	8905	nonsense_mediated_decay	SYNJ2	ENSG00000078269	24930	SYNJ2	ENSG00000078269	13.9457	41.7658	27.8202	14.8881	80.1109	65.2228	62.2146	4.2997	0.0797161
chr6	159236642	159236797	156	-2245	antisense	EZR-AS1	ENSG00000233893	2461	EZR	ENSG00000092820	48.2101	75.9866	27.7765	45.1754	94.5979	49.4225	13.3312	3.44854	0.0646643
chr6	159237124	159238111	988	-931	antisense	EZR-AS1	ENSG00000233893	1147	EZR	ENSG00000092820	37.9712	65.0182	27.0469	19.02	77.3642	58.3442	48.3249	3.7186	0.0618856
chr6	160115342	160115402	61	-981	protein_coding	SOD2	ENSG00000112096	-981	SOD2	ENSG00000112096	23.7049	40.9183	17.2134	3.99394	36.4701	32.4762	9.39874	3.22864	0.069016
chr6	168206577	168206618	42	-9037	nonsense_mediated_decay	C6orf123	ENSG00000146521	-9050	C6orf123	ENSG00000146521	43.5214	59.1737	15.6523	9.7481	67.6821	57.934	9.01268	3.00743	0.0602275
chr7	2069051	2069391	341	-48624	protein_coding	MAD1L1	ENSG00000002822	-48624	MAD1L1	ENSG00000002822	49.9632	74.4286	24.4654	24.9148	58.8357	33.9209	29.2236	3.44504	0.0714924
chr7	5367003	5367348	346	-1797	retained_intron	TNRC18	ENSG00000182095	5160	TNRC18	ENSG00000182095	40.8239	66.1283	25.3044	31.8451	81.4194	49.5743	19.7867	4.37116	0.0628802
chr7	20374072	20374274	203	2471	processed_transcript	ITGB8	ENSG00000105855	3325	ITGB8	ENSG00000105855	47.2492	77.0263	29.7772	37.8782	79.9394	42.0612	11.8578	4.11133	0.0596329
chr7	27279969	27279998	30	848	lincRNA	RP1-170O19.17	ENSG00000253308	-2165	EVX1	ENSG00000106038	38.8034	59.5594	20.756	49.9337	82.1408	32.2071	9.09749	3.03496	0.0624699
chr7	42258332	42258498	167	8821	protein_coding	GLI3	ENSG00000106571	8821	GLI3	ENSG00000106571	64.0847	76.7321	12.6475	37.1291	85.3219	48.1928	16.0827	3.28191	0.0578431
chr7	42258870	42259157	288	8162	protein_coding	GLI3	ENSG00000106571	8162	GLI3	ENSG00000106571	68.316	81.587	13.2711	31.9158	87.5791	55.6634	9.81735	3.41738	0.0592511
chr7	45612901	45613287	387	-451	protein_coding	ADCY1	ENSG00000164742	-451	ADCY1	ENSG00000164742	28.6866	60.3053	31.6187	33.9648	86.3271	52.3623	54.9439	4.25345	0.064049
chr7	100463490	100464384	895	-375	protein_coding	TRIP6	ENSG00000087077	-375	TRIP6	ENSG00000087077	57.9899	82.3159	24.326	0.970834	38.6584	37.6875	212.64	4.52441	0.0686937
chr7	101796643	101797380	738	7236	pseudogene	AC005086.1	ENSG00000230110	-120064	CUX1	ENSG00000257923	56.6296	81.1685	24.5389	34.7073	86.764	52.0567	54.9594	3.63889	0.0686927
chr7	105137023	105137966	944	-1228	retained_intron	PUS7	ENSG00000091127	10615	PUS7	ENSG00000091127	64.1238	86.9564	22.8326	43.3192	91.644	48.3248	32.475	4.40182	0.0587954
chr7	142553466	142553883	418	560	nonsense_mediated_decay	EPHB6	ENSG00000106123	642	EPHB6	ENSG00000106123	22.8628	41.3962	18.5334	6.17503	92.6389	86.4639	42.5383	4.47638	0.0589127
chr7	154996722	154997145	424	864	lincRNA	AC099552.3	ENSG00000228521	-6575	AC099552.4	ENSG00000217825	23.6059	42.0438	18.438	28.629	74.2312	45.6022	50.9504	4.04737	0.0557928
chr8	11722131	11722579	449	-2153	protein_coding	CTSB	ENSG00000164733	-2153	CTSB	ENSG00000164733	24.7739	43.5189	18.745	41.5995	83.8033	42.2038	29.5327	4.03696	0.0589523
chr8	22084739	22084799	61	406	protein_coding	PHYHIP	ENSG00000168490	406	PHYHIP	ENSG00000168490	17.648	35.8922	18.2441	19.3643	64.8194	45.4551	12.2082	3.09123	0.0625388
chr8	23381064	23381227	164	-5090	protein_coding	SLC25A37	ENSG00000147454	-5090	SLC25A37	ENSG00000147454	15.7507	33.2221	17.4713	32.3771	70.5869	38.2098	24.3848	3.07836	0.0589777
chr8	25936287	25936908	622	-33373	protein_coding	EBF2	ENSG00000221818	-33373	EBF2	ENSG00000221818	44.1477	65.3111	21.1634	40.4986	77.0351	36.5364	45.7708	3.67468	0.0556908
chr8	26721306	26721766	461	726	protein_coding	ADRA1A	ENSG00000120907	726	ADRA1A	ENSG00000120907	13.7157	37.7175	24.0017	16.9498	71.0567	54.1069	48.3147	3.43912	0.0715081
chr8	30588665	30589264	600	-499	processed_transcript	UBXN8	ENSG00000104691	-3221	GSR	ENSG00000104687	34.1226	59.1301	25.0075	33.6993	81.3782	47.6789	68.96	3.5682	0.0747387
chr8	37424551	37425379	829	6666	lincRNA	RP11-150O12.5	ENSG00000254111	-127889	ZNF703	ENSG00000183779	40.3075	64.1673	23.8598	16.2617	51.7693	35.5076	44.003	3.55094	0.0618446
chr8	38796490	38796989	500	-11081	retained_intron	PLEKHA2	ENSG00000169499	-34693	HTRA4	ENSG00000169495	36.0505	53.915	17.8645	53.1742	87.4568	34.2826	38.0561	3.26316	0.0561343
chr8	49782065	49782466	402	-43952	processed_pseudogene	RP11-22C8.1	ENSG00000233109	51521	SNAI2	ENSG00000019549	43.4238	71.8447	28.4209	18.1699	53.8297	35.6597	19.2724	4.31419	0.0598862
chr8	49783652	49783907	256	-42511	processed_pseudogene	RP11-22C8.1	ENSG00000233109	50080	SNAI2	ENSG00000019549	17.1632	57.5683	40.4051	42.5875	83.9324	41.3449	46.4594	3.72482	0.0904437
chr8	56791576	56791649	74	-722	protein_coding	LYN	ENSG00000254087	-722	LYN	ENSG00000254087	26.0613	49.6428	23.5815	1.71667	78.6289	76.9122	13.2558	3.61244	0.0561608
chr8	74004343	74004855	513	651	protein_coding	SBSPON	ENSG00000164764	651	SBSPON	ENSG00000164764	20.3161	40.9026	20.5865	17.6886	76.7938	59.1051	42.8344	4.8721	0.0614487
chr9	14321190	14321346	157	990	protein_coding	NFIB	ENSG00000147862	990	NFIB	ENSG00000147862	9.78123	35.1519	25.3707	7.75224	58.4564	50.7041	18.9664	3.18731	0.0705364
chr9	34647503	34647775	273	382	nonsense_mediated_decay	GALT	ENSG00000213930	842	GALT	ENSG00000213930	35.8971	53.9586	18.0614	28.4685	66.7909	38.3224	16.2086	3.61286	0.0573794
chr9	35914445	35914515	71	4964	lincRNA	LINC00961	ENSG00000235387	8255	HRCT1	ENSG00000196196	65.4631	84.9576	19.4945	46.9595	76.9857	30.0262	9.73967	3.4275	0.0579077
chr9	38038625	38038882	258	29801	nonsense_mediated_decay	RP11-613M10.9	ENSG00000255872	30325	SHB	ENSG00000107338	37.5615	57.7333	20.1718	38.0879	83.7231	45.6352	15.6974	3.19398	0.0631191
chr9	38066113	38066930	818	1753	nonsense_mediated_decay	RP11-613M10.9	ENSG00000255872	2277	SHB	ENSG00000107338	38.6152	66.9604	28.3452	2.56926	75.0159	72.4467	40.88	4.85361	0.0566041
chr9	124888391	124888412	22	-5944	miRNA	MIR4478	ENSG00000266583	-32505	TTLL11	ENSG00000175764	23.4019	42.8661	19.4642	20.0245	57.6627	37.6382	9.03701	3.02347	0.0553741
chr9	128694469	128694619	151	66918	protein_coding	PBX3	ENSG00000167081	66918	PBX3	ENSG00000167081	53.7568	71.5381	17.7813	39.306	73.6574	34.3514	15.3359	3.0851	0.056705
chr9	129089972	129090337	366	830	processed_transcript	MVB12B	ENSG00000196814	843	MVB12B	ENSG00000196814	22.052	45.8943	23.8423	49.8833	93.4369	43.5536	26.2917	4.75729	0.056567
chr9	130668167	130668938	772	-479	processed_transcript	ST6GALNAC6	ENSG00000160408	-557	ST6GALNAC6	ENSG00000160408	55.3367	71.3235	15.9868	40.0096	82.3888	42.3792	64.0862	3.58942	0.053832
chr9	132500596	132500737	142	1164	pseudogene	AL590369.1	ENSG00000255824	14588	PTGES	ENSG00000148344	17.0315	39.3277	22.2962	17.7131	86.402	68.6889	13.2748	3.41565	0.0588052
chr9	133806889	133807061	173	-1522	protein_coding	FIBCD1	ENSG00000130720	-1522	FIBCD1	ENSG00000130720	65.687	83.4791	17.7921	11.0985	66.8122	55.7137	35.6726	3.28707	0.0560893
chr9	134609200	134609804	605	3120	protein_coding	RAPGEF1	ENSG00000107263	3120	RAPGEF1	ENSG00000107263	26.0729	43.9327	17.8598	22.4152	66.7493	44.3342	24.6174	3.75604	0.0551126
chr9	139002607	139002705	99	-1336	lincRNA	RP11-83N9.5	ENSG00000260193	7414	C9orf69	ENSG00000238227	33.4893	49.8797	16.3904	35.9405	79.993	44.0525	15.867	3.22594	0.0536673
chr9	139889630	139890134	505	64	processed_transcript	CLIC3	ENSG00000169583	1120	CLIC3	ENSG00000169583	28.0569	47.6999	19.643	52.7633	88.8404	36.077	143.592	3.68316	0.0546586
chr9	140011535	140011640	106	-1905	protein_coding	DPP7	ENSG00000176978	-1905	DPP7	ENSG00000176978	39.8162	60.088	20.2718	45.9068	78.1193	32.2126	18.7528	3.22195	0.0608168
chr10	588453	588536	84	41363	protein_coding	DIP2C	ENSG00000151240	41363	DIP2C	ENSG00000151240	38.3429	59.2136	20.8707	50.1387	80.4423	30.3037	9.1446	3.0837	0.0592243
chr10	3852435	3852604	170	-23537	lincRNA	RP11-464C19.2	ENSG00000230573	-24961	KLF6	ENSG00000067082	35.7995	54.7061	18.9066	11.0303	41.6039	30.5736	15.7072	3.16459	0.0631368
chr10	11911816	11912535	720	172	protein_coding	PROSER2	ENSG00000148426	172	PROSER2	ENSG00000148426	9.68751	51.4709	41.7834	58.6114	89.3063	30.6949	359.435	6.41847	0.0809243
chr10	32587186	32587557	372	-11279	processed_transcript	EPC1	ENSG00000120616	48555	EPC1	ENSG00000120616	41.8596	60.5162	18.6566	43.6167	89.6164	45.9996	16.6821	3.46417	0.0584033
chr10	70090753	70090787	35	-143	processed_transcript	HNRNPH3	ENSG00000096746	-1044	HNRNPH3	ENSG00000096746	20.7056	39.4026	18.6971	26.7965	81.6113	54.8148	13.405	3.3939	0.0598022
chr10	73019668	73021280	1613	-41682	antisense	UNC5B-AS1	ENSG00000237512	46983	UNC5B	ENSG00000107731	26.2245	63.3237	37.0992	30.1974	66.5004	36.303	145.55	5.4533	0.0625399
chr10	77155990	77156551	562	-4207	processed_transcript	ZNF503-AS2	ENSG00000237149	5038	ZNF503	ENSG00000165655	25.8502	68.9268	43.0766	19.3611	74.7775	55.4163	192.007	3.88377	0.105707
chr10	77157345	77157840	496	-2918	processed_transcript	ZNF503-AS2	ENSG00000237149	3749	ZNF503	ENSG00000165655	9.43399	44.7184	35.2845	5.53028	89.1708	83.6405	68.5194	4.18766	0.0820511
chr10	105879708	105879933	226	-1882	processed_transcript	SFR1	ENSG00000156384	-1882	SFR1	ENSG00000156384	12.2007	31.7795	19.5788	2.83567	75.2908	72.4551	12.8782	3.35083	0.0574493
chr10	134133454	134133844	391	11481	protein_coding	STK32C	ENSG00000165752	11481	STK32C	ENSG00000165752	24.1522	42.1952	18.0429	34.6066	77.3343	42.7277	19.4588	3.30609	0.0578321
chr11	2336490	2336892	403	-973	processed_transcript	TSPAN32	ENSG00000064201	12391	TSPAN32	ENSG00000064201	41.6129	65.0392	23.4263	23.3719	70.805	47.4331	51.6626	3.8335	0.0588527
chr11	34621852	34622831	980	-19808	processed_transcript	EHF	ENSG00000135373	-19826	EHF	ENSG00000135373	28.6027	46.1383	17.5356	8.28075	65.1914	56.9107	41.9044	3.30636	0.0567978
chr11	62573814	62573880	67	-39	protein_coding	NXF1	ENSG00000162231	-39	NXF1	ENSG00000162231	45.3828	62.8813	17.4985	42.6474	86.4568	43.8094	9.34355	3.19471	0.0582539
chr11	62621174	62621258	85	0	snoRNA	SNHG1	ENSG00000255717	-2259	SLC3A2	ENSG00000168003	38.5161	56.957	18.4409	7.8037	73.9488	66.1451	9.27975	3.09883	0.0565463
chr11	67138872	67139346	475	1708	processed_transcript	AP003419.11	ENSG00000256514	1861	CLCF1	ENSG00000175505	25.995	55.0836	29.0886	43.8279	78.4021	34.5741	25.7145	4.16724	0.0756281
chr11	67815229	67815863	635	287	retained_intron	TCIRG1	ENSG00000110719	-1649	TCIRG1	ENSG00000110719	60.5465	81.8807	21.3342	54.4467	86.526	32.0793	108.4	5.88429	0.0558503
chr11	68095405	68095766	362	15252	nonsense_mediated_decay	LRP5	ENSG00000162337	15327	LRP5	ENSG00000162337	42.5115	62.8299	20.3183	22.2521	74.3884	52.1363	42.6399	3.77655	0.0626726
chr11	86510363	86510915	553	-366	protein_coding	PRSS23	ENSG00000150687	-366	PRSS23	ENSG00000150687	38.4991	70.079	31.5799	55.2002	94.969	39.7688	50.3078	5.10083	0.065499
chr11	95658195	95658212	18	221	processed_transcript	MTMR2	ENSG00000087053	-735	MTMR2	ENSG00000087053	54.5656	70.2011	15.6355	0.0614045	63.4542	63.3928	9.64121	3.30498	0.0581914
chr12	3373257	3373614	358	-8463	processed_transcript	TSPAN9	ENSG00000011105	62915	TSPAN9	ENSG00000011105	34.1279	55.2661	21.1381	32.1123	76.6065	44.4942	44.2897	3.24171	0.064021
chr12	6420378	6420487	110	278	protein_coding	PLEKHG6	ENSG00000008323	278	PLEKHG6	ENSG00000008323	50.8	67.9958	17.1958	25.535	73.6106	48.0756	12.8335	3.30195	0.0535048
chr12	22777318	22777558	241	390	antisense	RP11-268P4.4	ENSG00000257023	-450	ETNK1	ENSG00000139163	44.7036	65.6489	20.9453	46.6847	79.6309	32.9463	29.5959	3.90735	0.0645521
chr12	30947754	30948500	747	0	lincRNA	LINC00941	ENSG00000235884	-39868	CAPRIN2	ENSG00000110888	15.5488	43.1766	27.6278	2.83486	89.0341	86.1992	84.1379	6.38436	0.0652689
chr12	49883255	49883750	496	-147	processed_transcript	SPATS2	ENSG00000123352	-49189	KCNH3	ENSG00000135519	60.8331	79.293	18.4599	42.5877	83.6174	41.0297	19.3328	3.35604	0.0530016
chr12	54353721	54354222	502	3402	lincRNA	AC012531.23	ENSG00000271090	5102	HOXC12	ENSG00000123407	20.1105	38.0155	17.905	33.5756	72.2662	38.6906	45.085	3.51867	0.053081
chr12	114842049	114842268	220	-294	processed_transcript	TBX5	ENSG00000089225	-345	TBX5	ENSG00000089225	25.7905	58.3096	32.5191	12.4568	59.5458	47.089	18.8638	3.21226	0.115395
chr12	115101828	115105547	3720	-5960	misc_RNA	Y_RNA	ENSG00000199220	15847	TBX3	ENSG00000135111	3.80596	67.6292	63.8233	3.13679	90.0008	86.8641	942.053	7.6468	0.108688
chr12	115123415	115123757	343	-1445	protein_coding	TBX3	ENSG00000135111	-1445	TBX3	ENSG00000135111	10.0002	49.379	39.3788	7.67839	92.7823	85.1039	53.6034	3.38652	0.0745568
chr12	115128419	115129506	1088	-6449	protein_coding	TBX3	ENSG00000135111	-6449	TBX3	ENSG00000135111	18.3296	56.2733	37.9436	3.99498	68.7616	64.7667	61.8378	4.26383	0.0673568
chr12	115131142	115132889	1748	-9172	protein_coding	TBX3	ENSG00000135111	-9172	TBX3	ENSG00000135111	28.1227	67.9492	39.8265	6.54188	66.9228	60.381	157.02	8.17959	0.0543385
chr12	125669529	125670011	483	-1370	processed_transcript	TMEM132B	ENSG00000139364	56436	AACS	ENSG00000081760	29.7948	58.4455	28.6507	15.8297	55.6793	39.8495	35.1406	3.81083	0.0665851
chr13	20989349	20989414	66	18570	miRNA	MIR4499	ENSG00000263978	110581	CRYL1	ENSG00000165475	39.9873	60.2961	20.3087	41.0942	84.3441	43.2499	15.0724	3.02001	0.0582818
chr13	29107456	29107551	96	-38190	protein_coding	FLT1	ENSG00000102755	-38190	FLT1	ENSG00000102755	34.6162	53.5395	18.9233	38.4309	78.9872	40.5563	13.6252	3.46192	0.0580234
chr13	31370217	31371618	1402	-5724	lincRNA	LINC00398	ENSG00000237879	60571	ALOX5AP	ENSG00000132965	14.7545	49.2295	34.4751	9.02306	42.3697	33.3466	117.642	5.00937	0.076028
chr13	44359042	44359325	284	1718	protein_coding	ENOX1	ENSG00000120658	1718	ENOX1	ENSG00000120658	43.0331	62.3202	19.2871	58.9934	95.1491	36.1556	19.9784	3.53983	0.055929
chr13	113655251	113655428	178	-155	protein_coding	MCF2L	ENSG00000126217	-155	MCF2L	ENSG00000126217	26.5365	43.375	16.8386	32.6232	73.7086	41.0855	19.0732	3.29165	0.0552444
chr13	114866595	114866846	252	7448	sense_intronic	RASA3-IT1	ENSG00000232487	-23156	RASA3	ENSG00000185989	21.4617	35.4678	14.0062	45.1256	76.9307	31.8051	18.6765	3.15276	0.0592096
chr14	24045501	24045901	401	1877	retained_intron	JPH4	ENSG00000092051	2092	JPH4	ENSG00000092051	28.0089	53.4152	25.4063	5.21062	80.9639	75.7532	106.901	3.40253	0.0741357
chr14	32673663	32673812	150	-1187	snRNA	RNU6-8	ENSG00000202337	-124666	AKAP6	ENSG00000151320	13.3766	34.0938	20.7172	38.6063	72.8312	34.2249	9.53429	3.27028	0.056032
chr14	62083069	62083652	584	-30485	protein_coding	RP11-47I22.3	ENSG00000232774	-30485	RP11-47I22.3	ENSG00000232774	57.9222	74.1314	16.2092	35.1376	65.195	30.0575	19.4106	3.34901	0.0542415
chr14	71632302	71632791	490	-15381	lincRNA	RP6-91H8.2	ENSG00000259907	50670	AC004817.1	ENSG00000267901	38.5768	53.9965	15.4197	32.1429	71.3372	39.1944	41.1762	3.95073	0.0558044
chr14	74238686	74238866	181	-11684	protein_coding	ELMSAN1	ENSG00000156030	-11684	ELMSAN1	ENSG00000156030	44.7738	60.2048	15.431	15.8357	77.225	61.3893	23.9206	3.58147	0.0570435
chr14	89894360	89895046	687	10661	antisense	FOXN3-AS1	ENSG00000258920	-10903	FOXN3	ENSG00000053254	32.7596	55.2285	22.4689	16.5868	83.028	66.4412	42.9268	3.97065	0.0607339
chr14	100204110	100204578	469	23	protein_coding	EML1	ENSG00000066629	23	EML1	ENSG00000066629	21.1042	44.2168	23.1126	24.7218	58.7111	33.9893	108.266	4.92557	0.0545331
chr14	104312558	104312748	191	473	nonsense_mediated_decay	PPP1R13B	ENSG00000088808	651	PPP1R13B	ENSG00000088808	61.9505	80.6459	18.6954	7.18719	60.0082	52.821	16.6136	3.40508	0.0539207
chr15	40764366	40764411	46	1080	protein_coding	CHST14	ENSG00000169105	1080	CHST14	ENSG00000169105	50.791	67.5193	16.7284	17.7474	78.5203	60.7729	15.1366	3.04273	0.0542144
chr15	59663330	59663431	102	1294	nonsense_mediated_decay	MYO1E	ENSG00000157483	-1460	FAM81A	ENSG00000157470	60.0423	83.8981	23.8558	30.8763	80.865	49.9887	18.0506	4.77072	0.0521583
chr15	66998571	66998778	208	-2151	protein_coding	SMAD6	ENSG00000137834	-2151	SMAD6	ENSG00000137834	37.2488	72.9297	35.681	49.9842	91.8651	41.8809	12.0827	3.03881	0.0919871
chr15	68348989	68349074	86	2074	protein_coding	PIAS1	ENSG00000033800	2074	PIAS1	ENSG00000033800	25.7316	46.9027	21.1711	52.2536	86.1369	33.8833	10.7119	3.7219	0.0519244
chr15	83951388	83951468	81	602	protein_coding	BNC1	ENSG00000169594	602	BNC1	ENSG00000169594	45.4877	60.4006	14.9129	2.09599	55.6846	53.5886	12.3871	3.12886	0.0526737
chr15	90583928	90584491	564	-26754	protein_coding	ZNF710	ENSG00000140548	-26754	ZNF710	ENSG00000140548	48.3404	67.0545	18.7141	45.562	85.2512	39.6892	26.6904	3.55289	0.0529349
chr15	90644410	90644475	66	-482	protein_coding	IDH2	ENSG00000182054	-482	IDH2	ENSG00000182054	23.3586	50.5908	27.2322	24.9022	80.2149	55.3127	13.871	4.69204	0.0555541
chr15	99558996	99559232	237	-7971	protein_coding	PGPEP1L	ENSG00000183571	-7971	PGPEP1L	ENSG00000183571	32.6845	60.0095	27.325	12.8753	89.3014	76.4261	64.6266	3.5286	0.0767797
chr16	809803	809962	160	-799	protein_coding	MSLN	ENSG00000102854	-799	MSLN	ENSG00000102854	36.9783	68.6406	31.6623	47.69	79.9403	32.2504	31.6127	3.27483	0.0752177
chr16	11589119	11589939	821	-3507	nonsense_mediated_decay	CTD-3088G3.8	ENSG00000188897	-3507	CTD-3088G3.8	ENSG00000188897	51.7568	78.9776	27.2208	34.8244	74.6278	39.8034	55.5987	5.05484	0.0537402
chr16	23153352	23153812	461	6778	protein_coding	USP31	ENSG00000103404	6778	USP31	ENSG00000103404	44.2875	73.2077	28.9202	26.2033	85.9707	59.7674	32.5296	4.99417	0.0611355
chr16	23154659	23154992	334	5598	protein_coding	USP31	ENSG00000103404	5598	USP31	ENSG00000103404	50.6337	74.4078	23.7741	38.6876	89.9566	51.2689	15.0098	4.82718	0.0617777
chr16	30958828	30959290	463	-416	processed_transcript	AC135048.13	ENSG00000261487	-1096	ORAI3	ENSG00000175938	29.5511	48.2444	18.6933	55.6945	93.1185	37.424	54.5173	5.8575	0.052805
chr16	73066990	73067812	823	14461	protein_coding	ZFHX3	ENSG00000140836	14461	ZFHX3	ENSG00000140836	57.7061	79.0407	21.3346	40.8385	79.6649	38.8264	71.8847	3.60387	0.0547689
chr16	84683203	84683580	378	630	protein_coding	KLHL36	ENSG00000135686	630	KLHL36	ENSG00000135686	38.4898	55.9677	17.4779	34.6411	69.5213	34.8802	29.6161	4.02646	0.051602
chr16	85254632	85254857	226	49749	protein_coding	CTC-786C10.1	ENSG00000262601	49749	CTC-786C10.1	ENSG00000262601	30.7061	59.0509	28.3448	28.7414	77.9887	49.2472	58.2931	3.87807	0.0642358
chr16	85404375	85405000	626	13305	protein_coding	RP11-680G10.1	ENSG00000261567	13305	RP11-680G10.1	ENSG00000261567	43.7027	73.2416	29.5389	12.0764	73.0073	60.9309	98.8267	4.09924	0.0593565
chr16	87839730	87840081	352	0	lincRNA	RP4-536B24.3	ENSG00000260177	-40147	KLHDC4	ENSG00000104731	27.6806	45.2923	17.6118	10.7789	72.8724	62.0935	50.3835	3.73476	0.0527027
chr17	406380	406912	533	0	antisense	RP5-1029F21.3	ENSG00000263015	-110649	FAM101B	ENSG00000183688	56.5685	74.4834	17.9149	29.3158	64.1997	34.8838	65.6016	4.19359	0.0530052
chr17	634737	634860	124	-791	nonsense_mediated_decay	FAM57A	ENSG00000167695	-791	FAM57A	ENSG00000167695	39.9068	58.2447	18.3379	30.3236	76.9679	46.6444	12.281	3.11976	0.0597368
chr17	659376	659617	242	1826	processed_transcript	DBIL5P	ENSG00000231784	-2136	GEMIN4	ENSG00000179409	57.5317	74.8656	17.3339	28.047	89.4765	61.4295	28.9501	3.28843	0.0612972
chr17	767980	768142	163	-628	protein_coding	NXN	ENSG00000167693	-628	NXN	ENSG00000167693	32.5336	46.5907	14.0571	10.0393	63.1047	53.0654	12.9667	3.33226	0.0534834
chr17	2852975	2853245	271	15943	antisense	CTD-3060P21.1	ENSG00000262884	113655	OR1D5	ENSG00000262628	52.8394	67.5354	14.6959	52.1218	88.0548	35.9329	24.096	3.51802	0.0522493
chr17	3466480	3466705	226	-5190	protein_coding	TRPV3	ENSG00000167723	-5190	TRPV3	ENSG00000167723	54.723	72.2723	17.5493	37.0068	67.234	30.2271	19.9139	3.39999	0.0498737
chr17	17280399	17280546	148	6779	processed_pseudogene	RPL13P12	ENSG00000215030	73749	NT5M	ENSG00000205309	54.7542	73.3639	18.6098	19.5737	66.6582	47.0845	19.184	3.2399	0.0559576
chr17	19482630	19482847	218	-408	processed_transcript	AC025627.7	ENSG00000228983	6519	SLC47A1	ENSG00000142494	30.2451	47.0131	16.768	16.1473	48.5898	32.4425	33.0993	3.45255	0.0500292
chr17	37784694	37785185	492	0	retained_intron	PPP1R1B	ENSG00000131771	0	PPP1R1B	ENSG00000131771	27.6698	55.1938	27.524	25.3032	66.6115	41.3083	43.4286	5.71048	0.0539311
chr17	41270925	41271254	330	4877	protein_coding	BRCA1	ENSG00000012048	4877	BRCA1	ENSG00000012048	47.3399	72.3732	25.0333	34.2894	76.0722	41.7828	47.4632	5.73705	0.0508057
chr17	43448627	43448924	298	498	lincRNA	CTB-39G8.2	ENSG00000267446	34375	ARHGAP27	ENSG00000159314	26.1204	46.8803	20.76	2.89799	77.7517	74.8537	44.658	5.11	0.0539118
chr17	43863148	43863478	331	1212	retained_intron	CRHR1	ENSG00000120088	1236	CRHR1	ENSG00000120088	44.1382	67.0398	22.9016	25.9838	81.9736	55.9898	38.6045	4.98297	0.0482493
chr17	48105649	48105900	252	27202	lincRNA	RP11-1094H24.4	ENSG00000246640	-27438	ITGA3	ENSG00000005884	43.5186	60.86	17.3413	1.75954	43.5155	41.756	26.1588	3.3338	0.0503003
chr17	53398981	53399649	669	2666	processed_transcript	HLF	ENSG00000108924	53803	HLF	ENSG00000108924	30.093	49.5135	19.4204	21.5074	69.3276	47.8203	23.8816	3.53687	0.0608261
chr17	59528892	59529169	278	-595	protein_coding	TBX4	ENSG00000121075	-595	TBX4	ENSG00000121075	26.5552	53.6829	27.1277	61.0626	92.2612	31.1987	115.686	4.79074	0.0533653
chr17	59530251	59530701	451	471	protein_coding	TBX4	ENSG00000121075	471	TBX4	ENSG00000121075	20.1232	47.9181	27.7949	37.7613	89.632	51.8707	38.6056	4.45809	0.05879
chr17	59531053	59531554	502	1273	protein_coding	TBX4	ENSG00000121075	1273	TBX4	ENSG00000121075	17.53	47.9089	30.3788	25.0259	70.7973	45.7713	50.8393	5.16695	0.0591237
chr17	59532315	59535195	2881	0	protein_coding	TBX4	ENSG00000121075	0	TBX4	ENSG00000121075	26.8589	60.8611	34.0022	41.2472	79.325	38.0779	764.654	5.24262	0.0627324
chr17	60782592	60783283	692	-283	antisense	RP11-156L14.1	ENSG00000265702	23772	MRC2	ENSG00000011028	44.5958	66.4154	21.8196	8.30026	78.4355	70.1352	58.9437	4.00018	0.0546885
chr17	63605698	63606181	484	30961	protein_coding	CEP112	ENSG00000154240	30961	CEP112	ENSG00000154240	41.3242	60.4573	19.1331	33.6954	64.9349	31.2395	20.0347	3.39876	0.0501581
chr17	73679736	73679883	148	238	antisense	RP11-474I11.7	ENSG00000264270	-8240	SAP30BP	ENSG00000161526	72.3933	86.1262	13.7329	57.17	91.0901	33.92	9.14049	3.07244	0.0486342
chr17	73695730	73696230	501	-2329	retained_intron	SAP30BP	ENSG00000161526	7103	SAP30BP	ENSG00000161526	47.9767	65.1552	17.1784	24.0417	77.4366	53.3949	35.8586	3.34245	0.0516432
chr17	73905763	73906197	435	0	nonsense_mediated_decay	RP11-552F3.12	ENSG00000267426	0	MRPL38	ENSG00000204316	41.7051	57.479	15.7739	17.5621	59.5618	41.9996	52.4809	3.67339	0.0498835
chr17	74378486	74378758	273	-299	retained_intron	SPHK1	ENSG00000176170	633	SPHK1	ENSG00000176170	39.6952	61.7529	22.0576	0.759954	53.8217	53.0617	68.1684	4.36218	0.054033
chr17	75419397	75419547	151	-3490	protein_coding	2009-09-01	ENSG00000184640	-3490	2009-09-01	ENSG00000184640	33.1342	43.2652	10.1309	52.3755	87.4933	35.1179	22.383	3.33373	0.0505944
chr17	78078267	78078503	237	2763	protein_coding	GAA	ENSG00000171298	2763	GAA	ENSG00000171298	39.3235	62.3482	23.0247	15.6959	70.8976	55.2017	50.4959	3.72544	0.0556342
chr17	78835585	78835848	264	-56152	antisense	RP11-28G8.1	ENSG00000262833	-60675	RPTOR	ENSG00000141564	44.1258	62.7751	18.6494	16.3772	59.0296	42.6524	31.7924	3.25851	0.0600934
chr17	78994845	78995230	386	-1033	lincRNA	CTD-2561B21.11	ENSG00000262873	-13719	BAIAP2	ENSG00000175866	22.544	38.9324	16.3883	10.7557	69.3484	58.5928	48.562	3.30739	0.0573809
chr17	79138612	79139546	935	0	antisense	AATK-AS1	ENSG00000225180	270	AATK	ENSG00000181409	38.2025	61.7025	23.5	23.6753	63.5715	39.8962	119.135	6.53124	0.0545678
chr17	79397577	79397690	114	-7705	protein_coding	RP11-1055B8.7	ENSG00000171282	-7705	RP11-1055B8.7	ENSG00000171282	44.9153	58.9791	14.0638	25.9652	80.7155	54.7502	19.9106	3.51313	0.049136
chr17	79503203	79503292	90	30	retained_intron	FSCN2	ENSG00000186765	7644	FSCN2	ENSG00000186765	38.1115	59.4836	21.372	19.9317	83.2036	63.2718	31.3018	3.57959	0.0587369
chr17	79970877	79971570	694	0	retained_intron	ASPSCR1	ENSG00000169696	2189	ASPSCR1	ENSG00000169696	53.6236	74.7217	21.0981	38.0245	88.5267	50.5022	121.652	4.13687	0.062193
chr17	81066765	81067173	409	5559	lincRNA	AC144831.1	ENSG00000261888	14770	METRNL	ENSG00000176845	19.2509	37.6582	18.4073	2.98008	38.9783	35.9982	71.0309	4.19507	0.0504085
chr17	81143292	81143624	333	-16140	lincRNA	AC139099.6	ENSG00000262952	91297	METRNL	ENSG00000176845	49.393	68.8428	19.4497	31.9194	68.2028	36.2834	40.1864	4.06581	0.0519849
chr18	20723871	20723981	111	-5691	processed_transcript	CABLES1	ENSG00000134508	7482	CABLES1	ENSG00000134508	56.8323	75.1041	18.2718	28.2682	76.9835	48.7152	9.13182	3.07159	0.0600352
chr18	24068471	24068558	88	-11615	retained_intron	KCTD1	ENSG00000134504	58404	KCTD1	ENSG00000134504	46.7244	66.9864	20.2619	15.4321	69.2831	53.851	15.9174	3.20407	0.0646301
chr18	52626074	52626380	307	311	retained_intron	CCDC68	ENSG00000166510	358	CCDC68	ENSG00000166510	36.5548	67.3735	30.8187	8.98309	85.3837	76.4006	53.2898	3.77022	0.0604684
chr18	72125498	72125731	234	-318	protein_coding	FAM69C	ENSG00000187773	-318	FAM69C	ENSG00000187773	24.9167	50.3815	25.4648	13.5212	74.812	61.2908	36.2479	3.42094	0.073781
chr19	3388013	3388416	404	21428	protein_coding	NFIC	ENSG00000141905	21428	NFIC	ENSG00000141905	41.4199	60.2764	18.8565	18.0515	68.5585	50.507	88.0848	3.80554	0.0586696
chr19	5058597	5058961	365	11587	processed_transcript	KDM4B	ENSG00000127663	-23501	KDM4B	ENSG00000127663	39.71	67.2354	27.5254	53.0161	94.1877	41.1716	65.567	3.62166	0.0900295
chr19	6091362	6091666	305	-17666	antisense	CTB-66B24.1	ENSG00000267299	18790	RFX2	ENSG00000087903	32.7351	48.6757	15.9406	48.3518	85.3016	36.9498	27.6653	3.89589	0.0511272
chr19	7937308	7937540	233	-934	protein_coding	CTD-3193O13.9	ENSG00000183248	-934	CTD-3193O13.9	ENSG00000183248	38.0959	53.2342	15.1383	49.9379	82.1597	32.2218	72.1608	3.66299	0.0507314
chr19	11194473	11194911	439	-5126	protein_coding	LDLR	ENSG00000130164	-5126	LDLR	ENSG00000130164	62.8246	80.6079	17.7833	16.8855	74.6038	57.7183	26.6639	3.72968	0.0470733
chr19	11195782	11195955	174	-4082	protein_coding	LDLR	ENSG00000130164	-4082	LDLR	ENSG00000130164	32.2516	49.4613	17.2098	27.8591	71.6609	43.8019	15.8823	3.21562	0.0470733
chr19	17579290	17579455	166	-122	nonsense_mediated_decay	SLC27A1	ENSG00000130304	-122	SLC27A1	ENSG00000130304	54.5583	68.4602	13.9019	25.8006	83.84	58.0394	12.6042	3.26798	0.0480587
chr19	18854018	18854518	501	297	protein_coding	CRTC1	ENSG00000105662	297	CRTC1	ENSG00000105662	20.2935	39.902	19.6085	16.413	68.8669	52.4539	107.387	4.29636	0.0528091
chr19	19007505	19007801	297	0	protein_coding	CERS1	ENSG00000223802	0	CERS1	ENSG00000223802	26.9836	45.217	18.2334	15.0465	51.6869	36.6404	35.1752	4.09927	0.0509293
chr19	30574942	30575408	467	46611	processed_pseudogene	CTC-448F2.6	ENSG00000266910	71611	URI1	ENSG00000105176	37.5788	56.3455	18.7667	22.3505	55.5416	33.1911	44.084	3.25243	0.0626517
chr19	35520556	35520872	317	-715	protein_coding	SCN1B	ENSG00000105711	-715	SCN1B	ENSG00000105711	38.479	55.2625	16.7835	33.324	68.7584	35.4345	30.789	4.62786	0.0486594
chr19	40871085	40871421	337	-380	retained_intron	PLD3	ENSG00000105223	-479	PLD3	ENSG00000105223	23.6729	47.0993	23.4265	22.899	87.8234	64.9245	27.4667	5.57197	0.0547005
chr19	46806592	46806912	321	0	protein_coding	HIF3A	ENSG00000124440	0	HIF3A	ENSG00000124440	53.4353	68.5793	15.144	59.767	91.3888	31.6218	30.9822	3.16641	0.0561242
chr19	48812318	48812943	626	-5659	retained_intron	CCDC114	ENSG00000105479	10388	CCDC114	ENSG00000105479	35.727	55.7137	19.9867	14.909	62.1122	47.2032	63.1228	4.42517	0.0495644
chr19	51416807	51417023	217	-2812	protein_coding	KLK4	ENSG00000167749	-2812	KLK4	ENSG00000167749	38.6037	54.3651	15.7613	40.7958	90.6634	49.8677	9.40898	3.25971	0.0469955
chr19	58070036	58070066	31	1113	protein_coding	ZNF550	ENSG00000251369	1113	ZNF550	ENSG00000251369	32.1595	49.1955	17.036	15.7089	59.0238	43.3148	11.4493	3.96395	0.0473207
chr20	4646728	4647202	475	-19679	protein_coding	PRNP	ENSG00000171867	-19679	PRNP	ENSG00000171867	36.673	56.609	19.936	13.0271	55.6044	42.5773	31.9415	4.18405	0.0516631
chr20	20691473	20691709	237	1421	protein_coding	RALGAPA2	ENSG00000188559	1421	RALGAPA2	ENSG00000188559	24.2614	52.4865	28.2251	11.1925	75.4022	64.2097	17.831	3.61952	0.0749453
chr20	36042548	36043331	784	11831	processed_transcript	SRC	ENSG00000197122	29994	SRC	ENSG00000197122	42.2453	57.4228	15.1776	6.0023	56.8524	50.8501	125.612	4.83221	0.0528114
chr20	50108972	50109526	555	-39457	miRNA	MIR3194	ENSG00000266761	49731	NFATC2	ENSG00000101096	34.2587	55.3597	21.101	14.0035	81.929	67.9255	152.786	5.3122	0.0526645
chr20	50331556	50332046	491	17079	processed_transcript	ATP9A	ENSG00000054793	52820	ATP9A	ENSG00000054793	24.0643	39.9945	15.9302	22.9475	66.3963	43.4487	21.5551	3.17316	0.0538841
chr20	55838700	55839384	685	1449	protein_coding	BMP7	ENSG00000101144	1449	BMP7	ENSG00000101144	32.1259	52.2186	20.0927	3.00034	36.9337	33.9333	71.4046	4.46805	0.0527382
chr20	55970561	55970944	384	-2442	antisense	RP4-800J21.3	ENSG00000218018	3274	RBM38	ENSG00000132819	33.1508	55.6841	22.5333	27.9483	83.3141	55.3657	64.6801	3.31307	0.0654932
chr20	61604759	61605161	403	8400	processed_transcript	SLC17A9	ENSG00000101194	20360	SLC17A9	ENSG00000101194	27.951	60.8807	32.9296	19.8706	60.5664	40.6958	54.5299	3.34529	0.0819461
chr20	62466976	62467171	196	-4378	protein_coding	ZBTB46	ENSG00000130584	-4378	ZBTB46	ENSG00000130584	28.6307	49.0468	20.4161	31.9743	75.876	43.9017	16.3446	3.47259	0.0607671
chr21	27306621	27307182	562	0	retained_intron	AP001442.2	ENSG00000233783	41143	APP	ENSG00000142192	28.107	48.4228	20.3158	38.0341	72.686	34.652	56.2863	3.63989	0.0714907
chr21	35016784	35016982	199	-551	protein_coding	CRYZL1	ENSG00000205758	-551	CRYZL1	ENSG00000205758	7.87389	33.0699	25.196	34.1575	85.556	51.3985	27.7589	5.30137	0.0560357
chr21	35575161	35575408	248	-1947	lincRNA	AP000318.2	ENSG00000214955	129290	SLC5A3	ENSG00000272962	35.518	63.1651	27.6471	38.0599	90.438	52.378	31.6339	3.32318	0.0785291
chr21	40179770	40180152	383	-1407	protein_coding	ETS2	ENSG00000157557	-1407	ETS2	ENSG00000157557	39.6578	73.6175	33.9597	2.89745	90.5084	87.6109	22.4261	5.30829	0.0651106
chr21	43733575	43734436	862	0	processed_transcript	TFF3	ENSG00000160180	1009	TFF3	ENSG00000160180	30.9898	54.8275	23.8377	32.823	64.2643	31.4413	80.4613	3.71302	0.0636568
chr21	44723275	44723647	373	28271	lincRNA	LINC00322	ENSG00000237864	123360	SIK1	ENSG00000142178	34.6333	60.5477	25.9144	23.0471	56.9285	33.8815	46.1107	3.55984	0.0673703
chr21	46238662	46238777	116	0	processed_transcript	SUMO3	ENSG00000184900	-617	SUMO3	ENSG00000184900	44.122	59.3308	15.2089	47.578	89.4022	41.8241	64.0734	3.32748	0.0523248
chr21	46402580	46403174	595	9608	processed_transcript	FAM207A	ENSG00000160256	42639	FAM207A	ENSG00000160256	55.4546	80.751	25.2964	22.2057	60.2443	38.0386	177.095	5.82502	0.0533756
chr22	18226977	18227299	323	-3016	retained_intron	BID	ENSG00000015475	29482	BID	ENSG00000015475	54.9486	69.4253	14.4766	32.9247	74.2666	41.3419	49.7489	3.42256	0.0510161
chr22	18402668	18403892	1225	-13027	protein_coding	MICAL3	ENSG00000243156	-13027	MICAL3	ENSG00000243156	38.2276	63.9132	25.6856	14.4041	73.3277	58.9236	126.296	5.32517	0.0555702
chr22	18463000	18463686	687	40	miRNA	MIR648	ENSG00000207780	20259	MICAL3	ENSG00000243156	18.2326	34.4279	16.1953	31.4919	76.0167	44.5248	61.4691	3.36864	0.0529016
chr22	23624534	23624746	213	-649	retained_intron	BCR	ENSG00000186716	28386	BCR	ENSG00000186716	38.7415	59.2485	20.5069	8.80453	51.8165	43.012	30.5226	3.5923	0.0578716
chr22	37817402	37817509	108	-871	processed_transcript	ELFN2	ENSG00000166897	5995	ELFN2	ENSG00000166897	61.7512	74.4954	12.7441	25.7199	77.4947	51.7748	9.2534	3.11085	0.0517778
chr22	38300871	38301236	366	-427	protein_coding	MICALL1	ENSG00000100139	-427	MICALL1	ENSG00000100139	25.5551	43.4689	17.9138	14.7927	79.7892	64.9964	11.5708	4.57628	0.053006
chr22	38568566	38569264	699	-4468	processed_transcript	PLA2G6	ENSG00000184381	7146	PLA2G6	ENSG00000184381	52.7145	73.0423	20.3278	27.1968	64.3089	37.1122	75.139	4.03081	0.0510026
chr22	46848582	46849323	742	28333	processed_pseudogene	RP5-996D20.3	ENSG00000230634	81867	CELSR1	ENSG00000075275	44.8683	68.4171	23.5487	16.9796	71.2018	54.2222	86.5555	4.40514	0.0582448
chr22	50341088	50341224	137	-12936	protein_coding	PIM3	ENSG00000198355	-12936	PIM3	ENSG00000198355	60.8821	73.7487	12.8666	44.1536	85.4613	41.3077	9.16074	3.08391	0.0534176
chr22	50609514	50610627	1114	323	nonsense_mediated_decay	PANX2	ENSG00000073150	353	PANX2	ENSG00000073150	38.8305	60.2379	21.4074	37.1169	88.9781	51.8612	149.364	6.44177	0.0546638
chrX	11447857	11448142	286	-1963	protein_coding	ARHGAP6	ENSG00000047648	-1963	ARHGAP6	ENSG00000047648	53.4688	83.0092	29.5404	52.5951	86.3428	33.7477	11.6125	4.0864	0.0734441
chrX	15512007	15512108	102	-319	protein_coding	PIR	ENSG00000087842	-319	PIR	ENSG00000087842	8.34413	34.6746	26.3305	10.0659	66.7015	56.6356	10.548	4.19642	0.0748125
chrX	39679249	39679954	706	-16860	miRNA	MIR1587	ENSG00000263972	242235	BCOR	ENSG00000183337	33.9425	73.126	39.1834	35.2733	81.0901	45.8168	145.867	5.80262	0.0737614
chrX	39756072	39756133	62	31393	processed_pseudogene	RPS11P7	ENSG00000214047	166056	BCOR	ENSG00000183337	29.4594	56.1617	26.7024	45.1685	79.8202	34.6517	12.5783	3.41578	0.073034
chrX	153030830	153031051	222	0	protein_coding	PLXNB3	ENSG00000198753	0	PLXNB3	ENSG00000198753	20.4533	53.3227	32.8694	10.5764	54.9743	44.398	44.8647	3.57012	0.104193
Hypomethylated DMRs
Chromosome	Start	End	Width	Distance to Closest TSS 1	Closest Transcript Type	Closest Gene Name	Closest Gene ID	Distance to Closest Protein-coding TSS 1	Closest Protein-coding Name	Closest Protein-coding Gene ID							areaStat 2	maxStat 3	tstat.sd 4
chr1	2180973	2181311	339	1537	processed_transcript	SKI	ENSG00000157933	20838	SKI	ENSG00000157933	75.2956	52.4232	-22.8723	87.4168	27.9368	-59.48	-94.5755	-3.23514	0.0523531
chr1	2864969	2865079	111	-72966	protein_coding	ACTRT2	ENSG00000169717	-72966	ACTRT2	ENSG00000169717	51.0672	35.6977	-15.3695	67.028	25.1564	-41.8715	-81.2845	-3.00453	0.0530928
chr1	3121072	3121528	457	-32966	processed_transcript	PRDM16	ENSG00000142611	-39167	PRDM16	ENSG00000142611	56.0326	34.7639	-21.2687	74.6867	42.7229	-31.9638	-75.1471	-3.20492	0.066061
chr1	3141814	3142026	213	-12468	processed_transcript	PRDM16	ENSG00000142611	-18669	PRDM16	ENSG00000142611	40.548	14.9635	-25.5844	89.4668	18.2102	-71.2566	-63.2509	-3.39929	0.0529167
chr1	3332294	3332360	67	-9122	processed_transcript	PRDM16	ENSG00000142611	19238	PRDM16	ENSG00000142611	39.6324	19.4056	-20.2268	49.566	4.82253	-44.7435	-60.9743	-3.18748	0.0696091
chr1	4793436	4793747	312	22220	processed_transcript	AJAP1	ENSG00000196581	78330	AJAP1	ENSG00000196581	64.7482	37.8745	-26.8736	81.4727	37.4856	-43.9871	-50.2045	-3.11541	0.055017
chr1	5473129	5473587	459	-79450	lincRNA	RP1-58B11.1	ENSG00000260972	-577938	KCNAB2	ENSG00000069424	47.6092	28.0619	-19.5473	73.7677	3.49624	-70.2715	-48.4463	-3.08265	0.0641395
chr1	5817321	5817516	196	58502	miRNA	AL356693.1	ENSG00000216045	-234009	KCNAB2	ENSG00000069424	51.2653	31.6336	-19.6316	74.2231	22.4688	-51.7543	-45.8719	-3.57703	0.0605421
chr1	7120631	7121206	576	-46291	antisense	RP11-334N17.1	ENSG00000237365	275039	CAMTA1	ENSG00000171735	54.5833	27.9649	-26.6184	71.6085	32.2322	-39.3763	-44.857	-3.11461	0.063537
chr1	11212399	11212686	288	0	snRNA	RNU6-537P	ENSG00000253086	-20783	MTOR	ENSG00000198793	55.4882	29.3755	-26.1127	65.3579	19.0035	-46.3544	-43.7412	-3.23604	0.0598026
chr1	21856050	21857219	1170	20159	processed_transcript	ALPL	ENSG00000162551	20184	ALPL	ENSG00000162551	50.4941	32.8119	-17.6822	71.458	38.9519	-32.5061	-43.7374	-3.00739	0.0637265
chr1	22618452	22619107	656	25719	miRNA	MIR4418	ENSG00000266564	-147989	WNT4	ENSG00000162552	57.2403	37.106	-20.1343	64.5414	33.9923	-30.5492	-41.0031	-3.03649	0.0658083
chr1	32861146	32861373	228	-813	retained_intron	BSDC1	ENSG00000160058	-1096	BSDC1	ENSG00000160058	59.2796	38.6062	-20.6734	56.0779	25.7298	-30.3481	-37.7505	-3.10251	0.0620752
chr1	33591903	33592306	404	31657	processed_transcript	ADC	ENSG00000142920	44051	ADC	ENSG00000142920	78.5083	55.9161	-22.5922	77.0159	38.7342	-38.2818	-34.2128	-3.19081	0.0704632
chr1	42073658	42074398	741	-28086	processed_transcript	HIVEP3	ENSG00000127124	92273	HIVEP3	ENSG00000127124	73.9355	60.0025	-13.933	78.2629	42.0036	-36.2593	-34.0088	-3.02253	0.0833993
chr1	61475130	61475626	497	-38681	antisense	RP4-668G5.1	ENSG00000237928	-43875	NFIA	ENSG00000162599	68.1337	51.6031	-16.5305	89.1613	50.5599	-38.6014	-33.3086	-4.05356	0.0525565
chr1	67000139	67000765	627	173	protein_coding	SGIP1	ENSG00000118473	173	SGIP1	ENSG00000118473	62.6896	26.2544	-36.4353	87.1591	56.5257	-30.6334	-33.3064	-3.15094	0.0596646
chr1	74929641	74930034	394	-3844	antisense	RP4-650F12.2	ENSG00000233894	18998	LRRC53	ENSG00000162621	46.9312	35.4023	-11.5289	73.378	20.6171	-52.7609	-30.5632	-3.64755	0.0546984
chr1	76189334	76189448	115	247	antisense	RP4-682C21.5	ENSG00000178193	-587	ACADM	ENSG00000117054	86.8722	62.5639	-24.3083	79.4469	36.7108	-42.7361	-30.4804	-3.19367	0.0539875
chr1	98383350	98383686	337	2866	protein_coding	DPYD	ENSG00000188641	2866	DPYD	ENSG00000188641	68.9989	49.4902	-19.5088	82.7247	9.93659	-72.7881	-29.5126	-3.14722	0.0545366
chr1	149185328	149185484	157	8784	snRNA	RNVU1-17	ENSG00000207349	215057	HIST2H3PS2	ENSG00000203818	59.4767	45.05	-14.4266	70.3839	13.6406	-56.7433	-29.3436	-3.02649	0.0567518
chr1	155113439	155113566	128	-367	protein_coding	DPM3	ENSG00000179085	-367	DPM3	ENSG00000179085	66.4203	48.5929	-17.8274	65.5235	15.1892	-50.3343	-29.3175	-3.17142	0.0559486
chr1	156697041	156697368	328	0	processed_transcript	ISG20L2	ENSG00000143319	858	ISG20L2	ENSG00000143319	72.9741	47.099	-25.8751	51.5544	13.6176	-37.9368	-29.0448	-4.92234	0.0544607
chr1	157965828	157966159	332	2392	protein_coding	KIRREL	ENSG00000183853	2392	KIRREL	ENSG00000183853	60.6445	32.8087	-27.8358	85.8566	43.9566	-41.9	-27.7979	-3.02699	0.0521287
chr1	182923215	182923750	536	-554	processed_transcript	SHCBP1L	ENSG00000157060	-709	SHCBP1L	ENSG00000157060	72.4906	50.6105	-21.8801	92.4796	60.1994	-32.2801	-22.8438	-3.15936	0.0554481
chr1	189028161	189028458	298	-22585	processed_pseudogene	CLPTM1LP1	ENSG00000271036	1415472	BRINP3	ENSG00000162670	65.835	49.9341	-15.9009	75.456	24.1285	-51.3275	-21.9843	-3.02012	0.0571619
chr1	201609890	201610413	524	-6963	protein_coding	NAV1	ENSG00000134369	-6963	NAV1	ENSG00000134369	59.1189	33.1923	-25.9267	82.3448	44.8986	-37.4463	-21.8719	-3.07364	0.0569653
chr1	203636532	203637304	773	-9643	processed_pseudogene	RP11-90O23.1	ENSG00000236035	-14632	ATP2B4	ENSG00000058668	72.4596	48.165	-24.2946	84.8907	26.8035	-58.0871	-21.5916	-3.01872	0.0565074
chr1	204639133	204639418	286	6132	lincRNA	RP11-23I7.1	ENSG00000228153	15062	LRRN2	ENSG00000170382	66.655	47.6107	-19.0443	63.3326	28.5787	-34.7539	-19.5598	-3.15095	0.0532943
chr1	207542798	207543158	361	44794	processed_transcript	CD55	ENSG00000196352	47661	CD55	ENSG00000196352	76.5016	53.757	-22.7446	89.8213	20.258	-69.5633	-15.7691	-3.08323	0.0537902
chr1	207995752	207996549	798	0	processed_transcript	C1orf132	ENSG00000203709	52067	CD46	ENSG00000117335	69.095	30.3447	-38.7503	58.169	19.5059	-38.6632	-15.7062	-3.23608	0.0567676
chr1	211650394	211650752	359	14620	processed_transcript	RD3	ENSG00000198570	15506	RD3	ENSG00000198570	66.7307	45.3159	-21.4148	72.6749	42.05	-30.625	-15.1558	-3.00426	0.0623161
chr1	214279731	214280018	288	-75621	antisense	RP11-53A1.2	ENSG00000272167	109851	PROX1	ENSG00000117707	57.4125	44.3452	-13.0673	82.3897	23.8458	-58.5439	-15.1315	-3.00571	0.0581749
chr1	214358661	214359286	626	-95158	processed_transcript	SMYD2	ENSG00000143499	-95289	SMYD2	ENSG00000143499	54.958	34.6139	-20.3441	88.7977	6.82109	-81.9766	-13.8519	-3.33028	0.054303
chr1	228361669	228361749	81	-501	protein_coding	IBA57	ENSG00000181873	-501	IBA57	ENSG00000181873	59.9408	42.3657	-17.5751	44.4473	6.29538	-38.1519	-13.686	-3.19507	0.053142
chr1	236198989	236199146	158	-24830	misc_RNA	Y_RNA	ENSG00000252822	29262	NID1	ENSG00000116962	76.7676	50.4686	-26.299	91.7315	33.9534	-57.7781	-13.1785	-3.18966	0.0534898
chr1	245629269	245629824	556	-44479	protein_coding	KIF26B	ENSG00000162849	-44479	KIF26B	ENSG00000162849	62.5194	41.9303	-20.5891	73.4768	42.7138	-30.763	-9.40519	-3.03826	0.0522882
chr1	245778054	245778694	641	0	antisense	RP11-522M21.2	ENSG00000238224	103749	KIF26B	ENSG00000162849	65.28	38.0208	-27.2592	86.3474	53.4928	-32.8546	-9.13549	-3.00862	0.0580868
chr2	2934894	2935359	466	-59890	lincRNA	AC011995.3	ENSG00000228391	446201	TSSC1	ENSG00000032389	47.064	31.1452	-15.9189	65.4716	28.2017	-37.2699	-82.8018	-3.08941	0.0554618
chr2	12964700	12965635	936	87206	miRNA	MIR3125	ENSG00000264370	106335	TRIB2	ENSG00000071575	68.2672	40.8044	-27.4628	83.7564	29.0212	-54.7351	-61.4325	-3.75619	0.0684317
chr2	20785752	20786228	477	217	lincRNA	RP11-130L8.2	ENSG00000269976	38304	HS1BP3	ENSG00000118960	87.4965	66.604	-20.8925	91.4108	60.6212	-30.7896	-59.3539	-3.26723	0.0607939
chr2	20825587	20826148	562	-934	protein_coding	HS1BP3	ENSG00000118960	-934	HS1BP3	ENSG00000118960	68.6162	46.1578	-22.4584	77.9086	29.2653	-48.6433	-58.2104	-3.0941	0.0627501
chr2	21264880	21265367	488	1466	protein_coding	APOB	ENSG00000084674	1466	APOB	ENSG00000084674	40.6071	22.4639	-18.1431	47.8569	6.73581	-41.1211	-48.8281	-3.03726	0.0554321
chr2	23829388	23829451	64	-35810	protein_coding	KLHL29	ENSG00000119771	-35810	KLHL29	ENSG00000119771	89.5565	73.5576	-15.9989	95.4618	61.9585	-33.5033	-43.6161	-3.09656	0.0593462
chr2	36934440	36935160	721	10419	protein_coding	VIT	ENSG00000205221	10419	VIT	ENSG00000205221	67.5818	44.0029	-23.5789	83.375	38.4684	-44.9065	-41.314	-3.03893	0.0649413
chr2	43367147	43368106	960	37317	lincRNA	AC093609.1	ENSG00000230587	85641	ZFP36L2	ENSG00000152518	83.9011	59.7425	-24.1586	91.4565	60.9543	-30.5023	-40.3391	-3.02634	0.0554129
chr2	79006767	79007262	496	-102310	snRNA	RNU6-827P	ENSG00000202423	-245549	REG3G	ENSG00000143954	42.3175	22.9433	-19.3742	60.2489	11.4143	-48.8346	-38.7254	-3.01188	0.0587344
chr2	96970554	96970578	25	674	protein_coding	SNRNP200	ENSG00000144028	674	SNRNP200	ENSG00000144028	67.715	48.3035	-19.4114	46.643	3.84824	-42.7948	-34.627	-3.00025	0.0582034
chr2	101360351	101361143	793	-21006	lincRNA	AC092168.4	ENSG00000228488	-75470	NPAS2	ENSG00000170485	76.9876	57.7465	-19.241	90.2626	48.3135	-41.9491	-33.1987	-3.11011	0.0633628
chr2	106103439	106104292	854	-48468	protein_coding	FHL2	ENSG00000115641	-48468	FHL2	ENSG00000115641	55.5764	39.9293	-15.6471	85.1691	41.4248	-43.7443	-29.2404	-3.0604	0.0564963
chr2	113470945	113471278	334	-7784	protein_coding	NT5DC4	ENSG00000144130	-7784	NT5DC4	ENSG00000144130	80.3769	60.2557	-20.1212	84.5641	54.2512	-30.3129	-28.3535	-3.05816	0.0552254
chr2	129138662	129139197	536	-30160	misc_RNA	Y_RNA	ENSG00000252742	-62510	HS6ST1	ENSG00000136720	52.9677	34.4757	-18.492	91.4965	54.7662	-36.7302	-27.8199	-3.00228	0.0610267
chr2	133855013	133856126	1114	-18450	protein_coding	AC011755.1	ENSG00000269686	-18450	AC011755.1	ENSG00000269686	72.5424	54.2435	-18.2989	79.062	6.49204	-72.57	-20.7796	-3.07952	0.057558
chr2	142890058	142890104	47	-787	protein_coding	LRP1B	ENSG00000168702	-787	LRP1B	ENSG00000168702	59.2012	34.8528	-24.3484	80.7159	37.5454	-43.1705	-18.803	-3.02453	0.05535
chr2	151395260	151395686	427	0	protein_coding	RND3	ENSG00000115963	0	RND3	ENSG00000115963	59.3433	38.6999	-20.6434	83.7348	53.2135	-30.5214	-17.095	-3.30112	0.0559161
chr2	161245166	161246077	912	7401	misc_RNA	RMRPP3	ENSG00000252465	18322	RBMS1	ENSG00000153250	53.7775	28.9244	-24.8531	68.4022	35.6372	-32.765	-12.5242	-3.05543	0.0629534
chr2	161261724	161262089	366	2303	miRNA	MIR4785	ENSG00000263948	2310	RBMS1	ENSG00000153250	50.1715	29.7089	-20.4626	75.6894	30.9923	-44.6972	-12.2977	-3.75949	0.0552254
chr2	189806269	189806395	127	-32650	protein_coding	COL3A1	ENSG00000168542	-32650	COL3A1	ENSG00000168542	70.4099	51.0637	-19.3463	72.8775	42.5285	-30.349	-12.1993	-3.02363	0.0703805
chr2	195043053	195043547	495	-8555	processed_pseudogene	HNRNPA1P47	ENSG00000236695	-1397153	SLC39A10	ENSG00000196950	63.0346	40.5883	-22.4463	66.7583	21.1325	-45.6258	-288.973	-3.0415	0.0687348
chr2	201037753	201038379	627	-132224	protein_coding	SPATS2L	ENSG00000196141	-132224	SPATS2L	ENSG00000196141	41.1724	22.5899	-18.5825	84.8974	51.8327	-33.0647	-170.687	-3.00998	0.0569451
chr2	202895529	202895552	24	2707	lincRNA	RP11-107N15.1	ENSG00000273209	-3757	FZD7	ENSG00000155760	62.6669	43.8358	-18.8311	76.7045	39.7714	-36.9331	-102.327	-3.09187	0.0654293
chr2	218821788	218822047	260	-12936	protein_coding	TNS1	ENSG00000079308	-12936	TNS1	ENSG00000079308	74.8787	48.0843	-26.7944	82.9897	31.3519	-51.6378	-73.3606	-3.11509	0.0556113
chr2	238641319	238642283	965	-22454	retained_intron	LRRFIP1	ENSG00000124831	40336	LRRFIP1	ENSG00000124831	58.5123	29.4915	-29.0208	48.4091	6.55043	-41.8587	-66.3309	-3.03819	0.0572646
chr3	10418895	10419316	422	16929	miRNA	MIR885	ENSG00000216135	33042	ATP2B2	ENSG00000157087	38.9368	26.5393	-12.3975	64.7218	29.9778	-34.744	-50.1105	-3.25546	0.065577
chr3	22414804	22415271	468	0	processed_transcript	ZNF385D	ENSG00000151789	-621876	ZNF385D	ENSG00000151789	69.9023	51.6003	-18.302	84.5854	17.0757	-67.5097	-43.2332	-3.04362	0.0657642
chr3	29425442	29425761	320	-6577	processed_pseudogene	RPS12P5	ENSG00000226216	102334	RBMS3	ENSG00000144642	74.6947	50.4848	-24.2099	88.2354	41.4136	-46.8218	-37.6882	-3.00891	0.0584738
chr3	47207029	47207211	183	1041	antisense	KIF9-AS1	ENSG00000227398	-1571	SETD2	ENSG00000181555	48.9625	29.3032	-19.6593	41.8519	11.0334	-30.8185	-35.6063	-3.0606	0.0656979
chr3	52017943	52017985	43	389	protein_coding	ACY1	ENSG00000243989	389	ACY1	ENSG00000243989	66.5658	47.2479	-19.3179	52.6614	12.2804	-40.381	-33.1417	-3.23974	0.0560462
chr3	117717026	117717221	196	-586	lincRNA	RP11-384F7.2	ENSG00000239268	-930	LSAMP	ENSG00000185565	51.8585	33.3048	-18.5537	49.1201	0.261347	-48.8587	-29.7118	-3.03607	0.0613991
chr3	120069560	120069764	205	1202	antisense	RP11-174O3.3	ENSG00000240661	-1373	LRRC58	ENSG00000163428	63.3339	42.407	-20.9268	64.8943	17.2679	-47.6264	-21.6094	-3.02951	0.0556322
chr3	134033969	134034956	988	1550	lincRNA	RP11-200A1.1	ENSG00000240006	55797	AMOTL2	ENSG00000114019	84.7676	51.4967	-33.2709	88.4759	55.8649	-32.611	-20.3979	-3.16209	0.0596446
chr3	142959788	142961019	1232	64618	transcribed_processed_pseudogene	PBX2P1	ENSG00000244171	121614	CHST2	ENSG00000175040	58.9674	40.5021	-18.4653	80.2587	48.004	-32.2547	-20.0348	-3.15764	0.0594994
chr3	145879966	145880068	103	-1011	protein_coding	PLOD2	ENSG00000152952	-1011	PLOD2	ENSG00000152952	41.8899	11.5895	-30.3004	73.7426	10.9315	-62.8111	-12.9974	-3.11439	0.0573264
chr3	147663667	147664148	482	5859	lincRNA	RP11-71N10.1	ENSG00000239922	536495	ZIC1	ENSG00000152977	67.7746	51.7185	-16.0561	78.8989	48.2069	-30.692	-9.37183	-3.10398	0.0604939
chr3	153838134	153838354	221	-437	protein_coding	ARHGEF26	ENSG00000114790	-437	ARHGEF26	ENSG00000114790	61.6253	36.7544	-24.8709	60.6297	12.2353	-48.3944	-9.10671	-3.00812	0.0556113
chr3	180320968	180321042	75	617	protein_coding	TTC14	ENSG00000163728	617	TTC14	ENSG00000163728	84.2136	63.69	-20.5236	41.1362	2.29056	-38.8457	-9.03496	-3.00347	0.0799783
chr3	184869019	184869592	574	1209	protein_coding	C3orf70	ENSG00000187068	1209	C3orf70	ENSG00000187068	67.5909	44.1596	-23.4312	56.9605	24.8549	-32.1057	-76.5893	-3.00465	0.0566583
chr3	193497797	193497891	95	14326	processed_pseudogene	RP11-528A4.3	ENSG00000223986	112831	OPA1	ENSG00000198836	41.9996	25.6761	-16.3235	67.1792	30.1447	-37.0345	-71.2075	-3.16159	0.062571
chr4	1203104	1203168	65	-353	processed_transcript	SPON2	ENSG00000159674	-469	SPON2	ENSG00000159674	63.6618	45.0755	-18.5863	56.1833	3.68608	-52.4972	-64.5894	-3.29196	0.0546728
chr4	1313170	1313224	55	9594	protein_coding	MAEA	ENSG00000090316	9594	MAEA	ENSG00000090316	79.8079	58.7172	-21.0907	85.7491	30.8289	-54.9202	-60.9282	-3.11069	0.0749316
chr4	5640545	5640628	84	69665	protein_coding	EVC2	ENSG00000173040	69665	EVC2	ENSG00000173040	72.8274	48.4517	-24.3757	78.0171	7.85686	-70.1603	-59.0948	-4.58858	0.0539907
chr4	5865175	5865335	161	24204	processed_transcript	CRMP1	ENSG00000072832	24872	CRMP1	ENSG00000072832	64.6823	51.2302	-13.4521	48.5249	1.49176	-47.0331	-56.9942	-3.10907	0.0560543
chr4	7127317	7127644	328	-13190	misc_RNA	RN7SKP36	ENSG00000200867	-57392	GRPEL1	ENSG00000109519	67.7256	47.9957	-19.73	57.8853	18.8907	-38.9946	-55.4038	-3.82867	0.0544768
chr4	7256242	7256662	421	-55514	miRNA	MIR4798	ENSG00000264658	61976	SORCS2	ENSG00000184985	64.0895	42.5438	-21.5457	71.9365	33.8047	-38.1318	-49.0179	-3.06772	0.0583063
chr4	7335272	7335367	96	23094	miRNA	MIR4798	ENSG00000264658	-48257	SORCS2	ENSG00000184985	69.8565	47.9238	-21.9327	81.8753	42.6457	-39.2297	-41.0331	-3.81586	0.0581009
chr4	7394625	7395488	864	10999	processed_transcript	SORCS2	ENSG00000184985	10999	SORCS2	ENSG00000184985	59.5104	30.1545	-29.3559	73.1505	15.2887	-57.8618	-40.8205	-3.38611	0.0552103
chr4	7509046	7509821	776	47290	miRNA	MIR4274	ENSG00000266690	-72345	PSAPL1	ENSG00000178597	74.661	53.561	-21.1	79.4065	28.3572	-51.0494	-39.3682	-3.33823	0.0570379
chr4	7589240	7590169	930	127484	miRNA	MIR4274	ENSG00000266690	-145837	SORCS2	ENSG00000184985	58.9268	29.9858	-28.941	58.0764	4.10336	-53.973	-38.3719	-3.19935	0.053075
chr4	8900729	8901183	455	-27185	protein_coding	HMX1	ENSG00000215612	-27185	HMX1	ENSG00000215612	41.2103	22.3379	-18.8724	67.4804	26.9962	-40.4842	-37.1667	-4.51524	0.0559799
chr4	16654071	16654481	411	960	processed_transcript	LDB2	ENSG00000169744	21454	LDB2	ENSG00000169744	74.991	52.822	-22.169	52.3148	3.34667	-48.9681	-26.6102	-3.03909	0.0531648
chr4	17414367	17414641	275	15255	processed_pseudogene	RPS7P6	ENSG00000215278	98962	QDPR	ENSG00000151552	50.9633	32.2798	-18.6835	73.1743	0.661658	-72.5127	-26.5485	-3.65958	0.06206
chr4	26839299	26839399	101	-19900	protein_coding	STIM2	ENSG00000109689	-19900	STIM2	ENSG00000109689	59.0742	45.1183	-13.9559	78.4201	45.7216	-32.6985	-25.6914	-3.04211	0.0581009
chr4	38237514	38237822	309	-2411	miRNA	AC098680.1	ENSG00000221495	190021	TBC1D1	ENSG00000065882	59.8148	35.5269	-24.2879	85.2518	46.7594	-38.4924	-25.5447	-3.14361	0.0565827
chr4	85047423	85047552	130	22888	antisense	RP11-8L2.1	ENSG00000250546	370550	NKX6-1	ENSG00000163623	46.7034	27.2584	-19.445	66.9179	22.6995	-44.2185	-18.0723	-3.00282	0.061488
chr4	85047872	85048380	509	22060	antisense	RP11-8L2.1	ENSG00000250546	369722	NKX6-1	ENSG00000163623	52.0779	32.5038	-19.5742	67.2432	30.3378	-36.9054	-16.046	-3.02634	0.0565465
chr4	86758549	86759208	660	9502	protein_coding	ARHGAP24	ENSG00000138639	9502	ARHGAP24	ENSG00000138639	60.3425	36.5842	-23.7583	84.4055	44.34	-40.0655	-15.8973	-3.06518	0.0565465
chr4	114223576	114224165	590	9059	retained_intron	ANK2	ENSG00000145362	9437	ANK2	ENSG00000145362	72.8237	47.3559	-25.4678	79.2384	41.2835	-37.9549	-15.629	-3.39584	0.0575468
chr4	114238156	114238406	251	-201	retained_intron	ANK2	ENSG00000145362	-1334	ANK2	ENSG00000145362	68.9209	48.0987	-20.8221	72.0018	30.9203	-41.0815	-14.2104	-3.35074	0.0654887
chr4	114277273	114277305	33	-1439	protein_coding	ANK2	ENSG00000145362	-1439	ANK2	ENSG00000145362	70.0037	51.8521	-18.1516	57.2898	21.7213	-35.5685	-13.9399	-3.2963	0.0641186
chr4	145905629	145906024	396	-50259	misc_RNA	RN7SKP235	ENSG00000222594	112509	ANAPC10	ENSG00000164162	81.6477	62.8473	-18.8004	94.1091	37.6878	-56.4213	-10.0099	-3.04198	0.0670964
chr4	148606024	148606173	150	-642	protein_coding	PRMT10	ENSG00000164169	-642	PRMT10	ENSG00000164169	73.5125	53.2544	-20.2581	69.395	28.2873	-41.1077	-9.57899	-3.12237	0.0545813
chr4	173300953	173301430	478	207	processed_pseudogene	RP11-485C11.1	ENSG00000248637	327356	GALNTL6	ENSG00000174473	39.2053	17.1372	-22.0681	68.665	35.4356	-33.2294	-9.56393	-3.07595	0.0593261
chr4	182200329	182200809	481	-14146	lincRNA	RP11-665C14.2	ENSG00000249460	-865033	TENM3	ENSG00000218336	37.1253	22.3254	-14.7999	34.829	0.254161	-34.5748	-9.47317	-3.0156	0.0575939
chr4	190067986	190069237	1252	-45016	lincRNA	RP11-706F1.1	ENSG00000251310	-792705	FRG1	ENSG00000109536	37.4824	27.2736	-10.2088	71.7827	34.2448	-37.5379	-9.12011	-3.01787	0.0563646
chr5	351610	351887	278	7966	protein_coding	AHRR	ENSG00000063438	7966	AHRR	ENSG00000063438	77.8769	57.4143	-20.4625	80.6998	42.4541	-38.2458	-153.044	-3.94368	0.0652186
chr5	1949277	1949722	446	9390	lincRNA	RP11-259O2.1	ENSG00000248994	-61926	IRX4	ENSG00000113430	48.5578	17.3789	-31.1789	80.9331	36.2561	-44.677	-67.565	-3.16691	0.0678253
chr5	1966734	1967990	1257	0	lincRNA	RP11-259O2.2	ENSG00000248597	-79383	IRX4	ENSG00000113430	37.0398	16.6132	-20.4266	79.177	18.0187	-61.1583	-48.9151	-3.02904	0.0563266
chr5	3327977	3328183	207	-124746	lincRNA	RP11-121L11.3	ENSG00000249830	-267984	IRX1	ENSG00000170549	77.4929	53.0541	-24.4388	87.4165	56.8442	-30.5724	-27.1948	-3.28595	0.0598272
chr5	10893642	10894892	1251	-116467	lincRNA	CTD-2154B17.1	ENSG00000250576	-132257	DAP	ENSG00000112977	71.0083	46.5766	-24.4317	69.2848	27.1508	-42.134	-21.9374	-3.02661	0.0556421
chr5	31770333	31770816	484	16006	sense_intronic	RP11-5N11.7	ENSG00000249688	-28214	PDZD2	ENSG00000133401	41.7304	22.159	-19.5714	73.4576	41.3849	-32.0728	-21.8707	-3.09171	0.080539
chr5	38810644	38810905	262	26961	antisense	RP11-122C5.3	ENSG00000250629	-35054	OSMR	ENSG00000145623	70.9625	40.3053	-30.6572	62.8569	31.1705	-31.6865	-21.5569	-3.06487	0.059565
chr5	39331765	39332018	254	32578	retained_intron	C9	ENSG00000113600	32643	C9	ENSG00000113600	55.3468	38.0921	-17.2548	74.9237	25.8575	-49.0662	-21.0887	-3.22736	0.0604939
chr5	50686365	50687233	869	4326	processed_transcript	ISL1	ENSG00000016082	6858	ISL1	ENSG00000016082	67.1888	33.8643	-33.3245	75.8562	34.9271	-40.9292	-19.6572	-3.33045	0.0868255
chr5	50690351	50691809	1459	8312	processed_transcript	ISL1	ENSG00000016082	10844	ISL1	ENSG00000016082	71.6384	36.9519	-34.6865	56.9797	2.38224	-54.5974	-18.6733	-3.0369	0.0603658
chr5	54196885	54198306	1422	22818	processed_pseudogene	RP11-45H22.2	ENSG00000249843	55367	RP11-45H22.3	ENSG00000249016	42.7979	24.8498	-17.9481	64.0409	20.3292	-43.7117	-16.7525	-3.17344	0.06239
chr5	64468007	64469412	1406	25179	processed_transcript	ADAMTS6	ENSG00000049192	300105	ADAMTS6	ENSG00000049192	82.4553	48.7383	-33.717	80.2317	45.5671	-34.6646	-13.0727	-3.17347	0.0552158
chr5	79141366	79142105	740	3563	processed_pseudogene	CTC-431G16.3	ENSG00000238254	144962	MTX3	ENSG00000177034	64.2327	40.7748	-23.4579	80.5557	43.5456	-37.0101	-9.29561	-3.04757	0.0552158
chr5	79951586	79951645	60	614	processed_transcript	MSH3	ENSG00000113318	-783	DHFR	ENSG00000228716	83.8616	63.7635	-20.0981	69.0844	28.3638	-40.7205	-88.0557	-3.3531	0.0535963
chr5	92466258	92466609	352	-61882	lincRNA	CTD-2091N23.1	ENSG00000251361	-452433	NR2F1	ENSG00000175745	68.758	47.3159	-21.4422	75.0138	34.1721	-40.8416	-84.277	-3.20277	0.059937
chr5	92467013	92467650	638	-62637	lincRNA	CTD-2091N23.1	ENSG00000251361	-451392	NR2F1	ENSG00000175745	72.0294	50.0573	-21.9721	74.5139	30.8279	-43.686	-83.4397	-3.02713	0.0531756
chr5	95193073	95193516	444	-3973	antisense	AC008592.5	ENSG00000250362	5136	C5orf27	ENSG00000236882	55.2359	34.6986	-20.5373	82.2992	37.3601	-44.9391	-70.986	-3.17288	0.0520637
chr5	102454018	102454268	251	1524	nonsense_mediated_decay	GIN1	ENSG00000145723	1532	GIN1	ENSG00000145723	66.0817	46.1061	-19.9756	83.8004	36.2958	-47.5046	-64.9281	-3.28574	0.0555421
chr5	110411737	110412017	281	2724	protein_coding	TSLP	ENSG00000145777	2724	TSLP	ENSG00000145777	75.9888	55.4492	-20.5396	87.4951	36.3336	-51.1615	-52.784	-3.16932	0.061658
chr5	110561667	110561928	262	1504	processed_transcript	CAMK4	ENSG00000152495	1882	CAMK4	ENSG00000152495	84.2895	63.1125	-21.1769	91.0722	4.83563	-86.2366	-46.3673	-3.04334	0.0531512
chr5	134912695	134912903	209	1850	protein_coding	CXCL14	ENSG00000145824	1850	CXCL14	ENSG00000145824	54.7937	35.7794	-19.0142	74.1855	23.1934	-50.992	-44.1131	-3.03801	0.0597082
chr5	139926562	139926653	92	-597	protein_coding	EIF4EBP3	ENSG00000243056	-597	EIF4EBP3	ENSG00000243056	72.3724	52.1494	-20.2231	67.1284	16.4965	-50.6319	-27.8482	-3.08886	0.0542772
chr5	140645652	140645798	147	20504	protein_coding	PCDHB15	ENSG00000113248	20504	PCDHB15	ENSG00000113248	60.1454	44.6535	-15.4919	43.1641	0.287591	-42.8765	-25.2043	-3.04634	0.0543616
chr5	150912339	150912409	71	-805	protein_coding	FAT2	ENSG00000086570	-805	FAT2	ENSG00000086570	61.902	46.6941	-15.2079	91.8719	33.6394	-58.2325	-23.282	-3.05024	0.0576514
chr5	156981256	156981576	321	-11395	antisense	AC106801.1	ENSG00000253519	21172	ADAM19	ENSG00000135074	71.6005	45.1709	-26.4296	69.4578	12.4057	-57.0521	-22.6495	-3.18625	0.0518893
chr5	157949608	157950006	399	37299	lincRNA	RP11-32D16.1	ENSG00000254135	576694	EBF1	ENSG00000164330	54.6283	36.1995	-18.4288	64.1864	11.7845	-52.4019	-16.5532	-4.05396	0.0622108
chr5	158166893	158167649	757	-31875	processed_transcript	EBF1	ENSG00000164330	359051	EBF1	ENSG00000164330	57.743	39.6023	-18.1407	60.3005	4.38669	-55.9138	-10.2502	-3.31381	0.062979
chr5	169299701	169300088	388	-93331	antisense	CTB-37A13.1	ENSG00000253269	107655	FAM196B	ENSG00000204767	71.7087	48.2051	-23.5036	83.1929	41.9322	-41.2608	-9.40686	-3.06386	0.0517917
chr5	169300398	169301138	741	-94028	antisense	CTB-37A13.1	ENSG00000253269	106605	FAM196B	ENSG00000204767	71.226	48.3205	-22.9055	81.3431	40.5652	-40.7779	-9.39196	-3.0919	0.0648311
chr5	172043802	172044551	750	-7365	protein_coding	AC027309.1	ENSG00000268553	-7365	AC027309.1	ENSG00000268553	58.5486	31.7488	-26.7998	67.3997	32.6339	-34.7658	-63.2325	-3.08715	0.0528861
chr5	172904729	172905450	722	8043	lincRNA	CTB-164N12.1	ENSG00000253141	136404	BOD1	ENSG00000145919	59.8383	38.7854	-21.053	66.8811	36.4984	-30.3827	-60.0729	-3.14039	0.0599531
chr5	178667980	178668544	565	103886	protein_coding	ADAMTS2	ENSG00000087116	103886	ADAMTS2	ENSG00000087116	54.8305	36.189	-18.6416	80.288	37.4384	-42.8496	-45.989	-3.06348	0.0627691
chr5	178731495	178731896	402	40534	protein_coding	ADAMTS2	ENSG00000087116	40534	ADAMTS2	ENSG00000087116	53.3427	35.0969	-18.2458	70.6513	13.0168	-57.6345	-44.327	-3.00013	0.0571391
chr5	178804046	178804475	430	-30	lincRNA	RP11-443C10.2	ENSG00000253979	-31614	ADAMTS2	ENSG00000087116	65.3691	46.6647	-18.7043	45.2947	13.2771	-32.0176	-41.914	-3.13393	0.057202
chr5	178806048	178806267	220	-285	lincRNA	RP11-443C10.1	ENSG00000253163	-33616	ADAMTS2	ENSG00000087116	58.0858	43.191	-14.8949	67.9604	8.22377	-59.7367	-33.4586	-3.04981	0.0557179
chr5	178866502	178867145	644	-15270	lincRNA	RP11-798K23.1	ENSG00000250674	-94070	ADAMTS2	ENSG00000087116	69.4167	49.4061	-20.0106	64.0115	14.8367	-49.1748	-29.1365	-3.15824	0.0529623
chr6	27301680	27302167	488	9006	unprocessed_pseudogene	VN1R10P	ENSG00000220758	-21730	POM121L2	ENSG00000158553	53.9006	30.8016	-23.099	37.85	5.91233	-31.9376	-9.47639	-3.13702	0.0515527
chr6	28731492	28732335	844	-11357	miRNA	AL662890.1	ENSG00000221191	144430	TRIM27	ENSG00000204713	50.7698	15.6517	-35.1181	72.3197	38.1914	-34.1282	-101.403	-3.06553	0.0584197
chr6	39762213	39763214	1002	1418	protein_coding	DAAM2	ENSG00000146122	1418	DAAM2	ENSG00000146122	53.2634	30.8128	-22.4506	89.9048	40.4722	-49.4327	-86.7017	-3.09831	0.0581284
chr6	44669350	44669990	641	176353	lincRNA	RP3-449H6.1	ENSG00000237530	253256	SUPT3H	ENSG00000196284	71.5779	57.4609	-14.117	84.2527	51.3492	-32.9035	-85.9963	-3.08172	0.0654633
chr6	52408445	52408553	109	33159	protein_coding	TRAM2	ENSG00000065308	33159	TRAM2	ENSG00000065308	67.9252	39.3949	-28.5304	84.8524	50.1605	-34.692	-73.2566	-3.114	0.0623857
chr6	52408863	52409810	948	31902	protein_coding	TRAM2	ENSG00000065308	31902	TRAM2	ENSG00000065308	67.9077	33.5987	-34.3089	86.0203	44.7626	-41.2578	-70.6717	-3.13541	0.0567592
chr6	69342992	69343459	468	756	antisense	RP3-525N10.2	ENSG00000230910	-1799	BAI3	ENSG00000135298	53.4492	31.7166	-21.7326	42.6335	0.583538	-42.0499	-67.2862	-3.02112	0.051642
chr6	75535594	75536637	1044	23562	processed_pseudogene	RP11-560O20.1	ENSG00000219736	292136	COL12A1	ENSG00000111799	65.317	53.6331	-11.6839	83.8937	36.982	-46.9117	-58.3756	-3.26915	0.0633424
chr6	79619177	79619487	311	11267	protein_coding	IRAK1BP1	ENSG00000146243	11267	IRAK1BP1	ENSG00000146243	87.2396	67.5866	-19.653	88.8079	50.1986	-38.6093	-58.0135	-3.0675	0.0540578
chr6	90841902	90841977	76	-15077	processed_pseudogene	RP3-453I5.2	ENSG00000218730	164483	BACH2	ENSG00000112182	68.0218	51.3055	-16.7163	87.4763	42.2157	-45.2606	-51.2731	-3.15326	0.0515539
chr6	108019066	108019452	387	33854	retained_intron	SCML4	ENSG00000146285	34146	SCML4	ENSG00000146285	61.6932	41.8867	-19.8065	75.8114	36.6279	-39.1835	-50.6182	-3.0269	0.0553827
chr6	108273683	108274261	579	4282	protein_coding	SEC63	ENSG00000025796	4282	SEC63	ENSG00000025796	72.2128	49.3448	-22.868	59.3839	9.10504	-50.2788	-49.7855	-3.0457	0.0515539
chr6	110680809	110681031	223	-1333	protein_coding	METTL24	ENSG00000053328	-1333	METTL24	ENSG00000053328	82.3858	63.6188	-18.767	86.0581	53.2922	-32.766	-46.2082	-3.05524	0.0688293
chr6	112572766	112573128	363	2558	protein_coding	LAMA4	ENSG00000112769	2558	LAMA4	ENSG00000112769	50.0023	16.2763	-33.726	93.6233	59.8971	-33.7262	-44.9395	-3.05805	0.0555303
chr6	152127502	152127821	320	-509	protein_coding	ESR1	ENSG00000091831	-509	ESR1	ENSG00000091831	53.0108	29.2227	-23.7881	72.5445	18.1652	-54.3793	-42.5789	-3.04822	0.0540678
chr6	152589214	152589566	353	0	retained_intron	SYNE1	ENSG00000131018	33691	SYNE1	ENSG00000131018	54.698	20.0143	-34.6837	70.9558	34.79	-36.1658	-34.6043	-3.00482	0.0577759
chr6	152620413	152620697	285	2560	protein_coding	SYNE1	ENSG00000131018	2560	SYNE1	ENSG00000131018	79.2502	44.1695	-35.0807	92.1373	52.2414	-39.8959	-32.4351	-3.138	0.0580765
chr6	152621422	152622038	617	1219	protein_coding	SYNE1	ENSG00000131018	1219	SYNE1	ENSG00000131018	64.1394	31.4905	-32.6489	81.2681	36.5597	-44.7084	-30.8143	-3.01124	0.0531763
chr6	153359913	153361701	1789	3476	protein_coding	RGS17	ENSG00000091844	3476	RGS17	ENSG00000091844	82.2599	54.2085	-28.0514	84.4819	27.4085	-57.0734	-21.8867	-3.04479	0.0681241
chr6	157144521	157144706	186	-5654	processed_transcript	ARID1B	ENSG00000049618	43953	ARID1B	ENSG00000049618	72.2142	50.9896	-21.2246	78.6255	40.052	-38.5735	-20.7674	-3.08108	0.0592892
chr6	158421202	158421499	298	-639	sense_intronic	SYNJ2-IT1	ENSG00000233496	-16997	SYNJ2	ENSG00000078269	83.0549	64.3602	-18.6948	84.5992	53.7959	-30.8032	-19.8524	-3.11771	0.0521785
chr6	161897426	161897863	438	-138234	miRNA	AL035697.1	ENSG00000221021	-202332	AGPAT4	ENSG00000026652	46.074	28.3888	-17.6852	85.6068	55.1486	-30.4582	-19.6161	-3.45466	0.0515539
chr6	162761822	162761898	77	-227512	processed_pseudogene	KRT8P44	ENSG00000227913	-386265	PACRG	ENSG00000112530	66.8951	52.688	-14.2071	73.3913	25.811	-47.5803	-18.1041	-3.58321	0.0515539
chr7	209571	210100	530	13945	processed_transcript	FAM20C	ENSG00000177706	16601	FAM20C	ENSG00000177706	72.8796	41.6938	-31.1858	84.6652	50.2187	-34.4464	-15.7619	-3.0502	0.0517064
chr7	1787205	1787439	235	2971	protein_coding	ELFN1	ENSG00000225968	2971	ELFN1	ENSG00000225968	61.1589	37.3583	-23.8006	67.7132	18.9373	-48.776	-14.8611	-3.36936	0.0566563
chr7	2451691	2452205	515	7956	protein_coding	CHST12	ENSG00000136213	7956	CHST12	ENSG00000136213	55.9908	29.279	-26.7119	46.1912	6.02452	-40.1667	-14.2798	-3.26425	0.0654633
chr7	2943926	2944317	392	18356	retained_intron	CARD11	ENSG00000198286	25376	CARD11	ENSG00000198286	49.9253	31.5327	-18.3927	77.2002	18.4949	-58.7053	-14.0741	-3.41533	0.051568
chr7	4296200	4296900	701	23680	retained_intron	SDK1	ENSG00000146555	305647	SDK1	ENSG00000146555	30.9029	15.3427	-15.5601	76.5461	43.4914	-33.0547	-10.853	-3.56961	0.0515539
chr7	15501240	15502218	979	-65020	processed_transcript	AGMO	ENSG00000187546	-95392	AGMO	ENSG00000187546	40.6749	22.6409	-18.034	52.7789	1.00741	-51.7715	-85.261	-3.11663	0.0552011
chr7	38217046	38217216	171	-607	protein_coding	STARD3NL	ENSG00000010270	-607	STARD3NL	ENSG00000010270	62.768	45.1644	-17.6036	51.6973	16.8817	-34.8156	-53.6172	-3.10365	0.0528854
chr7	68000231	68000304	74	-105480	processed_pseudogene	RP5-859M6.1	ENSG00000228429	-1063600	AUTS2	ENSG00000158321	59.0687	38.8043	-20.2644	73.5823	18.7571	-54.8252	-46.3727	-3.18113	0.0523915
chr7	82071071	82071302	232	1728	protein_coding	CACNA2D1	ENSG00000153956	1728	CACNA2D1	ENSG00000153956	59.3632	39.0791	-20.284	82.1343	4.86994	-77.2644	-45.3917	-3.00005	0.0555069
chr7	89783003	89783149	147	-539	protein_coding	STEAP1	ENSG00000164647	-539	STEAP1	ENSG00000164647	72.8286	50.7201	-22.1085	85.0595	45.4453	-39.6142	-37.08	-3.05237	0.0668054
chr7	89840271	89840433	163	515	antisense	STEAP2-AS1	ENSG00000227646	-566	STEAP2	ENSG00000157214	55.2612	29.6987	-25.5625	38.7381	0.624979	-38.1131	-33.4661	-3.00691	0.0645372
chr7	95155479	95155864	386	3922	pseudogene	AC003079.1	ENSG00000203505	-15592	AC002451.1	ENSG00000269449	48.9141	36.6082	-12.3059	60.0213	18.7939	-41.2274	-29.2272	-3.13192	0.0529074
chr7	100471881	100472136	256	-596	retained_intron	SRRT	ENSG00000087087	-611	SRRT	ENSG00000087087	68.4883	44.4611	-24.0272	68.7005	32.9851	-35.7154	-28.9325	-3.00349	0.0536725
chr7	120704246	120704556	311	1426	protein_coding	CPED1	ENSG00000106034	1426	CPED1	ENSG00000106034	82.4766	54.3867	-28.0899	82.2303	18.8191	-63.4112	-25.775	-3.05404	0.0544322
chr7	134388633	134389219	587	19736	lincRNA	AC009276.4	ENSG00000224375	-39783	CALD1	ENSG00000122786	61.1401	38.1815	-22.9586	85.1513	44.459	-40.6923	-23.1579	-3.21217	0.0559149
chr7	135380222	135380369	148	-8915	antisense	RP11-644N4.1	ENSG00000273219	32564	SLC13A4	ENSG00000164707	85.9281	65.5323	-20.3958	90.6433	59.3036	-31.3397	-22.4885	-3.01521	0.0509897
chr7	140331032	140331158	127	8939	protein_coding	DENND2A	ENSG00000146966	8939	DENND2A	ENSG00000146966	48.6683	28.735	-19.9332	82.1292	43.8109	-38.3182	-21.9905	-3.145	0.050675
chr8	1449627	1449738	112	94	protein_coding	DLGAP2	ENSG00000198010	94	DLGAP2	ENSG00000198010	52.9522	36.6104	-16.3417	75.8972	24.7738	-51.1234	-21.8433	-3.04589	0.0545303
chr8	1500302	1501226	925	3491	protein_coding	DLGAP2	ENSG00000198010	3491	DLGAP2	ENSG00000198010	31.6315	10.6844	-20.9471	67.7233	27.8965	-39.8267	-21.7717	-3.17648	0.0548455
chr8	2650721	2651360	640	-64729	lincRNA	RP11-134O21.1	ENSG00000254319	615768	CSMD1	ENSG00000183117	40.9225	25.9692	-14.9534	70.0722	0.119946	-69.9523	-19.5249	-3.03987	0.0502048
chr8	18865578	18866322	745	4873	protein_coding	PSD3	ENSG00000156011	4873	PSD3	ENSG00000156011	72.6102	47.0631	-25.547	66.8986	17.9625	-48.9361	-16.0259	-3.12428	0.0509431
chr8	20186712	20187507	796	-20213	lincRNA	RP11-563N12.2	ENSG00000253164	-25237	LZTS1	ENSG00000061337	47.2346	25.32	-21.9146	84.1058	52.8604	-31.2454	-15.3837	-3.69932	0.0504798
chr8	23176321	23176972	652	545	retained_intron	LOXL2	ENSG00000134013	14035	LOXL2	ENSG00000134013	77.6459	56.691	-20.955	81.306	40.2308	-41.0752	-13.2701	-3.30965	0.0516508
chr8	36877335	36878641	1307	-31404	processed_pseudogene	AC090453.1	ENSG00000243503	90911	KCNU1	ENSG00000215262	65.7367	41.4369	-24.2997	72.0097	33.2466	-38.7631	-12.7461	-3.11645	0.0514172
chr8	36879344	36879585	242	-33413	processed_pseudogene	AC090453.1	ENSG00000243503	92920	KCNU1	ENSG00000215262	60.7058	40.4599	-20.2459	71.8219	34.9801	-36.8419	-12.3686	-3.06806	0.0490211
chr8	37381897	37382352	456	-7357	sense_intronic	RP11-150O12.6	ENSG00000253414	-170916	ZNF703	ENSG00000183779	68.092	48.9918	-19.1002	83.8698	48.7423	-35.1275	-11.1544	-3.08068	0.0554299
chr8	40756870	40757402	533	-1517	protein_coding	ZMAT4	ENSG00000165061	-1517	ZMAT4	ENSG00000165061	44.0815	23.4646	-20.6169	59.2404	6.306	-52.9344	-9.05542	-3.00364	0.0495265
chr8	41093118	41094073	956	34588	miRNA	MIR548AO	ENSG00000263372	70435	SFRP1	ENSG00000104332	80.8379	57.4462	-23.3918	79.8542	45.7076	-34.1466	-247.35	-3.28523	0.059328
chr8	41108429	41108491	63	20170	miRNA	MIR548AO	ENSG00000263372	56017	SFRP1	ENSG00000104332	58.4589	32.0276	-26.4312	80.6054	49.6304	-30.975	-146.156	-3.15221	0.0738695
chr8	49311162	49311630	469	14011	processed_pseudogene	RPL29P19	ENSG00000224594	330717	EFCAB1	ENSG00000034239	42.711	25.4504	-17.2607	83.1477	49.6993	-33.4483	-132.783	-3.89714	0.0644644
chr8	49352253	49352527	275	55102	processed_pseudogene	RPL29P19	ENSG00000224594	289820	EFCAB1	ENSG00000034239	50.8976	31.6352	-19.2623	86.8565	47.8958	-38.9607	-58.9686	-3.07996	0.0732747
chr8	49383468	49383774	307	45874	lincRNA	RP11-567J20.3	ENSG00000253140	258573	EFCAB1	ENSG00000034239	71.5349	49.8361	-21.6988	70.7844	36.608	-34.1764	-56.0579	-3.53289	0.0605241
chr8	52070442	52070801	360	-99446	antisense	RP11-401H2.1	ENSG00000253664	250737	PXDNL	ENSG00000147485	64.869	42.1425	-22.7264	87.6671	21.1085	-66.5586	-51.2527	-3.14317	0.0595836
chr8	91803519	91803564	46	-213	protein_coding	NECAB1	ENSG00000123119	-213	NECAB1	ENSG00000123119	46.6563	33.5779	-13.0784	54.5179	11.8587	-42.6592	-50.9077	-4.1737	0.0588343
chr8	104007391	104008105	715	16377	lincRNA	KB-1507C5.4	ENSG00000254281	-25185	ATP6V1C1	ENSG00000155097	55.6468	37.7936	-17.8532	77.4258	36.7757	-40.6501	-43.0552	-3.10132	0.0634349
chr8	109096406	109096729	324	-492	protein_coding	RSPO2	ENSG00000147655	-492	RSPO2	ENSG00000147655	72.7529	45.7056	-27.0472	57.4612	0.888382	-56.5728	-39.1176	-3.04106	0.060761
chr8	121458459	121458556	98	792	protein_coding	MTBP	ENSG00000172167	792	MTBP	ENSG00000172167	53.8466	32.578	-21.2686	42.278	8.76852	-33.5095	-21.2882	-3.01528	0.0739685
chr8	121665754	121666457	704	-15309	processed_pseudogene	CTC-820M8.1	ENSG00000250290	157925	SNTB1	ENSG00000172164	54.3716	35.9942	-18.3775	70.5884	6.21032	-64.3781	-20.9556	-3.11767	0.0581132
chr8	121704204	121704533	330	1614	processed_transcript	SNTB1	ENSG00000172164	119849	SNTB1	ENSG00000172164	75.033	64.895	-10.138	79.9917	21.5524	-58.4393	-18.9139	-3.02706	0.0581189
chr8	122650717	122651203	487	-329	antisense	HAS2-AS1	ENSG00000248690	2426	HAS2	ENSG00000170961	81.4011	58.6214	-22.7797	88.7908	5.91845	-82.8724	-15.7571	-3.01841	0.0665097
chr8	124670267	124671391	1125	-5076	protein_coding	KLHL38	ENSG00000175946	-5076	KLHL38	ENSG00000175946	74.8891	44.0668	-30.8223	77.5317	23.4402	-54.0915	-15.5539	-3.05711	0.0660189
chr8	130693936	130694131	196	-1450	lincRNA	CCDC26	ENSG00000229140	105002	GSDMC	ENSG00000147697	69.3666	52.3696	-16.997	72.3279	39.0244	-33.3035	-13.413	-4.32015	0.0605241
chr8	133772264	133772889	626	0	protein_coding	TMEM71	ENSG00000165071	0	TMEM71	ENSG00000165071	64.6552	46.7391	-17.9161	67.9316	26.4469	-41.4847	-12.5743	-3.08408	0.0663985
chr8	134044305	134044590	286	7995	retained_intron	SLA	ENSG00000155926	14360	TG	ENSG00000042832	74.3211	54.3999	-19.9212	78.2402	27.9991	-50.2411	-9.44493	-3.13644	0.0622034
chr9	2161027	2161250	224	1081	protein_coding	SMARCA2	ENSG00000080503	1081	SMARCA2	ENSG00000080503	79.7316	54.4001	-25.3315	74.3284	31.1131	-43.2153	-157.176	-3.21064	0.0666387
chr9	4007837	4007880	44	28117	processed_transcript	GLIS3	ENSG00000107249	137312	GLIS3	ENSG00000107249	83.196	60.5804	-22.6156	80.7699	37.1301	-43.6397	-144.844	-3.043	0.0630138
chr9	4008877	4009421	545	26576	processed_transcript	GLIS3	ENSG00000107249	135771	GLIS3	ENSG00000107249	83.009	60.2449	-22.7641	76.6455	35.3171	-41.3284	-133.638	-3.0347	0.0496214
chr9	36853923	36854056	134	-2495	antisense	RP11-344B23.2	ENSG00000258885	148615	PAX5	ENSG00000196092	35.1364	23.1045	-12.0319	77.1729	38.7432	-38.4297	-104.371	-3.008	0.066147
chr9	89701450	89701777	328	-1383	processed_pseudogene	RP11-276H19.4	ENSG00000224887	-61781	C9orf170	ENSG00000204446	58.9117	46.3567	-12.5549	75.8204	36.5729	-39.2476	-63.6317	-3.27473	0.0623262
chr9	91309331	91309724	394	-42255	lincRNA	RP13-60M5.2	ENSG00000228189	159310	NXNL2	ENSG00000130045	63.9364	44.8305	-19.1059	79.9319	26.435	-53.4968	-54.7337	-3.59903	0.0505043
chr9	99253865	99254171	307	8557	processed_transcript	HABP4	ENSG00000130956	41377	HABP4	ENSG00000130956	71.8382	51.8193	-20.0189	63.8116	18.7712	-45.0404	-43.7875	-3.04625	0.0520478
chr9	101707308	101707566	259	-1250	antisense	RP11-92C4.6	ENSG00000270412	1386	COL15A1	ENSG00000204291	57.5095	32.6445	-24.865	53.1423	22.0115	-31.1309	-42.2756	-3.30749	0.0623259
chr9	110796923	110797446	524	-5047	processed_pseudogene	RP11-240E2.2	ENSG00000213557	-256503	AL162389.1	ENSG00000214645	50.6349	30.4334	-20.2015	79.954	28.6845	-51.2695	-40.6515	-3.32523	0.0522731
chr9	112789567	112791171	1605	-1928	processed_pseudogene	RP11-151F5.2	ENSG00000228053	-19706	AKAP2	ENSG00000241978	69.0448	44.3292	-24.7156	70.9123	34.0017	-36.9106	-34.8214	-3.03415	0.0536437
chr9	113340796	113341059	264	763	protein_coding	SVEP1	ENSG00000165124	763	SVEP1	ENSG00000165124	44.3666	19.732	-24.6345	40.6895	7.67247	-33.017	-31.8257	-3.00195	0.0674356
chr9	114768191	114768873	683	-9171	snRNA	RNU6-710P	ENSG00000222356	109144	UGCG	ENSG00000148154	79.1982	61.1683	-18.0299	86.5435	56.249	-30.2945	-31.6073	-3.01643	0.0483075
chr9	115984740	115984874	135	872	processed_transcript	SLC31A1	ENSG00000136868	897	SLC31A1	ENSG00000136868	54.3708	35.8065	-18.5643	36.4869	6.48251	-30.0044	-26.4218	-3.13578	0.0539245
chr9	117882008	117882114	107	-1471	protein_coding	TNC	ENSG00000041982	-1471	TNC	ENSG00000041982	61.7685	35.6035	-26.165	80.9323	40.9085	-40.0237	-25.5824	-3.02165	0.0583459
chr10	12350674	12351074	401	19313	misc_RNA	RN7SL198P	ENSG00000264036	-40406	CAMK1D	ENSG00000183049	57.0704	38.8904	-18.18	70.4708	27.8572	-42.6136	-25.3213	-3.02468	0.0555783
chr10	12783169	12783827	659	-15816	miRNA	MIR548Q	ENSG00000221331	259869	CCDC3	ENSG00000151468	55.9006	28.9271	-26.9735	86.7936	54.5198	-32.2738	-25.0762	-3.99442	0.0521297
chr10	12802381	12802728	348	-35028	miRNA	MIR548Q	ENSG00000221331	240968	CCDC3	ENSG00000151468	78.3712	58.3667	-20.0045	84.9237	51.1842	-33.7394	-24.6118	-3.00596	0.048576
chr10	48436875	48437017	143	1958	protein_coding	GDF10	ENSG00000107623	1958	GDF10	ENSG00000107623	40.6133	18.7803	-21.8329	84.8688	36.4616	-48.4072	-21.729	-3.26055	0.0589959
chr10	61382808	61383508	701	33899	lincRNA	RP11-135D11.2	ENSG00000235140	86328	SLC16A9	ENSG00000165449	69.6716	50.9935	-18.6781	83.4056	38.8806	-44.5249	-20.5734	-3.05412	0.0469456
chr10	91279183	91279898	716	15414	protein_coding	SLC16A12	ENSG00000152779	15414	SLC16A12	ENSG00000152779	69.9222	50.0444	-19.8778	79.0281	48.1685	-30.8596	-20.1782	-3.01518	0.0475512
chr10	102045450	102045534	85	370	protein_coding	BLOC1S2	ENSG00000196072	370	BLOC1S2	ENSG00000196072	66.5987	44.1706	-22.4281	49.8871	9.4605	-40.4266	-20.0944	-3.12193	0.0484212
chr10	105426921	105427632	712	-5283	misc_RNA	Y_RNA	ENSG00000222503	-5458	SH3PXD2A	ENSG00000107957	76.6413	55.0852	-21.5561	88.3414	46.7856	-41.5559	-19.8941	-3.17113	0.0480572
chr10	106389479	106389883	405	-10975	protein_coding	SORCS3	ENSG00000156395	-10975	SORCS3	ENSG00000156395	74.5006	55.9741	-18.5265	73.2609	4.7843	-68.4766	-19.8592	-3.09375	0.0504042
chr10	106390289	106390568	280	-10290	protein_coding	SORCS3	ENSG00000156395	-10290	SORCS3	ENSG00000156395	72.3121	54.714	-17.5981	75.8652	1.4102	-74.455	-19.8288	-3.0027	0.0648395
chr10	115255964	115256451	488	13588	processed_pseudogene	RP11-481H12.1	ENSG00000230018	-54144	HABP2	ENSG00000148702	60.5423	42.6435	-17.8989	81.1723	50.2602	-30.912	-19.2141	-3.28262	0.0471232
chr10	115753624	115754364	741	-49441	protein_coding	ADRB1	ENSG00000043591	-49441	ADRB1	ENSG00000043591	55.8019	33.089	-22.7129	82.0856	49.6829	-32.4027	-18.4526	-3.03054	0.0792819
chr10	116139682	116139895	214	24343	protein_coding	AFAP1L2	ENSG00000169129	24343	AFAP1L2	ENSG00000169129	65.0535	47.2282	-17.8253	86.772	52.9516	-33.8204	-14.3411	-3.22559	0.0589954
chr10	121404082	121404375	294	6113	processed_pseudogene	RP11-179H18.5	ENSG00000227437	-6506	BAG3	ENSG00000151929	50.2826	30.1724	-20.1101	72.3022	39.0883	-33.2139	-13.7503	-4.46728	0.0475675
chr10	132663431	132664072	642	96858	miRNA	MIR378C	ENSG00000264803	445911	TCERG1L	ENSG00000176769	49.4288	29.2948	-20.134	54.8343	15.1454	-39.6889	-10.9652	-3.36134	0.0469549
chr10	132824657	132825002	346	-31006	miRNA	AL607076.1	ENSG00000266057	284981	TCERG1L	ENSG00000176769	56.9743	39.7912	-17.1831	72.3312	38.2372	-34.0939	-10.7466	-3.34417	0.0502359
chr10	133879997	133880110	114	-38064	protein_coding	JAKMIP3	ENSG00000188385	-38064	JAKMIP3	ENSG00000188385	45.6865	24.6591	-21.0274	41.2194	4.7064	-36.513	-9.699	-3.23029	0.0491955
chr10	134692348	134692567	220	-1935	retained_intron	TTC40	ENSG00000171811	-21111	TTC40	ENSG00000171811	64.9798	45.2462	-19.7335	72.6061	33.7692	-38.8369	-9.36966	-3.03171	0.0558613
chr10	134720494	134721059	566	2540	retained_intron	TTC40	ENSG00000171811	35029	TTC40	ENSG00000171811	80.6492	60.5813	-20.0679	90.002	28.4682	-61.5338	-85.2153	-3.00302	0.0652476
chr10	134981093	134981197	105	404	protein_coding	KNDC1	ENSG00000171798	404	KNDC1	ENSG00000171798	63.8118	46.9154	-16.8964	86.4164	54.0342	-32.3822	-84.4052	-3.21368	0.0561297
chr11	2020101	2020114	14	-995	lincRNA	H19	ENSG00000130600	51526	MRPL23	ENSG00000214026	75.5783	57.259	-18.3193	50.8451	20.4728	-30.3722	-75.9646	-3.18683	0.0630946
chr11	8263807	8263882	76	21052	retained_intron	LMO1	ENSG00000166407	21522	LMO1	ENSG00000166407	50.6372	31.9801	-18.657	76.1859	42.5643	-33.6216	-65.8331	-3.04819	0.0574132
chr11	12026079	12027138	1060	-2105	retained_intron	DKK3	ENSG00000050165	2991	DKK3	ENSG00000050165	64.3875	40.3152	-24.0723	64.0633	23.1527	-40.9106	-63.067	-3.62632	0.0628438
chr11	12396966	12397711	746	-1020	protein_coding	PARVA	ENSG00000197702	-1020	PARVA	ENSG00000197702	57.7425	39.7043	-18.0382	90.479	46.6506	-43.8284	-58.5918	-3.244	0.0575309
chr11	22647987	22648107	121	-599	protein_coding	FANCF	ENSG00000183161	-599	FANCF	ENSG00000183161	68.1216	52.8055	-15.316	78.4996	40.585	-37.9146	-52.0196	-3.12649	0.0550119
chr11	66082933	66083296	364	1218	protein_coding	CD248	ENSG00000174807	1218	CD248	ENSG00000174807	66.0896	42.3303	-23.7593	90.5459	56.9429	-33.603	-47.8373	-3.07001	0.056382
chr11	76121673	76122430	758	-6376	misc_RNA	Y_RNA	ENSG00000201756	28823	RP11-111M22.2	ENSG00000179240	48.6502	24.499	-24.1512	75.8838	44.5731	-31.3107	-47.6486	-3.01031	0.0559309
chr11	95216415	95216621	207	844	lincRNA	RP11-338H14.1	ENSG00000250390	-250709	SESN3	ENSG00000149212	77.8001	59.2098	-18.5903	96.1442	45.4067	-50.7375	-45.7488	-3.10006	0.0616138
chr11	102979268	102979478	211	-681	protein_coding	DYNC2H1	ENSG00000187240	-681	DYNC2H1	ENSG00000187240	71.5059	50.8435	-20.6624	85.5626	51.7474	-33.8151	-44.0874	-3.11911	0.0578294
chr11	122100337	122100885	549	-26566	lincRNA	RP11-820L6.1	ENSG00000255090	-113413	BLID	ENSG00000259571	69.3293	48.407	-20.9223	36.1152	4.44551	-31.6697	-43.7662	-3.05919	0.053771
chr11	122177383	122180988	3606	0	processed_transcript	RP11-820L6.1	ENSG00000255090	-190459	BLID	ENSG00000259571	71.0417	25.8994	-45.1423	72.3373	0.467936	-71.8694	-43.6294	-3.14527	0.065667
chr11	122551561	122552213	653	25127	processed_transcript	UBASH3B	ENSG00000154127	25177	UBASH3B	ENSG00000154127	79.8919	56.0003	-23.8916	86.8089	22.7995	-64.0094	-43.0706	-3.214	0.05346
chr11	122597570	122598333	764	-550	snoRNA	snoU13	ENSG00000239079	71186	UBASH3B	ENSG00000154127	73.3152	51.164	-22.1511	81.4747	24.5281	-56.9465	-37.2163	-3.02248	0.0622636
chr11	122611720	122613374	1655	-14700	snoRNA	snoU13	ENSG00000239079	85336	UBASH3B	ENSG00000154127	73.4568	44.6322	-28.8246	76.6626	37.5263	-39.1363	-33.6635	-3.01898	0.0550892
chr11	122904989	122905459	471	-1115	processed_pseudogene	RPL34P23	ENSG00000243669	24345	HSPA8	ENSG00000109971	62.4844	40.8885	-21.5959	75.66	43.3206	-32.3394	-31.5813	-3.06852	0.0601672
chr11	128490544	128492260	1717	0	lincRNA	RP11-264E20.1	ENSG00000255465	-33090	ETS1	ENSG00000134954	63.0366	38.2493	-24.7873	83.3526	43.6422	-39.7104	-26.6955	-3.68946	0.055258
chr11	128500359	128500564	206	8657	lincRNA	RP11-264E20.1	ENSG00000255465	-42905	ETS1	ENSG00000134954	51.4087	37.0631	-14.3455	55.9699	15.9688	-40.0011	-19.4317	-3.04417	0.0587772
chr11	133867685	133867862	178	-29019	lincRNA	RP11-713P17.5	ENSG00000255406	-40804	IGSF9B	ENSG00000080854	43.8001	25.5019	-18.2982	77.3524	34.4129	-42.9395	-13.7723	-3.22763	0.0536901
chr12	2194603	2195214	612	31873	protein_coding	CACNA1C	ENSG00000151067	31873	CACNA1C	ENSG00000151067	69.2825	46.1118	-23.1707	61.746	27.1668	-34.5792	-13.0519	-3.11511	0.0535028
chr12	2195606	2196376	771	32876	protein_coding	CACNA1C	ENSG00000151067	32876	CACNA1C	ENSG00000151067	80.4835	54.871	-25.6125	75.1631	38.2569	-36.9062	-12.4661	-3.02485	0.0737034
chr12	3820463	3820704	242	14788	snRNA	RNU6-174P	ENSG00000222338	41558	EFCAB4B	ENSG00000130038	67.3535	46.2656	-21.0879	76.4399	34.6681	-41.7718	-12.2817	-3.01049	0.0549432
chr12	5920393	5920714	322	58887	processed_transcript	ANO2	ENSG00000047617	-71258	ANO2	ENSG00000047617	52.428	29.8976	-22.5304	63.7511	6.22278	-57.5284	-9.40425	-3.06574	0.0655061
chr12	6401756	6402178	423	-17423	protein_coding	PLEKHG6	ENSG00000008323	-17423	PLEKHG6	ENSG00000008323	56.9973	35.8182	-21.1792	82.1399	48.6361	-33.5039	-9.26798	-3.01949	0.0554531
chr12	8000417	8000719	303	532	misc_RNA	Y_RNA	ENSG00000222978	-15004	SLC2A14	ENSG00000173262	61.0727	42.064	-19.0087	81.4528	50.4417	-31.0112	-124.681	-3.40138	0.0587748
chr12	8146718	8147098	381	581	unprocessed_pseudogene	RP11-69M1.1	ENSG00000240739	-38200	FOXJ2	ENSG00000065970	70.0684	39.3398	-30.7286	66.0307	33.0875	-32.9432	-106.998	-3.06992	0.0512043
chr12	15110977	15111143	167	3056	protein_coding	ARHGDIB	ENSG00000111348	3056	ARHGDIB	ENSG00000111348	73.2449	53.1258	-20.119	90.9316	51.2123	-39.7193	-100.751	-3.02101	0.0707085
chr12	15302806	15303671	866	-1185	lincRNA	RERG-AS1	ENSG00000255660	-11708	RERG	ENSG00000134533	78.7055	63.1535	-15.552	70.1639	25.0689	-45.095	-92.9576	-3.05133	0.0575068
chr12	16725157	16725548	392	4811	antisense	RP11-424M22.3	ENSG00000256564	29581	LMO3	ENSG00000048540	83.7108	56.4351	-27.2757	71.2623	38.6354	-32.6269	-79.0688	-3.00743	0.0539779
chr12	20503389	20503618	230	-18560	protein_coding	PDE3A	ENSG00000172572	-18560	PDE3A	ENSG00000172572	44.4649	33.304	-11.1609	67.4999	34.0942	-33.4057	-67.9683	-3.01055	0.0618657
chr12	20524002	20524221	220	-805	antisense	RP11-284H19.1	ENSG00000256879	1822	PDE3A	ENSG00000172572	66.3823	55.3669	-11.0154	79.4072	9.95683	-69.4504	-55.7583	-3.05609	0.0506927
chr12	23693142	23693793	652	43752	protein_coding	SOX5	ENSG00000134532	43752	SOX5	ENSG00000134532	68.4699	43.3981	-25.0718	61.8986	29.7951	-32.1035	-35.6268	-3.04775	0.0557698
chr12	49583888	49583981	94	-780	protein_coding	TUBA1A	ENSG00000167552	-780	TUBA1A	ENSG00000167552	80.8894	61.9315	-18.9579	88.9274	31.3228	-57.6046	-34.3091	-3.37559	0.0525697
chr12	69291229	69291909	681	-13791	snRNA	RNU7-4P	ENSG00000252770	-27210	CPM	ENSG00000135678	71.8465	52.0882	-19.7584	81.3606	47.9682	-33.3924	-32.375	-3.07713	0.0564618
chr12	76293435	76294595	1161	-25397	processed_pseudogene	RP11-290L1.6	ENSG00000258091	130788	PHLDA1	ENSG00000139289	80.7074	55.6059	-25.1015	76.8385	46.7984	-30.0402	-30.3833	-3.04256	0.0586441
chr12	95994735	95995879	1145	-15585	misc_RNA	Y_RNA	ENSG00000212448	-49468	USP44	ENSG00000136014	84.245	64.7745	-19.4705	88.2803	49.0608	-39.2195	-28.7794	-3.00587	0.0557047
chr12	101382879	101383189	311	1981	processed_transcript	ANO4	ENSG00000151572	-58576	ANO4	ENSG00000151572	54.1319	36.9841	-17.1478	69.166	16.7677	-52.3983	-26.4764	-3.1851	0.0505939
chr12	101384600	101384826	227	3702	processed_transcript	ANO4	ENSG00000151572	-56939	ANO4	ENSG00000151572	64.9859	47.637	-17.3489	77.049	12.0009	-65.0481	-21.5737	-3.01577	0.0586154
chr12	109748567	109748696	130	-1541	protein_coding	FOXN4	ENSG00000139445	-1541	FOXN4	ENSG00000139445	47.3726	31.3428	-16.0298	37.4011	4.12691	-33.2742	-21.0418	-4.07598	0.0580099
chr12	116436484	116437273	790	9676	retained_intron	MED13L	ENSG00000123066	-15243	MED13L	ENSG00000123066	69.3531	44.8898	-24.4633	49.5045	19.1562	-30.3483	-18.3541	-3.01786	0.0524978
chr12	119427578	119427788	211	-3873	misc_RNA	RN7SL508P	ENSG00000244112	8277	SRRM4	ENSG00000139767	53.3455	34.4338	-18.9117	61.8019	0.178029	-61.6239	-17.1391	-3.11041	0.0580099
chr12	120553756	120553955	200	584	protein_coding	RAB35	ENSG00000111737	584	RAB35	ENSG00000111737	66.7071	42.43	-24.2771	44.0615	10.2628	-33.7988	-15.8172	-3.06161	0.0526164
chr12	123867811	123867943	133	-376	protein_coding	SETD8	ENSG00000183955	-376	SETD8	ENSG00000183955	60.6666	41.6158	-19.0508	39.6286	2.16339	-37.4652	-15.471	-3.06802	0.0505878
chr12	128072293	128073239	947	-9473	lincRNA	RP11-351O2.1	ENSG00000255945	-678708	TMEM132C	ENSG00000181234	63.2746	42.9792	-20.2954	70.1403	0.0511722	-70.0891	-13.2526	-3.19964	0.0505998
chr12	128112774	128114530	1757	4075	unprocessed_pseudogene	RP11-351O2.2	ENSG00000257035	-637417	TMEM132C	ENSG00000181234	63.6017	38.5809	-25.0208	53.8359	0.30361	-53.5323	-12.8568	-3.11525	0.0511406
chr12	131588528	131588961	434	12070	processed_transcript	GPR133	ENSG00000111452	27211	GPR133	ENSG00000111452	57.6772	38.8132	-18.864	79.7499	49.7105	-30.0395	-12.7075	-3.04329	0.0505878
chr12	133353502	133353847	346	-223	retained_intron	GOLGA3	ENSG00000090615	-15027	ANKLE2	ENSG00000176915	71.1841	44.2673	-26.9168	88.5648	8.45376	-80.1111	-12.371	-3.05427	0.0687356
chr13	25203828	25204156	329	20610	miRNA	AL359538.1	ENSG00000211508	-50392	ATP12A	ENSG00000075673	61.9728	45.2558	-16.717	80.5619	49.8549	-30.707	-12.0807	-3.01145	0.0569857
chr13	39971503	39972300	798	49052	snoRNA	snoU13	ENSG00000238408	205007	LHFP	ENSG00000183722	74.3306	51.5872	-22.7433	76.7958	4.13129	-72.6646	-9.90108	-3.26541	0.0525697
chr13	40175457	40175779	323	1528	protein_coding	LHFP	ENSG00000183722	1528	LHFP	ENSG00000183722	76.4545	39.2703	-37.1841	81.9956	4.3204	-77.6752	-9.65569	-3.21145	0.051321
chr13	53025253	53025431	179	-489	retained_intron	VPS36	ENSG00000136100	-495	VPS36	ENSG00000136100	78.6084	57.4455	-21.1629	70.5638	25.2329	-45.3308	-9.10757	-3.02474	0.0544659
chr13	73712770	73713049	280	-13822	miRNA	AL354720.1	ENSG00000265959	79839	KLF5	ENSG00000102554	58.2852	37.9424	-20.3428	54.7717	22.276	-32.4957	-9.07933	-3.00907	0.0557698
chr13	74732774	74733118	345	-24379	protein_coding	KLF12	ENSG00000118922	-24379	KLF12	ENSG00000118922	66.4629	49.1136	-17.3493	82.3845	45.7818	-36.6026	-141.364	-4.55763	0.0721779
chr13	78490428	78490715	288	2229	protein_coding	EDNRB	ENSG00000136160	2229	EDNRB	ENSG00000136160	53.8612	38.8906	-14.9706	74.4466	4.99337	-69.4532	-114.679	-3.00737	0.0523248
chr13	109539391	109539625	235	873	protein_coding	MYO16	ENSG00000041515	873	MYO16	ENSG00000041515	76.9111	55.4389	-21.4722	75.8425	39.8028	-36.0397	-66.8581	-3.0839	0.0523248
chr13	110869091	110869282	192	-53185	processed_transcript	COL4A1	ENSG00000187498	-88876	COL4A2	ENSG00000134871	74.6771	44.8662	-29.8109	76.8517	46.1533	-30.6983	-66.6935	-3.08857	0.0529822
chr13	110886667	110886883	217	-70761	processed_transcript	COL4A1	ENSG00000187498	-71275	COL4A2	ENSG00000134871	69.7779	47.0393	-22.7386	90.504	33.4939	-57.0101	-57.9203	-3.04535	0.059082
chr13	110903041	110903661	621	-54497	protein_coding	COL4A2	ENSG00000134871	-54497	COL4A2	ENSG00000134871	55.5902	21.2847	-34.3055	81.5697	49.1222	-32.4476	-55.6152	-3.09251	0.0562392
chr13	110982062	110983035	974	22447	processed_transcript	COL4A2	ENSG00000134871	22447	COL4A2	ENSG00000134871	54.9358	19.0848	-35.851	92.9547	39.4689	-53.4857	-51.2994	-3.07404	0.0624929
chr13	111096574	111096982	409	14175	processed_transcript	COL4A2	ENSG00000134871	117097	RAB20	ENSG00000139832	74.3285	51.7703	-22.5582	83.0571	25.9506	-57.1065	-50.7696	-4.32172	0.059886
chr14	23315585	23315866	282	4754	retained_intron	MMP14	ENSG00000157227	9063	MMP14	ENSG00000157227	66.9194	50.753	-16.1663	75.3384	35.8935	-39.4449	-42.0992	-3.06874	0.0574091
chr14	33751041	33752040	1000	66522	protein_coding	NPAS3	ENSG00000151322	66522	NPAS3	ENSG00000151322	64.5774	52.8298	-11.7476	64.6929	29.4192	-35.2737	-23.7736	-3.57462	0.0673697
chr14	52329392	52329485	94	1349	protein_coding	GNG2	ENSG00000186469	1349	GNG2	ENSG00000186469	50.5053	28.4323	-22.073	92.2335	56.338	-35.8956	-18.6799	-3.0949	0.0605009
chr14	52329945	52330335	391	1902	protein_coding	GNG2	ENSG00000186469	1902	GNG2	ENSG00000186469	68.387	41.985	-26.402	93.463	54.0291	-39.4339	-17.5866	-3.20666	0.0681251
chr14	52830544	52830689	146	49430	protein_coding	PTGER2	ENSG00000125384	49430	PTGER2	ENSG00000125384	51.4205	28.9942	-22.4263	85.1031	38.7113	-46.3918	-16.3027	-3.12315	0.0611856
chr14	55597245	55597543	299	1266	protein_coding	LGALS3	ENSG00000131981	1266	LGALS3	ENSG00000131981	58.8246	35.9505	-22.8741	55.8201	9.33558	-46.4845	-13.4325	-3.3004	0.0624929
chr14	69052402	69052916	515	40122	processed_transcript	RAD51B	ENSG00000182185	174174	RAD51B	ENSG00000182185	72.619	50.9694	-21.6495	89.5926	58.3511	-31.2415	-12.396	-3.07198	0.0553054
chr14	69783936	69784506	571	-14732	processed_transcript	GALNT16	ENSG00000100626	56927	GALNT16	ENSG00000100626	80.3139	62.0149	-18.2991	76.8994	44.733	-32.1665	-11.4387	-3.46633	0.0595613
chr14	80959879	80960405	527	36898	retained_intron	CEP128	ENSG00000100629	86363	CEP128	ENSG00000100629	75.3208	53.9213	-21.3995	90.5725	59.4295	-31.143	-10.5038	-3.34373	0.0607083
chr14	94359836	94360640	805	-24599	protein_coding	FAM181A	ENSG00000140067	-24599	FAM181A	ENSG00000140067	49.056	25.357	-23.699	71.6802	35.9747	-35.7055	-10.4069	-3.36697	0.0562392
chr14	95879419	95880424	1006	-2991	lincRNA	LINC00341	ENSG00000229645	42101	SYNE3	ENSG00000176438	74.1521	52.5986	-21.5536	79.0446	42.348	-36.6966	-9.19522	-3.04229	0.0605009
chr14	99472497	99473588	1092	32845	processed_pseudogene	AL162151.3	ENSG00000234648	263976	BCL11B	ENSG00000127152	40.7685	19.6818	-21.0867	86.1153	51.7017	-34.4135	-218.656	-3.02559	0.054574
chr14	100954362	100955160	799	480	misc_RNA	RN7SKP92	ENSG00000253075	-37122	WDR25	ENSG00000176473	64.8789	47.1768	-17.7022	71.4365	36.5918	-34.8447	-154.126	-3.19105	0.057309
chr14	101643669	101644192	524	-31636	snoRNA	U3	ENSG00000206761	284403	AL117190.3	ENSG00000269375	49.2669	30.2355	-19.0314	78.5785	47.3927	-31.1858	-118.489	-3.05553	0.0633278
chr14	101910390	101910827	438	1976	lincRNA	RP11-168L7.3	ENSG00000259082	-116860	DIO3	ENSG00000197406	68.0901	55.7127	-12.3774	69.5173	38.435	-31.0823	-94.996	-3.05663	0.0566295
chr14	104636265	104636319	55	30887	protein_coding	KIF26A	ENSG00000066735	30887	KIF26A	ENSG00000066735	68.3699	44.62	-23.7499	79.7785	31.037	-48.7415	-57.4624	-3.09134	0.0573437
chr15	29431312	29431640	329	57250	retained_intron	FAM189A1	ENSG00000104059	94784	APBA2	ENSG00000034053	68.3539	50.4916	-17.8623	81.6645	42.2901	-39.3744	-51.0179	-3.07757	0.0514339
chr15	35373222	35373682	461	0	processed_pseudogene	RP11-323I15.3	ENSG00000259665	-92733	ZNF770	ENSG00000198146	56.3492	32.0472	-24.302	89.2076	31.5269	-57.6807	-41.3935	-3.1853	0.0732712
chr15	63140649	63140700	52	-3868	antisense	RP11-1069G10.1	ENSG00000259370	89859	TLN2	ENSG00000171914	82.7131	66.066	-16.6471	84.7546	51.1399	-33.6147	-25.895	-3.03071	0.0799536
chr15	81468354	81468928	575	-6012	nonsense_mediated_decay	IL16	ENSG00000172349	-6271	IL16	ENSG00000172349	53.5214	37.941	-15.5804	78.1892	41.2784	-36.9108	-18.5308	-3.01047	0.0598482
chr15	92571410	92571693	284	-69466	processed_transcript	SLCO3A1	ENSG00000176463	174058	SLCO3A1	ENSG00000176463	45.5881	31.4016	-14.1865	88.5121	28.6704	-59.8417	-18.1591	-3.00649	0.0885796
chr15	95611533	95612388	856	-32566	lincRNA	RP11-255M2.1	ENSG00000258433	712329	MCTP2	ENSG00000140563	52.0627	34.5302	-17.5326	71.7981	23.9435	-47.8546	-15.5531	-3.03725	0.0546672
chr15	98957379	98957735	357	-52333	processed_pseudogene	RP11-719C20.1	ENSG00000259507	71471	FAM169B	ENSG00000185087	45.6593	26.7131	-18.9462	79.3397	27.8291	-51.5106	-9.56817	-3.15714	0.0525715
chr15	98976764	98977315	552	-32753	processed_pseudogene	RP11-719C20.1	ENSG00000259507	51891	FAM169B	ENSG00000185087	61.5246	42.4704	-19.0542	86.3091	42.1666	-44.1425	-79.217	-3.4377	0.0659509
chr16	3746410	3746888	479	-5275	protein_coding	TRAP1	ENSG00000126602	-5275	TRAP1	ENSG00000126602	64.9177	41.8992	-23.0186	65.7104	9.40313	-56.3073	-44.6747	-3.07974	0.0599908
chr16	9136719	9137296	578	-25114	lincRNA	RP11-473I1.6	ENSG00000261392	-48208	C16orf72	ENSG00000182831	68.1896	51.43	-16.7596	78.761	45.1192	-33.6418	-43.1601	-3.04113	0.0593012
chr16	9434351	9435082	732	-14362	lincRNA	RP11-243A14.1	ENSG00000261617	248845	C16orf72	ENSG00000182831	52.1364	30.0195	-22.1169	67.7729	6.94976	-60.8232	-40.2139	-3.61079	0.0606987
chr16	9435411	9435678	268	-13766	lincRNA	RP11-243A14.1	ENSG00000261617	249905	C16orf72	ENSG00000182831	52.168	30.487	-21.6811	69.7014	6.00569	-63.6957	-32.6997	-3.02665	0.0597233
chr16	11423596	11423794	199	12959	protein_coding	RMI2	ENSG00000175643	12959	RMI2	ENSG00000175643	64.5744	45.1564	-19.4181	67.6137	29.5032	-38.1106	-29.361	-3.28154	0.0710941
chr16	12456518	12457561	1044	6407	protein_coding	SNX29	ENSG00000048471	6407	SNX29	ENSG00000048471	44.4012	26.7001	-17.7012	82.527	42.5738	-39.9532	-22.2147	-3.53395	0.0592296
chr16	15587101	15588032	932	-8090	protein_coding	C16orf45	ENSG00000166780	-8090	C16orf45	ENSG00000166780	54.0258	31.2874	-22.7383	80.2324	44.0132	-36.2192	-20.5493	-3.94057	0.0573762
chr16	17310035	17310484	450	42400	retained_intron	XYLT1	ENSG00000103489	254253	XYLT1	ENSG00000103489	76.0571	60.8063	-15.2508	77.3545	0.801332	-76.5532	-19.756	-3.07952	0.0601497
chr16	17318849	17319930	1082	32954	retained_intron	XYLT1	ENSG00000103489	244807	XYLT1	ENSG00000103489	52.8914	33.3835	-19.5079	58.7044	0.418672	-58.2857	-18.0456	-3.39931	0.0547234
chr16	17383051	17384221	1171	-30165	retained_intron	XYLT1	ENSG00000103489	180516	XYLT1	ENSG00000103489	71.303	54.2216	-17.0814	84.1794	7.45865	-76.7207	-16.9737	-3.02453	0.0579466
chr16	17499097	17499956	860	-1738	processed_transcript	XYLT1	ENSG00000103489	64781	XYLT1	ENSG00000103489	75.4553	47.5902	-27.8652	78.8951	17.1166	-61.7785	-15.6295	-3.07529	0.0547234
chr16	17500360	17500583	224	-3001	processed_transcript	XYLT1	ENSG00000103489	64154	XYLT1	ENSG00000103489	72.1732	46.6708	-25.5024	86.698	20.4773	-66.2207	-15.177	-3.02595	0.0565336
chr16	18909890	18910019	130	1346	protein_coding	SMG1	ENSG00000157106	1346	SMG1	ENSG00000157106	70.7064	50.1093	-20.5971	77.3882	19.4536	-57.9346	-15.1617	-3.61334	0.0569582
chr16	18910356	18910607	252	758	protein_coding	SMG1	ENSG00000157106	758	SMG1	ENSG00000157106	72.4692	51.7295	-20.7397	77.2401	25.5797	-51.6604	-12.2163	-3.00632	0.058564
chr16	23765289	23765521	233	-426	protein_coding	CHP2	ENSG00000166869	-426	CHP2	ENSG00000166869	64.8215	41.3233	-23.4982	75.8826	40.7301	-35.1525	-140.288	-3.20776	0.0675278
chr16	23849196	23850114	919	651	protein_coding	PRKCB	ENSG00000166501	651	PRKCB	ENSG00000166501	61.529	29.3573	-32.1717	48.463	1.39794	-47.0651	-109.32	-3.01718	0.0585625
chr16	29322063	29322770	708	-900	transcribed_unprocessed_pseudogene	RP11-231C14.6	ENSG00000260413	92579	NPIPB11	ENSG00000254206	83.7815	52.8964	-30.885	65.098	13.4031	-51.6949	-105.514	-3.0895	0.0655134
chr16	53134482	53134657	176	1389	processed_transcript	CHD9	ENSG00000177200	1409	CHD9	ENSG00000177200	73.0407	53.1428	-19.8979	59.8345	28.1564	-31.6781	-92.9464	-3.03952	0.0581893
chr16	54408793	54408975	183	-4181	lincRNA	RP11-434E6.2	ENSG00000261803	-88117	IRX3	ENSG00000177508	66.729	42.7037	-24.0253	68.9344	34.3854	-34.549	-91.8649	-3.16596	0.0627724
chr16	64926773	64927857	1085	78994	processed_transcript	CDH11	ENSG00000140937	165723	CDH11	ENSG00000140937	76.8768	54.8439	-22.033	67.995	7.40621	-60.5888	-52.238	-3.26082	0.0592711
chr16	86408726	86408974	249	-25436	lincRNA	LINC00917	ENSG00000168367	-135158	FOXF1	ENSG00000103241	62.9467	46.8611	-16.0857	59.3883	2.72239	-56.6659	-45.9132	-3.0198	0.0628984
chr16	86439078	86439715	638	29774	processed_pseudogene	RP11-158I3.1	ENSG00000268473	-104417	FOXF1	ENSG00000103241	67.7554	45.1927	-22.5628	57.5728	7.63972	-49.9331	-33.9454	-3.0072	0.0696772
chr16	86554513	86554950	438	2552	lincRNA	RP11-463O9.9	ENSG00000270020	10379	FOXF1	ENSG00000103241	48.8978	31.1638	-17.734	65.0531	15.9372	-49.1159	-31.482	-3.00755	0.0622834
chr16	86687035	86687674	640	7127	lincRNA	RP11-58A18.1	ENSG00000261161	74919	FOXL1	ENSG00000176678	71.3303	48.317	-23.0133	73.5974	4.86696	-68.7304	-30.4977	-3.03231	0.0729136
chr16	88118215	88118708	494	2280	lincRNA	RP11-863P13.5	ENSG00000261193	114590	BANP	ENSG00000172530	85.2157	62.6825	-22.5333	79.7476	46.1826	-33.565	-27.5988	-3.27209	0.0608121
chr16	89389157	89389871	715	0	antisense	AC137932.6	ENSG00000261253	5522	ANKRD11	ENSG00000167522	63.5609	32.0887	-31.4722	70.8821	24.89	-45.9921	-27.0027	-3.11514	0.0638672
chr16	89572853	89572934	82	-975	protein_coding	SPG7	ENSG00000197912	-975	SPG7	ENSG00000197912	52.0622	29.0036	-23.0587	77.743	15.4252	-62.3179	-25.7238	-3.05501	0.0688868
chr17	6921962	6922534	573	198	antisense	RP11-589P10.7	ENSG00000267047	3602	C17orf49	ENSG00000258315	71.3997	45.6867	-25.713	61.0303	25.8358	-35.1945	-23.8288	-3.24547	0.057044
chr17	10100062	10100599	538	1268	protein_coding	GAS7	ENSG00000007237	1268	GAS7	ENSG00000007237	67.5944	47.2745	-20.3199	86.3951	41.4584	-44.9367	-18.0387	-3.00006	0.0622383
chr17	25796483	25796933	451	-2097	protein_coding	KSR1	ENSG00000141068	-2097	KSR1	ENSG00000141068	78.0481	61.2264	-16.8217	88.4641	50.8854	-37.5787	-16.8712	-3.26148	0.065295
chr17	27272336	27272544	209	521	antisense	RP11-20B24.6	ENSG00000265908	4330	PHF12	ENSG00000109118	79.816	60.884	-18.932	71.1278	39.6758	-31.4521	-14.7392	-3.07517	0.0591226
chr17	27272875	27272969	95	1060	antisense	RP11-20B24.6	ENSG00000265908	3905	PHF12	ENSG00000109118	75.6938	56.8374	-18.8565	65.3769	25.9541	-39.4228	-13.0184	-3.04777	0.0621191
chr17	32366472	32366609	138	281	processed_pseudogene	TLK2P1	ENSG00000226049	117703	ASIC2	ENSG00000108684	53.3411	37.8139	-15.5272	77.5038	15.0777	-62.4261	-12.5035	-3.075	0.0600177
chr17	33904276	33904475	200	-589	protein_coding	AP2B1	ENSG00000006125	-589	AP2B1	ENSG00000006125	72.4899	55.9791	-16.5108	63.5927	33.3649	-30.2278	-12.3899	-3.08865	0.057472
chr17	41780452	41780861	410	16942	processed_pseudogene	RP11-209M4.1	ENSG00000267253	41129	MEOX1	ENSG00000005102	78.692	61.0461	-17.6459	89.3334	48.2543	-41.0791	-12.1731	-3.01103	0.0611514
chr17	41855383	41855415	33	289	processed_transcript	DUSP3	ENSG00000108861	889	DUSP3	ENSG00000108861	66.3261	50.264	-16.0621	64.2618	31.2413	-33.0204	-12.075	-3.01574	0.06274
chr17	48103583	48103800	218	29302	lincRNA	RP11-1094H24.4	ENSG00000246640	-29538	ITGA3	ENSG00000005884	62.4465	47.5147	-14.9319	62.3863	21.789	-40.5973	-9.99868	-3.28798	0.0627724
chr17	48195533	48195610	78	-369	retained_intron	SAMD14	ENSG00000167100	5915	SAMD14	ENSG00000167100	73.1211	54.5711	-18.55	70.8711	35.4562	-35.4149	-9.65551	-3.16988	0.0585274
chr17	48769274	48769721	448	-1087	antisense	RP11-294J22.6	ENSG00000262967	8737	ANKRD40	ENSG00000154945	72.3673	51.8894	-20.4779	54.9169	14.7925	-40.1244	-9.54744	-3.13812	0.0586664
chr17	59399626	59399885	260	-55305	retained_intron	BCAS3	ENSG00000141376	-77371	TBX2	ENSG00000121068	79.0948	55.497	-23.5978	84.4874	49.143	-35.3444	-9.10511	-3.03134	0.0656289
chr17	59400276	59400536	261	-54654	retained_intron	BCAS3	ENSG00000141376	-76720	TBX2	ENSG00000121068	46.3581	23.4069	-22.9512	81.8042	45.5151	-36.2891	-153.269	-3.30279	0.0578419
chr17	59412416	59413023	608	-42167	retained_intron	BCAS3	ENSG00000141376	-64233	TBX2	ENSG00000121068	71.9329	44.3908	-27.5421	79.9495	44.7174	-35.2321	-125.651	-3.13267	0.0602709
chr17	65507182	65507610	429	-12986	sense_intronic	CTD-2653B5.1	ENSG00000264754	53527	PITPNC1	ENSG00000154217	75.8415	56.5017	-19.3398	72.2994	34.6166	-37.6827	-99.2163	-3.06394	0.0601425
chr17	66904946	66905298	353	-5377	retained_intron	ABCA8	ENSG00000141338	32926	ABCA8	ENSG00000141338	65.0078	46.0371	-18.9708	43.0783	3.76731	-39.3109	-83.0763	-3.13894	0.0717033
chr17	71713686	71714442	757	-19550	lincRNA	CTD-2532D12.4	ENSG00000263574	-73457	SDK2	ENSG00000069188	53.2951	34.2915	-19.0037	76.2875	43.7721	-32.5154	-73.3841	-3.00306	0.0562519
chr17	72198872	72199226	355	-494	protein_coding	RPL38	ENSG00000172809	-494	RPL38	ENSG00000172809	46.6822	31.2258	-15.4564	37.2929	3.55265	-33.7403	-68.917	-3.01151	0.0608455
chr17	72369920	72370074	155	6322	nonsense_mediated_decay	GPR142	ENSG00000257008	6322	GPR142	ENSG00000257008	60.2321	41.4195	-18.8126	67.1021	17.4062	-49.6959	-65.5848	-3.07266	0.0570971
chr17	78423606	78423905	300	4623	lincRNA	CTD-2526A2.2	ENSG00000260369	24301	ENDOV	ENSG00000173818	52.1181	32.4708	-19.6474	63.0177	30.212	-32.8057	-64.9304	-3.08538	0.0594649
chr17	80354184	80355226	1043	-2396	retained_intron	OGFOD3	ENSG00000181396	6616	OGFOD3	ENSG00000181396	49.6858	25.6981	-23.9877	66.3959	32.7618	-33.634	-64.0159	-3.01718	0.0644903
chr18	766179	766727	549	8539	protein_coding	YES1	ENSG00000176105	8539	YES1	ENSG00000176105	69.485	46.7408	-22.7442	73.1815	39.6308	-33.5507	-63.1323	-3.07604	0.0559794
chr18	8608062	8608097	36	-1345	protein_coding	RAB12	ENSG00000206418	-1345	RAB12	ENSG00000206418	69.3496	49.8891	-19.4605	90.3792	56.7923	-33.5869	-56.002	-3.11742	0.0828474
chr18	8952875	8953392	518	-66634	processed_pseudogene	RPS4XP19	ENSG00000242058	-149235	NDUFV2	ENSG00000178127	72.2721	41.397	-30.8751	86.5592	26.9861	-59.5731	-53.0089	-3.29223	0.0565791
chr18	8990894	8991302	409	-28724	processed_pseudogene	RPS4XP19	ENSG00000242058	-111325	NDUFV2	ENSG00000178127	75.4066	56.7524	-18.6542	86.5869	32.1563	-54.4306	-42.3249	-3.0394	0.0726203
chr18	13366702	13367289	588	-459	antisense	RP11-691H4.3	ENSG00000267393	-15263	LDLRAD4	ENSG00000168675	68.5649	47.0571	-21.5078	74.1073	38.0253	-36.082	-40.8979	-3.24585	0.0590655
chr18	34272808	34275305	2498	0	processed_transcript	FHOD3	ENSG00000134775	-23214	FHOD3	ENSG00000134775	54.0119	24.935	-29.0769	76.5396	39.1212	-37.4184	-37.3225	-3.06199	0.059097
chr18	46411117	46411806	690	22201	processed_transcript	CTIF	ENSG00000134030	63068	SMAD7	ENSG00000101665	75.9265	54.7026	-21.2239	78.219	44.6561	-33.5629	-32.8312	-3.35696	0.0569462
chr18	52920118	52920599	482	22302	protein_coding	TCF4	ENSG00000196628	22302	TCF4	ENSG00000196628	64.9116	40.3101	-24.6015	79.8408	43.2705	-36.5703	-32.6392	-3.02421	0.0573766
chr18	52985032	52985997	966	3038	processed_transcript	TCF4	ENSG00000196628	3219	TCF4	ENSG00000196628	78.9833	41.1983	-37.785	86.9898	33.7061	-53.2838	-24.0092	-3.29991	0.0656819
chr18	52986421	52986478	58	2557	processed_transcript	TCF4	ENSG00000196628	2738	TCF4	ENSG00000196628	51.0438	14.285	-36.7589	80.2936	34.8998	-45.3938	-23.9054	-3.20915	0.056022
chr18	53070117	53070851	735	0	processed_transcript	TCF4	ENSG00000196628	85	TCF4	ENSG00000196628	92.0553	61.8708	-30.1845	88.6253	56.9449	-31.6804	-23.5501	-3.23172	0.0613007
chr18	55922060	55922474	415	7546	processed_transcript	NEDD4L	ENSG00000049759	33256	NEDD4L	ENSG00000049759	68.0336	47.79	-20.2436	53.1731	18.7922	-34.3808	-23.0015	-3.02921	0.0594692
chr18	59410348	59410474	127	-4934	lincRNA	RP11-1096D5.1	ENSG00000260440	150517	RNF152	ENSG00000176641	66.0384	42.2117	-23.8268	78.4661	29.4368	-49.0292	-22.3074	-3.34437	0.0568472
chr18	59411111	59411285	175	-4123	lincRNA	RP11-1096D5.1	ENSG00000260440	149706	RNF152	ENSG00000176641	72.2282	48.0957	-24.1324	80.4789	29.7821	-50.6968	-21.4043	-3.0107	0.063028
chr18	60283291	60284143	853	33690	misc_RNA	RN7SL705P	ENSG00000243549	76543	ZCCHC2	ENSG00000141664	53.987	28.3025	-25.6845	86.5155	55.6683	-30.8472	-20.7613	-3.88622	0.0631091
chr18	74123368	74124927	1560	-31126	processed_transcript	ZNF516	ENSG00000101493	-32499	ZNF516	ENSG00000101493	75.6897	40.915	-34.7747	88.8283	32.1018	-56.7265	-20.009	-3.11831	0.0741092
chr18	74164240	74164457	218	38277	protein_coding	ZNF516	ENSG00000101493	38277	ZNF516	ENSG00000101493	55.1633	26.061	-29.1023	84.6945	22.1763	-62.5182	-18.5129	-3.02842	0.0723807
chr19	743215	743770	556	-7355	protein_coding	MISP	ENSG00000099812	-7355	MISP	ENSG00000099812	55.8178	31.6261	-24.1917	45.5093	11.478	-34.0313	-17.4531	-3.35691	0.059097
chr19	745134	745643	510	-5482	protein_coding	MISP	ENSG00000099812	-5482	MISP	ENSG00000099812	58.1766	36.2325	-21.9442	76.6715	22.3931	-54.2785	-15.8898	-3.52191	0.0587597
chr19	1829950	1830278	329	6750	antisense	CTB-31O20.4	ENSG00000267244	-17674	ATP8B3	ENSG00000130270	84.7144	58.757	-25.9574	76.0746	12.963	-63.1116	-15.2314	-3.01704	0.0726203
chr19	2185762	2186781	1020	-4229	retained_intron	DOT1L	ENSG00000104885	21577	DOT1L	ENSG00000104885	53.5721	20.7433	-32.8288	64.5063	20.9518	-43.5546	-12.8234	-3.05569	0.0594692
chr19	2268712	2268747	36	659	processed_transcript	JSRP1	ENSG00000167476	-737	OAZ1	ENSG00000104904	62.541	44.2145	-18.3265	74.3446	23.646	-50.6987	-12.7576	-3.10376	0.0612554
chr19	9945142	9945312	171	376	lincRNA	CTD-2623N2.11	ENSG00000267289	-686	PIN1	ENSG00000127445	71.2105	52.2843	-18.9262	55.6743	22.3741	-33.3003	-12.6451	-3.12236	0.0562988
chr19	11007801	11008313	513	-21348	retained_intron	CARM1	ENSG00000142453	-22291	CARM1	ENSG00000142453	70.2618	45.3941	-24.8677	72.4238	29.6349	-42.7889	-10.7427	-3.47722	0.0573167
chr19	13811133	13811609	477	-30964	retained_intron	CCDC130	ENSG00000104957	-30964	CCDC130	ENSG00000104957	37.1366	20.8752	-16.2614	44.4254	1.27061	-43.1548	-10.3359	-3.35988	0.0577715
chr19	15219504	15219696	193	0	protein_coding	SYDE1	ENSG00000105137	0	SYDE1	ENSG00000105137	56.9621	39.5638	-17.3983	67.6787	30.8216	-36.8572	-9.42295	-3.03868	0.0562157
chr19	17458049	17458477	429	6293	retained_intron	GTPBP3	ENSG00000130299	9684	GTPBP3	ENSG00000130299	77.3304	57.5875	-19.7429	84.4798	49.6767	-34.8031	-9.41913	-3.11055	0.0584991
chr19	17667458	17667625	168	87	protein_coding	COLGALT1	ENSG00000130309	87	COLGALT1	ENSG00000130309	64.0359	45.7682	-18.2677	51.466	14.2761	-37.19	-115.134	-3.02158	0.0680404
chr19	21107097	21107180	84	889	protein_coding	ZNF85	ENSG00000105750	889	ZNF85	ENSG00000105750	58.6864	37.8421	-20.8443	46.1296	4.68687	-41.4427	-84.1923	-3.05762	0.0625008
chr19	22598099	22598692	594	6455	protein_coding	ZNF98	ENSG00000197360	6455	ZNF98	ENSG00000197360	75.5869	62.3358	-13.2511	85.2203	0.158058	-85.0622	-66.5876	-3.22446	0.0537923
chr19	23259219	23259680	462	1205	lincRNA	CTD-2291D10.4	ENSG00000267886	1206	ZNF730	ENSG00000183850	78.8236	52.0786	-26.7449	78.8796	0.460241	-78.4193	-65.868	-3.30966	0.0706695
chr19	23870876	23871161	286	-853	protein_coding	ZNF675	ENSG00000197372	-853	ZNF675	ENSG00000197372	59.9374	42.2591	-17.6783	67.8927	13.521	-54.3717	-51.5244	-3.3456	0.0540202
chr19	31233486	31233777	292	-73931	lincRNA	CTC-565M22.1	ENSG00000267760	193232	ZNF536	ENSG00000198597	45.2722	28.2503	-17.0219	57.0235	10.2757	-46.7478	-50.3514	-3.01074	0.0621127
chr19	32207157	32208447	1291	-60789	rRNA	RNA5SP471	ENSG00000252780	-366703	TSHZ3	ENSG00000121297	45.6504	27.7743	-17.8761	56.881	25.5957	-31.2853	-43.0306	-3.10001	0.0592756
chr19	32208671	32209370	700	-62303	rRNA	RNA5SP471	ENSG00000252780	-368217	TSHZ3	ENSG00000121297	36.2615	20.495	-15.7665	58.7973	27.6187	-31.1785	-41.1684	-3.69071	0.0586045
chr19	41726650	41726864	215	344	processed_transcript	AXL	ENSG00000167601	1509	AXL	ENSG00000167601	53.4557	35.5447	-17.911	79.1977	13.7366	-65.4612	-37.3335	-3.00886	0.0620989
chr19	47234921	47234990	70	54	processed_transcript	STRN4	ENSG00000090372	-3704	STRN4	ENSG00000090372	72.7005	38.6137	-34.0867	71.273	18.2765	-52.9965	-32.2563	-3.09214	0.0579383
chr19	47617513	47618143	631	-503	protein_coding	ZC3H4	ENSG00000130749	-503	ZC3H4	ENSG00000130749	58.6932	16.5374	-42.1558	55.5835	9.38024	-46.2032	-28.9067	-4.63789	0.0569757
chr19	51002809	51003359	551	7926	retained_intron	JOSD2	ENSG00000161677	10985	JOSD2	ENSG00000161677	58.5261	39.6473	-18.8788	58.051	14.2216	-43.8294	-25.4092	-3.09799	0.0671826
chr19	52644156	52644566	411	-980	protein_coding	ZNF616	ENSG00000204611	-980	ZNF616	ENSG00000204611	78.0173	56.4255	-21.5918	75.36	20.7875	-54.5725	-25.3192	-3.06451	0.0578716
chr19	53245812	53246235	424	-7485	processed_transcript	ZNF611	ENSG00000213020	-7504	ZNF611	ENSG00000213020	54.8085	41.4865	-13.322	55.6223	9.61157	-46.0108	-19.6802	-3.22293	0.0548586
chr19	53695616	53695721	106	858	processed_transcript	ZNF665	ENSG00000197497	887	ZNF665	ENSG00000197497	50.1098	32.7963	-17.3135	45.3518	0.0255626	-45.3262	-17.0336	-3.0118	0.0644113
chr19	53700833	53700940	108	393	lincRNA	CTD-2245F17.3	ENSG00000269051	-4205	ZNF665	ENSG00000197497	59.4488	42.4395	-17.0093	45.8259	14.4626	-31.3634	-15.9213	-3.00191	0.0643121
chr19	55815422	55815444	23	5	processed_transcript	BRSK1	ENSG00000160469	1819	BRSK1	ENSG00000160469	88.088	71.2855	-16.8025	78.7099	42.1993	-36.5107	-15.5508	-3.07777	0.0627488
chr19	56591186	56591346	161	13135	lincRNA	CTD-2621I17.6	ENSG00000267522	23506	ZNF787	ENSG00000142409	62.7192	46.1227	-16.5965	56.0201	23.1088	-32.9113	-15.4371	-3.02308	0.0729053
chr19	57374081	57374592	512	21463	lincRNA	MIMT1	ENSG00000268654	-21983	ZIM2	ENSG00000269699	41.8157	23.4727	-18.343	76.4257	8.43216	-67.9936	-15.0069	-4.84074	0.0586045
chr19	57374952	57375153	202	22334	lincRNA	MIMT1	ENSG00000268654	-22854	ZIM2	ENSG00000269699	43.5133	25.3849	-18.1284	77.1836	10.8158	-66.3678	-14.2106	-3.34486	0.0715957
chr19	58521754	58522305	552	-7036	protein_coding	ZNF606	ENSG00000166704	-7036	ZNF606	ENSG00000166704	76.6139	52.5578	-24.0562	68.9203	5.5001	-63.4202	-12.4031	-3.0669	0.0538736
chr19	58566315	58566481	167	-4125	protein_coding	ZNF135	ENSG00000176293	-4125	ZNF135	ENSG00000176293	44.6188	30.1819	-14.4368	44.022	2.17734	-41.8447	-10.2391	-3.09555	0.0540207
chr20	2631990	2632013	24	-777	protein_coding	NOP56	ENSG00000101361	-777	NOP56	ENSG00000101361	64.6329	46.3308	-18.3022	46.0351	12.968	-33.0671	-9.11416	-3.0019	0.0622633
chr20	4214868	4214956	89	14764	protein_coding	ADRA1D	ENSG00000171873	14764	ADRA1D	ENSG00000171873	70.528	53.3197	-17.2082	64.2483	21.3959	-42.8524	-80.6645	-3.10585	0.0751626
chr20	4215288	4215387	100	14333	protein_coding	ADRA1D	ENSG00000171873	14333	ADRA1D	ENSG00000171873	73.9048	55.9948	-17.91	70.0956	25.0184	-45.0772	-59.271	-3.00201	0.0582541
chr20	7892499	7892844	346	28276	protein_coding	HAO1	ENSG00000101323	28276	HAO1	ENSG00000101323	67.3873	53.2423	-14.1451	62.6984	24.5326	-38.1657	-52.728	-3.00839	0.0560677
chr20	7893198	7893313	116	27807	protein_coding	HAO1	ENSG00000101323	27807	HAO1	ENSG00000101323	66.8935	53.3496	-13.5439	63.4793	27.167	-36.3123	-45.2779	-3.0677	0.0645741
chr20	8730082	8730112	31	12406	protein_coding	PLCB1	ENSG00000182621	12406	PLCB1	ENSG00000182621	71.8692	51.4314	-20.4378	77.7199	47.0559	-30.664	-28.3014	-3.00534	0.0684508
chr20	8730873	8731683	811	13197	protein_coding	PLCB1	ENSG00000182621	13197	PLCB1	ENSG00000182621	74.5517	52.2177	-22.334	73.4406	41.0173	-32.4233	-27.8948	-3.72461	0.0662688
chr20	9019887	9020660	774	26894	miRNA	AL121898.1	ENSG00000252819	-28749	PLCB4	ENSG00000101333	70.1902	50.048	-20.1422	76.103	29.5768	-46.5262	-26.2491	-3.0286	0.0688876
chr20	11519973	11520313	341	69382	processed_pseudogene	RP5-1128N12.2	ENSG00000271397	-351057	BTBD3	ENSG00000132640	61.3083	49.7293	-11.579	80.0724	43.8154	-36.2571	-25.9397	-3.62027	0.0594837
chr20	12057855	12059179	1325	155640	processed_transcript	BTBD3	ENSG00000132640	158355	BTBD3	ENSG00000132640	45.6343	26.6169	-19.0174	80.66	6.7324	-73.9276	-25.1135	-3.06527	0.0555801
chr20	18771142	18771875	734	2761	lincRNA	LINC00652	ENSG00000179935	-22494	SCP2D1	ENSG00000132631	51.1667	36.7742	-14.3925	69.4592	4.42238	-65.0368	-25.1075	-3.0518	0.0550488
chr20	24638677	24638959	283	-21223	lincRNA	RP5-860P4.2	ENSG00000231015	188841	SYNDIG1	ENSG00000101463	51.9807	32.7994	-19.1813	76.4558	30.7074	-45.7484	-24.7817	-3.00801	0.0550098
chr20	32719218	32719351	134	8941	processed_pseudogene	RPS2P1	ENSG00000225246	-19079	EIF2S2	ENSG00000125977	73.184	49.5451	-23.6389	89.5183	49.8828	-39.6355	-21.473	-3.00701	0.061803
chr20	32719656	32719730	75	9379	processed_pseudogene	RPS2P1	ENSG00000225246	-19517	EIF2S2	ENSG00000125977	83.0206	63.8347	-19.1859	86.9202	48.2683	-38.6519	-21.3011	-3.02691	0.0741425
chr20	33761948	33762110	163	2071	protein_coding	PROCR	ENSG00000101000	2071	PROCR	ENSG00000101000	86.1477	62.7871	-23.3606	88.8806	57.3203	-31.5604	-12.9373	-3.0211	0.0567088
chr20	36859967	36860855	889	-4345	protein_coding	KIAA1755	ENSG00000149633	-4345	KIAA1755	ENSG00000149633	81.4595	61.3415	-20.118	69.8332	33.9921	-35.8411	-12.6841	-3.01637	0.0579188
chr20	39248645	39249042	398	68455	protein_coding	MAFB	ENSG00000204103	68455	MAFB	ENSG00000204103	61.2476	41.5461	-19.7016	74.3871	43.515	-30.872	-11.567	-3.64145	0.0557642
chr20	47013735	47014175	441	-96	lincRNA	RP1-66N13.1	ENSG00000236874	430244	PREX1	ENSG00000124126	74.0603	54.4904	-19.5699	74.9052	19.744	-55.1612	-9.27348	-3.03851	0.0561785
chr20	47442869	47443544	676	875	protein_coding	PREX1	ENSG00000124126	875	PREX1	ENSG00000124126	69.0355	36.2544	-32.7811	71.2736	35.2164	-36.0572	-96.1692	-3.01629	0.0626826
chr20	57358053	57359485	1433	0	unprocessed_pseudogene	PIEZO1P2	ENSG00000237121	-55287	GNAS	ENSG00000087460	52.8305	31.5601	-21.2704	76.9771	38.0798	-38.8973	-79.5867	-3.26302	0.0556908
chr20	59057962	59058135	174	4792	miRNA	MIR4533	ENSG00000266140	426981	C20orf197	ENSG00000176659	36.7002	23.9364	-12.7637	56.6204	8.54841	-48.072	-76.0002	-3.00035	0.0701156
chr20	59632135	59632417	283	20454	lincRNA	RP5-827L5.2	ENSG00000229755	-195064	CDH4	ENSG00000179242	37.365	22.4864	-14.8786	58.4302	4.50678	-53.9235	-70.4092	-3.01798	0.0688816
chr20	59710121	59710838	718	55924	lincRNA	RP5-827L5.1	ENSG00000229606	-116643	CDH4	ENSG00000179242	44.9449	24.5746	-20.3703	49.3549	9.91869	-39.4363	-67.5284	-3.58853	0.0586863
chr20	60415138	60415817	680	-85025	antisense	RP11-429E11.2	ENSG00000225106	-120333	RP11-429E11.3	ENSG00000179253	56.0507	24.7852	-31.2655	73.6608	21.2003	-52.4605	-64.4456	-3.12716	0.0684124
chr20	60435481	60435833	353	92884	miRNA	MIR1257	ENSG00000221417	137409	TAF4	ENSG00000130699	65.0837	47.9399	-17.1437	53.0823	19.0844	-33.9979	-60.0733	-3.09756	0.0557963
chr20	61897955	61897970	16	6075	protein_coding	NKAIN4	ENSG00000101198	6075	NKAIN4	ENSG00000101198	53.0158	36.2994	-16.7164	76.7006	28.8323	-47.8683	-48.2145	-3.01407	0.0712972
chr20	61955418	61955634	217	-30	retained_intron	COL20A1	ENSG00000101203	3966	COL20A1	ENSG00000101203	59.042	41.8775	-17.1645	77.5606	45.1574	-32.4033	-45.6865	-3.11014	0.0582727
chr20	62095162	62095346	185	8515	protein_coding	KCNQ2	ENSG00000075043	8515	KCNQ2	ENSG00000075043	55.3798	38.4686	-16.9112	38.4388	4.5304	-33.9084	-34.0463	-3.02401	0.0582965
chr21	17497741	17497921	181	-3776	processed_pseudogene	RPS26P5	ENSG00000224602	282903	USP25	ENSG00000155313	52.5433	28.1872	-24.3561	75.4582	10.957	-64.5012	-33.8509	-3.00038	0.0710643
chr21	17498256	17498347	92	-4291	processed_pseudogene	RPS26P5	ENSG00000224602	283418	USP25	ENSG00000155313	50.8583	26.7228	-24.1356	75.1527	10.733	-64.4197	-29.6181	-3.03615	0.0569164
chr21	17681611	17682835	1225	-1156	lincRNA	AP001172.2	ENSG00000270071	466773	USP25	ENSG00000155313	82.1914	38.5905	-43.6009	86.3952	3.65759	-82.7376	-25.0745	-3.01684	0.055931
chr21	17798550	17798815	266	5774	lincRNA	LINC00478	ENSG00000215386	583712	USP25	ENSG00000155313	40.5546	14.8439	-25.7108	79.9385	19.7067	-60.2317	-24.0644	-3.00158	0.0564621
chr21	17799198	17799751	554	6422	lincRNA	LINC00478	ENSG00000215386	584360	USP25	ENSG00000155313	57.7366	27.084	-30.6525	89.0075	25.7245	-63.283	-19.9074	-3.19852	0.0561159
chr21	17800169	17800307	139	7393	lincRNA	LINC00478	ENSG00000215386	585331	USP25	ENSG00000155313	71.6887	47.39	-24.2987	92.5515	29.9268	-62.6247	-19.5392	-3.04202	0.0566584
chr21	19619556	19619987	432	1363	protein_coding	CHODL	ENSG00000154645	1363	CHODL	ENSG00000154645	65.2971	43.0151	-22.282	88.7429	9.93527	-78.8076	-18.4777	-3.04126	0.0556908
chr21	27013270	27013525	256	1359	protein_coding	JAM2	ENSG00000154721	1359	JAM2	ENSG00000154721	54.2822	34.9512	-19.3311	59.0507	9.71505	-49.3357	-17.8903	-3.17256	0.0563076
chr21	28340371	28340551	181	-1538	protein_coding	ADAMTS5	ENSG00000154736	-1538	ADAMTS5	ENSG00000154736	71.005	45.8109	-25.1942	84.1041	49.5553	-34.5488	-16.1194	-3.03336	0.0570068
chr21	32848185	32848457	273	23405	processed_pseudogene	AP000563.2	ENSG00000237325	82832	TIAM1	ENSG00000156299	48.8163	27.8144	-21.0018	78.107	38.9777	-39.1293	-15.6123	-3.08739	0.0817386
chr21	36081743	36082199	457	27278	lincRNA	LINC00160	ENSG00000230978	40054	CLIC6	ENSG00000159212	62.1184	46.4354	-15.6831	86.7579	50.4541	-36.3038	-15.4267	-3.015	0.0558672
chr21	36444982	36445543	562	-7612	processed_transcript	RUNX1	ENSG00000159216	-23340	RUNX1	ENSG00000159216	59.1616	40.4596	-18.702	81.399	17.3962	-64.0028	-12.6989	-3.07027	0.0576695
chr21	36446122	36446279	158	-8752	processed_transcript	RUNX1	ENSG00000159216	-24480	RUNX1	ENSG00000159216	60.5864	41.8459	-18.7405	83.6076	15.23	-68.3776	-12.523	-3.85686	0.0560591
chr21	36935894	36936790	897	16267	processed_transcript	RUNX1	ENSG00000159216	333936	FKSG68	ENSG00000267812	60.0953	32.7218	-27.3735	75.2291	8.25658	-66.9726	-10.4012	-3.3414	0.0556908
chr21	36937613	36937670	58	15387	processed_transcript	RUNX1	ENSG00000159216	333056	FKSG68	ENSG00000267812	56.8585	31.8478	-25.0107	66.0963	7.19395	-58.9023	-10.3409	-3.41687	0.0556908
chr21	39720571	39722061	1491	-15227	lincRNA	AP001422.3	ENSG00000231231	51722	KCNJ15	ENSG00000157551	72.0968	50.2608	-21.836	78.4538	17.0526	-61.4012	-9.81353	-3.11029	0.0691728
chr21	44494464	44494779	316	-845	processed_transcript	CBS	ENSG00000160200	1161	CBS	ENSG00000160200	53.7016	30.4764	-23.2251	45.9267	9.68506	-36.2416	-9.7662	-3.08412	0.0556908
chr21	47403740	47404137	398	2088	protein_coding	COL6A1	ENSG00000142156	2088	COL6A1	ENSG00000142156	71.1561	43.8325	-27.3236	93.0995	10.2674	-82.8322	-74.8731	-3.048	0.0536673
chr21	47487425	47487762	338	4399	processed_pseudogene	PSMA6P3	ENSG00000233767	-30248	COL6A2	ENSG00000142173	77.4275	54.2969	-23.1306	81.9372	46.4338	-35.5034	-45.8834	-3.00924	0.0548259
chr22	27972262	27973953	1692	-2727	lincRNA	RP1-231P7P.1	ENSG00000224027	223532	MN1	ENSG00000169184	78.1704	48.5266	-29.6438	64.2341	24.9345	-39.2996	-42.3479	-3.08322	0.0536673
chr22	28034930	28035561	632	-65395	lincRNA	RP1-231P7P.1	ENSG00000224027	161924	MN1	ENSG00000169184	70.4047	50.2673	-20.1374	65.1134	28.1421	-36.9713	-28.9291	-3.03741	0.0595328
chr22	28180755	28181832	1078	6038	processed_transcript	MN1	ENSG00000169184	15653	MN1	ENSG00000169184	59.4333	24.4147	-35.0186	85.5493	48.5808	-36.9685	-24.6837	-3.04383	0.0581509
chr22	29588966	29589803	838	-1169	snRNA	RNU6-1219P	ENSG00000251952	-12036	EMID1	ENSG00000186998	52.6402	31.2572	-21.383	82.6066	50.7842	-31.8224	-21.1947	-3.01616	0.0544981
chr22	37435350	37435632	283	-12146	protein_coding	KCTD17	ENSG00000100379	-12146	KCTD17	ENSG00000100379	77.8106	58.2329	-19.5777	92.3633	48.64	-43.7233	-21.0379	-3.12467	0.0643704
chr22	38134538	38134755	218	-7479	protein_coding	TRIOBP	ENSG00000100106	-7479	TRIOBP	ENSG00000100106	46.0914	30.2477	-15.8437	75.8455	28.4571	-47.3884	-19.4112	-3.0154	0.0552609
chr22	44703391	44703623	233	5107	protein_coding	KIAA1644	ENSG00000138944	5107	KIAA1644	ENSG00000138944	82.3736	52.3416	-30.0319	79.9123	36.9374	-42.975	-18.5854	-3.02999	0.0551068
chr22	46454920	46455026	107	-879	lincRNA	RP6-109B7.2	ENSG00000231010	-4895	C22orf26	ENSG00000182257	71.7004	47.8435	-23.8569	61.7954	1.40469	-60.3907	-15.9986	-3.03026	0.0587616
chr22	46460965	46461174	210	4596	antisense	RP6-109B7.4	ENSG00000235159	-10940	C22orf26	ENSG00000182257	65.6622	26.8398	-38.8225	32.1612	0.18346	-31.9778	-13.1201	-3.17462	0.0536673
chr22	47466784	47466848	65	222980	miRNA	Z97351.1	ENSG00000221672	296959	TBC1D22A	ENSG00000054611	75.6866	46.0338	-29.6528	85.2208	45.2668	-39.954	-10.4441	-3.4212	0.0536673
chr22	49440981	49442016	1036	152251	lincRNA	WI2-81516E3.1	ENSG00000205632	351921	FAM19A5	ENSG00000219438	34.6232	16.0404	-18.5828	66.7171	22.061	-44.6561	-10.1012	-3.21505	0.0708024
chr22	49794306	49794737	432	24348	processed_transcript	C22orf34	ENSG00000188511	256340	C22orf34	ENSG00000188511	51.0373	34.1039	-16.9334	70.9718	4.33932	-66.6324	-9.60748	-3.19309	0.0552785
chrX	7249154	7249911	758	111656	protein_coding	STS	ENSG00000101846	111656	STS	ENSG00000101846	73.9342	49.4034	-24.5308	74.8887	32.4901	-42.3986	-45.6145	-3.03415	0.070515
chrX	16576619	16577147	529	-19056	misc_RNA	RN7SL658P	ENSG00000239333	-91133	S100G	ENSG00000169906	69.7504	45.0951	-24.6553	89.1779	45.0388	-44.1391	-43.6017	-3.03814	0.0697991
chrX	37093449	37093777	329	2696	unprocessed_pseudogene	RP11-31H15.2	ENSG00000214071	67016	FAM47C	ENSG00000198173	42.9592	27.9411	-15.0181	63.3676	14.3749	-48.9927	-24.621	-3.44282	0.0678233
chrX	47443370	47443804	435	-936	protein_coding	TIMP1	ENSG00000102265	-936	TIMP1	ENSG00000102265	54.9008	27.4656	-27.4352	74.0975	40.0882	-34.0092	-16.4352	-5.4045	0.0681308
chrX	47579697	47579808	112	-1198	processed_pseudogene	RP1-212G6.4	ENSG00000224656	-61136	UXT	ENSG00000126756	74.8005	57.1375	-17.663	80.5864	25.243	-55.3434	-15.847	-3.10362	0.0717799
chrX	62976440	62976597	158	-1408	protein_coding	ARHGEF9	ENSG00000131089	-1408	ARHGEF9	ENSG00000131089	73.6727	49.5393	-24.1334	85.2131	41.2816	-43.9314	-14.1174	-3.44533	0.0697293
chrX	70585081	70585130	50	-983	protein_coding	TAF1	ENSG00000147133	-983	TAF1	ENSG00000147133	64.0182	42.6184	-21.3997	52.833	10.0326	-42.8004	-13.2593	-4.31163	0.0744493
chrX	114465698	114466014	317	2613	protein_coding	LRCH2	ENSG00000130224	2613	LRCH2	ENSG00000130224	60.7109	31.1245	-29.5864	78.1157	37.085	-41.0307	-13.0117	-3.14609	0.0674671
chrX	114689454	114689976	523	0	processed_pseudogene	RP5-878I13.2	ENSG00000271021	-105532	PLS3	ENSG00000102024	71.6041	49.0175	-22.5866	85.4577	44.4738	-40.9839	-11.6921	-3.85345	0.071357
chrX	117664320	117664603	284	34447	protein_coding	DOCK11	ENSG00000147251	34447	DOCK11	ENSG00000147251	76.6734	39.8391	-36.8343	79.8516	20.3075	-59.5441	-10.8027	-3.50463	0.0728575
chrX	128976165	128976348	184	-364	protein_coding	ZDHHC9	ENSG00000188706	-364	ZDHHC9	ENSG00000188706	69.238	32.9038	-36.3342	80.5086	48.6643	-31.8444	-10.3021	-3.31338	0.0691768
chrX	145703582	145703734	153	-1479	processed_pseudogene	RP1-203P18.1	ENSG00000231686	794653	TMEM257	ENSG00000221870	69.0332	46.1535	-22.8797	74.9023	15.1949	-59.7074	-9.76466	-3.16574	0.0673286
