# Supplementary material for: Enduring epigenetic landmarks define the cancer microenvironment
Source: HighWire-hosted journal article supplement (doi:10.1101/gr.229070.117), 2018-04-12
Supplement: Supplemental_Table_S9.xlsx [file Supplemental_Table_S9.xlsx]

## Sheet: Supplemental Table S9
Supplemental Table S9: Common differentially methylated regions between prostatic fibroblasts, epithelial cells and normal versus cancer tissue from TCGA
Common DMRs in NPFs vs CAFs and PreC vs LNCaP
# CAF-NPF DMRs that are similarly differentially methylated in LNCaP compared to PrEC (with >30% change), and in normal versus tumour samples in TCGA
# The closest gene and closest protein-coding gene are shown for each DMR.
1 For the distance of DMRs to the TSS, positive values indicate that the DMR lies downstream of the TSS, while negative values indicate that the DMR lies upstream of the TSS.
Hypermethylated DMRs
Chromosome	Start	End	Width	Distance to Closest TSS 1	Closest Transcript Type	Closest Gene Name	Closest Gene ID	Distance to Closest Protein-coding TSS 1	Closest Protein-coding Gene Name	Closest Protein-coding Gene ID	NPF Mean Methylation	CAF Mean Methylation	Mean Difference % (Fibroblasts)	PrEC Mean Methylation	LNCaP Mean Methylation	Mean Difference (Epithelial) (%)	Mean TCGA Normal Methylation (%)	Mean TCGA Cancer Methylation (%)	Mean Difference (TCGA) (%)	P Value	FDR	AUC	HM450 probes
chr1	8272230	8272440	211	3497	lincRNA	RP11-431K24.3	ENSG00000227634	-105445	SLC45A1	ENSG00000162426	58.0451	73.9251	15.88	2.10013	68.0267	65.9266	50.4367	64.3196	13.8828	7.40913e-11	1.61519e-10	0.808617	cg06780032
chr1	12192849	12193536	688	6857	processed_transcript	TNFRSF8	ENSG00000120949	6892	TNFRSF8	ENSG00000120949	43.7546	68.9821	25.2275	25.9607	72.3758	46.4151	27.1131	44.952	17.8389	8.42657e-19	5.10276e-18	0.852041	cg20820107
chr1	15743598	15744163	566	6836	protein_coding	EFHD2	ENSG00000142634	6836	EFHD2	ENSG00000142634	39.6351	53.2451	13.6101	13.6876	82.9573	69.2697	54.1659	61.7483	7.58241	3.55237e-06	5.30422e-06	0.70941	cg14036402
chr1	16499612	16500274	663	13850	antisense	RP11-276H7.3	ENSG00000224621	-17029	EPHA2	ENSG00000142627	36.4996	62.1954	25.6959	18.2243	57.9899	39.7656	61.8157	72.9761	11.1604	4.87934e-07	7.59782e-07	0.77415	cg18787437
chr1	24469102	24469906	805	0	protein_coding	IL22RA1	ENSG00000142677	0	IL22RA1	ENSG00000142677	28.978	50.7037	21.7257	11.0143	46.1937	35.1794	18.5935	22.9152	4.32161	0.000233376	0.000302834	0.598923	cg09152089;cg21293216;cg25946374
chr1	47078935	47079028	94	1776	protein_coding	MOB3C	ENSG00000142961	1776	MOB3C	ENSG00000142961	36.896	54.3392	17.4432	46.785	84.8587	38.0737	47.2701	66.0503	18.7802	1.37346e-14	4.40316e-14	0.879308	cg18690385
chr1	54952650	54952901	252	-17439	miRNA	AC099796.1	ENSG00000265404	-60999	ACOT11	ENSG00000162390	40.4901	66.3306	25.8405	23.5333	79.2474	55.7142	26.7338	48.6352	21.9014	5.05174e-24	7.86628e-23	0.845918	cg00868131
chr1	161575992	161576063	72	-17	unprocessed_pseudogene	HSPA7	ENSG00000225217	10648	FCGR2C	ENSG00000244682	14.0993	32.2102	18.1108	40.5153	79.8783	39.363	34.83	42.9833	8.15335	1.05853e-07	1.77507e-07	0.770408	cg10815343
chr1	203045221	203045340	120	89	processed_transcript	PPFIA4	ENSG00000143847	9823	MYOG	ENSG00000122180	27.4697	48.7408	21.2711	15.4429	72.563	57.1201	35.9658	46.4421	10.4763	4.65599e-06	6.76671e-06	0.695805	cg09396704
chr1	221054337	221054499	163	0	protein_coding	HLX	ENSG00000136630	0	HLX	ENSG00000136630	14.1388	38.7004	24.5616	12.2967	85.8182	73.5215	37.7356	60.0521	22.3165	1.24847e-14	4.12372e-14	0.845181	cg20454002
chr1	225837005	225838930	1926	1487	protein_coding	ENAH	ENSG00000154380	1487	ENAH	ENSG00000154380	19.5862	66.8322	47.246	32.0219	87.7126	55.6907	36.9487	47.6999	10.7511	2.3174e-05	3.18027e-05	0.671485	cg13305444
chr2	43385484	43386565	1082	-55654	lincRNA	AC093609.1	ENSG00000230587	67182	ZFP36L2	ENSG00000152518	35.464	61.9827	26.5187	6.68371	62.0812	55.3975	12.5372	16.7588	4.22168	9.74135e-07	1.47473e-06	0.665249	cg23787321
chr2	240035582	240036058	477	-5781	retained_intron	HDAC4	ENSG00000068024	26610	HDAC4	ENSG00000068024	21.9629	45.9019	23.939	29.3042	72.4691	43.1649	21.2825	35.9394	14.6569	2.81538e-15	9.89925e-15	0.728855	cg05758467
chr3	4867340	4868477	1138	4555	processed_transcript	AC018816.3	ENSG00000235978	58994	AC018816.3	ENSG00000235978	38.2531	61.4795	23.2264	16.6419	56.3084	39.6665	10.5612	13.7239	3.16271	7.88039e-06	1.11554e-05	0.545351	cg21407899
chr3	11677935	11678156	222	-2789	processed_transcript	VGLL4	ENSG00000144560	7241	VGLL4	ENSG00000144560	26.3381	46.6438	20.3057	26.8815	61.2323	34.3508	54.6969	69.7016	15.0047	1.06635e-12	2.70308e-12	0.842063	cg19880542
chr3	122888209	122888548	340	19022	nonsense_mediated_decay	PDIA5	ENSG00000065485	-32256	SEC22A	ENSG00000121542	59.7534	77.7982	18.0448	51.3996	84.5704	33.1709	40.7257	57.8829	17.1572	3.66871e-09	7.0156e-09	0.772562	cg12080157
chr3	125898467	125898783	317	0	protein_coding	ALDH1L1	ENSG00000144908	0	ALDH1L1	ENSG00000144908	17.9667	36.1915	18.2248	9.25042	62.8497	53.5993	16.0243	46.1696	30.1452	1.85859e-21	1.84169e-20	0.898356	cg27282530
chr3	159557493	159557888	396	0	retained_intron	SCHIP1	ENSG00000151967	0	SCHIP1	ENSG00000151967	66.3525	86.2642	19.9117	43.3836	74.3568	30.9731	46.1252	54.3453	8.22004	2.96808e-05	3.99408e-05	0.693141	cg25705519;cg00188627;cg15180789
chr3	159942159	159942453	295	632	antisense	IL12A-AS1	ENSG00000244040	-969	C3orf80	ENSG00000180044	48.0864	67.1313	19.0449	28.4587	84.6014	56.1428	20.3509	46.0622	25.7114	6.69653e-19	4.29366e-18	0.897279	cg03281561
chr4	152329013	152329364	352	622	lincRNA	RP11-610P16.1	ENSG00000251611	-1033	FAM160A1	ENSG00000164142	31.5184	51.4337	19.9153	0.97332	87.155	86.1817	16.2945	24.7899	8.49539	1.1232e-07	1.85498e-07	0.619444	cg17217059
chr5	10138385	10139187	803	1134	lincRNA	CTD-2199O4.1	ENSG00000249807	110810	FAM173B	ENSG00000150756	37.6581	54.3178	16.6597	47.8849	84.4095	36.5246	46.4217	61.264	14.8422	2.13894e-09	4.31749e-09	0.805896	cg09135347
chr5	14405999	14406732	734	0	retained_intron	TRIO	ENSG00000038382	-81824	TRIO	ENSG00000038382	37.9599	56.6233	18.6634	40.7055	88.8964	48.1909	71.3196	74.8669	3.54726	0.00157131	0.00194629	0.6589	cg26689441;cg14612133;cg26060817;cg04646987
chr5	102089760	102089883	124	74	protein_coding	PAM	ENSG00000145730	74	PAM	ENSG00000145730	42.9146	60.7832	17.8687	25.4853	86.6046	61.1193	55.2135	66.8371	11.6236	2.10345e-07	3.32285e-07	0.742687	cg26671988
chr5	112538252	112540106	1855	0	processed_transcript	MCC	ENSG00000171444	30267	MCC	ENSG00000171444	46.1461	82.4128	36.2667	10.811	75.4216	64.6106	32.2277	68.5631	36.3354	1.82674e-21	1.84169e-20	0.919955	cg21081729;cg26676468
chr5	141060549	141060750	202	-150	protein_coding	ARAP3	ENSG00000120318	-150	ARAP3	ENSG00000120318	41.2545	62.8942	21.6397	10.6844	62.1195	51.4351	40.6344	50.4244	9.78998	5.86982e-07	9.01141e-07	0.654252	cg13712023
chr6	1335620	1336426	807	22944	protein_coding	FOXQ1	ENSG00000164379	22944	FOXQ1	ENSG00000164379	45.2849	65.2429	19.958	17.2423	68.1029	50.8606	25.0165	45.7989	20.7824	1.57206e-18	9.01863e-18	0.835091	cg15105476
chr6	3229867	3230421	555	-1215	nonsense_mediated_decay	PSMG4	ENSG00000180822	-1619	PSMG4	ENSG00000180822	7.96766	31.2642	23.2966	17.625	49.8185	32.1936	56.6683	69.5613	12.893	3.16765e-05	4.15992e-05	0.7178	cg00651400
chr6	14785034	14785321	288	138267	snRNA	RNU6-793P	ENSG00000206960	-461205	JARID2	ENSG00000008083	35.5659	67.2401	31.6742	16.0482	72.9039	56.8557	53.3034	72.4603	19.1569	1.94504e-13	5.43613e-13	0.865816	cg04573845
chr6	37667310	37667518	209	-227	protein_coding	MDGA1	ENSG00000112139	-227	MDGA1	ENSG00000112139	54.5986	74.1687	19.57	29.9245	68.7741	38.8496	44.0905	56.263	12.1726	4.20896e-13	1.14694e-12	0.807653	cg13602274
chr6	41341883	41342721	839	18695	miRNA	AL136967.1	ENSG00000238867	38293	NCR2	ENSG00000096264	19.4749	56.0484	36.5735	6.13193	56.5087	50.3768	19.5278	33.135	13.6071	2.4314e-15	8.83408e-15	0.850737	cg00210473;cg21052660;cg17609158
chr6	41907087	41907252	166	-1082	processed_transcript	CCND3	ENSG00000112576	1211	CCND3	ENSG00000112576	29.2331	50.3742	21.1411	61.5219	92.8171	31.2952	75.097	78.2728	3.17578	0.00089834	0.00113859	0.671372	cg05568549
chr6	43045360	43045686	327	807	protein_coding	PTK7	ENSG00000112655	807	PTK7	ENSG00000112655	32.7419	53.8199	21.078	9.45591	58.2985	48.8426	43.4685	59.1372	15.6687	3.8519e-16	1.44778e-15	0.864512	cg15123159
chr6	109760582	109760831	250	875	protein_coding	PPIL6	ENSG00000185250	875	PPIL6	ENSG00000185250	22.5266	46.1946	23.668	16.9364	91.6332	74.6969	23.5026	38.6824	15.1799	2.23316e-18	1.21707e-17	0.71695	cg23978557;cg20811607
chr7	100463490	100464384	895	-375	protein_coding	TRIP6	ENSG00000087077	-375	TRIP6	ENSG00000087077	57.9899	82.3159	24.326	0.970834	38.6584	37.6875	27.8558	38.3331	10.4773	1.73368e-14	5.24921e-14	0.859467	cg19279257;cg26305174;cg04742719;cg01008256;cg12967723
chr7	105137023	105137966	944	-1228	retained_intron	PUS7	ENSG00000091127	10615	PUS7	ENSG00000091127	64.1238	86.9564	22.8326	43.3192	91.644	48.3248	39.5209	73.2389	33.7179	7.68121e-18	3.64023e-17	0.920975	cg13617795
chr7	154996722	154997145	424	864	lincRNA	AC099552.3	ENSG00000228521	-6575	AC099552.4	ENSG00000217825	23.6059	42.0438	18.438	28.629	74.2312	45.6022	26.6277	30.9973	4.36963	0.030826	0.0353688	0.559921	cg08890477
chr8	26721306	26721766	461	726	protein_coding	ADRA1A	ENSG00000120907	726	ADRA1A	ENSG00000120907	13.7157	37.7175	24.0017	16.9498	71.0567	54.1069	31.3596	47.097	15.7374	2.49579e-09	4.94621e-09	0.773526	cg09557462
chr8	49783652	49783907	256	-42511	processed_pseudogene	RP11-22C8.1	ENSG00000233109	50080	SNAI2	ENSG00000019549	17.1632	57.5683	40.4051	42.5875	83.9324	41.3449	65.2227	78.4557	13.233	4.5387e-11	1.03066e-10	0.864909	cg18891824;cg13372658
chr8	56791576	56791649	74	-722	protein_coding	LYN	ENSG00000254087	-722	LYN	ENSG00000254087	26.0613	49.6428	23.5815	1.71667	78.6289	76.9122	16.1967	23.7158	7.51907	9.27009e-12	2.19661e-11	0.691327	cg03973663;cg17806401
chr8	74004343	74004855	513	651	protein_coding	SBSPON	ENSG00000164764	651	SBSPON	ENSG00000164764	20.3161	40.9026	20.5865	17.6886	76.7938	59.1051	31.3969	52.6183	21.2214	1.43465e-17	6.51571e-17	0.885091	cg02251349
chr9	139889630	139890134	505	64	processed_transcript	CLIC3	ENSG00000169583	1120	CLIC3	ENSG00000169583	28.0569	47.6999	19.643	52.7633	88.8404	36.077	69.8389	74.0059	4.16706	0.000384064	0.000492506	0.667574	cg04471485
chr10	11911816	11912535	720	172	protein_coding	PROSER2	ENSG00000148426	172	PROSER2	ENSG00000148426	9.68751	51.4709	41.7834	58.6114	89.3063	30.6949	58.0802	74.2182	16.1381	4.50034e-09	8.45754e-09	0.818594	cg08584759;cg06953130
chr10	73019668	73021280	1613	-41682	antisense	UNC5B-AS1	ENSG00000237512	46983	UNC5B	ENSG00000107731	26.2245	63.3237	37.0992	30.1974	66.5004	36.303	25.6877	40.995	15.3073	5.08885e-17	2.1334e-16	0.880442	cg17668756
chr10	77155990	77156551	562	-4207	processed_transcript	ZNF503-AS2	ENSG00000237149	5038	ZNF503	ENSG00000165655	25.8502	68.9268	43.0766	19.3611	74.7775	55.4163	56.1617	71.4249	15.2632	5.38822e-06	7.72784e-06	0.772506	cg20659435;cg15701794
chr10	77157345	77157840	496	-2918	processed_transcript	ZNF503-AS2	ENSG00000237149	3749	ZNF503	ENSG00000165655	9.43399	44.7184	35.2845	5.53028	89.1708	83.6405	35.1604	55.9149	20.7545	5.72984e-13	1.5233e-12	0.819501	cg16912563;cg14533595
chr11	34621852	34622831	980	-19808	processed_transcript	EHF	ENSG00000135373	-19826	EHF	ENSG00000135373	28.6027	46.1383	17.5356	8.28075	65.1914	56.9107	29.6016	58.971	29.3695	8.27798e-27	3.00767e-25	0.919898	cg13080487
chr11	62573814	62573880	67	-39	protein_coding	NXF1	ENSG00000162231	-39	NXF1	ENSG00000162231	45.3828	62.8813	17.4985	42.6474	86.4568	43.8094	62.7096	70.9728	8.26321	7.7044e-10	1.58449e-09	0.772336	cg08496737
chr11	67815229	67815863	635	287	retained_intron	TCIRG1	ENSG00000110719	-1649	TCIRG1	ENSG00000110719	60.5465	81.8807	21.3342	54.4467	86.526	32.0793	72.4984	82.0325	9.53411	3.24771e-10	6.80769e-10	0.862188	cg26389053;cg02322435
chr11	68095405	68095766	362	15252	nonsense_mediated_decay	LRP5	ENSG00000162337	15327	LRP5	ENSG00000162337	42.5115	62.8299	20.3183	22.2521	74.3884	52.1363	22.0095	46.8078	24.7983	5.3808e-31	5.86508e-29	0.856633	cg13146674;cg02793948
chr11	86510363	86510915	553	-366	protein_coding	PRSS23	ENSG00000150687	-366	PRSS23	ENSG00000150687	38.4991	70.079	31.5799	55.2002	94.969	39.7688	59.0345	70.1572	11.1227	7.08351e-13	1.83834e-12	0.84042	cg11660018
chr12	3373257	3373614	358	-8463	processed_transcript	TSPAN9	ENSG00000011105	62915	TSPAN9	ENSG00000011105	34.1279	55.2661	21.1381	32.1123	76.6065	44.4942	45.6465	68.0792	22.4327	1.0359e-13	2.9714e-13	0.894898	cg00954841
chr12	22777318	22777558	241	390	antisense	RP11-268P4.4	ENSG00000257023	-450	ETNK1	ENSG00000139163	44.7036	65.6489	20.9453	46.6847	79.6309	32.9463	60.6704	69.8884	9.218	4.78591e-08	8.55187e-08	0.736281	cg17839399;cg21477262;cg02723291
chr12	54353721	54354222	502	3402	lincRNA	AC012531.23	ENSG00000271090	5102	HOXC12	ENSG00000123407	20.1105	38.0155	17.905	33.5756	72.2662	38.6906	36.185	41.7122	5.52717	0.0025318	0.00310074	0.615816	cg02537491
chr12	115101828	115105547	3720	-5960	misc_RNA	Y_RNA	ENSG00000199220	15847	TBX3	ENSG00000135111	3.80596	67.6292	63.8233	3.13679	90.0008	86.8641	22.2264	29.9671	7.74074	2.33415e-05	3.18027e-05	0.606009	cg25626611;cg07211768;cg14738806;cg26620530;cg17070988;cg16945186;cg26343001;cg05678033;cg03510605;cg25718766;cg02154345;cg14987787;cg00723994;cg00095523;cg22741264
chr12	115123415	115123757	343	-1445	protein_coding	TBX3	ENSG00000135111	-1445	TBX3	ENSG00000135111	10.0002	49.379	39.3788	7.67839	92.7823	85.1039	21.9354	45.7019	23.7665	1.03295e-27	5.62959e-26	0.915986	cg03281981
chr12	115128419	115129506	1088	-6449	protein_coding	TBX3	ENSG00000135111	-6449	TBX3	ENSG00000135111	18.3296	56.2733	37.9436	3.99498	68.7616	64.7667	14.1975	37.6915	23.494	4.38501e-19	2.98729e-18	0.812358	cg02824888;cg10297792
chr12	115131142	115132889	1748	-9172	protein_coding	TBX3	ENSG00000135111	-9172	TBX3	ENSG00000135111	28.1227	67.9492	39.8265	6.54188	66.9228	60.381	22.6601	49.7206	27.0605	1.84017e-23	2.50723e-22	0.901587	cg00093686;cg09417809;cg00507008;cg26621770;cg12153794;cg03051777;cg23424407;cg04153838;cg24691910;cg13031611;cg06530563
chr12	125669529	125670011	483	-1370	processed_transcript	TMEM132B	ENSG00000139364	56436	AACS	ENSG00000081760	29.7948	58.4455	28.6507	15.8297	55.6793	39.8495	42.3776	53.2254	10.8478	1.7084e-14	5.24921e-14	0.832483	cg16243243
chr13	20989349	20989414	66	18570	miRNA	MIR4499	ENSG00000263978	110581	CRYL1	ENSG00000165475	39.9873	60.2961	20.3087	41.0942	84.3441	43.2499	62.0507	70.6064	8.55571	1.4422e-11	3.34469e-11	0.817177	cg11345143
chr13	31370217	31371618	1402	-5724	lincRNA	LINC00398	ENSG00000237879	60571	ALOX5AP	ENSG00000132965	14.7545	49.2295	34.4751	9.02306	42.3697	33.3466	30.3067	45.2298	14.9231	2.83143e-16	1.14306e-15	0.8178	cg24366665
chr14	24045501	24045901	401	1877	retained_intron	JPH4	ENSG00000092051	2092	JPH4	ENSG00000092051	28.0089	53.4152	25.4063	5.21062	80.9639	75.7532	16.5884	27.4654	10.8769	1.19185e-24	2.52934e-23	0.796372	cg15384598;cg05335975
chr14	71632302	71632791	490	-15381	lincRNA	RP6-91H8.2	ENSG00000259907	50670	AC004817.1	ENSG00000267901	38.5768	53.9965	15.4197	32.1429	71.3372	39.1944	44.8051	50.1347	5.32958	0.0199974	0.0236926	0.586338	cg15910301
chr14	104312558	104312748	191	473	nonsense_mediated_decay	PPP1R13B	ENSG00000088808	651	PPP1R13B	ENSG00000088808	61.9505	80.6459	18.6954	7.18719	60.0082	52.821	58.4515	68.7985	10.347	1.60963e-07	2.58014e-07	0.754819	cg03586793
chr16	809803	809962	160	-799	protein_coding	MSLN	ENSG00000102854	-799	MSLN	ENSG00000102854	36.9783	68.6406	31.6623	47.69	79.9403	32.2504	41.6567	47.7725	6.11573	0.0281086	0.0329445	0.598413	cg08185808
chr16	23153352	23153812	461	6778	protein_coding	USP31	ENSG00000103404	6778	USP31	ENSG00000103404	44.2875	73.2077	28.9202	26.2033	85.9707	59.7674	44.0016	69.0472	25.0456	6.05855e-18	3.00174e-17	0.904365	cg07213414
chr16	23154659	23154992	334	5598	protein_coding	USP31	ENSG00000103404	5598	USP31	ENSG00000103404	50.6337	74.4078	23.7741	38.6876	89.9566	51.2689	66.0267	77.5379	11.5112	4.35684e-14	1.2835e-13	0.889456	cg08966413
chr16	73066990	73067812	823	14461	protein_coding	ZFHX3	ENSG00000140836	14461	ZFHX3	ENSG00000140836	57.7061	79.0407	21.3346	40.8385	79.6649	38.8264	34.4795	54.8294	20.3499	7.83058e-23	9.4837e-22	0.905045	cg27262054
chr16	85254632	85254857	226	49749	protein_coding	CTC-786C10.1	ENSG00000262601	49749	CTC-786C10.1	ENSG00000262601	30.7061	59.0509	28.3448	28.7414	77.9887	49.2472	47.6743	70.3088	22.6345	4.14056e-17	1.80528e-16	0.901531	cg16796458
chr16	85404375	85405000	626	13305	protein_coding	RP11-680G10.1	ENSG00000261567	13305	RP11-680G10.1	ENSG00000261567	43.7027	73.2416	29.5389	12.0764	73.0073	60.9309	27.3946	49.574	22.1794	4.54144e-25	1.23754e-23	0.87449	cg06601581
chr17	406380	406912	533	0	antisense	RP5-1029F21.3	ENSG00000263015	-110649	FAM101B	ENSG00000183688	56.5685	74.4834	17.9149	29.3158	64.1997	34.8838	55.7301	68.7624	13.0323	1.31531e-07	2.13983e-07	0.746769	cg01214346
chr17	17280399	17280546	148	6779	processed_pseudogene	RPL13P12	ENSG00000215030	73749	NT5M	ENSG00000205309	54.7542	73.3639	18.6098	19.5737	66.6582	47.0845	35.0984	59.9878	24.8894	9.12598e-21	7.10522e-20	0.889909	cg19246977
chr17	48105649	48105900	252	27202	lincRNA	RP11-1094H24.4	ENSG00000246640	-27438	ITGA3	ENSG00000005884	43.5186	60.86	17.3413	1.75954	43.5155	41.756	15.6122	31.6314	16.0193	5.44616e-15	1.8551e-14	0.805215	cg16303129
chr17	59530251	59530701	451	471	protein_coding	TBX4	ENSG00000121075	471	TBX4	ENSG00000121075	20.1232	47.9181	27.7949	37.7613	89.632	51.8707	63.4709	74.1545	10.6837	6.08729e-08	1.0532e-07	0.801304	cg27079322
chr17	59531053	59531554	502	1273	protein_coding	TBX4	ENSG00000121075	1273	TBX4	ENSG00000121075	17.53	47.9089	30.3788	25.0259	70.7973	45.7713	57.4366	73.5361	16.0995	7.77345e-12	1.8829e-11	0.840646	cg23704195
chr17	59532315	59535195	2881	0	protein_coding	TBX4	ENSG00000121075	0	TBX4	ENSG00000121075	26.8589	60.8611	34.0022	41.2472	79.325	38.0779	56.1336	68.0101	11.8764	4.85771e-11	1.08059e-10	0.835204	cg04567731;cg09258804;cg03866607;cg22110896;cg14011845;cg18536148;cg06365535;cg24274579;cg00158789;cg25900280;cg03222323;cg17975443
chr17	60782592	60783283	692	-283	antisense	RP11-156L14.1	ENSG00000265702	23772	MRC2	ENSG00000011028	44.5958	66.4154	21.8196	8.30026	78.4355	70.1352	44.1119	50.7522	6.64025	0.00105073	0.00131643	0.605045	cg17050097;cg22796355
chr17	79138612	79139546	935	0	antisense	AATK-AS1	ENSG00000225180	270	AATK	ENSG00000181409	38.2025	61.7025	23.5	23.6753	63.5715	39.8962	42.1291	48.0416	5.91251	4.65409e-06	6.76671e-06	0.669444	cg05569220;cg06136185;cg11689732;cg26245256
chr17	79503203	79503292	90	30	retained_intron	FSCN2	ENSG00000186765	7644	FSCN2	ENSG00000186765	38.1115	59.4836	21.372	19.9317	83.2036	63.2718	33.7394	53.8022	20.0629	5.64619e-21	4.73411e-20	0.860488	cg13694281
chr17	79970877	79971570	694	0	retained_intron	ASPSCR1	ENSG00000169696	2189	ASPSCR1	ENSG00000169696	53.6236	74.7217	21.0981	38.0245	88.5267	50.5022	40.1732	56.0483	15.8751	2.49656e-18	1.29584e-17	0.860998	cg06105699
chr18	72125498	72125731	234	-318	protein_coding	FAM69C	ENSG00000187773	-318	FAM69C	ENSG00000187773	24.9167	50.3815	25.4648	13.5212	74.812	61.2908	32.8662	50.2809	17.4147	3.36846e-16	1.31129e-15	0.862698	cg13218688
chr19	5058597	5058961	365	11587	processed_transcript	KDM4B	ENSG00000127663	-23501	KDM4B	ENSG00000127663	39.71	67.2354	27.5254	53.0161	94.1877	41.1716	51.3864	64.8365	13.4501	5.83152e-09	1.07735e-08	0.794218	cg09547226
chr19	7937308	7937540	233	-934	protein_coding	CTD-3193O13.9	ENSG00000183248	-934	CTD-3193O13.9	ENSG00000183248	38.0959	53.2342	15.1383	49.9379	82.1597	32.2218	72.4451	76.5358	4.09064	0.00543261	0.0065795	0.640476	cg06468385
chr19	19007505	19007801	297	0	protein_coding	CERS1	ENSG00000223802	0	CERS1	ENSG00000223802	26.9836	45.217	18.2334	15.0465	51.6869	36.6404	22.9806	27.7771	4.79647	1.68275e-12	4.16864e-12	0.74983	cg10556682;cg19114310;cg04384638
chr19	35520556	35520872	317	-715	protein_coding	SCN1B	ENSG00000105711	-715	SCN1B	ENSG00000105711	38.479	55.2625	16.7835	33.324	68.7584	35.4345	18.0192	31.9608	13.9417	1.3923e-24	2.52934e-23	0.878231	cg00568555
chr19	46806592	46806912	321	0	protein_coding	HIF3A	ENSG00000124440	0	HIF3A	ENSG00000124440	53.4353	68.5793	15.144	59.767	91.3888	31.6218	72.7491	82.5427	9.79364	2.50614e-08	4.55281e-08	0.830102	cg01552731
chr20	50108972	50109526	555	-39457	miRNA	MIR3194	ENSG00000266761	49731	NFATC2	ENSG00000101096	34.2587	55.3597	21.101	14.0035	81.929	67.9255	30.4664	52.5646	22.0981	2.77202e-19	2.01433e-18	0.918934	cg02263932;cg09465142
chr20	55838700	55839384	685	1449	protein_coding	BMP7	ENSG00000101144	1449	BMP7	ENSG00000101144	32.1259	52.2186	20.0927	3.00034	36.9337	33.9333	16.3329	23.0782	6.74535	3.14594e-09	6.12336e-09	0.791723	cg07781736;cg26760589
chr21	35016784	35016982	199	-551	protein_coding	CRYZL1	ENSG00000205758	-551	CRYZL1	ENSG00000205758	7.87389	33.0699	25.196	34.1575	85.556	51.3985	65.9886	74.4147	8.42608	8.01028e-08	1.36425e-07	0.790703	cg02019444;cg16452651
chr21	40179770	40180152	383	-1407	protein_coding	ETS2	ENSG00000157557	-1407	ETS2	ENSG00000157557	39.6578	73.6175	33.9597	2.89745	90.5084	87.6109	39.604	56.7046	17.1007	5.04984e-21	4.58694e-20	0.883107	cg15892280
chr22	18463000	18463686	687	40	miRNA	MIR648	ENSG00000207780	20259	MICAL3	ENSG00000243156	18.2326	34.4279	16.1953	31.4919	76.0167	44.5248	19.2498	26.484	7.23418	5.05205e-08	8.88182e-08	0.585034	cg03078520;cg00227156
chr22	50609514	50610627	1114	323	nonsense_mediated_decay	PANX2	ENSG00000073150	353	PANX2	ENSG00000073150	38.8305	60.2379	21.4074	37.1169	88.9781	51.8612	53.7532	61.0355	7.28236	3.18358e-10	6.80411e-10	0.75907	cg26190233;cg01641620;cg25211938
Hypomethylated DMRs
Chromosome	Start	End	Width	Distance to Closest TSS 1	Closest Transcript Type	Closest Gene Name	Closest Gene ID	Distance to Closest Protein-coding TSS 1	Closest Protein-coding Gene Name	Closest Protein-coding Gene ID	NPF Mean Methylation	CAF Mean Methylation	Mean Difference % (Fibroblasts)	PrEC Mean Methylation	LNCaP Mean Methylation	Mean Difference (Epithelial) (%)	Mean TCGA Normal Methylation (%)	Mean TCGA Cancer Methylation (%)	Mean Difference (%)	P Value	FDR	AUC	HM450 probes
chr1	3121072	3121528	457	-32966	processed_transcript	PRDM16	ENSG00000142611	-39167	PRDM16	ENSG00000142611	56.0326	34.7639	-21.2687	74.6867	42.7229	-31.9638	87.6025	83.8046	-3.79784	0.0001089	0.000185534	0.549433	cg05804170
chr1	3141814	3142026	213	-12468	processed_transcript	PRDM16	ENSG00000142611	-18669	PRDM16	ENSG00000142611	40.548	14.9635	-25.5844	89.4668	18.2102	-71.2566	87.1799	77.5047	-9.6752	4.48303e-10	1.33045e-09	0.674036	cg11710123
chr1	5817321	5817516	196	58502	miRNA	AL356693.1	ENSG00000216045	-234009	KCNAB2	ENSG00000069424	51.2653	31.6336	-19.6316	74.2231	22.4688	-51.7543	83.8458	78.1603	-5.68545	5.14298e-07	1.15403e-06	0.58288	cg06744481;cg26606551
chr1	98383350	98383686	337	2866	protein_coding	DPYD	ENSG00000188641	2866	DPYD	ENSG00000188641	68.9989	49.4902	-19.5088	82.7247	9.93659	-72.7881	79.5731	70.1176	-9.45552	2.93629e-34	2.70139e-32	0.810034	cg18269457
chr1	156697041	156697368	328	0	processed_transcript	ISG20L2	ENSG00000143319	858	ISG20L2	ENSG00000143319	72.9741	47.099	-25.8751	51.5544	13.6176	-37.9368	67.5067	44.135	-23.3717	3.70232e-23	6.81226e-22	0.927608	cg19377421
chr1	182923215	182923750	536	-554	processed_transcript	SHCBP1L	ENSG00000157060	-858	SHCBP1L	ENSG00000157060	72.4906	50.6105	-21.8801	92.4796	60.1994	-32.2801	72.6351	67.682	-4.95313	9.46365e-12	3.62773e-11	0.703968	cg26419869;cg05969496
chr1	207995752	207996549	798	0	processed_transcript	C1orf132	ENSG00000203709	52067	CD46	ENSG00000117335	69.095	30.3447	-38.7503	58.169	19.5059	-38.6632	31.3356	22.5068	-8.82881	5.95373e-11	2.10671e-10	0.803345	cg22793142;cg04845871;cg15393490
chr1	214358661	214359286	626	-95158	processed_transcript	SMYD2	ENSG00000143499	-95289	SMYD2	ENSG00000143499	54.958	34.6139	-20.3441	88.7977	6.82109	-81.9766	86.0657	78.9939	-7.07183	1.6073e-22	2.11245e-21	0.747279	cg00991871
chr2	106103439	106104292	854	-48468	protein_coding	FHL2	ENSG00000115641	-48468	FHL2	ENSG00000115641	55.5764	39.9293	-15.6471	85.1691	41.4248	-43.7443	79.1569	77.5884	-1.56849	0.0315918	0.0392762	0.572619	cg21557087
chr2	151395260	151395686	427	0	protein_coding	RND3	ENSG00000115963	0	RND3	ENSG00000115963	59.3433	38.6999	-20.6434	83.7348	53.2135	-30.5214	64.8436	60.1045	-4.73903	0.000685613	0.00101736	0.591837	cg19035395
chr3	117717026	117717221	196	-586	lincRNA	RP11-384F7.2	ENSG00000239268	-930	LSAMP	ENSG00000185565	51.8585	33.3048	-18.5537	49.1201	0.261347	-48.8587	43.8559	22.8339	-21.022	2.18998e-15	1.11932e-14	0.877211	cg27182476
chr4	1203104	1203168	65	-353	processed_transcript	SPON2	ENSG00000159674	-469	SPON2	ENSG00000159674	63.6618	45.0755	-18.5863	56.1833	3.68608	-52.4972	35.3495	26.5362	-8.81324	0.000497784	0.000763269	0.703175	cg17232217;cg15203271
chr4	7394625	7395488	864	10999	processed_transcript	SORCS2	ENSG00000184985	10999	SORCS2	ENSG00000184985	59.5104	30.1545	-29.3559	73.1505	15.2887	-57.8618	67.2388	56.746	-10.4928	1.48917e-12	5.95667e-12	0.772732	cg10444491;cg07695269;cg05089225;cg12710228;cg12443213
chr4	114238156	114238406	251	-201	retained_intron	ANK2	ENSG00000145362	-1334	ANK2	ENSG00000145362	68.9209	48.0987	-20.8221	72.0018	30.9203	-41.0815	67.3343	57.7167	-9.61761	6.08865e-05	0.00010569	0.626247	cg04522984
chr5	1949277	1949722	446	9390	lincRNA	RP11-259O2.1	ENSG00000248994	-61926	IRX4	ENSG00000113430	48.5578	17.3789	-31.1789	80.9331	36.2561	-44.677	47.7815	43.8763	-3.90519	0.00355295	0.00487867	0.617687	cg00621247;cg09717516
chr5	1966734	1967990	1257	0	lincRNA	RP11-259O2.2	ENSG00000248597	-79383	IRX4	ENSG00000113430	37.0398	16.6132	-20.4266	79.177	18.0187	-61.1583	73.5956	57.2856	-16.31	1.30037e-10	4.43088e-10	0.780215	cg06999858
chr5	3327977	3328183	207	-124746	lincRNA	RP11-121L11.3	ENSG00000249830	-79383	IRX1	ENSG00000170549	77.4929	53.0541	-24.4388	87.4165	56.8442	-30.5724	85.3086	74.8088	-10.4998	1.16102e-18	8.90116e-18	0.755952	cg11566520
chr5	79141366	79142105	740	3563	processed_pseudogene	CTC-431G16.3	ENSG00000238254	144962	MTX3	ENSG00000177034	64.2327	40.7748	-23.4579	80.5557	43.5456	-37.0101	78.558	69.9699	-8.58806	9.26853e-13	3.87593e-12	0.73305	cg22172610
chr5	110411737	110412017	281	2724	protein_coding	TSLP	ENSG00000145777	2724	TSLP	ENSG00000145777	75.9888	55.4492	-20.5396	87.4951	36.3336	-51.1615	78.8905	69.7937	-9.09688	1.73695e-17	1.06533e-16	0.728685	cg20710777
chr5	150912339	150912409	71	-805	protein_coding	FAT2	ENSG00000086570	-805	FAT2	ENSG00000086570	61.902	46.6941	-15.2079	91.8719	33.6394	-58.2325	79.9974	76.9674	-3.02999	3.35991e-06	6.86915e-06	0.58305	cg00599601
chr6	52408863	52409810	948	31902	protein_coding	TRAM2	ENSG00000065308	31902	TRAM2	ENSG00000065308	67.9077	33.5987	-34.3089	86.0203	44.7626	-41.2578	78.4085	73.2703	-5.13822	2.35984e-10	7.48639e-10	0.712245	cg12793314
chr6	152127502	152127821	320	-509	protein_coding	ESR1	ENSG00000091831	-509	ESR1	ENSG00000091831	53.0108	29.2227	-23.7881	72.5445	18.1652	-54.3793	85.2222	82.2657	-2.95646	9.5672e-06	1.83371e-05	0.682766	cg15543523;cg26089753
chr6	152589214	152589566	353	0	retained_intron	SYNE1	ENSG00000131018	33691	SYNE1	ENSG00000131018	54.698	20.0143	-34.6837	70.9558	34.79	-36.1658	28.5013	19.62	-8.88132	0.00139809	0.00204166	0.701417	cg11318342
chr6	152620413	152620697	285	2560	protein_coding	SYNE1	ENSG00000131018	2560	SYNE1	ENSG00000131018	79.2502	44.1695	-35.0807	92.1373	52.2414	-39.8959	84.403	78.0689	-6.33404	2.10369e-13	9.67696e-13	0.741213	cg17979719
chr7	1787205	1787439	235	2971	protein_coding	ELFN1	ENSG00000225968	2971	ELFN1	ENSG00000225968	61.1589	37.3583	-23.8006	67.7132	18.9373	-48.776	67.6502	47.2973	-20.3529	2.04996e-16	1.10939e-15	0.831746	cg15703970;cg22104371
chr7	2451691	2452205	515	7956	protein_coding	CHST12	ENSG00000136213	7956	CHST12	ENSG00000136213	55.9908	29.279	-26.7119	46.1912	6.02452	-40.1667	19.7647	11.1107	-8.65393	0.00408721	0.00544961	0.67432	cg17228698
chr7	2943926	2944317	392	18356	retained_intron	CARD11	ENSG00000198286	25376	CARD11	ENSG00000198286	49.9253	31.5327	-18.3927	77.2002	18.4949	-58.7053	72.6719	53.6013	-19.0706	1.0437e-14	5.05369e-14	0.844444	cg12447398
chr7	38217046	38217216	171	-607	protein_coding	STARD3NL	ENSG00000010270	-607	STARD3NL	ENSG00000010270	62.768	45.1644	-17.6036	51.6973	16.8817	-34.8156	81.9875	71.5779	-10.4096	1.37633e-21	1.58278e-20	0.836224	cg04820440
chr7	89840271	89840433	163	515	antisense	STEAP2-AS1	ENSG00000227646	-566	STEAP2	ENSG00000157214	55.2612	29.6987	-25.5625	38.7381	0.624979	-38.1131	24.0355	11.3162	-12.7193	7.4073e-09	1.94706e-08	0.897109	cg14884160
chr7	120704246	120704556	311	1426	protein_coding	CPED1	ENSG00000106034	1426	CPED1	ENSG00000106034	82.4766	54.3867	-28.0899	82.2303	18.8191	-63.4112	84.7486	81.9273	-2.8213	3.70642e-07	8.52476e-07	0.632993	cg24298423
chr8	36879344	36879585	242	-33413	processed_pseudogene	AC090453.1	ENSG00000243503	92920	KCNU1	ENSG00000215262	60.7058	40.4599	-20.2459	71.8219	34.9801	-36.8419	82.4141	75.3125	-7.10168	4.41482e-08	1.12823e-07	0.751984	cg19722347
chr8	121458459	121458556	98	792	protein_coding	MTBP	ENSG00000172167	792	MTBP	ENSG00000172167	53.8466	32.578	-21.2686	42.278	8.76852	-33.5095	56.111	50.2037	-5.90728	0.0004153	0.000647587	0.614002	cg00675313
chr8	134044305	134044590	286	7995	retained_intron	SLA	ENSG00000155926	14360	TG	ENSG00000042832	74.3211	54.3999	-19.9212	78.2402	27.9991	-50.2411	80.6561	77.5618	-3.09427	0.000521689	0.00078681	0.630952	cg02526790
chr9	113340796	113341059	264	763	protein_coding	SVEP1	ENSG00000165124	763	SVEP1	ENSG00000165124	44.3666	19.732	-24.6345	40.6895	7.67247	-33.017	75.4553	63.1836	-12.2716	3.26581e-28	1.00151e-26	0.804365	cg00925831
chr10	134692348	134692567	220	-1935	retained_intron	TTC40	ENSG00000171811	-21111	TTC40	ENSG00000171811	64.9798	45.2462	-19.7335	72.6061	33.7692	-38.8369	80.8214	71.7311	-9.09026	3.0222e-11	1.11217e-10	0.719955	cg03653518;cg08710410
chr10	134720494	134721059	566	2540	retained_intron	TTC40	ENSG00000171811	35029	TTC40	ENSG00000171811	80.6492	60.5813	-20.0679	90.002	28.4682	-61.5338	83.4748	74.2814	-9.19333	5.50795e-21	5.63035e-20	0.853855	cg22836769;cg08390010
chr11	2020101	2020114	14	-995	lincRNA	H19	ENSG00000130600	35029	MRPL23	ENSG00000214026	75.5783	57.259	-18.3193	50.8451	20.4728	-30.3722	81.2489	73.4377	-7.8112	5.00051e-08	1.24337e-07	0.726134	cg16675558;cg03996735
chr11	22647987	22648107	121	-599	protein_coding	FANCF	ENSG00000183161	-599	FANCF	ENSG00000183161	68.1216	52.8055	-15.316	78.4996	40.585	-37.9146	72.1476	47.3823	-24.7652	1.53824e-23	3.53796e-22	0.906406	cg15307285;cg14814536
chr11	66082933	66083296	364	1218	protein_coding	CD248	ENSG00000174807	1218	CD248	ENSG00000174807	66.0896	42.3303	-23.7593	90.5459	56.9429	-33.603	81.2104	77.9976	-3.21281	0.00377384	0.00510578	0.601531	cg20367218
chr11	122177383	122180988	3606	0	processed_transcript	RP11-820L6.1	ENSG00000255090	-190459	BLID	ENSG00000259571	71.0417	25.8994	-45.1423	72.3373	0.467936	-71.8694	79.1603	47.0913	-32.069	2.62192e-29	1.20608e-27	0.908957	cg14530143
chr11	122611720	122613374	1655	-14700	snoRNA	snoU13	ENSG00000239079	85336	UBASH3B	ENSG00000154127	73.4568	44.6322	-28.8246	76.6626	37.5263	-39.1363	73.0057	64.265	-8.74068	7.29988e-09	1.94706e-08	0.609127	cg03463948
chr11	128500359	128500564	206	8657	lincRNA	RP11-264E20.1	ENSG00000255465	-42905	ETS1	ENSG00000134954	51.4087	37.0631	-14.3455	55.9699	15.9688	-40.0011	37.0545	27.85	-9.20454	6.71234e-08	1.62509e-07	0.762132	cg18001780
chr12	8146718	8147098	381	581	unprocessed_pseudogene	RP11-69M1.1	ENSG00000240739	-42905	FOXJ2	ENSG00000065970	70.0684	39.3398	-30.7286	66.0307	33.0875	-32.9432	40.4962	27.1035	-13.3927	7.24893e-08	1.71e-07	0.791723	cg17710334
chr12	95994735	95995879	1145	-15585	misc_RNA	Y_RNA	ENSG00000212448	-49468	USP44	ENSG00000136014	84.245	64.7745	-19.4705	88.2803	49.0608	-39.2195	89.1253	88.392	-0.733349	2.97988e-05	5.37547e-05	0.59983	cg22682582
chr12	131588528	131588961	434	12070	processed_transcript	GPR133	ENSG00000111452	27211	GPR133	ENSG00000111452	57.6772	38.8132	-18.864	79.7499	49.7105	-30.0395	70.9737	66.1654	-4.80827	8.31469e-07	1.73853e-06	0.65	cg18581657;cg23937381;cg13821287
chr12	133353502	133353847	346	-223	retained_intron	GOLGA3	ENSG00000090615	-15027	ANKLE2	ENSG00000176915	71.1841	44.2673	-26.9168	88.5648	8.45376	-80.1111	76.4845	40.9127	-35.5718	6.48851e-23	9.94904e-22	0.925113	cg23910430
chr13	110982062	110983035	974	22447	processed_transcript	COL4A2	ENSG00000134871	22447	COL4A2	ENSG00000134871	54.9358	19.0848	-35.851	92.9547	39.4689	-53.4857	79.623	71.3176	-8.30541	3.67897e-10	1.12822e-09	0.676361	cg18735775
chr15	81468354	81468928	575	-6012	nonsense_mediated_decay	IL16	ENSG00000172349	-6271	IL16	ENSG00000172349	53.5214	37.941	-15.5804	78.1892	41.2784	-36.9108	79.6792	75.7509	-3.92829	5.34321e-05	9.45337e-05	0.625454	cg00218792;cg05617678
chr16	23765289	23765521	233	-426	protein_coding	CHP2	ENSG00000166869	-426	CHP2	ENSG00000166869	64.8215	41.3233	-23.4982	75.8826	40.7301	-35.1525	73.038	61.6235	-11.4145	4.33794e-13	1.90043e-12	0.754025	cg21745164;cg05497750
chr16	23849196	23850114	919	651	protein_coding	PRKCB	ENSG00000166501	651	PRKCB	ENSG00000166501	61.529	29.3573	-32.1717	48.463	1.39794	-47.0651	41.8229	23.0497	-18.7731	2.36968e-20	2.1801e-19	0.914286	cg08327371;cg09108394
chr16	86554513	86554950	438	2552	lincRNA	RP11-463O9.9	ENSG00000270020	10379	FOXF1	ENSG00000103241	48.8978	31.1638	-17.734	65.0531	15.9372	-49.1159	73.0553	64.8408	-8.21452	6.34692e-06	1.26845e-05	0.698753	cg00986610
chr17	6921962	6922534	573	198	antisense	RP11-589P10.7	ENSG00000267047	3602	C17orf49	ENSG00000258315	71.3997	45.6867	-25.713	61.0303	25.8358	-35.1945	61.2669	54.7153	-6.55164	0.00245021	0.00352218	0.636735	cg11263011;cg04430582
chr17	27272875	27272969	95	1060	antisense	RP11-20B24.6	ENSG00000265908	3905	PHF12	ENSG00000109118	75.6938	56.8374	-18.8565	65.3769	25.9541	-39.4228	77.4779	54.2764	-23.2015	6.18117e-17	3.55417e-16	0.888322	cg22896102
chr17	32366472	32366609	138	281	processed_pseudogene	TLK2P1	ENSG00000226049	117703	ASIC2	ENSG00000108684	53.3411	37.8139	-15.5272	77.5038	15.0777	-62.4261	84.4449	77.4655	-6.97939	2.22625e-10	7.31484e-10	0.645522	cg07255889
chr19	13811133	13811609	477	-30964	retained_intron	CCDC130	ENSG00000104957	-30964	CCDC130	ENSG00000104957	37.1366	20.8752	-16.2614	44.4254	1.27061	-43.1548	49.4293	41.6808	-7.74848	0.000116508	0.000194885	0.673356	cg27480573
chr19	23870876	23871161	286	-853	protein_coding	ZNF675	ENSG00000197372	-853	ZNF675	ENSG00000197372	59.9374	42.2591	-17.6783	67.8927	13.521	-54.3717	85.2017	82.2821	-2.91965	1.95441e-18	1.28432e-17	0.754649	cg19062689
chr19	47617513	47618143	631	-503	protein_coding	ZC3H4	ENSG00000130749	-503	ZC3H4	ENSG00000130749	58.6932	16.5374	-42.1558	55.5835	9.38024	-46.2032	33.8241	23.0176	-10.8065	1.89408e-05	3.55623e-05	0.725737	cg09137630
chr20	47013735	47014175	441	-96	lincRNA	RP1-66N13.1	ENSG00000236874	430244	PREX1	ENSG00000124126	74.0603	54.4904	-19.5699	74.9052	19.744	-55.1612	86.1804	82.2751	-3.9053	2.60926e-05	4.80104e-05	0.566893	cg00070912;cg25181043;cg20845336
chr21	47403740	47404137	398	2088	protein_coding	COL6A1	ENSG00000142156	2088	COL6A1	ENSG00000142156	71.1561	43.8325	-27.3236	93.0995	10.2674	-82.8322	67.0469	58.6656	-8.38132	2.96261e-09	8.25939e-09	0.744331	cg06139893
chrX	114465698	114466014	317	2613	protein_coding	LRCH2	ENSG00000130224	2613	LRCH2	ENSG00000130224	60.7109	31.1245	-29.5864	78.1157	37.085	-41.0307	79.8246	71.4407	-8.38384	7.62091e-10	2.19101e-09	0.774036	cg05784171
