# Supplementary material for: Enduring epigenetic landmarks define the cancer microenvironment
Source: HighWire-hosted journal article supplement (doi:10.1101/gr.229070.117), 2018-04-12
Supplement: Supplemental_Table_S10.xlsx [file Supplemental_Table_S10.xlsx]

## Sheet: Supplemental Table S10
Supplemental Table S10: Primers and PCR conditions used for bisulfite sequencing of 14 candidate regions nominated by genome-wide analysis.
Primers for targeted bisulfite sequencing
# Amplification of these regions was performed under optimized PCR conditions (2 min at 95°C, followed by the optimized number of PCR cycles of 40 sec at 95°C, 1 min at the optimized annealing)
Gene Symbol	Genomic position of amplicon (hg19)	# CpGs	PCR primers (5’-3’)	Amplicon size (bp)	# PCR cycles	Annealing temp (°C)	MgCl2 (mM)
ABCB4	chr7:87,103,869-87,104,079	4	F: TTGGGTGATTATTTGATATAGGTTAATTT	211	40	59.5	1.5
			R: ATTCCCCTAACCCTTATTAAACTCA
CYP1B1	chr2:38,304,625-38,304,839	7	F: GGTTAATTAGGTAGGAATTGTATTGGTT	215	40	59.5	2
			R: AACTTCAAACCCTAACTCCACTTCT
EBF1	chr5:158,532,581-158,532,743	4	F: AGTTTGTTTGTTGGAATAGATTAAGTA	163	37	52.5	2
			R: ACTCAAAATAACTTCAACTTCTAACTATCT
EPHB6	chr7:142,553,616-142,553,847	6	F: TGATTATAGTTAAGTTTTGGAGGTGGA	232	40	59.5	1
			R: TATACTAAATCCATACCAACTCCCC
ESR1	chr6:152,013,019-152,013,267	5	F: GATTGTTTATTAGGTTTTGGAATGTATG	249	40	57.6	2.5
			R: ACTTTATTCCTTTCCTTAACTATCACAAA
GDF6	chr8:97,167,743-97,167,904	8	F: TTAGTTTATTTGGTTGGAGGAGGAT	162	40	60.9	2.5
			R: AATTCCAATCTAAACTTTATTTCCCC
GUCY1B3	chr4:156,679,691-156,679,939	4	F: TATGAATTTTGGAGTAGAGGAAATGT	249	40	57.6	1.5
			R: CCATAAACTATTATAAAACCAAACCACA
HOXD8	chr2:176,997,720-176,997,958	5	F: AAATATGGTTAGAGAAAGTAGAGAGTTTT	239	40	54.5	2
			R: TTACACCACAACTTATTACACTAAACC
IGFBP2	chr2:217,500,900-217,501,147	8	F: GTTGGGTGGGGTTTGGTTTA	248	37	62.9	1.5
			R: AACAACACAACCCCTAAATCCC
ITGA11	chr15:68,723,042-68,723,278	6	F: TTTAGGGAGTTTAGGTGGAGATTTT	237	40	57.6	2
			R: CATATTAACCTAATAACAATTCTTCCC
NEDD9	chr6:11,278,373-11,278,600	6	F: TTGGAAGGATTTAGTGAGTTAGTGT	228	40	57.6	2
			R: TTCCTATCCAAACTAATCAAACTTCTC
PITX2	chr4:111,539,984-111,540,212	12	F: AAGGGTTGGAAAAGTTTGTTGTT	229	40	59.5	1.5
			R: CTACACACCAAAATACCAAAACCA
SDC2	chr8:97,602,524-97,602,722	8	F: TTTAAGGTTATGAAAAGGGGTGAAT	199	40	54.5	1.5
			R: CACCCTACAACCAAACTACAACTCT
THBS2	chr6:169,652,038-169,652,212	5	F: GTTGAGTAATGTTGAGTATTAGTTGTGT	175	40	59.5	2
			R: CTAAACTAAATCAACCCCTAATAAAAT
