# Supplementary material for: Enduring epigenetic landmarks define the cancer microenvironment
Source: HighWire-hosted journal article supplement (doi:10.1101/gr.229070.117), 2018-04-12
Supplement: Supplemental_Table_S11.xlsx [file Supplemental_Table_S11.xlsx]

## Sheet: Supplemental Table S11
Supplemental Table S11: Primer sequences for quantitative RT-PCR
QPCR Primers
# All samples were amplified on an ABI7900HT thermocycler at 95°C for 10 min followed by 40 cycles of 95°C for 15 sec and 60°C for 1 min.
# A dissociation step (95°C for 15 sec, 60°C for 15 sec, 95°C for 15 sec) was run for all reactions.
Target Genes
Gene Symbol	Genomic position (hg19)	Primer Sequences (5’-3’)	Amplicon size (bp)	Reference
ABCB4	chr7:87051508-87053309	F: GCCCTACTTTGTCGTGGGAA	122
		R: GCTGCTTCACTGCATCATCG
CYP1B1	chr2:38298376-38301505	F: CTCCTCCTCTTCACCAGGTATC	95
		R: TCACCCATACAAGGCAGACG
EBF1	chr5:158204545-158250195	F: ATCTGGAACATGCAGCTACTCC	149
		R: CAACTCACTCCAGACCAGCA
EPHB6	chr7:142568106-142568558	F: ACAAGATGATCCGCAAGCCA	221
		R: AGGCAGGTCTTCTAGGCTGA
ESR1	chr6:152332857-152382231	F: TGATTGGTCTCGTCTGGCGCT	179	Ellem, 2014, Journal of Pathology
		R: GCACACAAACTCCTCTCCCTGC
GDF6	chr8:97157742-97172640	F: CCCACGAGTACATGCTGTCA	137
		R: CGAGAGATCGTCTAGTCCCCT
GUCY1B3	chr4:156725828-156727550	F: TGTCAACCTCACAAGCCGAA	212
		R: CCTGCTTTGTTTCCTCTGTTCC
HOXD8	chr2:176995505-176996064	F: CGGATACGATAACTTACAGAGACAG	184
		R: TCTTCGTCTACCAGGAGCTTG
IGFBP2	chr2:217498632-217525308	F: GCACTTGTGAGAAGCGCCG	86
		R: GCCTCCTTCTGAGTGGTCATC
ITGA11	chr15:68650913-68661539	F: GCACCAAACTCAACCTGGGA	236
		R: GGTCTGGCACCTTTGGAGAG
NEDD9	chr6:11188534-11190406	F: CTGAAGAATGGGCCGGAGAG	217
		R: CCTTACCCTGTAGGTGGACG
PITX2	chr4:111539190-111539389	F: CAGCCTGAGACTGAAAGCA	200	Vela, 2014, Clinical and Experimental Metastasis
		R: GCCCACGACCTTCTAGCAT
SDC2	chr8:97614707-97621624	F: TGGAAACCACGACGCTGAAT	198
		R: CAGCAATGACAGCTGCTAGG
SFRP1	chr8:41161037-41166249	F: ATGCAGTTCTTCGGCTTCTACT	136	Joesting, 2005, Cancer Research
		R: AGGGAGGACACACCGTTGTG
THBS2	chr6:169622355-169623357	F: CCGGCATCGCTGTAGGTTTT	224
		R: GGAGTTCACCACCTTGAGGG
Reference Genes
Gene Symbol	Genomic position (hg19)	Primer Sequences (5’-3’)	Amplicon size (bp)	References
GAPDH	chr12:6645881-6646115	F: GCAAATTCCATGGCACCGT	106	Lawrence, 2011, Prostate
		R: TCGCCCCACTTGATTTTGG
HPRT1	chrX:133609214-133609314	F: TGAACGTCTTGCTCGAGATGTG	101	Lawrence, 2012, Endocrinology
		R: CCAGCAGGTCAGCAAAGAATTT
RPLPO	chr12:120637210-120638614	F: GCGTGGCAATCCCTGACGCACCGCCG	161	Takizawa, 2015, Oncotarget
		R: TGCGGATCTGCTGCATCTGCTTGGAGC
